# Supplementary material for: Data-In-situ Computing with One-Pixel-Multiple-Memristor Architecture for Neuromorphic Sequential Vision
Source: Nat Commun. 2026 Mar 19;17:4244. doi: 10.1038/s41467-026-70860-y (PMC13168392; doi:10.1038/s41467-026-70860-y)
Supplement: Supplementary file 4 — Source Data [file 41467_2026_70860_MOESM4_ESM.xlsx]

## Sheet: 2b
SET	Voltage	Current	Current	Current	Current	Current	Current	Current	Current	Current	Current	Current	Current	Current	Current	Current	Current	Current	Current	Current	Current	Current	Current	Current	Current	Current	Current	Current	Current	Current	Current	Current	Current	Current	Current	Current	Current	Current	Current	Current	Current	Current	Current	Current	Current	Current	Current	Current	Current
Cycle		1	2	3	4	5	6	7	8	9	10	11	12	13	14	15	16	17	18	19	20	21	22	23	24	25	26	27	28	29	30	31	32	33	34	35	36	37	38	39	40	41	42	43	44	45	46	47	48
	0	7.842e-11	7.7059e-11	4.5784e-11	1.31e-11	8.267e-11	3.189e-11	1.7708e-10	9.396e-12	6.13e-11	2.3393e-10	6.447e-11	7.9495e-11	1.3553e-10	4.023e-11	7.5395e-11	7.069e-11	8.401e-11	1.1079e-10	4.291e-11	1.5291e-10	1.2261e-10	1.507e-10	4.6237e-11	1.1768e-10	9.1342e-11	1.7722e-11	1.29452e-10	8.111e-11	1.1327e-10	5.209e-10	1.756e-11	2.37174e-10	9.552e-12	8.795e-11	1.7719e-10	6.6784e-11	7.453e-11	2.4996e-10	1.2207e-10	1.582e-10	4.041e-11	1.53515e-10	1.30526e-10	4.633e-11	3.26366e-10	2.641e-11	3.3111e-11	9.3883e-11
	0.005	5.43521e-08	8.23849e-08	1.08082e-07	5.17318e-08	6.76171e-08	4.22337e-08	6.39214e-08	7.0074e-08	4.46593e-08	7.13284e-08	6.70724e-08	5.98788e-08	5.61828e-08	6.73355e-08	6.29397e-08	4.98537e-08	5.91112e-08	1.11138e-07	5.87512e-08	4.75975e-08	6.33133e-08	8.15696e-08	6.79479e-08	4.7831e-08	4.44354e-08	6.732e-08	4.67762e-08	6.99179e-08	3.93553e-08	6.48776e-08	3.09865e-08	7.31507e-08	4.84621e-08	8.00186e-08	5.96034e-08	7.9755e-08	3.47988e-08	7.36913e-08	5.91741e-08	7.30314e-08	6.09562e-08	5.85736e-08	6.35672e-08	3.61267e-08	7.15615e-08	7.39896e-08	7.07124e-08	7.62277e-08
	0.01	1.09541e-07	1.64542e-07	2.18093e-07	1.0346e-07	1.31074e-07	8.4413e-08	1.27874e-07	1.40406e-07	8.87262e-08	1.45386e-07	1.33786e-07	1.18954e-07	1.12603e-07	1.38787e-07	1.2038e-07	1.00227e-07	1.18556e-07	2.15509e-07	1.18837e-07	1.02595e-07	1.27079e-07	1.62802e-07	1.35908e-07	9.35864e-08	8.93576e-08	1.37049e-07	9.15878e-08	1.39561e-07	7.90477e-08	1.36452e-07	6.22305e-08	1.46308e-07	9.67479e-08	1.59878e-07	1.12254e-07	1.58718e-07	6.99427e-08	1.45738e-07	1.22121e-07	1.44349e-07	1.217e-07	1.17194e-07	1.26116e-07	7.32187e-08	1.40221e-07	1.47147e-07	1.41859e-07	1.51723e-07
	0.015	1.64755e-07	2.45913e-07	3.25828e-07	1.54441e-07	1.95303e-07	1.25822e-07	1.92785e-07	2.10016e-07	1.3505e-07	2.183e-07	2.00618e-07	1.76094e-07	1.71393e-07	2.04431e-07	1.73315e-07	1.48954e-07	1.77756e-07	3.29958e-07	1.76619e-07	1.47814e-07	1.90503e-07	2.44823e-07	2.03402e-07	1.42137e-07	1.33561e-07	2.05617e-07	1.38841e-07	2.09811e-07	1.18915e-07	1.9511e-07	9.20123e-08	2.1694e-07	1.44566e-07	2.41064e-07	1.66969e-07	2.37465e-07	1.05027e-07	2.09185e-07	1.83291e-07	2.18157e-07	1.81776e-07	1.75177e-07	1.90354e-07	1.01024e-07	2.11587e-07	2.24584e-07	2.106e-07	2.28485e-07
	0.02	2.19291e-07	3.27402e-07	4.32148e-07	2.07632e-07	2.63103e-07	1.65222e-07	2.56142e-07	2.80333e-07	1.80289e-07	2.90621e-07	2.6438e-07	2.35121e-07	2.25478e-07	2.59518e-07	2.28525e-07	1.99346e-07	2.36008e-07	4.34883e-07	2.38427e-07	2.1666e-07	2.52094e-07	3.23743e-07	2.75298e-07	1.8658e-07	1.77681e-07	2.69444e-07	1.81005e-07	2.78956e-07	1.5864e-07	2.62719e-07	1.23536e-07	2.90359e-07	1.92212e-07	3.18964e-07	2.13859e-07	3.16494e-07	1.38389e-07	2.27176e-07	2.43826e-07	2.88378e-07	2.40863e-07	2.31465e-07	2.54615e-07	1.40553e-07	2.7465e-07	2.9814e-07	2.77147e-07	3.06001e-07
	0.025	2.71489e-07	4.04101e-07	5.3728e-07	2.50762e-07	3.3061e-07	2.07368e-07	3.21571e-07	3.54449e-07	2.22261e-07	3.61499e-07	3.30911e-07	2.96974e-07	2.82541e-07	3.32814e-07	2.82238e-07	2.47793e-07	2.90275e-07	5.44878e-07	2.96761e-07	2.63947e-07	3.15579e-07	4.06255e-07	3.52987e-07	2.34649e-07	2.21335e-07	3.18445e-07	2.29114e-07	3.4637e-07	1.98184e-07	3.49815e-07	1.53204e-07	3.56432e-07	2.40598e-07	3.987e-07	2.66086e-07	3.95477e-07	2.2675e-07	3.11513e-07	3.05283e-07	3.60218e-07	3.00657e-07	2.89059e-07	3.15527e-07	1.7193e-07	3.5268e-07	3.73371e-07	3.47373e-07	3.78358e-07
	0.03	3.28805e-07	4.84685e-07	6.42264e-07	3.01182e-07	3.93311e-07	2.49244e-07	3.8617e-07	4.23489e-07	2.69922e-07	4.40302e-07	3.93432e-07	3.54077e-07	3.47305e-07	4.00835e-07	3.35233e-07	2.94792e-07	3.50682e-07	6.50786e-07	3.55405e-07	3.00556e-07	3.78977e-07	4.86737e-07	4.08748e-07	2.84155e-07	2.67002e-07	4.07837e-07	2.78734e-07	4.17013e-07	2.38432e-07	4.09486e-07	1.82755e-07	4.27174e-07	2.88431e-07	4.79086e-07	3.22908e-07	4.76945e-07	2.78511e-07	3.90795e-07	3.69975e-07	4.22318e-07	3.59851e-07	3.46229e-07	3.77526e-07	1.99352e-07	4.12334e-07	4.52563e-07	4.12791e-07	4.54328e-07
	0.035	3.8338e-07	5.64387e-07	7.51696e-07	3.4911e-07	4.56633e-07	2.91882e-07	4.52332e-07	4.90255e-07	3.16677e-07	5.16671e-07	4.61038e-07	4.1282e-07	4.02105e-07	4.53691e-07	4.31975e-07	3.45565e-07	4.09617e-07	7.64422e-07	4.04995e-07	3.64674e-07	4.43411e-07	5.70086e-07	4.78597e-07	3.30923e-07	3.09541e-07	4.65953e-07	3.1857e-07	4.88546e-07	2.7849e-07	4.85855e-07	2.16638e-07	4.92539e-07	3.34942e-07	5.5676e-07	3.79295e-07	5.54642e-07	4.23001e-07	4.38627e-07	4.30906e-07	4.93868e-07	4.20261e-07	4.02089e-07	4.33908e-07	2.44566e-07	5.17861e-07	5.18673e-07	4.86373e-07	5.30693e-07
	0.04	4.41703e-07	6.45676e-07	8.5642e-07	3.98566e-07	5.27352e-07	3.31882e-07	5.18954e-07	5.57589e-07	3.63933e-07	5.854e-07	5.32185e-07	4.83575e-07	4.62614e-07	5.32177e-07	4.95757e-07	4.0071e-07	4.64723e-07	8.65689e-07	4.67257e-07	4.01254e-07	5.05844e-07	6.51869e-07	5.45143e-07	3.81839e-07	3.51851e-07	5.41409e-07	3.71807e-07	5.58514e-07	3.21013e-07	5.81682e-07	2.46006e-07	5.74921e-07	3.82923e-07	6.38073e-07	5.1661e-07	6.33131e-07	3.67033e-07	6.51681e-07	4.90873e-07	5.6303e-07	4.79276e-07	4.5773e-07	4.9692e-07	2.81495e-07	5.76411e-07	5.96204e-07	5.54322e-07	6.09313e-07
	0.045	4.97805e-07	7.28542e-07	9.62767e-07	4.43199e-07	5.98626e-07	3.73079e-07	5.85397e-07	6.25657e-07	4.08468e-07	6.67681e-07	6.05019e-07	5.30192e-07	5.19434e-07	6.18009e-07	5.57334e-07	4.4493e-07	5.37296e-07	9.93907e-07	5.13261e-07	4.83828e-07	5.72789e-07	7.35205e-07	6.18749e-07	4.32161e-07	3.98091e-07	6.0562e-07	4.1825e-07	6.23487e-07	3.60649e-07	6.33067e-07	2.78564e-07	6.38283e-07	4.32066e-07	7.14762e-07	6.97096e-07	7.09604e-07	3.15575e-07	5.99429e-07	5.41185e-07	6.29733e-07	5.39637e-07	5.1449e-07	5.50766e-07	3.1254e-07	6.47971e-07	6.51138e-07	6.23917e-07	6.84352e-07
	0.05	5.57669e-07	8.11745e-07	1.08141e-06	4.9683e-07	6.60482e-07	4.13146e-07	6.53683e-07	6.91676e-07	4.57161e-07	7.41553e-07	6.67189e-07	5.84357e-07	5.78563e-07	6.72512e-07	6.16408e-07	4.98592e-07	5.98226e-07	1.12329e-06	5.88761e-07	5.26682e-07	6.40877e-07	8.12633e-07	6.90584e-07	4.8794e-07	4.41212e-07	6.72694e-07	4.58594e-07	6.95797e-07	4.02843e-07	7.21857e-07	3.09551e-07	7.09388e-07	4.79397e-07	7.98362e-07	7.98327e-07	7.90849e-07	3.50112e-07	7.16249e-07	5.99321e-07	7.02428e-07	6.00583e-07	5.67789e-07	6.10046e-07	3.75113e-07	7.31899e-07	7.35483e-07	6.93371e-07	7.61691e-07
	0.055	6.12435e-07	8.96077e-07	7.86355e-07	5.48032e-07	7.36988e-07	4.56912e-07	7.21969e-07	7.77969e-07	5.04363e-07	8.33324e-07	7.2284e-07	6.55175e-07	6.46135e-07	7.33164e-07	6.77932e-07	5.55457e-07	6.59278e-07	8.3461e-07	6.51919e-07	6.03559e-07	7.08152e-07	8.95486e-07	7.60311e-07	5.34611e-07	4.84747e-07	7.48203e-07	5.00388e-07	7.71546e-07	4.48301e-07	7.87084e-07	3.40234e-07	7.72498e-07	5.27762e-07	8.79866e-07	8.80928e-07	8.73172e-07	5.02497e-07	7.5909e-07	6.62863e-07	7.70753e-07	6.57651e-07	6.24733e-07	6.79727e-07	3.91693e-07	8.04464e-07	8.06575e-07	7.53683e-07	8.35936e-07
	0.06	6.62455e-07	9.79435e-07	9.09107e-07	5.93367e-07	8.02923e-07	4.96609e-07	7.92621e-07	8.76094e-07	5.51938e-07	9.07032e-07	8.09742e-07	7.28838e-07	7.06032e-07	8.11332e-07	7.42314e-07	6.02669e-07	7.22586e-07	9.01478e-07	7.13205e-07	6.34832e-07	7.77589e-07	9.82888e-07	8.3523e-07	5.95737e-07	5.28382e-07	8.1969e-07	5.55705e-07	8.45115e-07	4.88018e-07	8.76663e-07	3.72594e-07	8.42628e-07	5.77201e-07	9.64701e-07	9.53857e-07	9.50592e-07	6.43046e-07	8.65265e-07	7.3015e-07	8.49972e-07	7.18441e-07	6.78655e-07	7.27508e-07	4.20418e-07	8.82291e-07	8.8097e-07	8.31632e-07	9.0904e-07
	0.065	7.27994e-07	1.06547e-06	9.83722e-07	6.41574e-07	8.74231e-07	5.3933e-07	8.27712e-07	9.49291e-07	6.03762e-07	1.03512e-06	8.82994e-07	7.71953e-07	7.68519e-07	8.72006e-07	8.0308e-07	6.61382e-07	7.84378e-07	1.01249e-06	7.97705e-07	6.95907e-07	8.43979e-07	1.06856e-06	9.04198e-07	6.49915e-07	5.73632e-07	8.89664e-07	6.10747e-07	9.17317e-07	5.31712e-07	9.22151e-07	4.03875e-07	9.24348e-07	6.25995e-07	1.04631e-06	9.47566e-07	1.0331e-06	5.46574e-07	8.68267e-07	7.93348e-07	9.23332e-07	7.78402e-07	7.32405e-07	7.78077e-07	4.62728e-07	1.00126e-06	9.71881e-07	8.88155e-07	9.87207e-07
	0.07	7.98746e-07	1.15698e-06	1.01801e-06	7.04292e-07	9.51106e-07	5.87203e-07	9.32476e-07	1.02415e-06	6.50002e-07	1.10363e-06	9.4489e-07	8.52774e-07	8.22623e-07	8.81399e-07	8.67169e-07	7.30461e-07	8.5504e-07	1.06861e-06	8.73643e-07	7.96008e-07	9.10552e-07	1.14598e-06	9.74636e-07	6.99045e-07	6.1916e-07	9.67015e-07	6.38012e-07	9.63083e-07	5.786e-07	1.00826e-06	4.40586e-07	9.68605e-07	6.74543e-07	1.13328e-06	1.10961e-06	1.10452e-06	9.31581e-07	8.2302e-07	8.63417e-07	9.86574e-07	8.86468e-07	7.79933e-07	8.55912e-07	4.8996e-07	8.29027e-07	1.03997e-06	9.65311e-07	1.06775e-06
	0.075	8.55905e-07	1.24261e-06	1.16059e-06	7.41467e-07	1.0091e-06	6.25249e-07	9.9863e-07	1.10113e-06	7.02159e-07	1.17728e-06	1.01184e-06	9.00945e-07	8.91001e-07	9.4205e-07	9.24434e-07	7.83099e-07	9.17489e-07	1.214e-06	9.41067e-07	9.25042e-07	9.7963e-07	1.23558e-06	1.03724e-06	7.49518e-07	6.62984e-07	1.02987e-06	6.79706e-07	1.0664e-06	6.27504e-07	1.06624e-06	4.74665e-07	1.05448e-06	7.23469e-07	1.22986e-06	1.14645e-06	1.19722e-06	6.07504e-07	1.09157e-06	9.22451e-07	1.05557e-06	9.49733e-07	8.31904e-07	9.06709e-07	5.48596e-07	9.03619e-07	1.11108e-06	1.03964e-06	1.15238e-06
	0.08	9.25685e-07	1.32814e-06	1.28606e-06	7.97357e-07	1.09137e-06	6.63759e-07	1.07246e-06	1.14806e-06	7.51271e-07	1.25593e-06	1.08885e-06	9.52213e-07	9.49451e-07	1.00944e-06	9.85077e-07	8.402e-07	9.7977e-07	1.30905e-06	9.90427e-07	9.96339e-07	1.05015e-06	1.32218e-06	1.10847e-06	8.26098e-07	7.06349e-07	1.09148e-06	7.39294e-07	1.13267e-06	6.74089e-07	1.16598e-06	5.08006e-07	1.10242e-06	7.71165e-07	1.31677e-06	1.2339e-06	1.2705e-06	7.97823e-07	1.14145e-06	9.97522e-07	1.13904e-06	1.01356e-06	8.87294e-07	9.57875e-07	5.81525e-07	9.9307e-07	1.17059e-06	1.08913e-06	1.24276e-06
	0.085	9.80103e-07	1.41841e-06	1.28913e-06	8.4526e-07	1.15791e-06	7.11391e-07	1.14488e-06	1.15237e-06	8.02093e-07	1.36766e-06	1.32209e-06	1.01321e-06	1.01453e-06	1.07353e-06	1.04995e-06	9.06151e-07	1.04218e-06	1.38345e-06	1.04773e-06	9.26873e-07	1.11453e-06	1.40848e-06	1.19266e-06	8.87467e-07	7.50088e-07	1.17264e-06	8.15659e-07	1.20647e-06	7.19231e-07	1.22935e-06	5.44896e-07	1.19524e-06	8.1042e-07	1.40193e-06	1.31107e-06	1.34851e-06	6.3536e-07	1.10424e-06	1.06794e-06	1.21672e-06	1.07943e-06	9.42635e-07	1.01021e-06	6.15254e-07	1.05598e-06	1.29131e-06	1.15405e-06	1.31026e-06
	0.09	1.04751e-06	1.51281e-06	1.3372e-06	9.10231e-07	1.23428e-06	7.56589e-07	1.21518e-06	1.18388e-06	8.59105e-07	1.45853e-06	1.43523e-06	1.09839e-06	1.07829e-06	1.13124e-06	1.10711e-06	9.48825e-07	1.11835e-06	1.46109e-06	1.08894e-06	1.00342e-06	1.18928e-06	1.4931e-06	1.26313e-06	9.32767e-07	7.99897e-07	1.24001e-06	8.38031e-07	1.28925e-06	7.64487e-07	1.3184e-06	5.75414e-07	1.253e-06	8.60863e-07	1.49627e-06	1.39246e-06	1.43146e-06	6.5357e-07	1.20153e-06	1.13563e-06	1.29769e-06	1.14559e-06	9.98165e-07	1.07066e-06	6.76322e-07	1.12069e-06	1.35436e-06	1.2263e-06	1.39744e-06
	0.095	1.0998e-06	1.60412e-06	1.58888e-06	9.85897e-07	1.31538e-06	7.92413e-07	1.28628e-06	1.24777e-06	9.2042e-07	1.46085e-06	1.49067e-06	1.18373e-06	1.1481e-06	1.20272e-06	7.48449e-07	1.00324e-06	1.1695e-06	1.54794e-06	1.28258e-06	1.12159e-06	1.25482e-06	1.58311e-06	1.33668e-06	9.81681e-07	8.51462e-07	1.31174e-06	8.92069e-07	1.36086e-06	8.15167e-07	1.38132e-06	6.13589e-07	1.32595e-06	9.11014e-07	1.57742e-06	1.45193e-06	1.50927e-06	8.1869e-07	1.44958e-06	1.20955e-06	1.3699e-06	1.21051e-06	1.05734e-06	1.12155e-06	7.18525e-07	1.25332e-06	1.43519e-06	1.26171e-06	1.47016e-06
	0.1	1.16465e-06	1.69642e-06	1.753e-06	1.03503e-06	1.39586e-06	8.52371e-07	1.35772e-06	1.31082e-06	9.6267e-07	1.60511e-06	1.56924e-06	1.21941e-06	1.21341e-06	1.26625e-06	7.28784e-07	1.06551e-06	1.2246e-06	1.64466e-06	1.47126e-06	1.22694e-06	1.31518e-06	1.68239e-06	1.41304e-06	1.02261e-06	8.97609e-07	1.38936e-06	9.68368e-07	1.43712e-06	8.57445e-07	1.42801e-06	6.52481e-07	1.40772e-06	9.61983e-07	1.6826e-06	1.56151e-06	1.59346e-06	9.6182e-07	1.52567e-06	1.27796e-06	1.46483e-06	1.27532e-06	1.11245e-06	1.19876e-06	7.77703e-07	1.31519e-06	1.49199e-06	1.35369e-06	1.55004e-06
	0.105	1.21111e-06	1.78791e-06	1.89988e-06	1.06619e-06	1.48597e-06	8.85333e-07	1.43758e-06	1.38702e-06	9.96234e-07	1.6727e-06	1.65261e-06	1.27642e-06	1.27988e-06	1.32953e-06	8.23925e-07	1.11629e-06	1.29042e-06	1.73353e-06	1.55074e-06	1.34911e-06	1.39369e-06	1.82547e-06	1.52917e-06	1.1043e-06	9.36829e-07	1.46855e-06	1.02444e-06	1.52049e-06	9.11592e-07	1.50109e-06	6.76317e-07	1.48309e-06	1.01401e-06	1.77907e-06	1.67326e-06	1.66511e-06	1.28577e-06	1.40984e-06	1.35921e-06	1.55551e-06	1.34442e-06	1.15713e-06	1.26304e-06	8.06585e-07	1.3352e-06	1.58189e-06	1.41373e-06	1.63357e-06
	0.11	1.29406e-06	1.87373e-06	1.8766e-06	1.21485e-06	1.57477e-06	9.29349e-07	1.51826e-06	1.44952e-06	1.04783e-06	1.74071e-06	1.727e-06	1.32506e-06	1.35869e-06	1.39248e-06	8.10543e-07	1.48261e-06	1.36032e-06	1.82332e-06	1.6346e-06	1.39679e-06	1.47283e-06	1.9199e-06	1.57828e-06	1.16517e-06	9.83954e-07	1.55188e-06	1.08761e-06	1.59839e-06	9.62445e-07	1.62771e-06	7.11124e-07	1.51033e-06	1.0642e-06	1.86059e-06	1.74973e-06	1.76533e-06	8.2053e-07	1.75559e-06	1.43539e-06	1.62979e-06	1.4155e-06	1.21955e-06	1.29747e-06	8.57186e-07	1.48572e-06	1.64353e-06	1.5003e-06	1.70846e-06
	0.115	1.35258e-06	1.95934e-06	1.92236e-06	1.2757e-06	1.61654e-06	9.71982e-07	1.59633e-06	1.52134e-06	1.10912e-06	1.88828e-06	1.83767e-06	1.39348e-06	1.41393e-06	1.45994e-06	8.58155e-07	1.55309e-06	1.43523e-06	1.91069e-06	1.7167e-06	1.35036e-06	1.53783e-06	2.02797e-06	1.60949e-06	1.26127e-06	1.03185e-06	1.62126e-06	1.16578e-06	1.7118e-06	9.91719e-07	1.71037e-06	1.16876e-06	1.61548e-06	1.1087e-06	1.96254e-06	1.81819e-06	1.84876e-06	1.03957e-06	1.76821e-06	1.51672e-06	1.71971e-06	1.501e-06	1.27516e-06	1.36816e-06	8.52787e-07	1.54422e-06	1.74478e-06	1.57278e-06	1.79278e-06
	0.12	1.43324e-06	2.06067e-06	2.03282e-06	1.34084e-06	1.7063e-06	1.021e-06	1.66265e-06	1.59168e-06	1.15827e-06	2.12752e-06	2.03551e-06	1.46177e-06	1.47721e-06	1.52172e-06	9.0712e-07	1.62431e-06	1.50534e-06	2.004e-06	1.81927e-06	1.43936e-06	1.60034e-06	2.11998e-06	1.7472e-06	1.26678e-06	1.08845e-06	1.70607e-06	1.24362e-06	1.7818e-06	1.06009e-06	1.74661e-06	1.22361e-06	1.69092e-06	1.07299e-06	2.06499e-06	1.9107e-06	1.92269e-06	9.6395e-07	1.61003e-06	1.58623e-06	1.78492e-06	1.60489e-06	1.34062e-06	1.42333e-06	9.20021e-07	1.6166e-06	1.84289e-06	1.65383e-06	1.86951e-06
	0.125	1.46602e-06	2.15945e-06	2.0842e-06	1.40799e-06	1.77808e-06	1.07924e-06	1.73927e-06	1.66615e-06	1.21367e-06	2.13973e-06	1.98228e-06	1.53837e-06	1.55261e-06	1.59695e-06	1.60018e-06	1.69818e-06	1.59096e-06	2.08276e-06	1.79785e-06	1.53794e-06	1.68501e-06	2.21807e-06	1.7307e-06	1.33391e-06	1.13484e-06	1.78123e-06	1.30487e-06	1.84762e-06	1.1004e-06	1.85304e-06	1.26959e-06	1.77571e-06	1.40246e-06	2.17091e-06	2.0021e-06	2.01396e-06	1.13486e-06	1.97248e-06	1.67266e-06	1.87274e-06	1.64781e-06	1.38662e-06	1.4727e-06	1.01915e-06	1.71835e-06	1.9465e-06	1.71994e-06	1.95948e-06
	0.13	1.53695e-06	2.26132e-06	2.17446e-06	1.45998e-06	1.86811e-06	1.13118e-06	1.8077e-06	1.73578e-06	1.27349e-06	2.2772e-06	2.04897e-06	1.58988e-06	1.61866e-06	1.65996e-06	1.67067e-06	1.78139e-06	1.6637e-06	2.18167e-06	2.00857e-06	1.68108e-06	1.75369e-06	2.31165e-06	1.7255e-06	1.41066e-06	1.12329e-06	1.8634e-06	1.3743e-06	1.85913e-06	1.15426e-06	1.93585e-06	1.33571e-06	1.83064e-06	1.49123e-06	2.25581e-06	2.07213e-06	2.10484e-06	1.59396e-06	2.07147e-06	1.75491e-06	1.93075e-06	1.7218e-06	1.44975e-06	1.53534e-06	1.02838e-06	1.84461e-06	2.01421e-06	1.79168e-06	2.04498e-06
	0.135	1.61683e-06	2.35978e-06	2.2937e-06	1.52763e-06	1.93943e-06	1.1525e-06	1.8876e-06	1.80397e-06	1.34504e-06	2.41599e-06	2.13654e-06	1.66199e-06	1.38114e-06	1.72571e-06	1.78359e-06	1.87003e-06	1.76069e-06	2.28348e-06	2.05912e-06	1.71856e-06	1.82288e-06	2.40351e-06	1.80379e-06	1.43787e-06	1.18736e-06	1.94135e-06	1.44733e-06	1.95152e-06	1.20348e-06	1.97984e-06	1.38908e-06	1.91364e-06	1.57009e-06	2.36087e-06	2.1491e-06	2.97917e-06	1.07404e-06	2.08457e-06	2.12348e-06	2.01231e-06	1.78959e-06	1.49787e-06	1.59038e-06	1.06899e-06	1.94605e-06	2.09411e-06	2.07109e-06	2.10366e-06
	0.14	1.67768e-06	2.46104e-06	2.37233e-06	1.59746e-06	2.03519e-06	1.20217e-06	1.96141e-06	1.86779e-06	1.39671e-06	2.51057e-06	2.22534e-06	2.60788e-06	1.27476e-06	1.79936e-06	1.93867e-06	1.88836e-06	1.8474e-06	2.38886e-06	2.1541e-06	1.7246e-06	1.91234e-06	2.51286e-06	1.86876e-06	1.5131e-06	1.23852e-06	2.02585e-06	1.45577e-06	2.03878e-06	1.24667e-06	2.10117e-06	1.59547e-06	2.01479e-06	1.47578e-06	2.47178e-06	2.24202e-06	2.08588e-06	1.23011e-06	2.30451e-06	2.33179e-06	2.08169e-06	1.87257e-06	1.56095e-06	1.6446e-06	1.11325e-06	2.05054e-06	2.13866e-06	2.21724e-06	2.18212e-06
	0.145	1.73818e-06	2.56193e-06	2.48711e-06	1.67726e-06	2.11459e-06	1.27365e-06	2.03062e-06	1.94808e-06	1.46366e-06	2.61748e-06	2.31324e-06	2.78418e-06	1.32262e-06	1.85993e-06	2.73925e-06	2.01506e-06	1.91017e-06	2.46916e-06	2.2638e-06	2.02556e-06	1.98037e-06	2.62233e-06	1.95996e-06	1.60745e-06	1.2916e-06	2.11664e-06	1.5401e-06	2.20128e-06	1.30806e-06	2.1372e-06	1.9388e-06	2.10855e-06	1.43173e-06	2.57828e-06	2.33528e-06	2.175e-06	1.53837e-06	2.42907e-06	2.14082e-06	2.19304e-06	1.94314e-06	1.61734e-06	1.68937e-06	1.17325e-06	2.12613e-06	2.22208e-06	2.2856e-06	2.22562e-06
	0.15	1.81635e-06	2.66258e-06	2.58779e-06	1.75138e-06	2.04253e-06	1.3368e-06	2.11811e-06	2.0089e-06	1.52386e-06	2.84933e-06	2.40371e-06	2.87892e-06	1.3198e-06	1.92625e-06	2.89557e-06	2.11001e-06	1.99994e-06	2.56721e-06	2.36503e-06	1.9669e-06	2.07353e-06	2.73319e-06	2.06325e-06	1.64628e-06	1.34351e-06	2.26418e-06	1.57544e-06	2.29248e-06	1.35642e-06	2.19269e-06	2.0351e-06	2.17556e-06	1.46265e-06	2.66534e-06	2.42697e-06	2.25613e-06	1.36892e-06	2.42823e-06	2.11064e-06	2.27657e-06	2.00919e-06	1.68357e-06	1.73856e-06	1.2088e-06	2.33426e-06	2.30433e-06	2.39896e-06	2.16417e-06
	0.155	1.88168e-06	2.76341e-06	2.65706e-06	1.79936e-06	1.91018e-06	1.39681e-06	2.1862e-06	2.08889e-06	1.59006e-06	3.12414e-06	2.58492e-06	2.99341e-06	1.31954e-06	1.99213e-06	3.02047e-06	2.69936e-06	2.07567e-06	2.67738e-06	2.46576e-06	2.15724e-06	2.1508e-06	2.83546e-06	2.15037e-06	1.69933e-06	1.39229e-06	2.28667e-06	1.70727e-06	2.38767e-06	1.3876e-06	2.38592e-06	2.09951e-06	2.24066e-06	1.56938e-06	2.75969e-06	2.0924e-06	2.34218e-06	1.59196e-06	2.60207e-06	2.18957e-06	2.36779e-06	2.08574e-06	1.75848e-06	1.81538e-06	1.25939e-06	2.43046e-06	2.39894e-06	2.46972e-06	2.2242e-06
	0.16	1.97027e-06	2.87267e-06	2.78406e-06	1.85076e-06	1.99867e-06	1.47764e-06	2.26695e-06	2.21659e-06	1.65478e-06	2.96221e-06	2.57986e-06	3.09158e-06	1.38051e-06	2.05672e-06	3.21681e-06	3.25015e-06	2.13748e-06	2.76531e-06	2.53936e-06	2.37107e-06	2.22613e-06	2.882e-06	2.23235e-06	1.77257e-06	1.44481e-06	2.37819e-06	1.7471e-06	2.44872e-06	1.43985e-06	2.43085e-06	2.19847e-06	2.34847e-06	1.62209e-06	2.90006e-06	1.80303e-06	2.44407e-06	1.84568e-06	2.76216e-06	2.51882e-06	2.46045e-06	2.16913e-06	1.77672e-06	1.8669e-06	1.30731e-06	2.48458e-06	2.60081e-06	2.5402e-06	2.30192e-06
	0.165	2.05125e-06	2.97611e-06	2.88414e-06	1.92102e-06	2.05743e-06	1.47042e-06	2.35674e-06	2.40316e-06	1.71035e-06	3.11998e-06	2.80669e-06	3.26499e-06	1.44187e-06	2.13255e-06	3.34728e-06	3.37665e-06	2.2125e-06	2.85675e-06	2.62906e-06	2.49643e-06	2.30236e-06	2.95308e-06	2.31255e-06	1.9032e-06	1.50259e-06	2.48716e-06	1.78465e-06	2.52327e-06	1.50157e-06	2.51884e-06	2.25329e-06	2.41688e-06	1.63879e-06	3.03461e-06	1.82182e-06	2.57662e-06	1.60576e-06	2.94401e-06	2.34458e-06	2.55965e-06	2.23213e-06	1.85374e-06	1.92441e-06	1.37289e-06	2.67513e-06	2.58305e-06	2.61944e-06	2.37819e-06
	0.17	2.10807e-06	3.08619e-06	2.98292e-06	2.00048e-06	2.11137e-06	1.52138e-06	2.42801e-06	2.4824e-06	1.7631e-06	3.20422e-06	2.74412e-06	3.3752e-06	1.49127e-06	2.19903e-06	3.46373e-06	3.51502e-06	2.28973e-06	2.96283e-06	2.71452e-06	2.63383e-06	2.33174e-06	3.05631e-06	2.40141e-06	1.91855e-06	1.56043e-06	2.57095e-06	1.86985e-06	2.62909e-06	1.5662e-06	2.63709e-06	2.35404e-06	2.46711e-06	1.84727e-06	3.17179e-06	1.88827e-06	2.79294e-06	1.918e-06	2.63548e-06	2.6598e-06	2.64957e-06	2.32009e-06	1.92851e-06	1.9735e-06	1.41346e-06	2.75251e-06	2.68231e-06	2.69925e-06	2.46649e-06
	0.175	2.17949e-06	3.18293e-06	3.00959e-06	2.38884e-06	2.18585e-06	1.6096e-06	2.50982e-06	2.41421e-06	1.83655e-06	3.32629e-06	3.10237e-06	3.49824e-06	1.56812e-06	2.26891e-06	3.61935e-06	3.68895e-06	2.37749e-06	3.07433e-06	2.7396e-06	2.59544e-06	2.4083e-06	3.15587e-06	2.49801e-06	1.9545e-06	1.56456e-06	2.67309e-06	1.95513e-06	2.71342e-06	1.61073e-06	3.10265e-06	2.42141e-06	2.51413e-06	2.11675e-06	3.27619e-06	1.95241e-06	2.93491e-06	1.76441e-06	3.03257e-06	2.47032e-06	2.75007e-06	2.39826e-06	2.00396e-06	1.9907e-06	1.4725e-06	2.84196e-06	2.78596e-06	2.75349e-06	2.53699e-06
	0.18	2.28593e-06	3.29913e-06	3.1793e-06	2.53366e-06	2.24554e-06	1.62697e-06	2.57621e-06	2.49178e-06	1.90206e-06	3.33789e-06	3.19605e-06	3.58467e-06	1.5967e-06	2.33434e-06	3.71527e-06	3.82604e-06	2.46708e-06	3.17462e-06	2.89834e-06	2.6965e-06	2.48553e-06	3.26068e-06	2.57353e-06	2.00451e-06	1.57978e-06	2.76741e-06	2.0119e-06	2.79559e-06	1.66323e-06	3.24361e-06	2.51163e-06	2.60507e-06	2.4954e-06	3.39506e-06	2.02484e-06	3.04582e-06	1.66949e-06	3.06912e-06	2.56275e-06	2.8336e-06	2.47795e-06	2.05923e-06	2.04457e-06	1.51418e-06	2.95814e-06	2.89089e-06	2.83912e-06	2.62196e-06
	0.185	2.5057e-06	3.41316e-06	3.28097e-06	2.56681e-06	2.34821e-06	1.68093e-06	2.65808e-06	2.52274e-06	1.95617e-06	5.35689e-06	3.18622e-06	3.58639e-06	1.66421e-06	2.3983e-06	3.91304e-06	3.93845e-06	2.53767e-06	3.27308e-06	2.86907e-06	2.75864e-06	2.56278e-06	3.38012e-06	2.64793e-06	2.10309e-06	1.66461e-06	2.86376e-06	2.07748e-06	2.90614e-06	1.71286e-06	3.16311e-06	2.58387e-06	2.65945e-06	2.38453e-06	3.51085e-06	2.08713e-06	3.15461e-06	2.04585e-06	3.20815e-06	2.68182e-06	2.95094e-06	2.61518e-06	2.10442e-06	2.09104e-06	1.58078e-06	3.09377e-06	2.96872e-06	2.88559e-06	2.72117e-06
	0.19	2.55142e-06	3.52129e-06	3.39035e-06	2.60805e-06	2.42339e-06	1.73905e-06	2.72975e-06	2.57862e-06	2.00148e-06	5.08928e-06	3.30771e-06	3.82448e-06	1.69352e-06	2.47298e-06	3.99619e-06	4.09514e-06	2.60965e-06	3.38844e-06	3.08659e-06	2.85251e-06	2.6425e-06	3.5284e-06	2.75999e-06	2.36257e-06	1.96685e-06	2.95358e-06	2.14026e-06	2.99559e-06	1.76693e-06	3.31815e-06	2.67444e-06	2.71807e-06	2.04813e-06	3.62423e-06	2.15908e-06	3.27059e-06	1.9116e-06	3.13856e-06	2.8492e-06	3.06358e-06	2.5504e-06	2.17011e-06	2.15175e-06	1.63919e-06	3.27352e-06	3.08057e-06	2.97145e-06	2.80103e-06
	0.195	2.61588e-06	3.6266e-06	3.46306e-06	2.741e-06	2.50393e-06	1.8182e-06	2.82088e-06	2.64999e-06	2.06834e-06	3.8597e-06	3.3826e-06	3.94622e-06	1.76236e-06	2.55111e-06	4.18192e-06	4.21363e-06	2.69782e-06	3.49917e-06	3.17509e-06	2.99223e-06	2.72855e-06	3.61108e-06	2.85058e-06	2.3326e-06	2.75376e-06	3.05054e-06	2.25594e-06	3.04381e-06	1.823e-06	3.54463e-06	2.75006e-06	2.78337e-06	2.00151e-06	3.76281e-06	2.2216e-06	3.35886e-06	2.1396e-06	3.38105e-06	2.87446e-06	3.14938e-06	2.58927e-06	2.21634e-06	2.21106e-06	1.68665e-06	3.43247e-06	3.19781e-06	3.11048e-06	2.89177e-06
	0.2	2.70027e-06	3.73773e-06	3.57783e-06	2.77146e-06	2.57481e-06	1.87137e-06	2.89728e-06	2.69332e-06	2.12349e-06	4.23271e-06	3.45345e-06	4.06182e-06	2.58745e-06	2.59008e-06	4.33893e-06	4.36662e-06	2.72992e-06	3.60955e-06	3.34665e-06	3.08865e-06	2.80783e-06	3.58019e-06	2.92658e-06	2.21936e-06	2.82964e-06	3.14878e-06	3.12974e-06	3.1303e-06	1.89153e-06	3.69933e-06	2.8479e-06	2.86643e-06	2.06487e-06	3.85956e-06	2.30271e-06	3.45732e-06	1.84238e-06	3.78059e-06	2.94077e-06	3.23863e-06	2.6486e-06	2.31397e-06	2.25425e-06	1.75123e-06	3.58986e-06	3.30065e-06	3.16966e-06	2.96464e-06
	0.205	2.77581e-06	3.84238e-06	3.70724e-06	2.85128e-06	2.64979e-06	1.89489e-06	2.97669e-06	2.81733e-06	2.20214e-06	4.33162e-06	3.5378e-06	4.18511e-06	3.08796e-06	2.47358e-06	4.51603e-06	4.51721e-06	2.82246e-06	3.71967e-06	3.33184e-06	3.23771e-06	2.88695e-06	3.69534e-06	3.05886e-06	2.361e-06	2.91907e-06	3.19393e-06	3.17865e-06	3.16333e-06	1.95862e-06	3.91496e-06	2.92449e-06	2.94331e-06	2.14474e-06	3.99279e-06	2.37586e-06	3.53542e-06	1.68209e-06	3.6429e-06	3.01782e-06	3.39188e-06	2.73518e-06	2.3488e-06	2.32121e-06	1.80662e-06	3.77143e-06	3.44361e-06	3.23845e-06	3.04524e-06
	0.21	2.83792e-06	3.92422e-06	3.55275e-06	3.35628e-06	2.73979e-06	1.97023e-06	3.05403e-06	2.96644e-06	2.31832e-06	4.40299e-06	3.64468e-06	4.29959e-06	3.36493e-06	2.52892e-06	4.63555e-06	4.64084e-06	2.90741e-06	3.8414e-06	3.09263e-06	3.34259e-06	3.04633e-06	3.8497e-06	3.13997e-06	2.45486e-06	2.99545e-06	3.27148e-06	3.65222e-06	3.2156e-06	2.01736e-06	4.1366e-06	2.8332e-06	3.02601e-06	2.34221e-06	4.10334e-06	2.44807e-06	3.67126e-06	2.26702e-06	3.79688e-06	3.09801e-06	3.49529e-06	2.83032e-06	2.39242e-06	2.39129e-06	1.86815e-06	3.8942e-06	3.71377e-06	3.35927e-06	3.13133e-06
	0.215	2.91649e-06	4.04054e-06	3.68127e-06	3.55415e-06	2.80178e-06	2.00357e-06	3.0847e-06	3.05335e-06	2.38481e-06	4.54195e-06	3.72961e-06	4.40319e-06	3.47114e-06	2.60994e-06	4.79056e-06	4.81134e-06	2.99871e-06	3.88989e-06	3.18359e-06	3.42599e-06	3.14233e-06	3.89125e-06	3.30514e-06	2.50452e-06	3.08466e-06	3.2346e-06	3.76862e-06	3.34875e-06	2.06631e-06	4.37875e-06	2.70513e-06	3.13399e-06	2.58079e-06	4.23324e-06	2.5191e-06	3.75729e-06	1.91432e-06	3.93231e-06	3.25442e-06	3.59433e-06	2.9079e-06	2.47071e-06	2.45089e-06	1.93344e-06	4.02488e-06	3.70585e-06	3.52083e-06	3.21568e-06
	0.22	2.99159e-06	4.16347e-06	3.79716e-06	3.76942e-06	2.88189e-06	2.04562e-06	3.21405e-06	3.12875e-06	2.46743e-06	4.27772e-06	3.83613e-06	4.57557e-06	4.11441e-06	2.68385e-06	4.97486e-06	4.92628e-06	3.0703e-06	4.08068e-06	3.62821e-06	3.76169e-06	3.1845e-06	4.02429e-06	3.54935e-06	2.69564e-06	3.18471e-06	3.15624e-06	3.8799e-06	3.38921e-06	2.13896e-06	4.51344e-06	2.85308e-06	3.22903e-06	2.65795e-06	4.33485e-06	2.595e-06	3.86932e-06	2.24542e-06	4.04848e-06	3.29085e-06	3.70634e-06	3.01535e-06	2.57418e-06	2.69891e-06	2.00098e-06	4.1693e-06	3.80216e-06	3.72621e-06	3.30395e-06
	0.225	3.05203e-06	4.26902e-06	3.86408e-06	3.97694e-06	2.96791e-06	2.20594e-06	3.14899e-06	3.21006e-06	2.54107e-06	4.32617e-06	3.93697e-06	4.66038e-06	3.14749e-06	2.74497e-06	5.10495e-06	5.09843e-06	3.16449e-06	4.10675e-06	3.31682e-06	3.92191e-06	3.29211e-06	4.12865e-06	3.65243e-06	5.49039e-06	3.27236e-06	2.61562e-06	4.03718e-06	3.55276e-06	2.1906e-06	4.63417e-06	2.91635e-06	3.31886e-06	2.7268e-06	4.45104e-06	2.68882e-06	3.9683e-06	2.08471e-06	4.12348e-06	3.38101e-06	3.82365e-06	3.03915e-06	2.6063e-06	2.72257e-06	3.44517e-06	4.31128e-06	4.04965e-06	3.84959e-06	3.38282e-06
	0.23	2.96434e-06	4.38859e-06	3.95964e-06	4.07984e-06	3.08085e-06	2.20614e-06	3.31574e-06	3.26804e-06	2.63364e-06	4.92767e-06	3.98563e-06	4.8087e-06	3.2533e-06	2.81266e-06	5.28813e-06	5.23798e-06	3.22555e-06	4.26653e-06	3.43075e-06	4.03597e-06	3.41294e-06	4.21262e-06	3.75943e-06	5.72136e-06	3.13991e-06	2.6902e-06	4.13591e-06	3.63442e-06	2.26419e-06	4.87346e-06	3.01093e-06	3.39746e-06	2.80064e-06	4.58315e-06	2.76831e-06	3.97436e-06	2.23419e-06	4.28707e-06	3.48168e-06	3.92e-06	3.17154e-06	2.7218e-06	2.49148e-06	4.35358e-06	4.44582e-06	4.14068e-06	3.95698e-06	3.46821e-06
	0.235	3.00349e-06	4.4998e-06	4.05271e-06	4.15808e-06	3.16369e-06	2.32313e-06	3.34586e-06	3.38987e-06	2.69482e-06	4.87898e-06	5.03849e-06	4.89174e-06	3.52212e-06	2.88419e-06	5.46041e-06	5.36787e-06	3.28393e-06	4.49517e-06	3.52568e-06	4.14062e-06	3.5024e-06	4.30457e-06	3.85331e-06	5.8694e-06	3.46707e-06	4.10574e-06	4.23969e-06	3.76289e-06	2.32625e-06	5.05914e-06	3.07237e-06	3.49248e-06	2.88122e-06	4.71294e-06	2.86676e-06	4.05536e-06	2.75458e-06	4.37668e-06	3.56888e-06	4.05984e-06	3.19895e-06	2.75605e-06	2.51534e-06	4.87948e-06	4.59986e-06	4.33192e-06	4.04157e-06	3.56051e-06
	0.24	3.14642e-06	4.61391e-06	4.15035e-06	3.4528e-06	3.24177e-06	2.43676e-06	3.43343e-06	3.47471e-06	2.82384e-06	4.05629e-06	5.17555e-06	5.00602e-06	3.71149e-06	2.94599e-06	5.58586e-06	5.51228e-06	3.38664e-06	4.72057e-06	3.63013e-06	4.2615e-06	3.59832e-06	4.40129e-06	3.94732e-06	5.69876e-06	3.3351e-06	3.86854e-06	4.32636e-06	3.91041e-06	2.39507e-06	5.07448e-06	3.17993e-06	3.58335e-06	2.9215e-06	4.83784e-06	2.94282e-06	4.18632e-06	2.78398e-06	4.48493e-06	3.64751e-06	4.17735e-06	3.32031e-06	2.81882e-06	2.56672e-06	5.63364e-06	4.75598e-06	3.23756e-06	4.19718e-06	3.6502e-06
	0.245	3.22001e-06	4.73971e-06	4.24825e-06	3.3287e-06	3.31309e-06	2.45508e-06	3.65901e-06	3.56674e-06	2.82104e-06	3.99133e-06	5.11928e-06	5.1256e-06	3.83894e-06	3.01647e-06	5.75056e-06	5.64562e-06	3.45752e-06	4.86385e-06	3.68195e-06	4.39915e-06	3.67696e-06	4.53057e-06	4.06057e-06	4.13918e-06	3.69969e-06	3.41334e-06	4.41367e-06	4.08791e-06	2.47406e-06	5.31347e-06	3.26693e-06	5.16298e-06	3.02569e-06	4.95198e-06	3.02898e-06	4.57562e-06	2.58355e-06	4.53764e-06	3.75287e-06	4.29683e-06	3.34077e-06	2.92061e-06	2.61874e-06	5.9261e-06	4.91936e-06	3.24857e-06	4.25978e-06	3.74816e-06
	0.25	3.28983e-06	4.83911e-06	4.39175e-06	3.41925e-06	3.39585e-06	2.57589e-06	3.72739e-06	3.677e-06	2.93473e-06	4.00453e-06	5.26697e-06	4.83623e-06	3.95847e-06	3.11862e-06	5.92515e-06	5.8279e-06	3.53703e-06	4.97375e-06	3.70647e-06	4.50452e-06	3.71935e-06	4.92556e-06	4.19654e-06	6.32186e-06	3.7996e-06	4.07287e-06	4.48854e-06	4.29327e-06	2.52094e-06	5.78406e-06	3.31968e-06	8.09875e-06	3.0979e-06	5.08187e-06	3.09994e-06	4.7606e-06	2.76927e-06	4.83936e-06	3.85843e-06	4.40951e-06	3.36784e-06	3.16228e-06	2.71411e-06	6.74808e-06	5.09024e-06	3.34605e-06	4.3921e-06	3.81664e-06
	0.255	3.37811e-06	4.94068e-06	4.45891e-06	3.5535e-06	3.53859e-06	2.62272e-06	3.81275e-06	3.74743e-06	5.88262e-06	4.10944e-06	4.77538e-06	4.91929e-06	4.25063e-06	3.24999e-06	6.09503e-06	5.9653e-06	3.62322e-06	5.0983e-06	3.89436e-06	4.65831e-06	3.86314e-06	5.24722e-06	4.30244e-06	6.35462e-06	4.00233e-06	4.81192e-06	4.75078e-06	4.36772e-06	2.60072e-06	5.86607e-06	3.40806e-06	8.9679e-06	3.18564e-06	5.19513e-06	3.11501e-06	4.93385e-06	3.64548e-06	5.01115e-06	3.95278e-06	4.51956e-06	3.47946e-06	4.69575e-06	2.78716e-06	5.91929e-06	5.21409e-06	3.59168e-06	4.47495e-06	3.90084e-06
	0.26	3.58657e-06	5.07254e-06	4.59847e-06	3.64475e-06	3.63708e-06	2.8003e-06	3.90705e-06	3.81584e-06	6.52127e-06	4.24525e-06	5.33593e-06	5.13344e-06	4.37411e-06	3.32273e-06	6.25944e-06	6.1032e-06	3.6396e-06	5.19725e-06	3.9479e-06	4.78662e-06	3.99538e-06	5.38727e-06	4.3899e-06	5.06912e-06	4.00575e-06	4.31666e-06	5.57233e-06	4.50281e-06	2.626e-06	6.00423e-06	3.48817e-06	9.13366e-06	3.27175e-06	5.41582e-06	3.1767e-06	4.85955e-06	2.8945e-06	5.01074e-06	4.03553e-06	4.65396e-06	3.64045e-06	4.8071e-06	2.87048e-06	7.08618e-06	5.37063e-06	4.45777e-06	4.58811e-06	3.9762e-06
	0.265	4.62447e-06	5.18464e-06	4.7302e-06	3.72597e-06	4.90624e-06	2.8969e-06	3.98825e-06	3.90269e-06	7.05597e-06	4.21188e-06	5.38918e-06	5.21061e-06	4.51381e-06	3.33059e-06	6.44983e-06	6.2651e-06	3.36494e-06	5.35598e-06	4.04266e-06	4.92673e-06	4.12532e-06	5.52703e-06	4.51212e-06	5.14417e-06	3.86015e-06	5.04385e-06	5.41666e-06	4.66244e-06	2.69866e-06	6.23511e-06	3.59131e-06	8.55398e-06	3.3232e-06	5.49619e-06	3.25641e-06	5.17035e-06	2.84732e-06	5.18813e-06	4.1531e-06	4.79041e-06	3.78594e-06	4.92503e-06	2.91995e-06	8.63767e-06	5.53931e-06	5.68899e-06	4.72143e-06	4.11793e-06
	0.27	4.81533e-06	5.3032e-06	4.70796e-06	3.83173e-06	5.32393e-06	2.93344e-06	4.07537e-06	4.39421e-06	7.08788e-06	4.34072e-06	5.49062e-06	5.7281e-06	4.55132e-06	3.39909e-06	6.60402e-06	6.35569e-06	3.45605e-06	5.47162e-06	4.19371e-06	5.06237e-06	4.2772e-06	5.63963e-06	4.60559e-06	6.12395e-06	3.92258e-06	5.11249e-06	5.42647e-06	4.74319e-06	2.76419e-06	6.42954e-06	3.6675e-06	9.29033e-06	3.43405e-06	5.29904e-06	3.33551e-06	5.34699e-06	2.7057e-06	5.41458e-06	4.27278e-06	4.92246e-06	3.9126e-06	5.27602e-06	3.01756e-06	9.18059e-06	5.6868e-06	5.64676e-06	4.84461e-06	4.19256e-06
	0.275	4.91872e-06	5.42218e-06	4.85634e-06	3.94618e-06	5.41783e-06	2.95687e-06	4.16413e-06	4.83837e-06	6.98548e-06	4.56708e-06	5.37809e-06	5.49389e-06	4.59722e-06	3.49711e-06	6.78834e-06	6.50317e-06	3.50297e-06	5.58532e-06	4.22904e-06	5.20199e-06	4.38159e-06	5.7824e-06	4.69211e-06	6.15602e-06	3.99686e-06	4.25192e-06	5.52653e-06	4.96909e-06	2.84312e-06	6.60202e-06	3.75605e-06	9.1306e-06	3.53237e-06	5.39524e-06	3.59034e-06	5.43951e-06	2.69268e-06	4.99174e-06	4.38001e-06	5.03756e-06	4.88922e-06	6.36881e-06	3.02853e-06	9.44097e-06	5.85539e-06	5.87654e-06	5.12683e-06	4.23403e-06
	0.28	5.53286e-06	5.55515e-06	4.84324e-06	4.03151e-06	5.53229e-06	3.04496e-06	4.17521e-06	4.95662e-06	7.6034e-06	4.56039e-06	5.4967e-06	5.47864e-06	4.13624e-06	3.61182e-06	6.96964e-06	6.66086e-06	3.62528e-06	5.7107e-06	4.35571e-06	5.34245e-06	4.45751e-06	5.91185e-06	4.80897e-06	6.48315e-06	4.07734e-06	5.66032e-06	5.65743e-06	5.07568e-06	2.92846e-06	6.86619e-06	3.86033e-06	9.38946e-06	3.80492e-06	5.30281e-06	3.46644e-06	5.56665e-06	5.52667e-06	4.45871e-06	4.50427e-06	5.16789e-06	5.58392e-06	6.68399e-06	3.1177e-06	1.00723e-05	5.93299e-06	6.03654e-06	5.28683e-06	4.34949e-06
	0.285	5.37345e-06	5.70126e-06	5.15675e-06	4.11698e-06	5.6659e-06	3.17884e-06	4.34901e-06	5.09483e-06	7.76187e-06	4.71183e-06	5.5996e-06	5.59576e-06	4.69051e-06	3.70252e-06	7.15829e-06	6.80654e-06	3.67541e-06	5.83675e-06	4.47276e-06	5.46496e-06	4.58813e-06	6.03288e-06	4.88703e-06	6.48392e-06	4.19283e-06	5.45874e-06	5.79323e-06	5.25333e-06	2.98859e-06	7.08729e-06	3.92969e-06	1.033e-05	4.7344e-06	5.44703e-06	3.74259e-06	5.68473e-06	5.59334e-06	4.64211e-06	4.60556e-06	5.29108e-06	5.81735e-06	6.60241e-06	3.17838e-06	9.69261e-06	6.09452e-06	6.09508e-06	5.36474e-06	4.46773e-06
	0.29	5.45247e-06	5.77245e-06	5.26619e-06	4.22064e-06	5.73119e-06	3.15753e-06	4.44571e-06	5.1558e-06	7.95165e-06	4.7314e-06	5.72117e-06	5.76651e-06	4.86828e-06	3.78344e-06	7.30015e-06	6.92786e-06	3.75687e-06	5.98071e-06	4.55434e-06	5.61101e-06	4.66677e-06	6.15537e-06	4.98553e-06	6.69774e-06	4.22005e-06	7.16796e-06	5.92272e-06	5.3726e-06	3.052e-06	7.24668e-06	3.98875e-06	1.11565e-05	3.9474e-06	5.66607e-06	4.1761e-06	5.83029e-06	5.67661e-06	4.76576e-06	4.71691e-06	5.43157e-06	7.15828e-06	6.69516e-06	3.29977e-06	1.00386e-05	5.35328e-06	6.38208e-06	5.53112e-06	4.56215e-06
	0.295	5.29623e-06	5.89537e-06	5.33877e-06	4.31782e-06	5.91985e-06	3.26884e-06	4.6569e-06	5.26333e-06	8.31095e-06	4.7283e-06	5.84933e-06	6.17369e-06	5.00591e-06	3.87434e-06	7.35516e-06	7.06499e-06	3.85209e-06	5.98269e-06	4.78364e-06	5.58865e-06	4.79136e-06	5.98531e-06	5.11105e-06	6.54675e-06	3.05389e-06	6.07282e-06	6.05319e-06	5.48667e-06	3.13218e-06	7.38892e-06	4.09454e-06	1.11333e-05	4.07075e-06	5.78771e-06	3.75761e-06	5.96811e-06	5.80565e-06	4.92559e-06	4.85334e-06	5.56713e-06	6.8827e-06	6.82702e-06	3.40444e-06	1.09625e-05	4.54642e-06	6.78346e-06	5.70976e-06	4.49405e-06
	0.3	5.67932e-06	5.98781e-06	5.48938e-06	4.40471e-06	5.82928e-06	3.29064e-06	4.71539e-06	5.43603e-06	8.39993e-06	4.92433e-06	5.95079e-06	7.36588e-06	5.12315e-06	3.96546e-06	7.53278e-06	7.21058e-06	3.89718e-06	5.96882e-06	4.77535e-06	6.31467e-06	4.87946e-06	6.18341e-06	5.2002e-06	6.57612e-06	3.09842e-06	7.35006e-06	6.17828e-06	5.6404e-06	3.18958e-06	7.64505e-06	4.1906e-06	8.12924e-06	4.14659e-06	5.9158e-06	4.28146e-06	6.11668e-06	5.92279e-06	5.15992e-06	4.92484e-06	5.70327e-06	9.737e-06	6.97863e-06	3.39127e-06	9.6249e-06	4.04953e-06	6.71358e-06	5.94157e-06	4.58164e-06
	0.305	5.82251e-06	6.13195e-06	5.49851e-06	4.52198e-06	5.98122e-06	3.43673e-06	4.81637e-06	5.53208e-06	6.91136e-06	5.15909e-06	6.0693e-06	8.01562e-06	5.38635e-06	4.0658e-06	7.71102e-06	7.37987e-06	4.03187e-06	6.27982e-06	4.89482e-06	6.75492e-06	4.99152e-06	6.25989e-06	5.28161e-06	6.80042e-06	3.17855e-06	6.69367e-06	6.35342e-06	5.77979e-06	3.29157e-06	8.90331e-06	4.26422e-06	8.27324e-06	5.64936e-06	6.01531e-06	3.94953e-06	6.32323e-06	6.32109e-06	5.35743e-06	5.03055e-06	5.84921e-06	9.89767e-06	7.95359e-06	3.48255e-06	9.6904e-06	4.10982e-06	7.50491e-06	6.04338e-06	4.69541e-06
	0.31	6.0635e-06	6.22792e-06	5.57533e-06	4.63301e-06	6.0626e-06	3.4775e-06	5.38313e-06	5.58502e-06	6.18285e-06	5.22877e-06	6.18371e-06	8.09383e-06	5.52509e-06	4.13528e-06	8.72722e-06	7.51246e-06	3.62384e-06	6.79096e-06	4.98678e-06	6.92148e-06	5.09807e-06	6.41396e-06	5.38409e-06	6.96047e-06	3.31903e-06	6.54319e-06	6.41654e-06	5.87275e-06	3.35592e-06	8.60307e-06	4.3656e-06	1.20095e-05	7.1078e-06	6.13867e-06	4.23866e-06	6.38725e-06	6.2561e-06	5.45267e-06	5.12976e-06	6.0177e-06	1.00914e-05	7.57484e-06	3.55431e-06	9.92765e-06	3.92913e-06	7.62245e-06	6.22015e-06	4.82903e-06
	0.315	6.06286e-06	6.40109e-06	5.91018e-06	4.76047e-06	6.04574e-06	3.55692e-06	5.474e-06	5.70369e-06	6.28426e-06	5.77082e-06	6.30668e-06	7.38735e-06	5.65229e-06	4.58671e-06	1.11074e-05	7.63214e-06	3.68939e-06	6.93433e-06	5.13731e-06	7.09339e-06	5.2162e-06	6.51657e-06	5.47551e-06	7.07514e-06	3.38817e-06	7.57842e-06	6.57375e-06	6.03895e-06	3.43093e-06	6.76019e-06	4.45479e-06	1.22216e-05	6.60394e-06	6.23317e-06	8.98205e-06	6.9159e-06	7.18568e-06	5.78678e-06	5.23295e-06	6.17427e-06	1.03003e-05	7.96857e-06	3.63105e-06	1.01493e-05	1.07176e-05	7.80791e-06	6.526e-06	4.43017e-06
	0.32	6.27779e-06	6.5497e-06	5.87565e-06	4.86784e-06	6.02453e-06	3.59489e-06	5.54327e-06	5.89482e-06	6.40939e-06	7.11769e-06	6.41948e-06	7.3473e-06	5.78044e-06	5.58125e-06	1.13926e-05	7.78121e-06	3.70781e-06	7.2613e-06	5.30383e-06	7.27589e-06	5.32155e-06	6.5797e-06	5.5579e-06	7.20337e-06	3.39827e-06	7.34946e-06	6.70172e-06	6.16846e-06	3.52987e-06	6.03458e-06	4.57915e-06	1.24306e-05	7.04345e-06	6.36437e-06	5.32894e-06	6.60947e-06	7.33037e-06	4.81004e-06	5.35105e-06	6.26371e-06	1.05262e-05	8.12452e-06	3.72361e-06	8.9397e-06	1.11081e-05	7.93956e-06	6.91342e-06	4.50409e-06
	0.325	6.52488e-06	6.59832e-06	6.17038e-06	4.99246e-06	6.13398e-06	3.68751e-06	5.59105e-06	5.97023e-06	6.52251e-06	7.21384e-06	6.54854e-06	7.61219e-06	5.90639e-06	5.59144e-06	1.16644e-05	7.96033e-06	3.84193e-06	7.41967e-06	5.37251e-06	7.45371e-06	5.56827e-06	6.61523e-06	6.21088e-06	7.28e-06	3.57577e-06	8.39348e-06	6.7665e-06	6.29922e-06	3.63022e-06	6.13886e-06	4.66677e-06	1.13715e-05	7.02538e-06	6.5745e-06	5.43885e-06	6.82257e-06	8.15475e-06	4.85338e-06	5.46175e-06	6.03827e-06	1.07366e-05	8.70952e-06	3.85801e-06	7.9821e-06	6.4727e-06	8.16894e-06	6.9589e-06	4.63399e-06
	0.33	6.57982e-06	6.60007e-06	6.19347e-06	5.1154e-06	6.22947e-06	4.37529e-06	5.76994e-06	6.01013e-06	6.6331e-06	7.58577e-06	6.66221e-06	8.60716e-06	6.00707e-06	4.48123e-06	1.18171e-05	8.12974e-06	3.85286e-06	7.35651e-06	5.60932e-06	7.63836e-06	5.664e-06	6.78693e-06	6.20557e-06	7.35711e-06	3.76613e-06	8.72308e-06	6.90868e-06	6.31045e-06	3.70311e-06	6.23978e-06	4.75567e-06	1.15596e-05	7.17822e-06	6.69294e-06	5.75954e-06	7.71891e-06	9.45309e-06	4.97215e-06	5.60882e-06	6.18206e-06	1.09888e-05	8.74325e-06	3.93733e-06	8.17699e-06	9.3024e-06	8.39358e-06	6.34322e-06	5.00271e-06
	0.335	6.53529e-06	6.7163e-06	6.38633e-06	5.21491e-06	6.32677e-06	4.46521e-06	5.7857e-06	6.14206e-06	6.75118e-06	8.13496e-06	6.78886e-06	8.72934e-06	6.14873e-06	4.54664e-06	1.21059e-05	8.28784e-06	6.47377e-06	7.56096e-06	5.65476e-06	7.84871e-06	5.61832e-06	6.87961e-06	4.80501e-06	7.44775e-06	3.89107e-06	7.90708e-06	7.04713e-06	1.38154e-05	3.82861e-06	6.43739e-06	4.96796e-06	1.17619e-05	7.3141e-06	6.83913e-06	6.92497e-06	7.91058e-06	9.61073e-06	5.10687e-06	5.74685e-06	6.26715e-06	1.12222e-05	8.60769e-06	4.02702e-06	8.30651e-06	1.2038e-05	8.56537e-06	6.75318e-06	5.31919e-06
	0.34	6.69375e-06	6.97688e-06	6.50548e-06	5.31355e-06	6.48413e-06	4.58573e-06	5.86189e-06	6.30886e-06	6.87321e-06	8.36958e-06	6.91621e-06	8.89189e-06	6.28409e-06	4.64786e-06	1.22593e-05	8.42593e-06	8.16565e-06	7.66235e-06	5.65381e-06	7.8751e-06	5.74282e-06	7.00447e-06	4.90748e-06	7.56783e-06	3.91716e-06	9.53662e-06	7.17956e-06	1.75668e-05	3.90386e-06	6.57543e-06	5.54282e-06	1.1956e-05	7.42112e-06	7.56023e-06	9.343e-06	8.10083e-06	1.00973e-05	5.24842e-06	6.75259e-06	6.4006e-06	1.13865e-05	8.34182e-06	4.05765e-06	1.31297e-05	1.16493e-05	8.72725e-06	7.71134e-06	5.11411e-06
	0.345	6.88641e-06	7.10305e-06	6.59467e-06	5.27138e-06	6.59601e-06	5.40965e-06	5.95991e-06	6.42981e-06	6.98863e-06	8.1324e-06	7.04792e-06	8.9568e-06	6.40655e-06	4.73779e-06	1.2495e-05	8.58583e-06	8.38192e-06	7.95853e-06	5.84683e-06	7.85973e-06	5.86432e-06	7.13474e-06	5.01171e-06	7.69584e-06	4.62108e-06	9.91571e-06	7.39776e-06	1.53078e-05	3.986e-06	6.68182e-06	5.65763e-06	1.21604e-05	7.53355e-06	7.69043e-06	1.00249e-05	8.33996e-06	1.20407e-05	5.35592e-06	7.5092e-06	6.55155e-06	1.14964e-05	8.51732e-06	4.19363e-06	1.33443e-05	1.18318e-05	8.85969e-06	7.98413e-06	5.35491e-06
	0.35	7.11542e-06	7.2425e-06	6.76344e-06	5.91114e-06	6.89711e-06	5.49609e-06	6.08134e-06	6.49732e-06	7.02734e-06	7.81587e-06	7.3215e-06	9.17216e-06	6.5279e-06	4.81374e-06	1.26271e-05	8.76172e-06	8.62716e-06	8.12576e-06	6.05424e-06	8.06374e-06	5.98414e-06	7.282e-06	5.12412e-06	7.83786e-06	4.77139e-06	9.55079e-06	7.43359e-06	1.53799e-05	4.04014e-06	6.83277e-06	5.77101e-06	1.23591e-05	7.7366e-06	7.84091e-06	1.01839e-05	8.50511e-06	1.22429e-05	5.53495e-06	5.70091e-06	6.59104e-06	1.17998e-05	8.66738e-06	4.43545e-06	1.35695e-05	1.1675e-05	9.04271e-06	8.15455e-06	5.3641e-06
	0.355	7.23295e-06	7.39173e-06	6.87129e-06	5.63384e-06	6.989e-06	5.65262e-06	6.11854e-06	6.56664e-06	7.10968e-06	7.83954e-06	7.589e-06	8.81604e-06	6.674e-06	4.96614e-06	1.28407e-05	8.90098e-06	8.11195e-06	8.27224e-06	6.04852e-06	8.26183e-06	6.10191e-06	7.40215e-06	5.23581e-06	7.95988e-06	4.92908e-06	9.8437e-06	7.63907e-06	1.66671e-05	4.17432e-06	6.97697e-06	5.8831e-06	1.25699e-05	7.71309e-06	8.03893e-06	1.0065e-05	9.28749e-06	1.24516e-05	5.67469e-06	5.82389e-06	6.32085e-06	1.32808e-05	8.80291e-06	4.82524e-06	1.37497e-05	1.36564e-05	9.17987e-06	8.29022e-06	5.25761e-06
	0.36	6.75196e-06	7.55739e-06	6.48252e-06	5.62094e-06	7.21694e-06	5.78657e-06	6.28332e-06	4.23514e-06	7.08389e-06	6.54276e-06	1.34424e-05	8.84079e-06	7.02497e-06	4.96706e-06	1.2935e-05	9.0766e-06	6.9851e-06	8.49819e-06	6.24031e-06	8.80922e-06	6.21199e-06	7.54241e-06	5.81763e-06	8.04726e-06	4.96017e-06	1.01526e-05	7.84952e-06	1.67688e-05	4.2478e-06	7.10363e-06	5.56828e-06	1.27579e-05	7.93761e-06	8.2602e-06	1.01863e-05	9.55114e-06	1.2671e-05	5.81434e-06	5.97459e-06	6.60019e-06	1.27422e-05	9.09991e-06	4.90903e-06	1.39401e-05	1.39608e-05	9.35731e-06	8.41038e-06	5.40268e-06
	0.365	7.56449e-06	7.73979e-06	6.60361e-06	5.74801e-06	7.24485e-06	5.91264e-06	6.48883e-06	6.42782e-06	7.65173e-06	6.74171e-06	1.48623e-05	8.97718e-06	7.78764e-06	5.04591e-06	1.31065e-05	9.28317e-06	9.408e-06	8.6493e-06	6.28405e-06	9.7312e-06	6.2913e-06	7.66213e-06	5.7808e-06	8.19919e-06	5.04421e-06	1.03903e-05	8.34472e-06	1.70251e-05	4.34084e-06	7.39428e-06	6.02101e-06	1.29513e-05	8.14269e-06	8.39196e-06	1.03724e-05	9.74104e-06	1.2885e-05	5.9972e-06	5.96611e-06	6.73867e-06	1.29912e-05	9.31213e-06	5.00827e-06	1.353e-05	1.40185e-05	9.44119e-06	8.49193e-06	5.50767e-06
	0.37	7.36954e-06	7.82935e-06	6.78459e-06	5.82354e-06	7.37866e-06	6.04167e-06	6.77613e-06	6.45124e-06	9.39328e-06	1.01402e-05	1.5041e-05	9.12474e-06	7.94182e-06	5.15555e-06	1.33243e-05	9.46636e-06	9.61368e-06	8.79084e-06	8.70346e-06	1.77627e-05	1.2124e-05	7.77047e-06	5.90887e-06	8.29747e-06	5.23795e-06	1.07546e-05	8.46776e-06	1.72932e-05	4.41575e-06	7.60715e-06	8.7233e-06	1.31519e-05	8.23991e-06	8.61345e-06	1.06426e-05	8.98209e-06	1.30605e-05	6.13366e-06	5.82774e-06	6.84881e-06	1.26883e-05	9.39189e-06	5.09308e-06	1.3777e-05	1.40202e-05	9.63431e-06	8.59823e-06	5.4305e-06
	0.375	7.52876e-06	8.00865e-06	6.84907e-06	5.9227e-06	7.50175e-06	6.33879e-06	8.34198e-06	7.70525e-06	9.02732e-06	9.73794e-06	1.54162e-05	9.26638e-06	8.08744e-06	5.31479e-06	1.33431e-05	9.63693e-06	9.48006e-06	8.93222e-06	9.6588e-06	1.89889e-05	1.2204e-05	7.88864e-06	6.00978e-06	8.42782e-06	5.73828e-06	1.0788e-05	8.54233e-06	1.75787e-05	4.53488e-06	7.81427e-06	9.044e-06	1.3582e-05	8.09931e-06	8.68128e-06	1.06682e-05	8.72843e-06	1.13843e-05	6.25109e-06	6.94088e-06	6.99674e-06	1.12882e-05	9.59434e-06	5.19727e-06	1.35187e-05	1.58718e-05	9.79432e-06	8.59993e-06	5.54202e-06
	0.38	7.75675e-06	8.09311e-06	6.97266e-06	6.04204e-06	7.91429e-06	6.98352e-06	8.4076e-06	9.1153e-06	9.11725e-06	1.03861e-05	1.56672e-05	9.40828e-06	8.25714e-06	5.43958e-06	1.37769e-05	9.80355e-06	7.88034e-06	9.12415e-06	9.72898e-06	1.96995e-05	1.19886e-05	8.01595e-06	6.10947e-06	8.54367e-06	5.82201e-06	1.12932e-05	5.35229e-06	1.7836e-05	4.5675e-06	8.00566e-06	9.13061e-06	1.38611e-05	8.25578e-06	8.86404e-06	1.088e-05	8.77909e-06	1.19532e-05	6.41517e-06	6.029e-06	7.15451e-06	1.15294e-05	9.5169e-06	5.33355e-06	1.37249e-05	1.67921e-05	9.93768e-06	8.76898e-06	1.95115e-05
	0.385	7.83855e-06	8.24466e-06	6.96858e-06	6.11035e-06	8.15212e-06	7.09025e-06	8.5882e-06	9.08689e-06	1.23015e-05	1.00715e-05	1.59518e-05	9.55743e-06	1.27851e-05	5.54461e-06	1.40096e-05	9.96262e-06	7.98487e-06	9.01432e-06	9.47331e-06	2.02169e-05	1.06081e-05	8.12844e-06	6.2264e-06	8.62825e-06	5.86812e-06	1.19431e-05	5.44124e-06	1.81067e-05	4.64161e-06	8.1446e-06	9.27473e-06	1.39922e-05	8.4192e-06	8.83e-06	9.39851e-06	9.20493e-06	1.21795e-05	1.1086e-05	7.21974e-06	7.28639e-06	1.16994e-05	9.8731e-06	6.15042e-06	1.39349e-05	1.71434e-05	1.00598e-05	8.90444e-06	1.97969e-05
	0.39	7.95438e-06	8.4154e-06	7.03276e-06	6.25797e-06	1.63682e-05	7.27763e-06	8.70306e-06	9.01194e-06	1.27125e-05	9.9512e-06	1.6162e-05	9.70219e-06	1.24139e-05	5.63404e-06	1.41948e-05	1.01489e-05	8.01709e-06	1.04199e-05	1.01856e-05	2.15545e-05	8.86347e-06	8.24024e-06	6.33408e-06	8.7569e-06	5.97283e-06	1.22307e-05	5.53546e-06	1.84348e-05	4.78857e-06	8.32425e-06	9.41617e-06	1.42084e-05	8.68062e-06	9.06732e-06	8.64956e-06	8.83763e-06	1.23866e-05	1.10973e-05	7.32799e-06	7.40912e-06	1.22633e-05	1.00607e-05	7.64899e-06	1.38978e-05	1.70412e-05	9.3731e-06	9.04856e-06	1.99531e-05
	0.395	7.21369e-06	8.58589e-06	7.16617e-06	6.15758e-06	1.61791e-05	7.43436e-06	8.87705e-06	8.59381e-06	1.25887e-05	1.0036e-05	1.62993e-05	9.85936e-06	1.45776e-05	5.64533e-06	1.44099e-05	1.03298e-05	8.63943e-06	1.04958e-05	9.84922e-06	2.18191e-05	8.87615e-06	8.40246e-06	6.44316e-06	8.8728e-06	6.07545e-06	1.25596e-05	5.66386e-06	1.85725e-05	4.86291e-06	8.32661e-06	9.57213e-06	1.44136e-05	8.84849e-06	9.20915e-06	8.8518e-06	9.05157e-06	1.25795e-05	1.11707e-05	7.57917e-06	7.6413e-06	1.21769e-05	1.02742e-05	8.35133e-06	1.42319e-05	1.74894e-05	9.51743e-06	9.1841e-06	1.93896e-05
	0.4	7.21427e-06	8.7512e-06	7.34727e-06	6.25977e-06	1.64479e-05	7.63377e-06	9.02847e-06	6.33013e-06	1.40201e-05	9.82644e-06	1.98245e-05	9.98286e-06	1.44887e-05	5.7344e-06	1.45583e-05	1.04753e-05	9.56547e-06	1.02408e-05	9.88854e-06	2.2109e-05	9.02493e-06	8.59837e-06	6.56206e-06	9.00388e-06	6.13002e-06	1.27042e-05	5.23961e-06	1.90059e-05	5.13622e-06	8.34013e-06	9.7214e-06	1.45872e-05	8.92229e-06	1.09346e-05	8.9273e-06	9.26069e-06	1.27723e-05	1.13513e-05	9.11374e-06	7.77242e-06	1.23695e-05	1.04526e-05	8.6463e-06	1.45894e-05	1.79609e-05	9.64683e-06	9.21234e-06	1.91406e-05
	0.405	7.38605e-06	8.89995e-06	7.4241e-06	6.36416e-06	1.75752e-05	7.82178e-06	9.18695e-06	6.46489e-06	1.37943e-05	9.821e-06	2.06689e-05	1.0114e-05	1.37336e-05	5.85006e-06	1.46753e-05	1.06292e-05	9.87643e-06	1.03907e-05	1.02303e-05	2.23724e-05	9.17462e-06	8.80808e-06	6.66064e-06	9.08348e-06	6.27369e-06	1.32391e-05	5.32789e-06	1.9202e-05	5.4794e-06	8.53773e-06	9.90527e-06	1.45515e-05	9.09802e-06	1.11238e-05	9.06973e-06	9.40603e-06	1.30212e-05	1.14959e-05	8.05404e-06	7.93889e-06	1.25903e-05	1.7734e-05	8.3208e-06	1.48097e-05	1.76315e-05	9.79192e-06	9.30426e-06	1.96482e-05
	0.41	1.52497e-05	8.99846e-06	7.59757e-06	6.4396e-06	1.94697e-05	8.08225e-06	9.3301e-06	6.16587e-06	1.4327e-05	9.8539e-06	2.12456e-05	1.02639e-05	1.34025e-05	5.93704e-06	1.35291e-05	1.07935e-05	9.78769e-06	1.24065e-05	1.04609e-05	2.27688e-05	9.33821e-06	8.96987e-06	6.79156e-06	9.17436e-06	6.23538e-06	1.13877e-05	5.45974e-06	1.95838e-05	5.57224e-06	8.74348e-06	1.0068e-05	1.4738e-05	9.29486e-06	1.13873e-05	9.59773e-06	9.59673e-06	1.39723e-05	1.16648e-05	6.65805e-06	8.07432e-06	1.28863e-05	2.89123e-05	8.653e-06	1.49725e-05	1.81087e-05	9.94314e-06	1.12181e-05	2.19424e-05
	0.415	2.3379e-05	9.15404e-06	7.89059e-06	6.54459e-06	1.84623e-05	8.18921e-06	1.01718e-05	5.92827e-06	2.4993e-05	1.0027e-05	2.05664e-05	1.04124e-05	1.13161e-05	6.05501e-06	1.51071e-05	1.09581e-05	1.00763e-05	1.28785e-05	1.07825e-05	1.90071e-05	9.48574e-06	9.09086e-06	6.91562e-06	9.28913e-06	6.6218e-06	9.3743e-06	6.36386e-06	1.99629e-05	5.80527e-06	8.8753e-06	1.02206e-05	1.48649e-05	1.00058e-05	1.16036e-05	7.50648e-06	9.92079e-06	1.69639e-05	1.18239e-05	8.5991e-06	8.24399e-06	1.30164e-05	2.68149e-05	8.9349e-06	1.5045e-05	1.78103e-05	1.28356e-05	1.11877e-05	2.312e-05
	0.42	2.44691e-05	1.28949e-05	7.9927e-06	6.73041e-06	2.18566e-05	8.34796e-06	8.86264e-06	6.55976e-06	1.50121e-05	1.02156e-05	2.02235e-05	1.05815e-05	1.17574e-05	6.66949e-06	1.76187e-05	1.11124e-05	1.02749e-05	1.30779e-05	1.08727e-05	1.17975e-05	9.66765e-06	9.2212e-06	7.01837e-06	9.43038e-06	6.74521e-06	9.61329e-06	6.78215e-06	2.00909e-05	1.23851e-05	9.08765e-06	1.03895e-05	1.49388e-05	1.02703e-05	1.19158e-05	7.6704e-06	1.00436e-05	1.72041e-05	1.20016e-05	7.2719e-06	8.38078e-06	1.32276e-05	2.70886e-05	8.9265e-06	1.54977e-05	1.91879e-05	1.32888e-05	1.26087e-05	2.47042e-05
	0.425	1.96498e-05	1.40446e-05	8.74212e-06	7.88789e-06	2.17766e-05	8.57369e-06	8.84655e-06	6.31669e-06	2.38937e-05	1.04592e-05	2.08635e-05	1.07376e-05	1.1914e-05	8.18924e-06	1.95092e-05	1.1295e-05	1.04394e-05	1.32835e-05	1.10372e-05	1.72113e-05	9.92491e-06	9.37991e-06	7.1466e-06	9.56391e-06	6.86734e-06	1.03001e-05	6.89711e-06	2.02129e-05	1.26722e-05	9.27679e-06	1.85123e-05	1.37418e-05	1.04179e-05	1.21647e-05	7.88056e-06	1.01038e-05	1.74632e-05	1.21655e-05	7.42327e-06	8.52699e-06	1.37205e-05	2.77253e-05	9.646e-06	1.56638e-05	1.93996e-05	1.34736e-05	1.1597e-05	2.33791e-05
	0.43	1.96957e-05	1.43069e-05	8.98593e-06	8.96823e-06	2.12203e-05	8.72318e-06	9.0739e-06	6.4262e-06	1.54713e-05	1.06345e-05	2.108e-05	1.08773e-05	1.18868e-05	8.29901e-06	1.7821e-05	1.14961e-05	1.07366e-05	1.66293e-05	1.1066e-05	2.19723e-05	1.01042e-05	9.48359e-06	7.26525e-06	9.68618e-06	6.81713e-06	1.37005e-05	6.9753e-06	2.06823e-05	1.29213e-05	9.4062e-06	1.91949e-05	1.37612e-05	1.05867e-05	1.23352e-05	1.88234e-05	9.13598e-06	1.73842e-05	1.23463e-05	1.53577e-05	8.68695e-06	1.44007e-05	2.00243e-05	9.656e-06	1.58719e-05	1.9655e-05	1.38771e-05	1.1884e-05	2.26814e-05
	0.435	1.94875e-05	1.46845e-05	9.03164e-06	8.7e-06	2.36258e-05	8.90189e-06	9.27957e-06	6.52679e-06	1.48559e-05	1.09593e-05	2.14515e-05	1.12056e-05	1.22887e-05	8.39073e-06	1.7695e-05	1.16866e-05	1.10731e-05	1.67427e-05	1.12507e-05	2.2026e-05	1.02591e-05	9.61688e-06	7.34799e-06	9.78679e-06	7.13248e-06	1.44639e-05	7.09475e-06	2.07266e-05	1.32261e-05	9.54961e-06	1.94802e-05	1.45102e-05	1.08144e-05	1.25702e-05	1.452e-05	9.76865e-06	1.95649e-05	1.25083e-05	1.69421e-05	8.80516e-06	1.46482e-05	1.81728e-05	9.3564e-06	1.60379e-05	1.99316e-05	1.36417e-05	1.21577e-05	2.33896e-05
	0.44	2.63891e-05	1.50527e-05	9.17205e-06	1.76274e-05	2.53823e-05	8.95491e-06	1.91611e-05	6.62046e-06	1.7789e-05	1.10256e-05	2.18241e-05	1.13512e-05	1.24603e-05	8.63907e-06	1.81608e-05	1.31923e-05	1.27087e-05	1.47669e-05	1.66353e-05	2.03362e-05	1.18076e-05	9.87684e-06	7.53497e-06	9.92378e-06	7.0616e-06	1.50973e-05	7.19184e-06	1.72595e-05	1.34779e-05	9.69404e-06	1.9837e-05	1.38355e-05	1.10509e-05	1.27837e-05	1.76349e-05	9.08795e-06	1.99137e-05	1.26994e-05	1.60521e-05	8.98136e-06	1.46758e-05	1.61347e-05	9.4941e-06	1.62575e-05	2.01855e-05	1.38437e-05	1.2657e-05	2.27652e-05
	0.445	2.61858e-05	1.35142e-05	9.2005e-06	1.81816e-05	2.49997e-05	9.05719e-06	1.60021e-05	7.0831e-06	2.22916e-05	1.17734e-05	2.15908e-05	1.15392e-05	1.25757e-05	1.30773e-05	1.84406e-05	1.06065e-05	1.11116e-05	1.44681e-05	1.67614e-05	1.86922e-05	1.23167e-05	1.01715e-05	7.3062e-06	1.00582e-05	7.15155e-06	1.25268e-05	7.3389e-06	1.71771e-05	1.34627e-05	9.86398e-06	2.00128e-05	1.67265e-05	1.12247e-05	1.30895e-05	1.76728e-05	8.34429e-06	1.85166e-05	1.29299e-05	1.62513e-05	9.1215e-06	1.4915e-05	2.14715e-05	9.9612e-06	1.68058e-05	1.92656e-05	2.33734e-05	1.26666e-05	2.23477e-05
	0.45	2.63794e-05	1.3111e-05	9.42832e-06	1.86979e-05	2.60786e-05	9.17287e-06	1.42456e-05	6.77215e-06	2.36002e-05	1.15036e-05	2.1307e-05	1.1723e-05	1.26374e-05	1.43434e-05	1.87433e-05	9.4374e-06	8.0616e-06	1.46819e-05	1.69831e-05	1.89935e-05	1.16856e-05	1.031e-05	7.19381e-06	1.02179e-05	7.39806e-06	1.14478e-05	7.98918e-06	1.74517e-05	1.37046e-05	9.85001e-06	2.00842e-05	1.42448e-05	1.13921e-05	1.32923e-05	1.8299e-05	8.32182e-06	1.89459e-05	1.20985e-05	1.64639e-05	9.31692e-06	1.51505e-05	2.24983e-05	9.773e-06	1.36642e-05	1.81656e-05	2.82762e-05	1.31068e-05	2.30124e-05
	0.455	2.506e-05	1.2783e-05	9.67012e-06	1.90252e-05	2.76215e-05	9.39738e-06	1.29937e-05	6.955e-06	2.53831e-05	1.15023e-05	2.15688e-05	1.18561e-05	1.28287e-05	1.45116e-05	1.90591e-05	9.54144e-06	8.15579e-06	1.49402e-05	1.72205e-05	1.92293e-05	1.17972e-05	1.05224e-05	6.96067e-06	1.45718e-05	7.40384e-06	1.16193e-05	1.37223e-05	1.7636e-05	1.38618e-05	1.17217e-05	2.03124e-05	1.40558e-05	1.13979e-05	1.33936e-05	1.68865e-05	8.40722e-06	1.92673e-05	1.2119e-05	2.35411e-05	9.46242e-06	1.55461e-05	2.38539e-05	1.29226e-05	1.39356e-05	1.51244e-05	2.46791e-05	1.3338e-05	2.34776e-05
	0.46	2.61957e-05	1.53791e-05	9.67919e-06	1.80366e-05	2.61614e-05	9.20546e-06	1.32199e-05	7.42579e-06	2.33834e-05	1.1825e-05	2.18295e-05	1.20529e-05	1.29864e-05	1.4717e-05	1.94135e-05	9.97276e-06	8.28228e-06	1.51737e-05	1.74355e-05	1.94931e-05	1.16072e-05	1.7643e-05	7.20353e-06	1.35497e-05	7.52867e-06	1.228e-05	1.38888e-05	1.80639e-05	1.37704e-05	1.42836e-05	1.64936e-05	1.43794e-05	1.13786e-05	1.3344e-05	1.68547e-05	8.56402e-06	1.95325e-05	1.1342e-05	2.53416e-05	9.6152e-06	1.60258e-05	2.68941e-05	1.62625e-05	1.69355e-05	1.50564e-05	2.56022e-05	1.35572e-05	2.38911e-05
	0.465	2.12011e-05	2.17644e-05	1.43727e-05	1.81265e-05	2.63555e-05	9.21913e-06	1.34159e-05	9.87437e-06	2.37068e-05	1.191e-05	2.21509e-05	1.22022e-05	1.31433e-05	1.47778e-05	1.9414e-05	9.55653e-06	8.44544e-06	1.53897e-05	1.76849e-05	1.9676e-05	1.17891e-05	1.78569e-05	7.32238e-06	1.343e-05	7.37762e-06	1.23327e-05	1.35238e-05	1.84418e-05	1.39439e-05	3.35204e-05	1.58006e-05	1.44787e-05	1.1539e-05	1.32647e-05	1.65649e-05	8.4379e-06	1.97779e-05	1.30207e-05	2.48898e-05	9.77107e-06	1.60205e-05	3.12729e-05	1.88232e-05	1.78951e-05	1.55202e-05	2.61752e-05	1.38315e-05	2.41966e-05
	0.47	2.43925e-05	2.20432e-05	1.54949e-05	1.83039e-05	2.66698e-05	9.40191e-06	1.36169e-05	1.15932e-05	2.37365e-05	1.20875e-05	2.21122e-05	1.24553e-05	1.0954e-05	1.36245e-05	1.96173e-05	1.65425e-05	8.36577e-06	1.56555e-05	1.80003e-05	1.98496e-05	1.2109e-05	1.79822e-05	7.47495e-06	1.3717e-05	7.55711e-06	1.25418e-05	1.35196e-05	1.87179e-05	1.52266e-05	3.86578e-05	1.59446e-05	1.46376e-05	1.16813e-05	1.38247e-05	1.68114e-05	1.02899e-05	2.0056e-05	1.28814e-05	2.53696e-05	9.9455e-06	1.62242e-05	3.1436e-05	2.10098e-05	1.77144e-05	1.60961e-05	2.65012e-05	1.38963e-05	2.41535e-05
	0.475	2.48047e-05	2.23174e-05	1.43564e-05	1.84733e-05	2.70289e-05	9.65368e-06	1.38512e-05	1.16098e-05	2.40709e-05	1.22987e-05	2.23846e-05	1.32766e-05	1.37378e-05	1.38767e-05	1.97654e-05	1.68605e-05	8.53827e-06	1.59313e-05	1.82367e-05	2.16658e-05	1.30736e-05	1.81748e-05	8.96232e-06	1.39521e-05	7.7536e-06	1.91888e-05	1.3745e-05	1.88647e-05	2.0515e-05	3.42237e-05	1.59566e-05	1.55549e-05	1.18301e-05	1.47849e-05	1.70763e-05	1.0554e-05	2.03328e-05	1.18812e-05	2.4725e-05	1.00786e-05	1.62595e-05	3.08846e-05	2.09047e-05	1.69785e-05	1.84954e-05	2.68497e-05	1.42667e-05	2.64965e-05
	0.48	2.50444e-05	2.26049e-05	1.41297e-05	1.83726e-05	2.71987e-05	1.07033e-05	1.39789e-05	1.8077e-05	2.45047e-05	1.23814e-05	2.25865e-05	1.81617e-05	2.26469e-05	1.68422e-05	2.00001e-05	1.82017e-05	8.55861e-06	1.6166e-05	1.84414e-05	2.15765e-05	1.36823e-05	1.8411e-05	9.38121e-06	1.43088e-05	1.03063e-05	2.12011e-05	1.38787e-05	1.87784e-05	2.09046e-05	3.115e-05	1.58771e-05	1.55693e-05	1.20085e-05	1.55997e-05	1.90696e-05	1.13579e-05	2.05733e-05	1.1924e-05	2.31817e-05	1.01748e-05	1.63788e-05	3.11072e-05	2.08086e-05	1.70016e-05	1.36468e-05	2.71799e-05	1.45571e-05	2.75723e-05
	0.485	2.53634e-05	2.3009e-05	1.41028e-05	1.88245e-05	2.75658e-05	1.1019e-05	1.42056e-05	1.82298e-05	2.31069e-05	1.26334e-05	2.30035e-05	1.83445e-05	2.32249e-05	1.82858e-05	1.61239e-05	1.89339e-05	1.22683e-05	1.63834e-05	1.88271e-05	2.1177e-05	1.39461e-05	1.86295e-05	9.4566e-06	1.45545e-05	1.03832e-05	1.96563e-05	1.47383e-05	2.02936e-05	2.10864e-05	3.3795e-05	1.36992e-05	1.60226e-05	1.22044e-05	1.56908e-05	1.86659e-05	1.12961e-05	2.08351e-05	8.97199e-06	2.36973e-05	1.05413e-05	1.65631e-05	3.15911e-05	2.17184e-05	1.72371e-05	1.27198e-05	2.73922e-05	1.48155e-05	2.79963e-05
	0.49	2.56459e-05	2.32925e-05	1.45468e-05	1.89993e-05	2.79849e-05	1.08421e-05	1.43894e-05	1.80664e-05	2.34834e-05	1.29432e-05	2.31903e-05	1.85402e-05	1.70377e-05	1.83556e-05	1.82094e-05	1.82441e-05	1.24176e-05	1.66737e-05	1.90829e-05	1.86202e-05	1.43288e-05	1.8852e-05	9.6036e-06	1.47482e-05	1.06494e-05	1.69733e-05	1.43045e-05	2.08907e-05	2.13852e-05	3.07013e-05	1.43646e-05	1.62499e-05	1.24962e-05	1.26778e-05	1.81829e-05	1.12908e-05	2.10636e-05	9.02269e-06	2.49315e-05	1.11486e-05	1.6898e-05	3.32232e-05	2.29747e-05	1.85427e-05	1.31227e-05	2.79421e-05	1.54004e-05	2.87654e-05
	0.495	2.77082e-05	2.35126e-05	1.81589e-05	1.83025e-05	2.81411e-05	1.27358e-05	1.45468e-05	1.76491e-05	2.3826e-05	1.33202e-05	2.26889e-05	1.88625e-05	1.35312e-05	3.30098e-05	1.70976e-05	1.79133e-05	1.27754e-05	1.69314e-05	1.93543e-05	2.0274e-05	1.43433e-05	1.90901e-05	9.75215e-06	1.47736e-05	1.08329e-05	1.7945e-05	1.46069e-05	2.24086e-05	2.18862e-05	2.91534e-05	1.39342e-05	1.63287e-05	1.28353e-05	1.27472e-05	1.85361e-05	1.19017e-05	2.12975e-05	1.28333e-05	3.05402e-05	1.13422e-05	1.713e-05	2.21457e-05	2.40255e-05	1.92168e-05	1.28869e-05	2.8196e-05	1.623e-05	2.90285e-05
	0.5	2.85612e-05	2.38618e-05	1.88378e-05	2.28442e-05	2.84042e-05	1.4449e-05	1.47975e-05	1.73517e-05	2.4126e-05	1.42383e-05	2.34938e-05	1.8926e-05	1.36378e-05	2.77947e-05	1.68466e-05	1.8632e-05	1.27609e-05	1.73038e-05	1.9601e-05	2.24032e-05	1.47979e-05	1.93274e-05	1.3701e-05	1.50363e-05	1.09549e-05	1.8252e-05	1.48211e-05	2.23587e-05	2.22313e-05	2.96893e-05	1.42349e-05	1.66248e-05	1.3265e-05	1.06052e-05	1.98908e-05	1.16719e-05	2.18533e-05	1.29534e-05	2.72509e-05	1.15153e-05	1.7282e-05	2.35955e-05	1.96986e-05	2.01431e-05	1.30896e-05	2.85145e-05	1.64875e-05	2.95287e-05
	0.505	2.94303e-05	2.35098e-05	2.76698e-05	2.257e-05	3.39667e-05	1.12428e-05	1.50309e-05	1.82484e-05	2.89499e-05	1.47479e-05	2.40804e-05	1.9259e-05	1.5963e-05	2.67726e-05	1.57796e-05	1.89192e-05	1.21218e-05	1.73577e-05	1.98801e-05	2.47891e-05	1.57124e-05	1.86219e-05	1.36536e-05	1.53349e-05	1.11366e-05	1.83215e-05	1.54479e-05	2.75136e-05	2.22835e-05	3.03618e-05	1.44598e-05	1.68032e-05	1.32106e-05	1.08498e-05	1.99781e-05	1.22776e-05	2.10615e-05	1.29632e-05	2.75941e-05	1.16817e-05	1.75106e-05	2.39636e-05	1.98922e-05	1.99864e-05	1.43107e-05	2.8872e-05	1.67057e-05	2.91479e-05
	0.51	2.9678e-05	2.37528e-05	3.37414e-05	2.2896e-05	3.39218e-05	1.14377e-05	1.52355e-05	2.60252e-05	3.71251e-05	1.55418e-05	2.40282e-05	1.98533e-05	3.52294e-05	2.70105e-05	1.89751e-05	1.95027e-05	2.46198e-05	1.76764e-05	2.01486e-05	2.50702e-05	1.64876e-05	1.46079e-05	1.41757e-05	1.56231e-05	1.12605e-05	1.86845e-05	1.61303e-05	3.82368e-05	2.26947e-05	3.05099e-05	1.46941e-05	1.6949e-05	1.29578e-05	1.1092e-05	2.04814e-05	1.25826e-05	1.94581e-05	1.32439e-05	2.79026e-05	1.18613e-05	1.78316e-05	2.67055e-05	1.98141e-05	1.98425e-05	1.46709e-05	2.9143e-05	1.7279e-05	4.8504e-05
	0.515	2.94597e-05	2.40564e-05	3.13979e-05	2.25194e-05	3.40289e-05	1.16378e-05	1.53297e-05	2.64944e-05	3.79474e-05	1.48786e-05	2.25437e-05	1.60311e-05	3.66293e-05	2.72498e-05	2.91834e-05	1.97076e-05	2.59049e-05	1.92958e-05	2.05302e-05	2.19679e-05	1.61434e-05	1.47845e-05	1.42107e-05	1.58576e-05	1.14077e-05	1.89802e-05	1.80821e-05	4.62366e-05	1.91014e-05	3.14204e-05	1.48489e-05	1.73049e-05	1.28024e-05	1.12769e-05	2.0382e-05	1.29505e-05	1.96791e-05	1.34479e-05	2.82147e-05	1.20674e-05	1.8117e-05	2.62796e-05	2.19375e-05	1.98321e-05	1.58024e-05	2.93614e-05	2.17943e-05	4.96238e-05
	0.52	3.01419e-05	2.43688e-05	3.52429e-05	2.13848e-05	3.44395e-05	1.18064e-05	1.55903e-05	2.59509e-05	3.82937e-05	1.49228e-05	2.1078e-05	1.49723e-05	3.82915e-05	2.98977e-05	2.76976e-05	1.99897e-05	2.70843e-05	1.92438e-05	2.07924e-05	2.20805e-05	2.03941e-05	1.49713e-05	1.34673e-05	1.61814e-05	1.14249e-05	1.93339e-05	1.84109e-05	4.56101e-05	1.56594e-05	3.21432e-05	1.5068e-05	1.70516e-05	2.25902e-05	1.11268e-05	2.11881e-05	1.30404e-05	1.99256e-05	1.38115e-05	3.23161e-05	1.22221e-05	1.83265e-05	3.66684e-05	2.63817e-05	2.01345e-05	1.609e-05	2.97197e-05	3.88879e-05	4.96141e-05
	0.525	3.38048e-05	2.45144e-05	3.83003e-05	2.15809e-05	3.50983e-05	1.19939e-05	1.60006e-05	3.01583e-05	3.63082e-05	1.51168e-05	2.1833e-05	1.5164e-05	3.97411e-05	3.20323e-05	2.95336e-05	1.99029e-05	2.73788e-05	1.93961e-05	2.13554e-05	2.23943e-05	2.47113e-05	1.44714e-05	1.39604e-05	1.65398e-05	2.51272e-05	1.96329e-05	1.93463e-05	4.57974e-05	1.47266e-05	3.26419e-05	1.53398e-05	1.72285e-05	2.3152e-05	1.12994e-05	2.18993e-05	1.30665e-05	2.0114e-05	1.39219e-05	3.19786e-05	1.23199e-05	1.86044e-05	3.53409e-05	3.25835e-05	2.07746e-05	1.64013e-05	3.02235e-05	4.31947e-05	5.24107e-05
	0.53	3.42012e-05	2.48672e-05	3.77363e-05	2.12428e-05	3.56409e-05	1.21869e-05	1.64486e-05	2.99174e-05	3.83174e-05	1.53466e-05	2.31192e-05	1.42833e-05	3.92796e-05	3.07274e-05	2.95904e-05	2.0307e-05	3.77014e-05	1.94944e-05	2.19162e-05	2.26036e-05	2.602e-05	1.48245e-05	3.31548e-05	1.68527e-05	2.74859e-05	1.98371e-05	2.02077e-05	4.39814e-05	1.41381e-05	3.21182e-05	2.58561e-05	2.0663e-05	2.32699e-05	1.15771e-05	2.15996e-05	1.25092e-05	2.03958e-05	1.41924e-05	3.09999e-05	1.24604e-05	1.90077e-05	3.85076e-05	3.40122e-05	2.10477e-05	1.65752e-05	3.09642e-05	4.30732e-05	5.20887e-05
	0.535	2.42018e-05	2.53331e-05	3.97294e-05	2.20363e-05	3.60597e-05	1.2372e-05	1.69783e-05	2.97837e-05	3.88896e-05	1.56609e-05	2.33571e-05	1.80023e-05	3.96726e-05	3.09661e-05	2.93439e-05	2.0632e-05	3.82809e-05	1.9691e-05	2.22941e-05	2.10325e-05	2.74116e-05	1.52213e-05	3.38994e-05	1.71644e-05	4.5884e-05	1.98061e-05	2.10409e-05	3.98257e-05	1.43925e-05	3.27702e-05	1.91227e-05	3.00299e-05	2.32548e-05	1.17079e-05	2.19702e-05	3.85073e-05	2.07905e-05	1.43571e-05	2.96663e-05	1.26221e-05	1.91927e-05	4.47554e-05	3.25118e-05	2.12447e-05	1.68463e-05	2.86775e-05	4.12392e-05	5.3237e-05
	0.54	1.13595e-05	2.58184e-05	4.08427e-05	2.23415e-05	3.60022e-05	1.25887e-05	1.74187e-05	3.0147e-05	3.93567e-05	1.54969e-05	2.37381e-05	1.84563e-05	4.05437e-05	3.12146e-05	2.90622e-05	2.10278e-05	3.95637e-05	1.99403e-05	2.20705e-05	3.22767e-05	2.79854e-05	1.54788e-05	3.35264e-05	1.75344e-05	5.26624e-05	2.05349e-05	3.1994e-05	4.1687e-05	1.4802e-05	3.28454e-05	2.21412e-05	3.54077e-05	2.68095e-05	1.1844e-05	1.84091e-05	3.99254e-05	2.11954e-05	1.46454e-05	2.95093e-05	1.2629e-05	1.94084e-05	4.24144e-05	3.11301e-05	2.14227e-05	1.71083e-05	2.7905e-05	4.47379e-05	5.12918e-05
	0.545	1.15209e-05	2.56461e-05	4.15258e-05	2.1289e-05	3.57142e-05	1.2531e-05	1.77188e-05	3.05647e-05	3.97325e-05	1.76446e-05	2.37735e-05	1.85787e-05	4.18897e-05	3.15508e-05	3.1733e-05	2.14186e-05	3.9769e-05	2.04856e-05	2.16861e-05	3.50259e-05	2.79499e-05	1.56458e-05	3.40643e-05	1.78406e-05	5.46077e-05	2.08461e-05	3.50913e-05	4.35375e-05	1.51414e-05	3.34383e-05	2.27362e-05	4.40163e-05	3.02608e-05	1.18827e-05	2.43482e-05	4.06704e-05	2.1027e-05	2.0201e-05	2.9899e-05	1.23739e-05	1.94442e-05	3.87545e-05	3.37027e-05	2.00441e-05	1.78713e-05	2.90224e-05	4.72878e-05	5.14136e-05
	0.55	1.18893e-05	2.60468e-05	4.26781e-05	2.1778e-05	3.60488e-05	1.32668e-05	1.79728e-05	3.08123e-05	4.05589e-05	1.75559e-05	2.39265e-05	1.82146e-05	4.23974e-05	3.13685e-05	3.37327e-05	2.18146e-05	4.20651e-05	2.07182e-05	2.704e-05	3.24262e-05	2.67394e-05	1.58542e-05	2.80467e-05	1.8484e-05	6.26991e-05	2.08356e-05	3.42643e-05	4.3561e-05	1.53791e-05	3.37318e-05	2.34408e-05	4.23933e-05	3.20877e-05	1.16689e-05	3.42368e-05	4.12237e-05	2.09729e-05	2.47238e-05	3.02025e-05	2.13791e-05	1.92655e-05	3.67677e-05	3.30205e-05	1.9889e-05	1.87476e-05	2.62199e-05	4.74754e-05	5.13801e-05
	0.555	1.19776e-05	2.56847e-05	4.25386e-05	2.30814e-05	3.63329e-05	1.34798e-05	1.8136e-05	3.12678e-05	4.09323e-05	1.69408e-05	2.41905e-05	1.87494e-05	4.30696e-05	3.14216e-05	3.37159e-05	2.22313e-05	4.50134e-05	2.09514e-05	2.51463e-05	3.729e-05	2.68988e-05	1.60241e-05	3.44164e-05	1.9001e-05	6.59753e-05	2.05756e-05	3.4989e-05	4.50536e-05	1.56198e-05	3.38716e-05	2.32813e-05	4.70864e-05	3.24205e-05	1.08615e-05	3.66972e-05	4.20576e-05	2.12181e-05	2.90349e-05	2.96299e-05	2.51442e-05	1.95381e-05	3.29801e-05	3.65672e-05	1.95749e-05	1.86565e-05	2.48637e-05	4.77535e-05	5.28536e-05
	0.56	1.22191e-05	2.48152e-05	4.25101e-05	2.50623e-05	3.6663e-05	1.36908e-05	1.69773e-05	2.95516e-05	4.05716e-05	2.12673e-05	2.44153e-05	2.94697e-05	3.94218e-05	3.27216e-05	3.44785e-05	2.2406e-05	4.05539e-05	2.1194e-05	2.3112e-05	3.48318e-05	2.62725e-05	1.64202e-05	3.36728e-05	1.81589e-05	6.88543e-05	2.24514e-05	3.59167e-05	4.53887e-05	1.58585e-05	3.47861e-05	2.15546e-05	5.30849e-05	3.27926e-05	9.9898e-06	3.34894e-05	5.63363e-05	2.14003e-05	2.93775e-05	3.04766e-05	2.35747e-05	2.00068e-05	3.39803e-05	3.66071e-05	1.99303e-05	2.18245e-05	2.48897e-05	4.81625e-05	5.27379e-05
	0.565	1.22857e-05	2.50366e-05	4.22735e-05	2.50213e-05	3.71055e-05	1.39127e-05	1.95006e-05	2.78206e-05	3.96212e-05	1.80326e-05	2.46156e-05	2.54376e-05	3.99113e-05	3.39897e-05	3.42727e-05	2.2622e-05	3.97559e-05	2.1448e-05	2.36043e-05	3.48002e-05	2.64453e-05	1.67583e-05	3.46444e-05	1.67564e-05	6.98245e-05	2.23849e-05	3.66665e-05	4.60488e-05	1.60721e-05	4.18804e-05	2.5507e-05	5.46626e-05	3.30682e-05	1.55033e-05	3.39603e-05	6.46408e-05	2.14675e-05	3.14934e-05	3.78829e-05	2.38277e-05	2.0173e-05	3.77491e-05	3.3523e-05	2.02156e-05	2.26835e-05	2.63376e-05	4.85514e-05	5.44481e-05
	0.57	1.46278e-05	2.54311e-05	3.53989e-05	2.58303e-05	3.76948e-05	1.41413e-05	2.56918e-05	2.85159e-05	4.24144e-05	1.75125e-05	2.49973e-05	2.11886e-05	4.06309e-05	3.36022e-05	3.47591e-05	2.29287e-05	3.87065e-05	2.20261e-05	3.31262e-05	3.35083e-05	2.71452e-05	2.10806e-05	3.7266e-05	1.6813e-05	7.12966e-05	2.29905e-05	3.68669e-05	4.3344e-05	1.63333e-05	5.55682e-05	2.58415e-05	5.56825e-05	3.33951e-05	1.94213e-05	3.50858e-05	6.55367e-05	2.13973e-05	3.16412e-05	3.74175e-05	2.1655e-05	2.04749e-05	4.01803e-05	3.36152e-05	2.06466e-05	3.58436e-05	2.52105e-05	5.062e-05	5.24057e-05
	0.575	1.45927e-05	2.57702e-05	3.57856e-05	2.83341e-05	3.83747e-05	1.43542e-05	4.45864e-05	3.44808e-05	4.94579e-05	1.9106e-05	2.54452e-05	2.14431e-05	3.2094e-05	2.8789e-05	3.6805e-05	2.34591e-05	3.49794e-05	2.23349e-05	3.28818e-05	3.40087e-05	2.76085e-05	3.82753e-05	3.92807e-05	1.6825e-05	7.18185e-05	2.95136e-05	3.7569e-05	4.60272e-05	1.77814e-05	5.59464e-05	2.6279e-05	5.7838e-05	3.38144e-05	2.29289e-05	4.35673e-05	6.76762e-05	2.23679e-05	3.22941e-05	3.89806e-05	2.18585e-05	2.35892e-05	4.02621e-05	4.10837e-05	2.09304e-05	4.28785e-05	2.30809e-05	4.85472e-05	5.387e-05
	0.58	2.00206e-05	2.57768e-05	3.80112e-05	2.82959e-05	4.07095e-05	1.446e-05	4.44607e-05	3.60094e-05	4.8369e-05	2.31242e-05	2.58729e-05	2.57275e-05	3.45327e-05	2.89972e-05	3.65028e-05	2.37366e-05	3.51669e-05	2.25952e-05	3.14439e-05	3.44379e-05	2.77288e-05	3.93913e-05	3.90851e-05	1.64682e-05	7.36454e-05	3.46661e-05	3.41566e-05	4.87405e-05	1.91484e-05	5.7333e-05	2.96746e-05	6.76416e-05	3.4163e-05	2.75578e-05	4.92098e-05	6.99444e-05	1.72024e-05	3.23899e-05	3.89497e-05	2.34112e-05	2.72983e-05	3.97329e-05	5.34331e-05	2.12015e-05	4.59106e-05	2.23629e-05	5.15483e-05	5.41938e-05
	0.585	2.23315e-05	2.04262e-05	4.13786e-05	2.87078e-05	4.15973e-05	1.67388e-05	4.51818e-05	3.80547e-05	5.38316e-05	3.91664e-05	2.60476e-05	2.4601e-05	3.52618e-05	2.90533e-05	3.74593e-05	2.4132e-05	3.58977e-05	2.2872e-05	3.23265e-05	3.50472e-05	2.82606e-05	3.67444e-05	4.05382e-05	1.81449e-05	7.41731e-05	4.13322e-05	4.40604e-05	5.10549e-05	1.94436e-05	6.22099e-05	4.95377e-05	6.82754e-05	3.46236e-05	4.23856e-05	4.88528e-05	6.81857e-05	2.96176e-05	3.45339e-05	3.87813e-05	2.37869e-05	3.2841e-05	4.05628e-05	6.07796e-05	2.13969e-05	4.8321e-05	2.30797e-05	5.23821e-05	5.33884e-05
	0.59	2.37692e-05	2.14533e-05	4.18883e-05	2.89673e-05	4.21531e-05	2.11926e-05	4.66535e-05	3.87688e-05	5.41739e-05	4.21752e-05	2.64368e-05	2.44982e-05	3.29452e-05	2.96281e-05	3.78789e-05	2.55418e-05	3.58068e-05	2.31175e-05	3.53234e-05	3.59142e-05	2.87183e-05	3.78698e-05	4.11029e-05	1.94179e-05	7.52446e-05	4.87527e-05	4.70035e-05	6.29093e-05	1.98269e-05	7.14087e-05	4.984e-05	7.05226e-05	3.50267e-05	5.06735e-05	4.94033e-05	7.05749e-05	4.70707e-05	3.14961e-05	4.29224e-05	2.40548e-05	3.16233e-05	4.47345e-05	6.45392e-05	2.35682e-05	4.83995e-05	2.36777e-05	5.79835e-05	5.20513e-05
	0.595	3.04088e-05	2.16478e-05	4.48912e-05	2.71908e-05	4.79423e-05	3.55188e-05	5.07649e-05	3.97333e-05	5.28903e-05	4.29637e-05	2.71114e-05	2.46852e-05	3.46365e-05	3.87225e-05	3.91718e-05	5.47775e-05	4.23671e-05	2.33642e-05	3.46997e-05	3.68257e-05	2.91001e-05	4.42505e-05	3.76421e-05	1.90626e-05	7.63565e-05	5.10673e-05	4.70227e-05	6.53272e-05	3.35619e-05	7.35384e-05	5.5329e-05	7.16644e-05	3.53539e-05	5.20882e-05	5.14892e-05	7.22283e-05	4.24357e-05	3.18107e-05	4.37912e-05	2.44441e-05	3.20386e-05	5.48876e-05	6.26645e-05	2.74648e-05	4.93781e-05	2.43392e-05	5.438e-05	5.04656e-05
	0.6	3.22304e-05	2.21689e-05	4.02204e-05	2.44308e-05	4.89913e-05	5.32287e-05	5.0151e-05	4.04233e-05	4.95769e-05	4.47062e-05	2.75818e-05	2.49748e-05	3.66088e-05	3.80633e-05	3.97697e-05	6.08247e-05	4.32027e-05	2.36524e-05	3.42309e-05	3.52904e-05	2.94269e-05	4.66783e-05	3.59692e-05	1.82529e-05	7.64765e-05	5.67937e-05	5.17777e-05	6.41136e-05	4.79585e-05	7.49002e-05	5.98788e-05	7.19304e-05	3.576e-05	5.4225e-05	5.41811e-05	7.32754e-05	5.63175e-05	3.65757e-05	3.93913e-05	2.4625e-05	3.50407e-05	5.97996e-05	6.52666e-05	2.91203e-05	4.95806e-05	2.52462e-05	5.71261e-05	5.02716e-05
	0.605	3.75425e-05	2.72324e-05	3.83115e-05	2.81011e-05	6.05698e-05	5.39923e-05	4.87536e-05	4.19997e-05	4.96021e-05	3.75376e-05	2.82912e-05	2.55986e-05	3.64096e-05	4.13701e-05	5.2472e-05	6.48316e-05	5.82359e-05	2.40521e-05	3.57524e-05	3.65856e-05	3.13871e-05	5.01642e-05	3.63333e-05	1.79303e-05	7.68126e-05	6.87624e-05	5.1972e-05	6.87797e-05	4.56578e-05	7.74825e-05	6.23035e-05	7.40425e-05	3.61268e-05	6.46047e-05	5.69128e-05	7.42594e-05	6.53504e-05	3.66537e-05	4.12676e-05	2.50232e-05	3.72818e-05	6.87855e-05	6.80769e-05	2.71532e-05	4.93548e-05	2.674e-05	5.97032e-05	5.19214e-05
	0.61	4.17159e-05	2.76452e-05	4.20056e-05	3.39583e-05	6.19362e-05	6.01558e-05	4.97122e-05	4.32793e-05	5.66075e-05	3.66181e-05	2.87295e-05	2.72132e-05	3.92252e-05	4.44055e-05	5.69242e-05	6.4998e-05	5.96124e-05	2.40936e-05	3.52508e-05	3.65889e-05	3.03415e-05	4.8385e-05	3.53441e-05	1.75625e-05	7.70596e-05	7.44411e-05	5.43307e-05	7.32776e-05	4.60316e-05	7.59295e-05	6.5249e-05	7.45076e-05	3.83093e-05	7.17571e-05	6.05507e-05	7.40054e-05	6.72729e-05	3.65721e-05	3.93794e-05	2.52036e-05	3.7881e-05	7.22646e-05	7.29045e-05	2.83991e-05	5.07228e-05	2.68433e-05	6.02774e-05	5.22014e-05
	0.615	4.30731e-05	2.78054e-05	4.24536e-05	4.84992e-05	6.46816e-05	6.09523e-05	5.19466e-05	5.17335e-05	5.86369e-05	3.71045e-05	2.78916e-05	3.90472e-05	4.94711e-05	4.51958e-05	5.73845e-05	6.65748e-05	6.13653e-05	2.4341e-05	4.07061e-05	3.80488e-05	3.04294e-05	4.92304e-05	3.32576e-05	1.73334e-05	7.89708e-05	7.52785e-05	5.57174e-05	7.42251e-05	5.46811e-05	7.74102e-05	6.66107e-05	7.33673e-05	3.46049e-05	7.35688e-05	6.09575e-05	7.72169e-05	6.97918e-05	3.74921e-05	4.13201e-05	2.54696e-05	3.9663e-05	7.45469e-05	7.74723e-05	3.13332e-05	5.09411e-05	3.19528e-05	6.81035e-05	5.29514e-05
	0.62	4.70228e-05	2.75901e-05	4.09313e-05	5.52055e-05	6.74337e-05	6.65482e-05	5.41532e-05	5.69399e-05	5.65071e-05	3.79035e-05	3.24819e-05	4.01176e-05	5.11498e-05	4.48486e-05	5.8105e-05	6.86456e-05	6.48545e-05	2.46864e-05	4.6146e-05	4.51897e-05	2.88424e-05	5.11541e-05	3.22763e-05	2.12966e-05	8.05934e-05	7.67821e-05	5.91148e-05	7.51452e-05	6.15107e-05	7.7006e-05	7.03082e-05	7.60614e-05	3.50446e-05	7.57045e-05	6.11131e-05	7.87987e-05	7.02193e-05	3.48718e-05	4.62405e-05	2.56842e-05	4.57824e-05	7.54594e-05	7.82831e-05	3.25431e-05	5.16289e-05	5.40884e-05	6.91425e-05	5.92127e-05
	0.625	6.45132e-05	2.84771e-05	4.82585e-05	5.39971e-05	6.40091e-05	7.13062e-05	5.64861e-05	5.87946e-05	5.93426e-05	3.87624e-05	4.79654e-05	3.94376e-05	6.80583e-05	4.5448e-05	5.86042e-05	6.87938e-05	6.78333e-05	5.44279e-05	5.29032e-05	5.47848e-05	3.50944e-05	5.35108e-05	3.2708e-05	2.09967e-05	8.08512e-05	7.78237e-05	5.92203e-05	7.5712e-05	6.00071e-05	7.71239e-05	7.08988e-05	8.03928e-05	3.50976e-05	7.58917e-05	6.1054e-05	7.98394e-05	7.35825e-05	4.24628e-05	4.80449e-05	2.58305e-05	4.97124e-05	7.61301e-05	7.9744e-05	2.92571e-05	5.23651e-05	5.95834e-05	7.11149e-05	5.95433e-05
	0.63	7.19089e-05	6.38355e-05	4.82511e-05	5.32209e-05	6.715e-05	7.4227e-05	5.43861e-05	6.59972e-05	5.84153e-05	3.9045e-05	4.78698e-05	5.97231e-05	7.33482e-05	4.6389e-05	5.89352e-05	6.93444e-05	6.87521e-05	6.41581e-05	6.0392e-05	5.6821e-05	3.56795e-05	5.59215e-05	3.30435e-05	2.1686e-05	8.12138e-05	7.9292e-05	5.76396e-05	7.71611e-05	5.9414e-05	8.30501e-05	7.30103e-05	8.23307e-05	3.55101e-05	7.75425e-05	6.43201e-05	8.05808e-05	7.42848e-05	4.25742e-05	5.01729e-05	2.62896e-05	5.056e-05	7.5406e-05	8.08518e-05	3.1711e-05	5.29987e-05	6.48803e-05	7.25777e-05	6.28088e-05
	0.635	7.4428e-05	8.16817e-05	4.86866e-05	5.51682e-05	6.64638e-05	7.50738e-05	5.19013e-05	6.96677e-05	6.16734e-05	4.17238e-05	4.89983e-05	6.73807e-05	7.37924e-05	5.04766e-05	5.97613e-05	7.30626e-05	7.27841e-05	6.37797e-05	6.67736e-05	6.23769e-05	3.61212e-05	5.44686e-05	3.33796e-05	2.18109e-05	8.25766e-05	8.03302e-05	5.74006e-05	7.89895e-05	6.33309e-05	8.47309e-05	7.33838e-05	8.30294e-05	3.59301e-05	7.7995e-05	6.56652e-05	8.28651e-05	7.57163e-05	4.33419e-05	5.03089e-05	3.20604e-05	5.7238e-05	7.42442e-05	8.19536e-05	5.00792e-05	5.5298e-05	6.55419e-05	7.53146e-05	6.0683e-05
	0.64	7.76507e-05	8.50876e-05	4.91664e-05	5.16425e-05	6.70501e-05	7.58907e-05	5.06538e-05	7.01834e-05	6.59752e-05	4.39627e-05	5.24297e-05	6.5478e-05	7.6142e-05	5.08415e-05	5.80226e-05	7.59906e-05	7.37398e-05	6.32058e-05	6.54716e-05	6.35857e-05	3.70717e-05	5.47195e-05	3.38508e-05	2.21959e-05	8.39417e-05	8.1378e-05	5.73201e-05	8.23479e-05	6.53651e-05	8.5013e-05	7.36772e-05	8.47499e-05	3.63174e-05	7.9555e-05	6.61667e-05	8.40762e-05	7.63608e-05	4.30424e-05	6.0492e-05	3.45741e-05	7.00008e-05	7.39533e-05	8.28987e-05	6.38517e-05	6.58052e-05	6.8911e-05	7.74128e-05	6.42454e-05
	0.645	7.91938e-05	9.05178e-05	5.08055e-05	6.25264e-05	6.60514e-05	7.76479e-05	5.20684e-05	7.18854e-05	6.70016e-05	4.56125e-05	5.45499e-05	6.84896e-05	7.99452e-05	5.20466e-05	5.91504e-05	7.84936e-05	7.48042e-05	6.40062e-05	6.43855e-05	6.37808e-05	3.67896e-05	5.31127e-05	3.28074e-05	2.26376e-05	8.46174e-05	8.22489e-05	6.65922e-05	8.3777e-05	7.0558e-05	8.70433e-05	7.45038e-05	8.58715e-05	3.85609e-05	8.05819e-05	6.83449e-05	8.53924e-05	7.96532e-05	4.49201e-05	7.38996e-05	3.93173e-05	7.41284e-05	7.58981e-05	8.09696e-05	6.8886e-05	7.52794e-05	7.29985e-05	7.93515e-05	6.58537e-05
	0.65	8.20166e-05	9.2441e-05	4.80057e-05	6.24538e-05	6.98243e-05	7.99101e-05	5.27607e-05	7.77769e-05	7.05965e-05	4.38733e-05	6.40795e-05	7.37319e-05	8.2113e-05	6.04682e-05	5.5846e-05	7.96574e-05	7.28905e-05	6.12497e-05	6.85046e-05	6.72621e-05	3.87798e-05	5.07047e-05	3.04922e-05	2.27487e-05	8.46254e-05	8.25803e-05	7.19048e-05	8.69971e-05	7.39806e-05	8.87505e-05	7.44308e-05	8.77287e-05	3.92732e-05	8.11664e-05	7.00143e-05	8.68242e-05	8.04087e-05	4.46589e-05	7.86697e-05	6.19517e-05	8.03239e-05	7.73282e-05	8.26718e-05	6.92036e-05	7.53649e-05	7.31358e-05	7.88515e-05	7.29524e-05
	0.655	8.44162e-05	9.233e-05	4.76898e-05	6.52712e-05	7.62831e-05	8.35949e-05	6.26862e-05	8.29039e-05	7.19328e-05	4.47212e-05	7.29637e-05	7.98231e-05	8.9286e-05	7.39771e-05	5.68239e-05	8.1809e-05	7.61333e-05	7.02039e-05	6.8313e-05	6.63952e-05	3.87841e-05	5.68562e-05	3.05683e-05	2.31758e-05	8.40494e-05	8.33338e-05	7.49582e-05	8.89081e-05	7.45142e-05	8.98521e-05	7.54831e-05	8.79909e-05	6.51921e-05	8.19662e-05	7.08039e-05	8.68082e-05	8.21722e-05	4.62672e-05	8.29388e-05	6.88906e-05	8.34904e-05	7.90528e-05	8.32459e-05	7.29083e-05	7.58003e-05	7.58056e-05	8.04057e-05	7.6619e-05
	0.66	8.5186e-05	9.30777e-05	5.02106e-05	7.43766e-05	7.62225e-05	8.42028e-05	7.53089e-05	8.71338e-05	7.21858e-05	4.55224e-05	7.07363e-05	8.08646e-05	9.28142e-05	7.71389e-05	5.84668e-05	8.46776e-05	7.47151e-05	7.53487e-05	6.823e-05	6.61338e-05	4.07348e-05	5.70801e-05	4.36459e-05	2.34614e-05	8.7021e-05	8.36675e-05	7.5365e-05	9.12847e-05	7.82869e-05	8.98652e-05	7.77615e-05	8.74206e-05	7.64897e-05	8.37622e-05	7.33234e-05	8.83606e-05	8.31922e-05	4.7419e-05	8.41471e-05	7.4845e-05	8.44356e-05	7.92163e-05	8.64593e-05	7.59062e-05	7.83831e-05	7.63493e-05	8.29982e-05	7.79575e-05
	0.665	8.53753e-05	9.59511e-05	4.96729e-05	9.29537e-05	8.00235e-05	8.55128e-05	8.178e-05	8.79889e-05	7.20994e-05	4.64823e-05	7.21227e-05	8.29563e-05	9.31554e-05	8.24472e-05	6.15659e-05	8.47717e-05	7.73158e-05	7.51693e-05	6.9055e-05	6.25055e-05	4.13895e-05	5.74144e-05	6.02932e-05	3.45894e-05	8.77996e-05	8.48813e-05	7.69829e-05	9.05653e-05	8.08143e-05	9.21231e-05	7.86578e-05	8.76708e-05	7.63264e-05	8.51238e-05	7.85304e-05	9.01224e-05	8.44318e-05	4.7841e-05	8.44258e-05	7.64286e-05	8.71803e-05	8.12155e-05	8.90372e-05	7.56059e-05	8.14695e-05	7.92206e-05	8.5785e-05	7.90648e-05
	0.67	8.62999e-05	9.72303e-05	5.03103e-05	9.4421e-05	7.89702e-05	8.72631e-05	8.32036e-05	9.00881e-05	7.40115e-05	6.22312e-05	7.40847e-05	8.76653e-05	9.42733e-05	8.70362e-05	6.44349e-05	8.53138e-05	7.88895e-05	7.60189e-05	7.43423e-05	6.53069e-05	3.99041e-05	5.45444e-05	6.91403e-05	6.7102e-05	8.87124e-05	8.53305e-05	8.04344e-05	9.09853e-05	8.44902e-05	9.48133e-05	7.84543e-05	8.83619e-05	7.74458e-05	8.68973e-05	8.37008e-05	9.20146e-05	8.50913e-05	4.93451e-05	8.54392e-05	7.78565e-05	8.77915e-05	8.43321e-05	9.13393e-05	7.89561e-05	8.52643e-05	8.16711e-05	8.64325e-05	8.07801e-05
	0.675	8.7177e-05	9.77759e-05	5.41828e-05	9.71662e-05	8.12138e-05	8.89797e-05	8.65285e-05	9.11661e-05	7.43136e-05	6.88643e-05	7.43856e-05	9.23378e-05	9.61846e-05	8.89953e-05	6.21821e-05	8.61384e-05	8.23858e-05	7.65623e-05	8.51518e-05	6.39057e-05	4.8929e-05	5.93249e-05	7.38803e-05	7.89053e-05	9.03335e-05	8.7475e-05	8.73008e-05	9.16457e-05	8.88381e-05	9.51089e-05	8.08938e-05	9.00678e-05	7.95183e-05	8.73378e-05	8.60535e-05	9.50953e-05	8.48201e-05	6.2606e-05	8.74553e-05	8.21381e-05	8.98826e-05	8.71101e-05	9.42181e-05	7.92032e-05	8.81909e-05	8.97722e-05	8.77896e-05	8.65507e-05
	0.68	8.93151e-05	9.96794e-05	5.38522e-05	9.99477e-05	8.15099e-05	9.03842e-05	8.89869e-05	9.23033e-05	7.80647e-05	7.01587e-05	7.75264e-05	9.61427e-05	9.83125e-05	9.2372e-05	6.62347e-05	8.56757e-05	8.46288e-05	8.03386e-05	8.5916e-05	6.7484e-05	5.61202e-05	6.33589e-05	7.73254e-05	8.37139e-05	9.45334e-05	8.82686e-05	8.87579e-05	9.29845e-05	9.04226e-05	9.74239e-05	8.51673e-05	9.28624e-05	8.09488e-05	8.63676e-05	8.69127e-05	9.67677e-05	8.3447e-05	6.73561e-05	8.79894e-05	8.56315e-05	9.27948e-05	8.85945e-05	9.49868e-05	8.03971e-05	9.06394e-05	9.04463e-05	8.76794e-05	8.93309e-05
	0.685	8.99898e-05	9.91599e-05	5.68318e-05	0.000103069	8.85132e-05	9.31939e-05	9.28402e-05	9.74514e-05	7.97213e-05	7.56997e-05	7.89116e-05	9.85076e-05	9.89162e-05	9.46368e-05	6.92253e-05	8.74212e-05	8.87867e-05	8.67785e-05	8.71866e-05	7.24439e-05	6.57036e-05	7.00513e-05	8.30988e-05	8.9214e-05	9.38213e-05	8.77104e-05	9.12258e-05	9.4e-05	8.89301e-05	9.842e-05	8.86264e-05	9.30492e-05	8.19956e-05	9.24063e-05	8.89007e-05	9.78634e-05	8.78107e-05	6.59993e-05	9.06481e-05	8.76087e-05	9.42516e-05	9.10705e-05	9.5818e-05	8.13295e-05	9.22861e-05	9.29906e-05	8.98484e-05	9.14487e-05
	0.69	9.1392e-05	0.000102047	7.37613e-05	0.0001048	9.07724e-05	9.49062e-05	9.56801e-05	9.92899e-05	8.6556e-05	7.12364e-05	8.45698e-05	9.88846e-05	0.000100599	9.60006e-05	6.90935e-05	9.09753e-05	8.84089e-05	8.96723e-05	8.87366e-05	7.67442e-05	7.9105e-05	8.06596e-05	8.78326e-05	8.921e-05	9.59015e-05	8.99564e-05	9.32098e-05	9.51753e-05	8.89317e-05	0.000101484	9.25133e-05	9.38209e-05	8.27474e-05	9.46516e-05	8.96494e-05	9.84397e-05	9.05696e-05	6.95344e-05	9.08042e-05	8.85139e-05	9.59476e-05	9.36105e-05	9.75632e-05	8.24382e-05	9.42023e-05	9.51583e-05	9.17022e-05	9.2935e-05
	0.695	9.21637e-05	0.00010341	8.90749e-05	0.000104498	9.34082e-05	9.7167e-05	9.75502e-05	9.98844e-05	9.45095e-05	8.13278e-05	8.86243e-05	0.000100695	0.000101307	9.68811e-05	7.29319e-05	9.44289e-05	9.27966e-05	8.85816e-05	8.95835e-05	7.6994e-05	8.00758e-05	8.43494e-05	8.94543e-05	9.20535e-05	9.67487e-05	9.19363e-05	9.35943e-05	9.64894e-05	9.06744e-05	0.000104231	9.35354e-05	9.51182e-05	8.36898e-05	9.48543e-05	9.09157e-05	9.89988e-05	9.23825e-05	7.00872e-05	9.17236e-05	9.14536e-05	9.66864e-05	9.48129e-05	9.81331e-05	8.34683e-05	9.59866e-05	9.5607e-05	9.1882e-05	9.3734e-05
	0.7	9.48936e-05	0.000105277	9.86667e-05	0.000105033	9.70004e-05	0.000100016	0.000100134	0.000103286	9.68383e-05	8.87656e-05	9.27289e-05	0.00010273	0.000105524	9.76728e-05	8.40862e-05	9.08712e-05	9.37681e-05	9.25909e-05	9.22518e-05	7.91715e-05	7.95557e-05	8.7245e-05	9.01516e-05	9.65913e-05	9.87415e-05	9.39637e-05	9.53842e-05	9.75236e-05	9.32927e-05	0.000105875	9.46853e-05	9.57485e-05	8.44857e-05	9.56283e-05	9.28052e-05	0.000102643	9.34264e-05	7.08437e-05	9.351e-05	9.53935e-05	9.77338e-05	9.526e-05	9.91099e-05	8.38896e-05	9.60792e-05	9.90765e-05	9.29549e-05	9.49892e-05
	0.705	9.46762e-05	0.000106785	0.000104847	0.000107178	9.92741e-05	0.000103632	0.000101393	0.000104708	0.000100446	9.45615e-05	9.48487e-05	0.000103576	0.000107637	9.90159e-05	8.52864e-05	9.49395e-05	9.45641e-05	9.3202e-05	9.39708e-05	8.20991e-05	8.02462e-05	8.80511e-05	9.23776e-05	9.77446e-05	0.000103005	9.62386e-05	9.72654e-05	9.88085e-05	9.5681e-05	0.000106542	9.62393e-05	9.68576e-05	8.57385e-05	9.65739e-05	9.336e-05	0.000103804	9.64681e-05	7.46683e-05	9.38996e-05	9.58596e-05	9.85741e-05	9.69097e-05	0.000101436	8.51029e-05	9.85049e-05	0.000100135	9.62488e-05	9.58823e-05
	0.71	9.64085e-05	0.000109075	0.000107358	0.000108962	0.000100673	0.000108798	0.000102204	0.000105202	0.00010181	9.4453e-05	0.000102151	0.000106049	0.00010975	9.86467e-05	8.92889e-05	0.000101087	9.53308e-05	9.80995e-05	9.508e-05	8.2916e-05	8.50214e-05	9.02126e-05	9.60196e-05	0.000100057	0.000104929	9.79816e-05	9.92344e-05	9.9863e-05	9.67382e-05	0.000108102	9.59216e-05	9.76105e-05	8.94194e-05	9.88411e-05	9.40144e-05	0.000104574	9.77525e-05	8.3585e-05	9.5755e-05	9.65908e-05	0.000100354	9.93183e-05	0.000103043	8.53064e-05	0.000100591	0.000100955	9.72385e-05	9.6581e-05
	0.715	9.91181e-05	0.000110653	0.000110065	0.000109634	0.0001017	0.000110649	0.000104983	0.000106273	0.000106714	0.000100176	0.000105387	0.000106111	0.000110984	9.95609e-05	9.43432e-05	0.000103185	9.7303e-05	0.000103351	9.74938e-05	8.39554e-05	8.8775e-05	9.37373e-05	9.92408e-05	0.000101061	0.000105694	9.98132e-05	0.000101096	0.000102242	9.90196e-05	0.000108682	9.69052e-05	9.78943e-05	9.14559e-05	0.000100405	9.62662e-05	0.000104313	9.82597e-05	8.65524e-05	9.64862e-05	9.85117e-05	0.000101376	0.000100755	0.000103862	9.15798e-05	0.000102118	0.000102103	9.86005e-05	9.78047e-05
	0.72	9.7775e-05	0.000111696	0.000110189	0.000111737	0.000102776	0.000111969	0.000106638	0.000107629	0.000110288	0.000101271	0.00010645	0.000107515	0.000112528	0.000101333	9.63165e-05	0.000104148	9.85262e-05	0.000106596	9.84367e-05	8.48423e-05	9.07697e-05	9.47684e-05	9.99451e-05	0.000100023	0.000106463	9.99512e-05	0.000102839	0.00010342	0.000101034	0.000110141	9.84496e-05	0.000100244	9.33405e-05	0.000102563	9.8145e-05	0.000105871	9.9408e-05	8.95508e-05	9.7781e-05	9.98385e-05	0.000102757	0.000100936	0.000105268	9.42959e-05	0.000104802	0.000103144	0.000101178	9.95078e-05
	0.725	9.90373e-05	0.000112602	0.00011305	0.000112203	0.00010439	0.000113489	0.000109584	0.000109184	0.000112067	0.000103217	0.000108375	0.000109741	0.000113667	0.000105855	9.76127e-05	0.000106393	0.000100021	0.000107564	0.000100226	8.76393e-05	9.16451e-05	9.6485e-05	0.000102344	0.000101644	0.000108504	0.000100411	0.000104443	0.000104408	0.000103633	0.00011121	9.95376e-05	0.000101201	9.45143e-05	0.000103948	9.92838e-05	0.000106872	0.000101357	9.41629e-05	9.99766e-05	0.000100601	0.000103917	0.000102051	0.000105702	9.43062e-05	0.000106371	0.00010329	0.000102393	0.000101167
	0.73	0.000100403	0.000114031	0.000114743	0.000112307	0.000108046	0.000114753	0.000111669	0.000110033	0.000113187	0.000104262	0.000110456	0.000111161	0.000114206	0.00010777	9.90807e-05	0.000109408	0.000102498	0.000109513	0.000102619	9.01765e-05	9.41174e-05	9.72658e-05	0.000101854	0.000104369	0.000110064	0.000101335	0.000106621	0.000105485	0.000104397	0.00011211	0.000100618	0.000101524	9.51482e-05	0.000105623	9.97069e-05	0.000106927	0.00010296	9.59142e-05	0.000101864	0.000101193	0.000105224	0.0001041	0.000106186	9.63465e-05	0.000107142	0.000104551	0.000103507	0.000104049
	0.735	0.000102155	0.000115996	0.00011528	0.000115891	0.000111016	0.000116482	0.000113527	0.000111258	0.000114215	0.000107321	0.000111182	0.000113134	0.000115568	0.000108313	9.99291e-05	0.000111046	0.000105516	0.000110576	0.000103187	9.30824e-05	9.67654e-05	9.89263e-05	0.000102981	0.000106728	0.000109532	0.000102536	0.000107262	0.000107781	0.000106959	0.000112871	0.000102195	0.000102672	9.87554e-05	0.000106243	0.000101004	0.00010738	0.000103281	9.7569e-05	0.000101098	0.000102176	0.000106922	0.000106876	0.000107888	9.83456e-05	0.000108112	0.000106784	0.000103924	0.000106019
	0.74	0.000103327	0.000116669	0.000115946	0.000116086	0.000112864	0.000117012	0.000114894	0.000112747	0.000114635	0.000109052	0.000111162	0.000113513	0.000115406	0.000110316	0.000103606	0.000112075	0.000106706	0.000112821	0.000103645	9.50429e-05	9.80508e-05	9.93583e-05	0.000103818	0.000107625	0.000110089	0.000104869	0.000108498	0.000108585	0.000107937	0.000113291	0.000104884	0.000103212	0.000104578	0.000108076	0.000103357	0.000107854	0.000105661	9.91034e-05	0.000104508	0.000103952	0.0001075	0.000107579	0.000109406	0.000102205	0.00010871	0.000107394	0.000104066	0.000106999
	0.745	0.000105232	0.000117424	0.0001164	0.000116419	0.000113711	0.000118616	0.000115898	0.000114072	0.00011573	0.000110922	0.000112477	0.000116434	0.000116737	0.000111779	0.000105342	0.000113436	0.000108652	0.000115001	0.000107791	9.70158e-05	9.7885e-05	0.000101154	0.000105382	0.000108035	0.000109606	0.000105591	0.000109898	0.000110512	0.000108705	0.000114174	0.000107482	0.000105019	0.000106619	0.000109329	0.000106357	0.000108805	0.000107573	0.000100917	0.000105532	0.000106522	0.000108714	0.000108478	0.000110386	0.000103559	0.000109752	0.000108855	0.000105374	0.000107384
	0.75	0.000107064	0.000122027	0.000117042	0.00011699	0.000114194	0.000118673	0.000116528	0.000115431	0.000116403	0.000112741	0.000113567	0.000117617	0.000117003	0.000112265	0.000106952	0.000113703	0.000109185	0.000115573	0.000109324	0.000100032	9.75096e-05	0.000102924	0.000107335	0.000109053	0.000110792	0.000107961	0.000112245	0.000112385	0.00011004	0.000114888	0.000108444	0.000106667	0.00010798	0.000110369	0.000109167	0.000110808	0.000109862	0.000105429	0.000108972	0.000107178	0.000109654	0.000108434	0.00011097	0.000104761	0.000110004	0.000109935	0.000106413	0.000108927
	0.755	0.000109047	0.000123424	0.000117983	0.000117372	0.000116308	0.000121087	0.000117962	0.00011649	0.000117124	0.000114237	0.000115036	0.000118793	0.000117464	0.000115801	0.00010775	0.00011573	0.000108938	0.000116209	0.000112775	0.000102484	9.84218e-05	0.000105511	0.00010855	0.000110673	0.000112629	0.000109746	0.000113118	0.00011432	0.000110512	0.000115327	0.000110263	0.000107501	0.000109548	0.000111396	0.000110193	0.000112556	0.000110991	0.000108075	0.000109026	0.000108292	0.000110464	0.000110287	0.00011138	0.000107513	0.000110547	0.000111106	0.000106862	0.00010957
	0.76	0.000112466	0.000124514	0.000119074	0.000118301	0.000116768	0.000121729	0.000118378	0.000117547	0.00011842	0.000115095	0.000116964	0.000119154	0.0001184	0.000116745	0.000109823	0.000116833	0.000110052	0.000116688	0.000115544	0.000104441	0.00010182	0.000105287	0.000109002	0.00011145	0.000114735	0.000113177	0.000114545	0.000115429	0.000111933	0.000116237	0.000112437	0.000108543	0.000110683	0.000112206	0.000111931	0.000113477	0.000112508	0.000108875	0.000109721	0.000108539	0.000110957	0.000111327	0.000112699	0.000108907	0.00011165	0.000113294	0.000107938	0.000110116
	0.765	0.000116072	0.00012489	0.000120578	0.000119056	0.000117539	0.000121708	0.000119492	0.000118195	0.000119306	0.000116227	0.000118472	0.000119856	0.000119236	0.000118059	0.000111691	0.000117316	0.000110548	0.000117388	0.000116259	0.000105331	0.000104501	0.000109647	0.00010971	0.00011242	0.000115498	0.000112409	0.000115227	0.000116417	0.00011382	0.000117155	0.000113105	0.000110703	0.00011249	0.000112802	0.000112777	0.000113876	0.000112806	0.000111075	0.000111296	0.000109019	0.000111685	0.000110522	0.000113495	0.000111528	0.000112705	0.000114189	0.000108224	0.000111564
	0.77	0.000116959	0.000125336	0.000121539	0.000120337	0.000118093	0.000122905	0.000120846	0.000119124	0.000120302	0.000117629	0.000120638	0.000121269	0.000120093	0.000118555	0.000116843	0.000118765	0.000113009	0.000117654	0.00011721	0.000107303	0.000107048	0.000110932	0.000111071	0.000112849	0.000116043	0.000113332	0.000116198	0.000117203	0.000114234	0.000117968	0.000114056	0.000111469	0.000113135	0.00011293	0.000114661	0.000115361	0.000115412	0.000112378	0.000112335	0.000110165	0.000113188	0.000112132	0.00011512	0.000111964	0.000114026	0.00011509	0.000110007	0.000111636
	0.775	0.000118018	0.000126257	0.000122018	0.000121434	0.000118572	0.000123576	0.000122147	0.000120829	0.000120908	0.000118222	0.000121683	0.000121497	0.000120078	0.000120833	0.000117595	0.00011956	0.000113496	0.000119046	0.000118515	0.000108865	0.000110344	0.000111794	0.000112663	0.000114159	0.000117126	0.000113006	0.000117424	0.00011817	0.00011601	0.000118467	0.000115232	0.000112658	0.000114236	0.000113662	0.00011608	0.00011595	0.000116832	0.000113695	0.000113732	0.000111121	0.000113733	0.000113526	0.000115868	0.000113491	0.000114723	0.000115514	0.000112055	0.000111804
	0.78	0.000119276	0.000127051	0.000122629	0.000122428	0.000120139	0.000124543	0.000122607	0.000123031	0.000121496	0.000119206	0.000122397	0.000122823	0.000122151	0.000122755	0.000118898	0.000121003	0.000114304	0.000120397	0.000119776	0.000109865	0.000113007	0.000112391	0.000113906	0.000115963	0.000117721	0.000114578	0.000118353	0.00011848	0.000116815	0.00011939	0.00011646	0.000113727	0.000116546	0.000115043	0.000117989	0.0001171	0.000117058	0.000115466	0.000114313	0.000112444	0.000114095	0.000113875	0.000116189	0.000115017	0.000116398	0.000115452	0.000112891	0.000113131
	0.785	0.00011986	0.000127587	0.000123461	0.000124128	0.000121506	0.00012512	0.000124124	0.000123398	0.000122092	0.000120488	0.000122638	0.000123103	0.000121056	0.000123066	0.00011943	0.000121406	0.000114971	0.000120495	0.000121244	0.000111018	0.000114213	0.000112826	0.000115977	0.000117381	0.000118749	0.000115473	0.00011855	0.00011982	0.000117006	0.00011994	0.000117176	0.000114079	0.000117069	0.000115815	0.000118684	0.000117665	0.000117082	0.000115849	0.000115207	0.000113523	0.000115177	0.000115068	0.000117059	0.00011561	0.000116978	0.000116294	0.00011359	0.000113828
	0.79	0.000121073	0.000128404	0.000124347	0.000125023	0.000122826	0.000125824	0.000125337	0.000125216	0.000123202	0.000120988	0.000123176	0.00012339	0.000121272	0.000124132	0.000120695	0.000122755	0.000114996	0.00012091	0.000122099	0.000112508	0.000114758	0.000114776	0.000116204	0.000117844	0.000119272	0.000116854	0.00011933	0.000120621	0.000117965	0.000120668	0.000119034	0.000116414	0.00011737	0.000116587	0.000119634	0.000118219	0.000118842	0.000117156	0.000116488	0.000114565	0.000116286	0.000116489	0.000118096	0.000116527	0.000118024	0.000118175	0.00011447	0.000114323
	0.795	0.000121283	0.000129314	0.000125069	0.00012501	0.000123124	0.000126896	0.000125892	0.000125729	0.000124681	0.000121938	0.000124319	0.000123989	0.000122165	0.000124963	0.000122352	0.000123095	0.000115253	0.000121694	0.000122237	0.000113968	0.000116746	0.000116117	0.000117889	0.000119974	0.000120182	0.00011731	0.000120603	0.000121614	0.000117916	0.000121137	0.00011976	0.000117655	0.00011882	0.000117179	0.000120688	0.000120755	0.000120361	0.00011904	0.000117135	0.000115076	0.000117255	0.000116463	0.000118958	0.000117802	0.000117799	0.000119481	0.000115109	0.000115021
	0.8	0.000121952	0.000129612	0.00012703	0.000126013	0.000124185	0.000128331	0.000126205	0.000126895	0.000125261	0.00012275	0.000125332	0.000125211	0.000123148	0.000125517	0.000123097	0.000123412	0.00011599	0.000122746	0.000122692	0.000115076	0.00011795	0.000116585	0.000118747	0.000120364	0.000120495	0.00011848	0.00012143	0.000122196	0.00011831	0.000121372	0.000120131	0.000118783	0.000119885	0.000118095	0.000121155	0.000121255	0.000120919	0.00012037	0.000117564	0.00011626	0.000117954	0.000116834	0.000119665	0.000120163	0.000118644	0.000120151	0.000115902	0.000115899
	0.805	0.000123247	0.000130237	0.000128484	0.0001261	0.000124595	0.000129494	0.000127802	0.000128084	0.000126534	0.000123812	0.000125805	0.000125827	0.00012355	0.000126079	0.00012469	0.000124891	0.000117564	0.000123923	0.000124103	0.000116392	0.000118359	0.000117628	0.000120218	0.00012215	0.000121884	0.000120081	0.000122295	0.000122667	0.000119409	0.000122084	0.000120761	0.000119581	0.000119918	0.000119652	0.000121845	0.000122165	0.000121562	0.000122973	0.000118453	0.000116975	0.000118266	0.000117524	0.000120426	0.000121609	0.0001199	0.000121038	0.00011707	0.000117303
	0.81	0.000123642	0.000131047	0.000128951	0.000125711	0.000125569	0.000129952	0.00012839	0.000128268	0.000128472	0.000123873	0.000127022	0.000126896	0.000124605	0.000127749	0.000126173	0.00012539	0.000118914	0.000124368	0.000124384	0.000117971	0.000120279	0.000117918	0.000121267	0.000122823	0.000122373	0.000121412	0.000123645	0.000123497	0.000121058	0.000123022	0.000122552	0.000120479	0.000120516	0.000120436	0.000122797	0.000122981	0.000122788	0.000123101	0.00011885	0.000118337	0.000119706	0.000118682	0.000120757	0.000122194	0.00012086	0.000120284	0.000117039	0.000118693
	0.815	0.000125296	0.00013145	0.00012942	0.000127673	0.00012744	0.000129681	0.000128777	0.00012947	0.000128203	0.000124999	0.000127793	0.000127652	0.00012508	0.000128301	0.000127219	0.000126307	0.000120099	0.000125511	0.00012536	0.000118824	0.000121442	0.000118497	0.000122166	0.000123085	0.000123331	0.00012214	0.000122395	0.000124663	0.000122081	0.000123542	0.000123044	0.000122857	0.000121779	0.000120745	0.000122764	0.000124025	0.000123012	0.000123528	0.000119996	0.000119547	0.000121014	0.000120722	0.000121553	0.000122801	0.000122079	0.000121192	0.000117845	0.000119878
	0.82	0.000125617	0.000131819	0.000130416	0.000128635	0.000128791	0.000130585	0.000129469	0.000129964	0.000129864	0.000127203	0.000128686	0.000128574	0.000125752	0.000128641	0.000127223	0.000127005	0.000121015	0.000126645	0.000124914	0.000120973	0.00012231	0.000120721	0.000123321	0.000124124	0.000124025	0.000123668	0.000123051	0.000125705	0.000122786	0.000124146	0.000123886	0.000123981	0.000122877	0.000121411	0.000123135	0.000124306	0.000124323	0.000124732	0.000121048	0.000120653	0.000123558	0.000119863	0.000122043	0.000123647	0.00012257	0.000121584	0.000119191	0.000120526
	0.825	0.00012612	0.00013296	0.000131364	0.00012962	0.000130226	0.000131419	0.000131144	0.000130833	0.000130219	0.000128322	0.000129276	0.000128984	0.000126305	0.000129313	0.00012881	0.000127396	0.000121583	0.000127984	0.000125874	0.000122006	0.000124131	0.000121355	0.000124496	0.000125078	0.000124676	0.000125339	0.000123534	0.000126761	0.000123131	0.000124517	0.000124941	0.000125429	0.000124078	0.000123229	0.000124845	0.000125166	0.000124791	0.000125232	0.000121666	0.000122021	0.000125007	0.000120857	0.000122802	0.000124222	0.000123571	0.000121272	0.00012007	0.000121464
	0.83	0.000125696	0.000133672	0.00013228	0.000130809	0.000131058	0.000131748	0.000131478	0.000131816	0.000131131	0.000129977	0.000130026	0.000129087	0.000127271	0.000129538	0.000129481	0.000128413	0.00012313	0.000129663	0.000127113	0.000123731	0.000124436	0.000123409	0.000125457	0.000126629	0.000125445	0.000126582	0.000123418	0.00012722	0.000123876	0.00012536	0.000125954	0.000125883	0.000124482	0.000124092	0.000124704	0.000126203	0.000125878	0.000126542	0.000122299	0.000121935	0.000125528	0.000121451	0.000123176	0.000125217	0.000124462	0.000122332	0.000121908	0.00012148
	0.835	0.000127016	0.000134476	0.000132681	0.000131936	0.000131267	0.000131931	0.000132299	0.000132361	0.000131583	0.000130751	0.000130846	0.000130036	0.000128488	0.000129845	0.0001301	0.000129019	0.000124357	0.000130269	0.000128128	0.000124483	0.000125914	0.000124418	0.000126469	0.000128055	0.000125876	0.000127261	0.000124829	0.000128905	0.000125804	0.000126368	0.000126385	0.000127427	0.000125323	0.000126265	0.000125447	0.000128439	0.00012583	0.000127594	0.000122863	0.000124555	0.000126649	0.000122585	0.000124332	0.000126583	0.000125207	0.000122993	0.000121816	0.000123382
	0.84	0.000127444	0.00013437	0.000133751	0.000132647	0.000131912	0.000132688	0.000133122	0.000133156	0.000132303	0.000130928	0.000131242	0.000130356	0.000128832	0.000131317	0.00013086	0.000129181	0.000124936	0.00013075	0.000129427	0.00012538	0.00012651	0.000126059	0.000127811	0.000128596	0.00012639	0.000128165	0.000126057	0.000128801	0.000126691	0.000127244	0.000127178	0.000128832	0.0001264	0.000126625	0.000126582	0.000128755	0.000127973	0.000127565	0.000124093	0.000124628	0.000127076	0.000123244	0.000125078	0.000127394	0.000125404	0.000123736	0.000122795	0.000124226
	0.845	0.000128254	0.000135094	0.000134061	0.000133566	0.000133168	0.000133745	0.000133237	0.00013358	0.000132824	0.000131485	0.000131881	0.000130562	0.000128851	0.000131575	0.000131201	0.000130829	0.000126393	0.000131612	0.000130246	0.000126104	0.00012666	0.000127087	0.000128426	0.000129405	0.000127401	0.000128696	0.000126935	0.000130168	0.000127773	0.000128012	0.000127592	0.000129702	0.000126803	0.000127435	0.000127497	0.000129567	0.000128576	0.000128231	0.000125086	0.000123993	0.000127705	0.000124217	0.00012585	0.000127348	0.000125892	0.00012457	0.000121866	0.000125006
	0.85	0.000130113	0.000135551	0.000134755	0.000133876	0.000133416	0.000134252	0.00013376	0.000134956	0.000133297	0.000131643	0.000132536	0.00013097	0.000130335	0.00013253	0.000131735	0.000131253	0.000126546	0.000131824	0.000130677	0.000127286	0.000127396	0.000127875	0.000129311	0.00012963	0.000128105	0.000129442	0.000128661	0.000130123	0.000130047	0.000128875	0.000128549	0.000130235	0.000127563	0.000128106	0.000128352	0.000130063	0.000129663	0.000129181	0.000126142	0.000125453	0.000128498	0.000125949	0.000126049	0.000128347	0.000126829	0.000124512	0.000122973	0.000125759
	0.855	0.000131106	0.000136207	0.000135056	0.000134422	0.000134677	0.000134695	0.000134707	0.000135476	0.000134443	0.00013311	0.000132574	0.000131862	0.000131301	0.000133878	0.000132869	0.000132058	0.000127508	0.000132709	0.000131544	0.000129518	0.000128742	0.000128063	0.000129435	0.000130414	0.000128828	0.000130129	0.000129329	0.000130513	0.000130275	0.00012915	0.000128636	0.000130613	0.000128081	0.000129	0.000128804	0.000131012	0.000130395	0.000129975	0.000126623	0.000126614	0.000129014	0.000127352	0.000126467	0.000128501	0.000127452	0.000125364	0.000123696	0.000125456
	0.86	0.000131401	0.000136839	0.000135442	0.000135531	0.000135225	0.000135602	0.000135528	0.000136481	0.000134728	0.000133498	0.000133664	0.000132849	0.000131651	0.000134591	0.000133959	0.000132736	0.00012883	0.000133776	0.000132308	0.00013052	0.000129522	0.000127858	0.000129976	0.000130823	0.000129675	0.000130684	0.000129362	0.000131213	0.000131052	0.000129996	0.000129227	0.000131568	0.000129468	0.000130118	0.000129306	0.000131587	0.000130998	0.000130847	0.000127056	0.000126955	0.000129587	0.000128002	0.00012716	0.000129344	0.00012834	0.000126513	0.000124834	0.000126516
	0.865	0.000132144	0.00013807	0.000136165	0.000135946	0.000136317	0.000136051	0.0001359	0.000137352	0.000135075	0.000134067	0.000134572	0.000133866	0.000132002	0.000134806	0.000134339	0.000133811	0.000130171	0.000134257	0.000132865	0.000131488	0.000129775	0.000129862	0.000130661	0.000131212	0.000130413	0.000131231	0.000130566	0.000131867	0.000132236	0.000130821	0.000130832	0.000131932	0.000129987	0.000130924	0.000131065	0.000131979	0.000131687	0.000131729	0.000127716	0.000127229	0.000130147	0.00012882	0.000127606	0.000130093	0.000129199	0.000126783	0.000125924	0.000126348
	0.87	0.00013288	0.000138827	0.000136619	0.00013633	0.000136445	0.000136407	0.000136443	0.000137381	0.0001357	0.000135346	0.000135197	0.000134592	0.000133444	0.000135154	0.000134717	0.000134319	0.000130568	0.000134989	0.000134015	0.000131915	0.00013072	0.000131203	0.000130792	0.000130768	0.000131579	0.000131125	0.000131511	0.000132661	0.000133127	0.000131608	0.000131295	0.000131731	0.000130625	0.000130698	0.000131104	0.000132556	0.000132039	0.000132779	0.000129332	0.00012757	0.00013093	0.000129518	0.000128238	0.000130616	0.000129539	0.000128082	0.000127277	0.000126838
	0.875	0.000133386	0.000139537	0.000137072	0.000136999	0.00013765	0.000136809	0.000137085	0.000138109	0.000135951	0.000135478	0.000135672	0.000135417	0.000134134	0.000135772	0.000135312	0.000135187	0.000132902	0.0001351	0.000135348	0.00013268	0.000130718	0.000130783	0.000131878	0.000131107	0.00013173	0.000132026	0.000132397	0.000133508	0.000134168	0.000132474	0.000132548	0.00013269	0.000131222	0.000131465	0.000131492	0.000133185	0.000132439	0.000132837	0.000129568	0.000128737	0.00013111	0.000129416	0.000128846	0.000132108	0.000130294	0.00012885	0.000127289	0.000127549
	0.88	0.000134194	0.000139448	0.000137866	0.000137702	0.000137893	0.000137564	0.000137167	0.000137888	0.000136879	0.000136417	0.000136223	0.00013614	0.000135494	0.00013703	0.000135838	0.000136305	0.000134074	0.000135464	0.000135414	0.000133234	0.00013167	0.000131651	0.000132191	0.000132668	0.000132133	0.000132456	0.000133043	0.000134067	0.00013459	0.000132903	0.00013319	0.00013308	0.000132166	0.000132467	0.000131864	0.000133808	0.000132936	0.00013345	0.000129494	0.000130381	0.000131652	0.000129896	0.000129351	0.000133333	0.000130673	0.000129048	0.000127633	0.000128808
	0.885	0.000134569	0.000140491	0.000138381	0.000137984	0.000138585	0.000138138	0.000138038	0.000138712	0.000137269	0.000137927	0.000136473	0.000136736	0.000136218	0.00013763	0.000136382	0.000136529	0.000134655	0.000135695	0.000136131	0.000134958	0.000132945	0.00013205	0.000132671	0.000132871	0.000132826	0.000134001	0.000133672	0.00013459	0.000135611	0.000133553	0.000133752	0.000133468	0.000133102	0.000132794	0.000132823	0.000134576	0.000134094	0.000134094	0.0001311	0.000130853	0.000132393	0.000131324	0.000130167	0.000133136	0.000131252	0.000129486	0.000128373	0.000129649
	0.89	0.000134915	0.000140532	0.000139599	0.000138739	0.000138838	0.000138849	0.000138715	0.000139467	0.00013768	0.000138936	0.000137222	0.000138205	0.000137139	0.000137982	0.000136866	0.000137221	0.000135671	0.000136431	0.0001366	0.000135658	0.000133645	0.000132607	0.00013352	0.000133905	0.000133571	0.000134952	0.000133877	0.000135107	0.000135793	0.000134402	0.000134454	0.000134237	0.000133664	0.000132719	0.000134266	0.000135392	0.00013428	0.000134264	0.000133463	0.000133451	0.000132552	0.000132329	0.000130616	0.00013388	0.000131636	0.000130854	0.000129245	0.000129902
	0.895	0.000136364	0.000141538	0.000139789	0.000139085	0.000139036	0.000139597	0.000139003	0.000139974	0.000138393	0.000139594	0.000137725	0.000138967	0.000138145	0.000138289	0.000137302	0.00013762	0.000136421	0.000137012	0.000137112	0.000136155	0.000134286	0.00013457	0.000134125	0.000134384	0.000134292	0.000136055	0.000134545	0.000135324	0.000136214	0.00013497	0.000134352	0.000135264	0.000134286	0.000133721	0.000134606	0.000136449	0.000134516	0.000134767	0.000133973	0.000134447	0.000133329	0.000131809	0.000131733	0.000134942	0.000132146	0.000131056	0.000129863	0.000131629
	0.9	0.000137127	0.00014216	0.000140675	0.000140696	0.000139375	0.000140065	0.000139829	0.000140454	0.000139078	0.000139838	0.000138316	0.000139414	0.000138124	0.000139286	0.000138345	0.000137775	0.000137567	0.000137258	0.000137839	0.000136687	0.000135022	0.000135378	0.000134841	0.000135104	0.000134834	0.000136576	0.000135413	0.000136755	0.000136796	0.000134852	0.000135127	0.000135319	0.000135241	0.000134702	0.00013597	0.000136565	0.000135685	0.000135404	0.00013526	0.000133513	0.000133787	0.000132962	0.000132249	0.000135707	0.000132294	0.000131771	0.000130268	0.000132229
	0.905	0.000137314	0.000142121	0.000141166	0.000140653	0.000140188	0.000140123	0.00014025	0.0001406	0.000139583	0.000140824	0.000139681	0.000139852	0.000138776	0.000139596	0.000139256	0.000138513	0.00013847	0.000137938	0.000138558	0.000137298	0.000135314	0.000135665	0.00013616	0.000135664	0.000135065	0.000137282	0.000135529	0.000137559	0.00013743	0.000135988	0.000134842	0.000136097	0.000135352	0.000135053	0.000136491	0.000136965	0.000136135	0.000136232	0.000135996	0.000134352	0.000134578	0.000133511	0.000132565	0.000135795	0.00013342	0.000132227	0.000130874	0.000132576
	0.91	0.000137438	0.00014256	0.000141516	0.000141828	0.000140809	0.000140832	0.000140414	0.000141328	0.000140236	0.000141536	0.00014037	0.000140483	0.000139379	0.000139621	0.000139416	0.00013902	0.000138734	0.000138736	0.000139102	0.000137968	0.000135726	0.000136331	0.000136157	0.000136037	0.000135551	0.000137854	0.000136654	0.000137866	0.000137801	0.000136683	0.000135782	0.000136978	0.00013583	0.000136158	0.000136666	0.000138284	0.000136388	0.000136811	0.000136166	0.000135726	0.000135092	0.000133583	0.000133107	0.000136711	0.000134051	0.00013223	0.000131565	0.000133158
	0.915	0.000138765	0.000143358	0.000141963	0.000142773	0.000141705	0.000141045	0.000141268	0.000141851	0.000140962	0.000142358	0.00014094	0.000140696	0.000139701	0.000140434	0.000140398	0.000139885	0.000139344	0.000139812	0.000139903	0.000138528	0.000136995	0.000137255	0.000137651	0.000137035	0.000136565	0.000138219	0.000137553	0.000138453	0.00013837	0.000137852	0.000136234	0.000137513	0.000136986	0.000136936	0.000136729	0.000138407	0.000137095	0.000137353	0.000136977	0.000136856	0.000135936	0.0001342	0.000133726	0.000137344	0.00013377	0.000133496	0.000132229	0.000134181
	0.92	0.000140155	0.000144114	0.000142804	0.000142293	0.000142134	0.000141566	0.00014172	0.00014235	0.000142069	0.000142292	0.000141743	0.000141444	0.000140026	0.00014092	0.000140946	0.000140391	0.000140232	0.000140372	0.000140156	0.000139064	0.000138126	0.000137219	0.000137666	0.000137718	0.000137191	0.000138452	0.000137902	0.000139226	0.000139211	0.000138259	0.000137025	0.00013823	0.000138347	0.000137601	0.000136829	0.000138987	0.000137935	0.000138013	0.000137535	0.000137452	0.000136596	0.000134759	0.000134475	0.000138648	0.000134467	0.000133858	0.000132359	0.000134407
	0.925	0.000140548	0.000144212	0.000143192	0.000143492	0.000142477	0.000142736	0.00014279	0.00014275	0.000142754	0.000143323	0.000142339	0.000141616	0.00014054	0.000141297	0.000141682	0.000140924	0.000141892	0.000140201	0.000140549	0.000139832	0.000139405	0.000138112	0.000138687	0.000138393	0.0001382	0.000139202	0.000138548	0.000139981	0.000139772	0.000138782	0.000137503	0.000138911	0.000139304	0.000137501	0.000138257	0.000139407	0.000138415	0.000138672	0.000138212	0.000138229	0.000137796	0.000135835	0.000135612	0.000139092	0.000134695	0.000134658	0.000132918	0.000135308
	0.93	0.000141254	0.000144685	0.000143722	0.000143956	0.000142878	0.000142564	0.000143564	0.000143282	0.000143363	0.000143408	0.000143198	0.00014236	0.000141242	0.000141538	0.000141977	0.000141321	0.000142503	0.000141144	0.000141445	0.000140181	0.000139561	0.00013936	0.000138869	0.000139274	0.000138832	0.000140025	0.000139623	0.000140269	0.000140244	0.000138888	0.000138549	0.000138865	0.000139804	0.000137694	0.000139056	0.000139767	0.000139196	0.000139445	0.000138575	0.000138714	0.000138501	0.000136037	0.000136383	0.00013937	0.000134827	0.000135933	0.000133483	0.000135911
	0.935	0.000141704	0.000145419	0.000144195	0.00014459	0.000143352	0.000143876	0.000144029	0.000143448	0.000143657	0.000143811	0.000143373	0.000142482	0.000142096	0.000142242	0.000142745	0.000141711	0.00014305	0.000141351	0.000142107	0.000140565	0.000139898	0.000139637	0.000139921	0.000139533	0.000139303	0.000140618	0.000139784	0.000140179	0.00014096	0.000139269	0.000139739	0.000139203	0.000140097	0.000138503	0.00013934	0.000140257	0.00013961	0.000139583	0.000139571	0.000139295	0.000139306	0.000136852	0.00013642	0.000139779	0.000135611	0.000136828	0.00013433	0.000135881
	0.94	0.000141687	0.000145537	0.000144731	0.000145171	0.000144116	0.000144423	0.000144624	0.00014381	0.00014397	0.00014371	0.000143421	0.000143152	0.000143359	0.000142567	0.000143326	0.000142211	0.000143487	0.000141808	0.000141952	0.00014136	0.000140589	0.000140453	0.000140539	0.00013981	0.000139734	0.000140921	0.000139961	0.000140075	0.000141464	0.000139877	0.000139604	0.00013992	0.000140582	0.000138973	0.000139678	0.000140632	0.000140177	0.000139803	0.000139894	0.000140286	0.00013953	0.000137303	0.000137504	0.000140243	0.000136322	0.000136983	0.000134579	0.000137281
	0.945	0.000142023	0.000145857	0.000145936	0.000145884	0.000144836	0.000144255	0.000144866	0.00014476	0.000144531	0.000144431	0.000144004	0.000143977	0.00014359	0.00014294	0.000143477	0.00014313	0.000144234	0.000143398	0.000142358	0.000141931	0.000140712	0.00014069	0.000140992	0.000140752	0.000139889	0.00014134	0.000140855	0.000140749	0.000141551	0.000140498	0.000140371	0.000140729	0.000140798	0.00013957	0.000140683	0.0001405	0.000140944	0.000140369	0.000140549	0.00014054	0.000140544	0.000137671	0.000137282	0.00014081	0.00013728	0.000137601	0.000135697	0.00013818
	0.95	0.000142648	0.000146498	0.000146049	0.000146934	0.000145133	0.000144683	0.000145297	0.000145367	0.000144625	0.000144852	0.000144359	0.000144555	0.000144276	0.000143326	0.000144349	0.000143476	0.000144639	0.000143843	0.000142742	0.000142581	0.000141417	0.000141215	0.000141547	0.000141494	0.000140758	0.000141462	0.000141496	0.000141518	0.000142129	0.000141008	0.000142001	0.000140867	0.000141003	0.000140088	0.000140681	0.000141511	0.000141634	0.000140463	0.00014075	0.000141432	0.000140277	0.00013851	0.000138466	0.000141462	0.000137783	0.000137778	0.000135825	0.000138796
	0.955	0.000143059	0.000147129	0.000146554	0.000146792	0.000145783	0.000145292	0.000145715	0.000145624	0.000144977	0.000144634	0.000144925	0.00014476	0.000144719	0.00014371	0.00014506	0.000143872	0.000144765	0.000144205	0.000143531	0.000142923	0.000142226	0.000141425	0.000142035	0.000142236	0.000141149	0.000142001	0.000141682	0.000141592	0.000142804	0.000141469	0.000142264	0.000141791	0.000141425	0.000140665	0.000141243	0.00014204	0.000142228	0.000140758	0.000141537	0.00014124	0.000140638	0.000139442	0.000139214	0.000141887	0.00013795	0.000138619	0.000136596	0.00013904
	0.96	0.000143452	0.000147235	0.000146435	0.000147791	0.000146095	0.000146014	0.000145895	0.000145982	0.000145027	0.000145059	0.000145498	0.000144838	0.000144784	0.000144442	0.000145589	0.000144413	0.000145383	0.000144794	0.000143746	0.00014368	0.000142949	0.00014222	0.000142093	0.000142414	0.000142038	0.000142444	0.000142375	0.000141779	0.000143097	0.000142083	0.000143094	0.000142339	0.00014217	0.000141314	0.000141912	0.000142974	0.00014262	0.000141408	0.00014228	0.000142788	0.000140547	0.000139652	0.000139822	0.000142623	0.000138531	0.000139082	0.000137569	0.000139456
	0.965	0.000144036	0.000148099	0.000146845	0.000148234	0.000146967	0.000146148	0.000146469	0.000146316	0.000145817	0.000145856	0.000145757	0.000145503	0.000145372	0.000145653	0.00014606	0.00014485	0.000145826	0.000145217	0.000144212	0.000144409	0.000143942	0.000142402	0.000143522	0.000143241	0.000142162	0.000142787	0.000142815	0.000142691	0.000143822	0.000142486	0.000143652	0.000142792	0.000142477	0.000141768	0.000142476	0.0001434	0.00014364	0.000141994	0.000142351	0.000142903	0.000141877	0.000141081	0.000140019	0.000142971	0.00013936	0.000139474	0.000138064	0.000140031
	0.97	0.000144627	0.000148392	0.000147634	0.000148742	0.000147051	0.000146887	0.000146916	0.00014688	0.000146601	0.000146424	0.000146078	0.000145973	0.0001458	0.000146376	0.000146287	0.000145479	0.000146493	0.000145197	0.000144171	0.000144806	0.000144646	0.000143247	0.000143769	0.000143659	0.000142422	0.000143278	0.00014326	0.000143425	0.000144176	0.000143054	0.000144937	0.000143301	0.000143019	0.000143046	0.0001426	0.000144554	0.000143155	0.000142911	0.000143132	0.000143584	0.000142493	0.000141128	0.000140533	0.00014363	0.000139858	0.000140086	0.000138204	0.00014049
	0.975	0.000145057	0.000148524	0.000148113	0.000148971	0.000147357	0.000147412	0.000147266	0.000147692	0.00014672	0.000146895	0.000146982	0.000146567	0.000145945	0.000146879	0.000146208	0.000146177	0.000146811	0.000145382	0.000144859	0.000145575	0.000145402	0.000143653	0.000144329	0.000144328	0.000142954	0.000143952	0.000143487	0.000143805	0.000144294	0.000143369	0.000145412	0.000143804	0.000143987	0.0001438	0.000144084	0.00014471	0.00014394	0.000143204	0.000143219	0.000144091	0.000143042	0.000141902	0.000140795	0.000143964	0.000140012	0.000140517	0.00013873	0.000141
	0.98	0.000145624	0.000148853	0.000148319	0.000149293	0.00014791	0.000148024	0.000148223	0.000148192	0.000147148	0.000147615	0.000147384	0.000147411	0.000146062	0.00014767	0.000146821	0.000146874	0.000146835	0.00014575	0.000145459	0.000145885	0.000145922	0.000144031	0.000144242	0.000145439	0.000143619	0.000144545	0.000144172	0.00014379	0.000144562	0.000144051	0.000145829	0.000144219	0.000144585	0.000143778	0.000144358	0.000145021	0.00014419	0.000143266	0.000143363	0.000144548	0.000143888	0.000142595	0.000141343	0.000144389	0.00014052	0.000141353	0.000139641	0.000141398
	0.985	0.000145895	0.000149407	0.000148759	0.000149772	0.000148037	0.000148487	0.000148671	0.000148493	0.000147715	0.000147528	0.000148181	0.000147634	0.000146632	0.00014814	0.000147555	0.000147035	0.000147461	0.000146407	0.00014566	0.000146567	0.000146288	0.000144632	0.000145032	0.00014539	0.000143945	0.000145157	0.000144855	0.00014425	0.00014488	0.000144572	0.000145992	0.00014462	0.000145093	0.000144449	0.000144834	0.000145776	0.000144629	0.000143797	0.000143908	0.000144848	0.000144566	0.0001432	0.000141357	0.000144789	0.0001416	0.000141796	0.000140081	0.000142212
	0.99	0.0001464	0.000149555	0.00014917	0.000150111	0.000148844	0.000148604	0.000149177	0.000148699	0.000148085	0.000148098	0.000148579	0.000148149	0.000147025	0.000148348	0.000147841	0.000146954	0.000147729	0.000146491	0.000145891	0.00014708	0.000146275	0.000145482	0.000145766	0.000146136	0.000144675	0.000145678	0.00014584	0.000145595	0.000145636	0.000145293	0.000146126	0.000145258	0.000145695	0.000144842	0.000145557	0.000146059	0.000145104	0.00014399	0.000143397	0.000145273	0.000144482	0.000143778	0.000141781	0.000145023	0.000142005	0.000142175	0.00014078	0.000142667
	0.995	0.000147137	0.000149635	0.000149599	0.00014992	0.000149502	0.000149012	0.000149635	0.000149074	0.000148308	0.000148413	0.000148928	0.000148633	0.000147631	0.0001488	0.000148394	0.000147536	0.000148215	0.000147057	0.000146398	0.000147387	0.000146894	0.000146012	0.00014612	0.000146128	0.000145053	0.000145707	0.000146338	0.000145787	0.000146477	0.000145869	0.000146598	0.000145698	0.000146333	0.000145764	0.000145774	0.000146577	0.000145103	0.000144631	0.000142932	0.000145901	0.000144917	0.000144396	0.000142655	0.000145173	0.000142461	0.000142683	0.000141119	0.000143323
	1	0.000147501	0.000149872	0.000149939	0.000150721	0.000149611	0.000149209	0.000150036	0.000149418	0.000148678	0.000148908	0.000149128	0.000148918	0.00014809	0.000149228	0.00014888	0.000148084	0.000148648	0.000147501	0.000146745	0.000147517	0.000147388	0.000146327	0.000146278	0.000146719	0.000145515	0.000146094	0.000146373	0.000146245	0.000146572	0.000146017	0.000146466	0.000146587	0.000146335	0.000146072	0.000146347	0.000146734	0.000145121	0.000145565	0.000144041	0.000146107	0.000145509	0.000144515	0.000143585	0.000145561	0.000143007	0.000143248	0.000141326	0.000143809
	1	0.000147278	0.000149713	0.000149849	0.000150745	0.00014968	0.00014947	0.000149773	0.000149507	0.000148555	0.000148861	0.000149042	0.000148937	0.000148361	0.000149106	0.000148736	0.00014814	0.000148683	0.000147699	0.000146793	0.000147633	0.000147241	0.000146352	0.000146184	0.000146405	0.000144942	0.000146251	0.000146333	0.000146025	0.000146192	0.000146379	0.000146605	0.000146466	0.000146191	0.00014662	0.000146543	0.000146885	0.00014563	0.000145455	0.000144232	0.000146605	0.000145517	0.000144806	0.000144057	0.00014517	0.000143336	0.000143165	0.000141621	0.00014347
	0.995	0.000147177	0.000149517	0.000149655	0.000150354	0.000149637	0.000149244	0.000149518	0.000149043	0.000148479	0.00014838	0.000148768	0.000148918	0.000148599	0.000148961	0.000148309	0.000147321	0.000148381	0.000147756	0.00014621	0.000147156	0.000147096	0.000146692	0.000145862	0.000145879	0.000144794	0.000145927	0.000145676	0.000145574	0.000146264	0.000145947	0.000146634	0.000146154	0.000146007	0.000145982	0.000146198	0.000146603	0.000145664	0.000144995	0.000144028	0.000145961	0.000145113	0.000144598	0.000143491	0.000144954	0.000142584	0.00014227	0.000141513	0.000142892
	0.99	0.000147331	0.000149232	0.000149269	0.000149743	0.000149308	0.000148748	0.000149238	0.000148542	0.000147833	0.000148047	0.000148996	0.000148522	0.000148288	0.000148662	0.000147994	0.000146633	0.000148133	0.000147373	0.000145779	0.000146864	0.000146649	0.00014629	0.000145475	0.000145384	0.000144972	0.000145789	0.000145851	0.000145454	0.000145896	0.000145627	0.000146074	0.000145878	0.000145271	0.000145486	0.000145782	0.000146193	0.000145608	0.000144857	0.000143409	0.000145467	0.000144503	0.000144304	0.000143067	0.000144674	0.000141998	0.000142113	0.00014207	0.000142375
	0.985	0.000146919	0.000149583	0.000149092	0.000149423	0.000148755	0.000148685	0.000148927	0.000148216	0.000147507	0.000148009	0.000148522	0.000148265	0.00014792	0.000148405	0.000147703	0.000146396	0.000147755	0.000147339	0.00014551	0.000146256	0.000146312	0.000145956	0.000145584	0.000144937	0.000144565	0.000145315	0.000145449	0.000145202	0.000145604	0.00014518	0.000145619	0.000145594	0.000144915	0.000144866	0.000145399	0.000145839	0.000144875	0.000144858	0.00014357	0.000145122	0.000144076	0.000144125	0.000142451	0.000144649	0.000141317	0.000141902	0.000141733	0.000142415
	0.98	0.000146243	0.000148786	0.000148899	0.000148903	0.000148556	0.000148546	0.000148745	0.000147817	0.000147209	0.000147801	0.000148386	0.00014781	0.000147514	0.000148152	0.000147394	0.000145952	0.000147174	0.000147114	0.000145234	0.000145863	0.000145994	0.000144963	0.000145129	0.000144593	0.000144588	0.000144769	0.000144966	0.000144641	0.000145759	0.000144941	0.000145194	0.000145088	0.00014443	0.00014459	0.000144972	0.000145482	0.000144326	0.000144399	0.000143089	0.000144863	0.000143431	0.000143599	0.000142209	0.000144254	0.000140679	0.000141665	0.000141313	0.00014168
	0.975	0.000145527	0.000148315	0.000148402	0.00014889	0.000148269	0.000147866	0.000148327	0.000147531	0.00014652	0.000147123	0.00014786	0.000147434	0.000147075	0.000147747	0.000147034	0.000145539	0.000146961	0.000146619	0.000144779	0.00014549	0.000145324	0.000144503	0.000144656	0.000144296	0.000143753	0.000144181	0.000144271	0.000144098	0.00014503	0.000144423	0.00014489	0.000144615	0.000143775	0.000144452	0.000144582	0.000145011	0.000143515	0.000143934	0.00014286	0.000144716	0.00014321	0.000143098	0.0001415	0.000143666	0.0001403	0.000141619	0.000140852	0.000141111
	0.97	0.000145812	0.000148222	0.000148221	0.000148344	0.000147733	0.000147577	0.000148034	0.000147308	0.000145711	0.000146861	0.000147558	0.000147072	0.000146514	0.000147593	0.000146711	0.000145219	0.000146782	0.000146194	0.000144585	0.000145078	0.000145215	0.000144217	0.000144219	0.000143871	0.000143471	0.000143888	0.000143684	0.000143715	0.000144525	0.000144295	0.000144199	0.000144196	0.000143381	0.000143909	0.000143974	0.000144733	0.000142524	0.000143609	0.000142433	0.000143704	0.000142753	0.000142756	0.000141054	0.000142933	0.000139729	0.000141082	0.000140373	0.000140596
	0.965	0.00014558	0.000147651	0.000147822	0.000147943	0.000147462	0.000146745	0.00014752	0.000147054	0.000145512	0.000146136	0.000146896	0.000146723	0.000146207	0.000147561	0.000146336	0.000144591	0.000146321	0.000145982	0.000144964	0.000144671	0.000144821	0.000144321	0.000143775	0.000143402	0.000143246	0.000143587	0.000142875	0.000143301	0.000144128	0.000143841	0.000143725	0.000143795	0.000143146	0.000144272	0.000143676	0.000144563	0.000141455	0.000143117	0.000141888	0.000143054	0.00014229	0.000141863	0.000139873	0.000142367	0.00013948	0.000140563	0.000139737	0.000140236
	0.96	0.000145054	0.000147339	0.00014768	0.000147405	0.000146819	0.000146401	0.000147271	0.000146453	0.000145186	0.000145698	0.000146661	0.000146262	0.000145839	0.000146886	0.000146031	0.000144242	0.000146033	0.000145575	0.000145028	0.000144257	0.000144306	0.000143614	0.000143192	0.000143081	0.000142774	0.000143204	0.000142623	0.000143051	0.00014307	0.00014352	0.000143593	0.000142996	0.000142586	0.00014299	0.000143422	0.00014421	0.000141823	0.000142394	0.000141249	0.000142882	0.000141446	0.000141735	0.000139347	0.000142075	0.00013877	0.000139954	0.000139407	0.000139604
	0.955	0.0001447	0.000146888	0.000147553	0.000147141	0.000146509	0.000145832	0.000146812	0.000146022	0.000144788	0.000145162	0.000146246	0.000145967	0.000145629	0.000146578	0.00014558	0.00014365	0.000145713	0.0001453	0.000144536	0.000143791	0.000143586	0.000143136	0.000142529	0.000142701	0.000141972	0.000142677	0.000142272	0.000142737	0.000142843	0.000143079	0.00014293	0.000142564	0.000142285	0.000142408	0.000142929	0.000143116	0.000141885	0.000142256	0.000140877	0.000142894	0.000141194	0.0001414	0.000138658	0.000141565	0.000138832	0.00013956	0.000138608	0.000139
	0.95	0.000144118	0.000146448	0.00014719	0.000146496	0.000146025	0.000145515	0.00014642	0.000145779	0.000144269	0.000144922	0.000145962	0.000145573	0.000145105	0.000146202	0.000145605	0.000143628	0.000145301	0.000144763	0.00014422	0.000143392	0.000142979	0.000142886	0.000141938	0.000142492	0.000141439	0.000142059	0.000141809	0.000142387	0.000142387	0.000142569	0.00014231	0.000142036	0.000142059	0.0001422	0.000142228	0.000142503	0.000141353	0.000141794	0.000140093	0.00014231	0.000140835	0.000141005	0.00013835	0.000141538	0.000138314	0.000139057	0.000138077	0.000138375
	0.945	0.000143875	0.000145906	0.000146995	0.000145877	0.000146102	0.000144991	0.000146262	0.000145415	0.000143526	0.000144471	0.00014537	0.000145184	0.000144966	0.000145861	0.000144595	0.000142537	0.000144545	0.00014447	0.000144038	0.000143177	0.000142209	0.000142323	0.000141678	0.000141879	0.000140772	0.000141752	0.000141169	0.000141699	0.000141635	0.000142266	0.000142436	0.000141527	0.000141605	0.00014181	0.000141252	0.000142036	0.000140667	0.000141404	0.000139689	0.000141826	0.000140603	0.00014033	0.000137861	0.000140997	0.000138019	0.000138773	0.000137212	0.000137989
	0.94	0.000143283	0.000145521	0.000146644	0.000145815	0.000145569	0.000144278	0.000145755	0.000144958	0.000143265	0.000144014	0.000144923	0.000144793	0.000143902	0.000145263	0.000144086	0.000142102	0.000143985	0.000144042	0.000143552	0.00014295	0.000141864	0.00014199	0.000140805	0.000141251	0.000140111	0.000141249	0.000140857	0.000141252	0.00014175	0.00014124	0.000141856	0.000141105	0.000140899	0.000141283	0.000140943	0.00014178	0.00014025	0.000141045	0.000138752	0.000141279	0.000140208	0.000139879	0.000137665	0.000140889	0.000137526	0.000138247	0.000137132	0.000136932
	0.935	0.000142766	0.000145111	0.000146007	0.00014557	0.000145294	0.000144041	0.000145334	0.000144656	0.000143198	0.000143684	0.000144296	0.000144424	0.000143477	0.000144477	0.000143672	0.000141724	0.000143392	0.000143849	0.000143063	0.000142507	0.000141107	0.000141446	0.000140503	0.000140794	0.000139552	0.00014093	0.00014033	0.000140742	0.000141352	0.000141041	0.000141254	0.000140873	0.000140706	0.000140759	0.000140558	0.000140761	0.000139495	0.000140321	0.000138989	0.000140872	0.00013962	0.000139274	0.000137465	0.000140209	0.000137232	0.000137718	0.000136542	0.000136726
	0.93	0.000142328	0.000144881	0.000145729	0.00014489	0.000144808	0.000143667	0.000145056	0.000144179	0.000142539	0.00014329	0.000143872	0.000143785	0.000142737	0.000143634	0.000142913	0.000140947	0.000143145	0.000143124	0.000143119	0.000141976	0.000141131	0.000140899	0.000140309	0.000140746	0.000138823	0.000140755	0.000139763	0.000140203	0.000140815	0.000140748	0.000140621	0.000140533	0.000139771	0.000140433	0.000140045	0.000140092	0.000139143	0.000139814	0.000137041	0.000139906	0.000138795	0.000138441	0.000137118	0.000139696	0.00013625	0.000137139	0.000135796	0.000136251
	0.925	0.000141687	0.000144308	0.000145599	0.00014431	0.000144408	0.000143381	0.000144824	0.00014305	0.000141911	0.000143043	0.0001438	0.000143272	0.000141953	0.00014278	0.000142688	0.000140591	0.000142489	0.000142708	0.000142094	0.000141667	0.000140654	0.00014073	0.000139969	0.000139913	0.000138696	0.000140194	0.000139511	0.00013993	0.000140326	0.000140338	0.000140231	0.000140246	0.000139437	0.000139835	0.000139172	0.000139677	0.000138483	0.000139317	0.000136685	0.00013953	0.000137616	0.000137994	0.000136915	0.000139041	0.000135623	0.000136184	0.000135544	0.000135146
	0.92	0.000141435	0.000143809	0.0001448	0.000143716	0.000144055	0.000143052	0.00014419	0.000143331	0.000141478	0.000142605	0.000143053	0.000142823	0.000141441	0.000143045	0.000142344	0.000140593	0.000141794	0.000142184	0.000140719	0.000140999	0.000140263	0.000140005	0.00013943	0.000139806	0.000138025	0.000140015	0.000138925	0.000139018	0.0001399	0.00013953	0.000139975	0.000139382	0.000138768	0.000139045	0.000139051	0.000139492	0.000137906	0.000138689	0.000135112	0.000139209	0.000136783	0.000137675	0.000135685	0.000138631	0.000135091	0.000135854	0.000134637	0.000134801
	0.915	0.000140812	0.00014323	0.000144339	0.000143333	0.00014334	0.000142505	0.000143785	0.000142792	0.00014073	0.000141946	0.000142769	0.000142292	0.000141104	0.000142488	0.000142018	0.000140157	0.000141908	0.00014168	0.000139894	0.000140564	0.000139876	0.000139682	0.000139238	0.000139004	0.000137495	0.000139293	0.000138496	0.000138275	0.000139327	0.000139257	0.000139353	0.00013895	0.000138629	0.000138465	0.000138712	0.000138667	0.000137199	0.000137993	0.00013454	0.000138777	0.000136869	0.000137614	0.00013537	0.00013796	0.000134618	0.000135233	0.000134521	0.000134595
	0.91	0.000140381	0.000142702	0.000143569	0.000142976	0.000142644	0.000141787	0.000143442	0.0001423	0.000140352	0.000141735	0.000142131	0.000141908	0.000140945	0.000141798	0.000141216	0.000139661	0.000141501	0.00014129	0.000139346	0.000139842	0.0001393	0.000139042	0.000138722	0.000138535	0.00013697	0.000138949	0.000137951	0.00013814	0.000138499	0.000138688	0.000138257	0.000138629	0.000138163	0.0001383	0.000138045	0.000138186	0.000136933	0.000137637	0.000133893	0.000138217	0.000136788	0.000137232	0.000134256	0.000137477	0.000134283	0.000134899	0.000133624	0.000133523
	0.905	0.000139702	0.000142548	0.000143045	0.000142844	0.00014181	0.000141407	0.000143034	0.000141998	0.000139946	0.000140975	0.00014161	0.000141304	0.000140301	0.000141059	0.000140941	0.000138927	0.000141235	0.000140713	0.000139153	0.000139196	0.00013866	0.000138417	0.000138165	0.000138018	0.000136049	0.00013876	0.000137454	0.000137821	0.00013782	0.000138164	0.000137462	0.000138078	0.000137675	0.000137535	0.000137215	0.000137525	0.000136281	0.000136658	0.0001338	0.000137744	0.000136464	0.000136445	0.000133644	0.000136737	0.000133529	0.000134262	0.000133337	0.000133262
	0.9	0.000139002	0.000141912	0.000142678	0.000142456	0.000141676	0.000141252	0.000142628	0.000141174	0.000139344	0.000140353	0.000141122	0.00014079	0.000140043	0.000140629	0.000140501	0.000138471	0.000140402	0.000140217	0.000138532	0.000138742	0.000138403	0.000137952	0.000137648	0.000137607	0.000135316	0.000138208	0.000136834	0.000137365	0.000137022	0.000137274	0.0001368	0.000137738	0.000136564	0.000137362	0.0001367	0.000136741	0.000136179	0.000136443	0.000134131	0.000137047	0.000135641	0.000136069	0.000133374	0.000136502	0.000133071	0.000134043	0.000132907	0.000132726
	0.895	0.000138409	0.000141627	0.00014246	0.000141898	0.00014096	0.000140804	0.000142126	0.00014056	0.000139116	0.000139635	0.000140488	0.000140247	0.000139404	0.000140061	0.000140057	0.000138177	0.000139609	0.00013974	0.00013854	0.000138177	0.000138186	0.000137238	0.000137077	0.000137187	0.000134837	0.000137332	0.000136166	0.000136846	0.000136777	0.000136927	0.000136434	0.000137097	0.000136347	0.00013664	0.000136397	0.00013636	0.000135246	0.000135798	0.000132922	0.000136527	0.000134995	0.000135513	0.000132631	0.000136081	0.000132431	0.000133347	0.000131653	0.000131849
	0.89	0.0001381	0.00014109	0.000142264	0.000141669	0.000140027	0.000140004	0.00014181	0.00014008	0.00013841	0.000139382	0.000140021	0.00013973	0.000139106	0.000139202	0.000139227	0.000137825	0.000139428	0.000139661	0.00013798	0.000137681	0.000137723	0.000136609	0.000136752	0.00013667	0.000134709	0.000136766	0.000135846	0.000136117	0.000136611	0.000136187	0.00013597	0.000136488	0.000135966	0.000135614	0.000135779	0.00013569	0.000134574	0.000135654	0.000132821	0.000136226	0.000134134	0.000134975	0.000131876	0.00013516	0.000132331	0.000132618	0.000131341	0.000131083
	0.885	0.000137645	0.000140562	0.000141639	0.000141142	0.000140006	0.000139623	0.000141487	0.0001394	0.00013811	0.000138719	0.000139729	0.000139096	0.000138157	0.000138737	0.000138384	0.00013725	0.000138873	0.000138724	0.000137224	0.000137449	0.000137338	0.000136006	0.000136191	0.000136097	0.000133811	0.000136251	0.000134933	0.000135737	0.0001359	0.000135878	0.000135365	0.000135637	0.000134896	0.000134729	0.000135312	0.000135194	0.000134026	0.000135053	0.000132199	0.000135437	0.000133665	0.000134114	0.000131516	0.00013466	0.000132107	0.00013184	0.000130549	0.00013038
	0.88	0.000137285	0.00013995	0.000141245	0.000140418	0.000139597	0.000138925	0.000140457	0.000139246	0.000137794	0.000138341	0.000139153	0.000139021	0.000137227	0.000138173	0.000137985	0.000136807	0.000138355	0.000138253	0.000136824	0.000136909	0.000137014	0.0001351	0.000135059	0.000135608	0.000133478	0.000135821	0.000134347	0.000134926	0.000136023	0.000135599	0.000135195	0.000134743	0.000134484	0.000134177	0.00013458	0.000134599	0.000133607	0.000134835	0.000132606	0.000135054	0.000132636	0.000133649	0.000130583	0.000134258	0.000131793	0.000131246	0.000130197	0.000129951
	0.875	0.000137166	0.000139183	0.00014062	0.000140085	0.000138677	0.000138474	0.000139872	0.000138641	0.000137221	0.000137793	0.000138596	0.00013831	0.000137147	0.000137785	0.000137538	0.000136451	0.000137935	0.000137616	0.000136872	0.000136339	0.000136512	0.000134999	0.00013451	0.000134853	0.000133023	0.000135017	0.000133921	0.000134252	0.000135162	0.000135079	0.000134434	0.000133835	0.000133806	0.000133726	0.000133808	0.000134092	0.000133221	0.00013415	0.000131359	0.000133704	0.000133557	0.000133064	0.000129887	0.000133544	0.000131131	0.000130736	0.00012964	0.000129126
	0.87	0.00013642	0.000139161	0.000140391	0.000139245	0.000138246	0.000137818	0.00013937	0.000138361	0.000136366	0.000137046	0.000137987	0.000137985	0.00013666	0.000136739	0.000136839	0.000135954	0.000136959	0.000137078	0.00013644	0.000135795	0.0001361	0.000134472	0.000134128	0.000133982	0.000132961	0.000134123	0.000133465	0.000133736	0.000134626	0.000134798	0.000134107	0.000133577	0.000133318	0.000133244	0.000133306	0.000133539	0.000131993	0.00013351	0.000130867	0.000133638	0.000132338	0.000132352	0.000129391	0.000133138	0.000130517	0.000130382	0.000129184	0.000128815
	0.865	0.000135503	0.00013865	0.000139654	0.00013847	0.000137918	0.000137294	0.000138505	0.00013764	0.000136058	0.000136399	0.000137154	0.000137591	0.000135723	0.000136179	0.000136427	0.000135126	0.000136754	0.000136554	0.00013494	0.000135194	0.000135436	0.000133797	0.000133672	0.000133084	0.000132391	0.000133676	0.000132783	0.000133244	0.000134201	0.000134283	0.000133926	0.00013356	0.000133062	0.000132352	0.000133011	0.000132883	0.000131411	0.000132969	0.000129876	0.00013306	0.000132643	0.000131551	0.000128893	0.000132425	0.000130136	0.000129853	0.000128333	0.00012847
	0.86	0.00013485	0.000138025	0.000139345	0.000138151	0.000137574	0.000136388	0.000138127	0.000137113	0.000135622	0.000135772	0.000136584	0.000136755	0.000135317	0.00013565	0.000135713	0.000134951	0.000136139	0.000136062	0.000134471	0.00013454	0.000134738	0.000133595	0.000132656	0.000132517	0.000131888	0.000133273	0.000132155	0.000132875	0.00013359	0.00013382	0.000133224	0.00013293	0.000132646	0.000131762	0.000132417	0.000132418	0.000130924	0.000131896	0.000129265	0.000132152	0.000131819	0.000130979	0.00012891	0.000132077	0.000129422	0.000129248	0.000128156	0.000127937
	0.855	0.00013384	0.000137715	0.000138889	0.000137993	0.000136883	0.000135267	0.000137911	0.000136683	0.000134971	0.000134885	0.0001357	0.000136032	0.00013471	0.000135145	0.000134783	0.000134093	0.000135687	0.000135381	0.000134278	0.000134048	0.000133921	0.000132597	0.000133036	0.000131943	0.000131095	0.000132793	0.00013134	0.000132245	0.000133048	0.000133243	0.000132427	0.000132505	0.000132124	0.000131169	0.000131764	0.000132175	0.00013038	0.00013143	0.000128815	0.000132111	0.000130887	0.000130038	0.00012846	0.000131483	0.0001287	0.000128266	0.000127524	0.000126984
	0.85	0.000133695	0.000137241	0.000138115	0.000137276	0.000136964	0.000134909	0.000137199	0.000136222	0.000134507	0.00013493	0.000135373	0.000135378	0.000133381	0.000134918	0.000135336	0.000133502	0.000135204	0.000134456	0.000133623	0.000133433	0.000133362	0.000131654	0.000132285	0.000131359	0.000130631	0.000132115	0.000130842	0.000131378	0.000132677	0.000132506	0.00013132	0.000131826	0.000131295	0.000130507	0.000131186	0.000131424	0.000129963	0.000130503	0.000128037	0.000131434	0.000130805	0.00012924	0.000127102	0.00013086	0.000128348	0.000127573	0.000126758	0.000126318
	0.845	0.000132839	0.000136836	0.000137547	0.000137048	0.000136293	0.000134532	0.000136637	0.000135539	0.000133772	0.000134021	0.000134743	0.00013485	0.000132223	0.00013498	0.000134409	0.000133132	0.000134688	0.000134209	0.000132826	0.000132526	0.000132592	0.000130973	0.000131585	0.000130848	0.000129405	0.000131381	0.0001307	0.000131186	0.000132181	0.0001321	0.000131278	0.0001314	0.000131144	0.000129838	0.000130783	0.00013023	0.000129574	0.000130345	0.000126934	0.000130878	0.000129817	0.000128695	0.000126626	0.000130275	0.000127681	0.000126844	0.000126068	0.000125573
	0.84	0.000132085	0.000136184	0.000137072	0.000136246	0.00013541	0.000134535	0.000136066	0.000135083	0.000133565	0.000133181	0.000134398	0.000133914	0.000132459	0.000134113	0.000133701	0.000132528	0.000133562	0.000133564	0.000132313	0.000132174	0.000132295	0.000130702	0.000131409	0.000130455	0.000128381	0.000130929	0.000129896	0.000130701	0.000131326	0.000131555	0.000130284	0.00013088	0.000130562	0.00012987	0.000130163	0.000129763	0.000129101	0.000129051	0.000126467	0.000130315	0.000129627	0.000128175	0.000125828	0.000129991	0.000127061	0.00012605	0.000125964	0.000125381
	0.835	0.000131705	0.000135859	0.000136553	0.000135734	0.000134156	0.000133252	0.000135292	0.000134536	0.000133418	0.000132702	0.000133758	0.000133457	0.000132101	0.000133457	0.000132995	0.000131548	0.000132783	0.000132737	0.000131545	0.000131822	0.000131895	0.000129967	0.000130679	0.00012985	0.000128031	0.000130543	0.000129494	0.000130185	0.000130951	0.000130942	0.000130001	0.000130032	0.000130191	0.00012916	0.000129199	0.000129948	0.000128316	0.000128248	0.000125616	0.000129427	0.00012886	0.000127748	0.000125085	0.000129232	0.000126533	0.000125348	0.000125019	0.000124371
	0.83	0.000131318	0.000135296	0.00013603	0.000135139	0.000133857	0.000132476	0.000134986	0.000134189	0.000132125	0.000132352	0.000132928	0.000133119	0.000131636	0.000132622	0.000132423	0.000131081	0.000132351	0.000132018	0.000131239	0.000131255	0.000131525	0.000129593	0.000129808	0.000129286	0.000127028	0.000130118	0.000128885	0.000129311	0.000130242	0.000130203	0.000130299	0.000129357	0.000129298	0.000128529	0.000128508	0.000129361	0.000127799	0.000127803	0.00012535	0.0001285	0.000127568	0.000126902	0.000124598	0.000128566	0.000126021	0.000124717	0.000124319	0.000123524
	0.825	0.000130745	0.000134949	0.00013564	0.000134717	0.000133246	0.000132045	0.000134312	0.000133484	0.000131415	0.000131678	0.00013244	0.000132587	0.000130508	0.000131771	0.000131504	0.000130211	0.000131915	0.000131633	0.000130448	0.000130526	0.000131108	0.000129402	0.000129378	0.000128726	0.000126974	0.000129487	0.000128287	0.000128596	0.000129617	0.000129489	0.000129407	0.000128844	0.000128858	0.00012803	0.000128086	0.000128632	0.000127167	0.000127139	0.000124409	0.000128249	0.00012754	0.000126416	0.000124596	0.000128005	0.000125256	0.000123967	0.000123778	0.000122833
	0.82	0.000130285	0.000134354	0.000135053	0.000133808	0.000132915	0.000131441	0.000133907	0.000132888	0.000130608	0.000131057	0.000131868	0.000131891	0.000130298	0.000131034	0.000131032	0.000129867	0.000130961	0.000131158	0.000130025	0.000129889	0.00012997	0.000129032	0.000128113	0.000128172	0.000126904	0.000128774	0.000127777	0.000127975	0.000129017	0.000128819	0.000128742	0.000128578	0.000128216	0.000127361	0.000127554	0.000127734	0.000126446	0.000127239	0.000123661	0.000127603	0.000126269	0.000125715	0.000123737	0.000127396	0.000124561	0.000123101	0.00012343	0.000122187
	0.815	0.00012916	0.000133904	0.000134286	0.000133279	0.000131981	0.000130734	0.000133203	0.000132461	0.000129758	0.000130534	0.000131387	0.000131065	0.000129538	0.000130445	0.000130448	0.000129057	0.000130493	0.000130649	0.000129257	0.000129218	0.000129296	0.000128131	0.00012736	0.00012765	0.000126503	0.000128259	0.000127124	0.000127123	0.00012818	0.000128077	0.000128394	0.00012791	0.000127523	0.000126709	0.000126669	0.000126917	0.000125658	0.0001263	0.000123558	0.000126857	0.000125411	0.000125397	0.000123118	0.000126364	0.000124364	0.000122711	0.000122658	0.000122078
	0.81	0.0001288	0.000133116	0.0001338	0.000132794	0.000131196	0.000130068	0.000132326	0.000131626	0.000129459	0.000129955	0.000130867	0.000130491	0.00012911	0.000130094	0.0001297	0.00012805	0.00013025	0.000129974	0.000128616	0.00012882	0.000128683	0.000127803	0.000126836	0.000126843	0.000126016	0.00012744	0.000126413	0.000126507	0.000127774	0.000127809	0.000127832	0.000126605	0.000127001	0.000125992	0.00012621	0.000126539	0.000125181	0.000125714	0.000122617	0.000126467	0.000124881	0.000124671	0.000122501	0.000125944	0.000123631	0.000121931	0.000122027	0.000121548
	0.805	0.000127934	0.000132732	0.000133031	0.000131952	0.000130647	0.000129437	0.000132168	0.000131151	0.000129154	0.000129377	0.000130498	0.000129952	0.000128303	0.000129679	0.000128931	0.000127626	0.000129539	0.000129353	0.000127794	0.00012816	0.000128051	0.000126676	0.000126212	0.000126034	0.000125226	0.000126867	0.000125527	0.000125907	0.000127236	0.000127389	0.000126981	0.00012611	0.000126156	0.000125235	0.000125626	0.000125635	0.000124495	0.000125228	0.000122026	0.000126138	0.000125724	0.000124018	0.000122049	0.000125191	0.000123063	0.000121172	0.00012146	0.00012103
	0.8	0.000127503	0.000131877	0.000132361	0.000131472	0.000129866	0.000128527	0.000131473	0.000130602	0.000128657	0.000129073	0.000129983	0.000129624	0.000127659	0.000129266	0.000128092	0.000127105	0.000128864	0.000128888	0.000127248	0.000127314	0.000127395	0.000126053	0.000125217	0.000125715	0.00012436	0.000126023	0.00012521	0.000125676	0.000126147	0.000126574	0.000126471	0.000125598	0.00012567	0.00012501	0.00012426	0.000124971	0.000123362	0.000125238	0.000121687	0.000125332	0.000125125	0.000123554	0.000121163	0.000124919	0.000122493	0.000120553	0.000121217	0.0001203
	0.795	0.000126622	0.000131501	0.000131739	0.000130733	0.000129255	0.000128007	0.00013091	0.000129709	0.0001283	0.000128608	0.000129275	0.00012907	0.000126511	0.000128321	0.00012782	0.00012621	0.000127954	0.000127967	0.000126645	0.000127003	0.000127066	0.000125441	0.000124614	0.000125215	0.000124037	0.000125477	0.000124544	0.000124634	0.000125745	0.000125951	0.000125849	0.000124661	0.000124701	0.000124172	0.000123807	0.000124654	0.000122441	0.000124024	0.000121065	0.000124521	0.000124618	0.000122434	0.000120505	0.000124447	0.000121607	0.000120105	0.000120659	0.000119608
	0.79	0.000126065	0.000130881	0.000130916	0.000130242	0.000128802	0.000127729	0.000130552	0.000129283	0.000127633	0.000127931	0.000128544	0.000128671	0.000126691	0.00012777	0.000127456	0.000126052	0.000128034	0.000127217	0.000126173	0.00012658	0.000126341	0.000124647	0.000123798	0.000124503	0.00012347	0.000125228	0.000123664	0.000124113	0.000125051	0.000125331	0.000125285	0.000123877	0.000124026	0.000123482	0.000123427	0.000123969	0.000121693	0.000123418	0.000120117	0.000124491	0.000123711	0.000121184	0.000119677	0.000123635	0.000121357	0.000119467	0.000120082	0.000119415
	0.785	0.000125463	0.000129878	0.000130568	0.000129813	0.000128249	0.000127266	0.000129943	0.000128704	0.000126676	0.000126946	0.00012751	0.000127956	0.000125559	0.000126977	0.000126553	0.000125317	0.000127529	0.00012672	0.000125325	0.000125953	0.000125683	0.000124089	0.000123575	0.000123979	0.000122745	0.0001244	0.000122845	0.000123372	0.000124557	0.000124428	0.000125072	0.00012355	0.000123287	0.000122571	0.000122573	0.00012338	0.000121689	0.00012258	0.000119594	0.000123542	0.000122656	0.000120732	0.000119266	0.000123023	0.000120883	0.000119248	0.000119465	0.000118433
	0.78	0.000125015	0.000129084	0.000129853	0.00012932	0.000127969	0.000126763	0.000129372	0.000127994	0.000126129	0.000126465	0.000126952	0.000126692	0.000125111	0.000126154	0.000125552	0.000124499	0.000126819	0.000126047	0.000124435	0.000125377	0.000125174	0.000123573	0.000122947	0.000123149	0.000121669	0.000124078	0.000122253	0.000122617	0.000124192	0.000123958	0.000124311	0.00012261	0.000122952	0.000122143	0.00012211	0.000122289	0.000121023	0.000121729	0.000118989	0.000122272	0.000121438	0.000119933	0.000118008	0.000122265	0.000119903	0.000118739	0.000118535	0.000117906
	0.775	0.000124235	0.000128585	0.000129216	0.000128625	0.000127399	0.000126195	0.000128385	0.000127396	0.000125014	0.000125683	0.000126038	0.00012676	0.000124135	0.000125968	0.000124997	0.000123682	0.000126318	0.000125839	0.000123891	0.000124594	0.000124325	0.000123123	0.000122092	0.000122333	0.000120972	0.000123207	0.000121798	0.000122189	0.000123341	0.000123163	0.000123618	0.000121866	0.000122192	0.000121545	0.000121354	0.000121314	0.000120225	0.00012114	0.00011796	0.000121732	0.000120855	0.000120238	0.000117376	0.000121427	0.000119272	0.000117624	0.000117729	0.000116711
	0.77	0.000123413	0.000127956	0.000128926	0.000128284	0.000126399	0.000125327	0.000128213	0.000126828	0.00012447	0.000125114	0.000125521	0.000125868	0.000123658	0.000125121	0.000124369	0.000122782	0.000125081	0.000125313	0.00012312	0.000124121	0.000123744	0.00012225	0.000121519	0.000121899	0.000120829	0.000122336	0.00012076	0.000121788	0.000122701	0.000122631	0.000122862	0.000121236	0.000121529	0.000120716	0.000120489	0.000120835	0.000119609	0.000120438	0.000117248	0.000121046	0.000120236	0.000119637	0.000117062	0.000120675	0.000118593	0.000117345	0.000117729	0.00011668
	0.765	0.000122904	0.000127144	0.000128439	0.000127626	0.000125861	0.000124539	0.000127473	0.00012622	0.000123967	0.000124338	0.000124904	0.000125153	0.000122869	0.000124504	0.000123686	0.000122454	0.000124611	0.000124457	0.000122586	0.000123338	0.000122972	0.000121352	0.000120947	0.000121205	0.000120079	0.000121959	0.000120428	0.000120998	0.000121748	0.000121826	0.000122389	0.000120477	0.000120901	0.00012015	0.000119911	0.00012023	0.000119197	0.000119243	0.000116576	0.000120531	0.000118804	0.000118953	0.000116276	0.000120112	0.000118386	0.000115976	0.000117303	0.00011605
	0.76	0.000122276	0.000126569	0.000127289	0.000126623	0.000125062	0.00012387	0.000126688	0.0001254	0.000122883	0.000123439	0.000124285	0.000124716	0.000121592	0.000123502	0.00012324	0.000121963	0.000123957	0.000123761	0.000122153	0.000122787	0.000122279	0.000120869	0.00012017	0.000120575	0.000119055	0.000120851	0.00011984	0.000120175	0.000121132	0.000121165	0.000121396	0.000120343	0.00012031	0.00011969	0.000119728	0.00011927	0.000118672	0.00011841	0.000115735	0.00011982	0.000117572	0.00011818	0.000115491	0.000119438	0.000117439	0.000115665	0.000116289	0.000115351
	0.755	0.000121613	0.00012553	0.000126735	0.000125803	0.000123978	0.000123281	0.000125756	0.000125058	0.000121579	0.000122977	0.000123825	0.00012377	0.000120808	0.000122812	0.000122623	0.000121217	0.000123597	0.000123021	0.000121368	0.000122145	0.000121613	0.000120165	0.000119584	0.000119941	0.000117948	0.000120542	0.00011901	0.000119722	0.000120128	0.000120626	0.000120599	0.000119973	0.000119605	0.000119052	0.000118963	0.000118828	0.000117794	0.000117912	0.000115152	0.000119257	0.000117186	0.000117524	0.000114733	0.000118719	0.000116544	0.000115207	0.000115587	0.000114973
	0.75	0.00012081	0.000125461	0.000126049	0.000125141	0.00012337	0.000122749	0.000125248	0.000124586	0.000120911	0.000122255	0.000123378	0.000123426	0.000121113	0.000122306	0.000121644	0.000120682	0.000122952	0.000122747	0.000120927	0.000121412	0.000121048	0.000119325	0.000119173	0.000119289	0.000117763	0.000119816	0.000118391	0.000119148	0.000119575	0.000120136	0.000119974	0.000118579	0.000118719	0.000118108	0.000118298	0.000118091	0.000116978	0.000117622	0.000114049	0.00011839	0.0001162	0.000116818	0.000113848	0.000117965	0.000115998	0.000113673	0.000115176	0.000113853
	0.745	0.000120078	0.000124815	0.000125233	0.000124311	0.000122888	0.000122207	0.000124436	0.000123849	0.000120425	0.000121741	0.000122394	0.00012302	0.000120418	0.000121596	0.000121482	0.00012013	0.000122166	0.000122203	0.000120056	0.000120771	0.00012026	0.000119083	0.000118491	0.000118872	0.000117594	0.000119053	0.000118253	0.000118502	0.000118994	0.000119215	0.000119073	0.000117911	0.0001182	0.000116583	0.000117682	0.000117022	0.000116055	0.000116498	0.000113511	0.000117858	0.000115552	0.00011595	0.00011332	0.000117366	0.000115473	0.000112994	0.000114404	0.000113506
	0.74	0.000119567	0.00012417	0.000124762	0.000123752	0.000122432	0.000121667	0.00012375	0.000123054	0.000119787	0.000121089	0.000121749	0.00012251	0.00011914	0.000120816	0.00012111	0.00011933	0.000121664	0.00012179	0.000119843	0.000120094	0.000119454	0.000118201	0.000117648	0.000117883	0.000116652	0.000118257	0.000117762	0.000118018	0.000118523	0.000118352	0.000118418	0.000117237	0.000117657	0.000116442	0.000116521	0.00011633	0.000115416	0.000116193	0.00011313	0.000116899	0.000115074	0.000115295	0.000112883	0.00011687	0.00011464	0.000112255	0.000113967	0.000112733
	0.735	0.00011882	0.000123496	0.000124218	0.000122863	0.000121525	0.000120944	0.000123415	0.000122352	0.00011907	0.000120474	0.000121027	0.000121904	0.000118681	0.000120188	0.00012022	0.000118602	0.00012064	0.000121233	0.000118629	0.000119306	0.000118373	0.000117114	0.000116526	0.000117183	0.000115875	0.000117782	0.000117034	0.000117466	0.000117807	0.000117826	0.000117943	0.000116527	0.000116717	0.000115861	0.000115854	0.000115936	0.000114496	0.000115695	0.00011266	0.000116291	0.000114311	0.000115064	0.000111998	0.000116061	0.000114148	0.000111806	0.000113577	0.000112001
	0.73	0.000118282	0.000122819	0.00012372	0.00012223	0.000120956	0.000120415	0.000122535	0.000121745	0.000118375	0.000119752	0.000120118	0.00012111	0.000118249	0.000119596	0.00011943	0.000117906	0.000119996	0.000120274	0.000118151	0.000118681	0.000117883	0.000116664	0.000116255	0.000116339	0.000115734	0.00011674	0.000116088	0.000116516	0.000116802	0.000117084	0.00011766	0.000115991	0.000116055	0.000115101	0.000114802	0.000114902	0.000113813	0.000115277	0.00011191	0.000115674	0.000113963	0.000114559	0.000111559	0.000115408	0.000113493	0.000111001	0.000112755	0.000111252
	0.725	0.000117671	0.000122131	0.000122987	0.000122083	0.000120335	0.000119824	0.000122126	0.000121086	0.000118473	0.000119013	0.000119521	0.000120336	0.00011741	0.000118789	0.000118726	0.000117419	0.000119192	0.000119769	0.000117523	0.000118115	0.000117067	0.000115911	0.00011549	0.000115716	0.000115046	0.000116094	0.000115569	0.000115815	0.00011629	0.000116305	0.000116654	0.000115399	0.000115496	0.000114516	0.000114297	0.000114726	0.000113091	0.00011461	0.000111132	0.00011502	0.000112889	0.000113919	0.000110928	0.000114808	0.000112611	0.000110017	0.000111988	0.000110601
	0.72	0.000117041	0.000121484	0.000122295	0.000121331	0.000119659	0.000119075	0.000121513	0.000120363	0.00011817	0.00011848	0.000118845	0.000119411	0.000116587	0.000118199	0.00011804	0.000116844	0.000118706	0.00011916	0.000116454	0.000117404	0.000116512	0.000115359	0.000114602	0.000115255	0.000114273	0.000115817	0.000114871	0.00011509	0.000115113	0.000115526	0.000116096	0.000114497	0.000114787	0.000113898	0.000114249	0.000113923	0.00011223	0.000113732	0.00011096	0.00011421	0.000111997	0.000113341	0.000110056	0.000114103	0.000112038	0.000109604	0.00011112	0.000109759
	0.715	0.00011643	0.000120748	0.000121608	0.000120605	0.000118953	0.000118461	0.000120458	0.0001195	0.000116942	0.000117765	0.00011819	0.00011879	0.000115635	0.000117591	0.000117085	0.000115974	0.00011807	0.000118454	0.000115872	0.000116685	0.000115919	0.000114359	0.000113994	0.000114437	0.000113123	0.000114731	0.00011431	0.000114455	0.000114475	0.00011508	0.000115249	0.000113813	0.00011401	0.00011306	0.000113177	0.000113014	0.000111791	0.000112885	0.000109116	0.000113607	0.000111429	0.000112358	0.000109277	0.000113336	0.000111517	0.000109127	0.000110452	0.000109142
	0.71	0.000115502	0.000119942	0.000120951	0.000119822	0.000118508	0.000117628	0.000119844	0.000118555	0.000116556	0.000116917	0.000117523	0.000118234	0.000115524	0.00011729	0.000116411	0.000115599	0.000117333	0.000117506	0.000115316	0.000116032	0.000115329	0.000113884	0.000113449	0.00011365	0.000112602	0.000114017	0.000113768	0.000113795	0.000113979	0.000114325	0.000114776	0.000112927	0.000113422	0.000112633	0.000112708	0.000112446	0.000110703	0.000112493	0.000108496	0.000113003	0.00011104	0.000111636	0.000108388	0.000112604	0.00011035	0.00010857	0.000109433	0.000108374
	0.705	0.000115	0.000119335	0.000120303	0.000119534	0.000117917	0.0001171	0.000119562	0.000117985	0.000115937	0.000116311	0.000116877	0.000117412	0.000114918	0.000116577	0.000115881	0.000114829	0.000116602	0.000116728	0.000114605	0.000115683	0.000114487	0.000113398	0.000112998	0.000113003	0.000111882	0.00011327	0.000112943	0.00011314	0.000113363	0.000113593	0.000114345	0.000112664	0.000112628	0.000111947	0.000111889	0.00011171	0.000110463	0.000112003	0.000107283	0.000112245	0.000110361	0.000110881	0.000107852	0.000111918	0.000110206	0.000107333	0.000108868	0.000107665
	0.7	0.000114299	0.000118642	0.000119464	0.000118628	0.000117157	0.00011654	0.000118962	0.000117367	0.000115184	0.000115416	0.000116378	0.000116591	0.000114198	0.000115676	0.000115369	0.000114079	0.00011603	0.000116194	0.000113868	0.000114846	0.000113858	0.000112575	0.00011219	0.000112342	0.000111108	0.000112549	0.000112132	0.00011259	0.000112728	0.000112938	0.000113117	0.000111945	0.000112106	0.000111193	0.00011128	0.000111207	0.000109585	0.000111338	0.00010698	0.000111799	0.000109526	0.000110559	0.000107304	0.000111237	0.000109653	0.000106787	0.000108242	0.000107057
	0.695	0.000113483	0.000117862	0.000118533	0.000117372	0.000116533	0.000115832	0.000118188	0.000116599	0.000113754	0.00011471	0.000115632	0.000115852	0.000113728	0.000114966	0.00011518	0.00011329	0.000115471	0.000115331	0.000113054	0.00011434	0.000113364	0.000111878	0.000111399	0.000111575	0.000110766	0.000111816	0.000111395	0.00011182	0.000112096	0.000112172	0.000112712	0.000110988	0.000111411	0.000110565	0.000110801	0.00011034	0.000109588	0.00011096	0.000106145	0.000111295	0.000108778	0.000109859	0.000106489	0.000110414	0.000108853	0.000106282	0.000107629	0.000106402
	0.69	0.000112728	0.000117311	0.000118045	0.000116905	0.000115518	0.000115187	0.000117192	0.000115843	0.000113143	0.000114234	0.000114942	0.000115501	0.000112855	0.000114337	0.000114446	0.000112631	0.000114468	0.000114608	0.000112494	0.000113524	0.000112744	0.000111112	0.00011059	0.000110839	0.000109844	0.000111198	0.000110486	0.000111059	0.000111378	0.000111351	0.000111922	0.00011039	0.000110665	0.000109537	0.000110277	0.000109611	0.000108429	0.000110162	0.000105436	0.000110143	0.000108404	0.000109216	0.000106029	0.000109617	0.000107846	0.000105102	0.000106941	0.000105882
	0.685	0.000112013	0.000116719	0.000117549	0.00011589	0.000114768	0.000114329	0.000116818	0.000115129	0.000112519	0.000113582	0.00011453	0.000114835	0.000112271	0.000113714	0.000113674	0.000111944	0.000113553	0.000113808	0.000111805	0.000112805	0.000112099	0.000110527	0.000110045	0.000110274	0.00010922	0.000110388	0.0001098	0.000110372	0.000110432	0.000110519	0.000111213	0.000109695	0.000109992	0.000108867	0.000109503	0.000108637	0.000107702	0.000109473	0.000105043	0.00010966	0.000107549	0.000108713	0.000105139	0.000108829	0.000107467	0.000104282	0.000106163	0.000105296
	0.68	0.000111157	0.000116126	0.000116413	0.000115171	0.000114207	0.000113806	0.000116194	0.000114407	0.000111942	0.000112858	0.000113381	0.000114201	0.000111462	0.000112752	0.000112445	0.000111393	0.000113001	0.000113422	0.000111241	0.000111986	0.000111273	0.000109726	0.000109243	0.000109906	0.000108624	0.00010996	0.000108971	0.000109632	0.000109969	0.00011018	0.000110364	0.000108811	0.000109893	0.000108171	0.000108613	0.000107896	0.000107266	0.000108486	0.000104784	0.000109036	0.000106751	0.000108089	0.000104404	0.000108418	0.000106955	0.000103508	0.000105671	0.000104846
	0.675	0.00011074	0.000115566	0.000115685	0.000114546	0.000113678	0.000113082	0.000115251	0.000113762	0.000111577	0.000112211	0.000112661	0.000113295	0.0001108	0.000112219	0.000111767	0.000110828	0.000112122	0.000112752	0.000110652	0.000111363	0.000110556	0.000109087	0.000108546	0.000109263	0.000108143	0.000109228	0.000108503	0.000108737	0.000109016	0.0001097	0.000109751	0.000108372	0.000109208	0.000107608	0.000107895	0.000107656	0.000106357	0.000107829	0.000103855	0.000108162	0.000105945	0.000107218	0.00010366	0.000107951	0.000106074	0.000103409	0.000104837	0.000104341
	0.67	0.000109865	0.000114568	0.000114832	0.000113622	0.000112828	0.000112271	0.000114418	0.000112995	0.00011111	0.000111475	0.000111909	0.000112643	0.000110153	0.000111384	0.000111162	0.000110068	0.000111267	0.000111809	0.000109914	0.000110606	0.000109772	0.00010829	0.000107982	0.000108534	0.00010741	0.000108315	0.000107717	0.000108263	0.000108389	0.000108903	0.000108934	0.000107722	0.000108351	0.00010703	0.000107369	0.000107135	0.000105773	0.000107125	0.000103106	0.0001076	0.000105394	0.000106619	0.000102907	0.000107058	0.000105521	0.000102478	0.000104111	0.000103535
	0.665	0.000109119	0.000113897	0.000113938	0.000113117	0.000112091	0.000111784	0.00011359	0.000112308	0.00011058	0.000110852	0.000111337	0.000112045	0.000109877	0.000110783	0.000110198	0.000109122	0.000110522	0.000111033	0.000108989	0.000109706	0.000109258	0.000107675	0.000107417	0.000107715	0.000106339	0.000107801	0.000106927	0.000107567	0.000107692	0.000108101	0.000108509	0.000106975	0.000107518	0.000106444	0.000106568	0.000106291	0.000105001	0.000106147	0.000102649	0.000106817	0.000104616	0.000105833	0.000102259	0.000106433	0.000104688	0.000101692	0.000103175	0.000102715
	0.66	0.000108234	0.000113002	0.000113246	0.00011245	0.000111209	0.000110932	0.000112678	0.000111744	0.000109462	0.000110076	0.000110698	0.000111525	0.000109005	0.000109947	0.000109009	0.000108283	0.000109911	0.000110208	0.000108515	0.00010907	0.000108435	0.000106798	0.000106608	0.000107067	0.000105506	0.000107	0.000106406	0.000106725	0.000106976	0.000107438	0.000107715	0.000106362	0.000106529	0.000105778	0.000105804	0.000105278	0.000104209	0.000105811	0.000101453	0.000106113	0.00010389	0.000105156	0.000101517	0.000105883	0.000103995	0.000100739	0.000102879	0.000101729
	0.655	0.000107659	0.000112246	0.000112494	0.000111574	0.000110504	0.000110331	0.000112054	0.000110969	0.000108557	0.000109448	0.000110112	0.000110735	0.000108215	0.000109242	0.000108409	0.000107606	0.000109244	0.000109478	0.000107823	0.000108489	0.000107926	0.000106329	0.000105914	0.000106381	0.000104562	0.000106313	0.000105671	0.000106332	0.000106411	0.000106759	0.00010699	0.000105333	0.000105754	0.000105135	0.000104917	0.000104507	0.000103561	0.00010501	0.000100756	0.000105168	0.000103298	0.000104547	0.000100879	0.000105386	0.000103147	9.99529e-05	0.000102288	0.000101448
	0.65	0.000106851	0.000111472	0.000111647	0.000110881	0.00010968	0.000109403	0.000111501	0.000110226	0.000107923	0.000108605	0.000109208	0.000109852	0.000107628	0.000108731	0.000107904	0.000106835	0.000108507	0.000108699	0.000106976	0.000107773	0.000106972	0.000105504	0.000105185	0.000105368	0.000104167	0.000105584	0.000104943	0.000105689	0.00010574	0.000105828	0.000106271	0.000104588	0.000104898	0.000104373	0.000104064	0.000103848	0.000103047	0.00010412	9.9803e-05	0.000104653	0.000102589	0.000103808	0.000100054	0.000104612	0.000102619	9.93955e-05	0.00010158	0.000100627
	0.645	0.000106065	0.000110689	0.000111027	0.000110235	0.000109271	0.000108616	0.000110595	0.000109501	0.000106941	0.000107616	0.000108493	0.000109009	0.000107052	0.00010795	0.000106958	0.000106107	0.000107495	0.000107661	0.000106175	0.000106903	0.0001062	0.000104763	0.000104426	0.000104711	0.000103147	0.000104859	0.000104232	0.000104869	0.000105295	0.00010517	0.000105344	0.00010361	0.000104147	0.000103384	0.000103723	0.00010321	0.000102214	0.00010338	9.97448e-05	0.000103984	0.000102052	0.00010343	9.93246e-05	0.000103964	0.00010186	9.8233e-05	0.000100882	9.97854e-05
	0.64	0.000105614	0.000109996	0.000110199	0.000109419	0.0001084	0.000107917	0.000109837	0.000108862	0.000106295	0.000106798	0.000107746	0.000108293	0.000106254	0.000107231	0.000106048	0.000105159	0.000107015	0.00010692	0.000105467	0.000106152	0.000105567	0.000104007	0.000103839	0.000103917	0.000102122	0.000104088	0.000103372	0.000104141	0.000104351	0.000104739	0.000104474	0.000103138	0.000103757	0.000102503	0.000102867	0.00010252	0.000101513	0.000102831	9.92082e-05	0.000103354	0.000101455	0.000102455	9.86345e-05	0.000103181	0.000101291	9.78809e-05	0.000100144	9.92512e-05
	0.635	0.000104455	0.000109113	0.000109465	0.000108933	0.000107553	0.00010714	0.000109111	0.000108054	0.000105376	0.000106141	0.000106926	0.000107539	0.00010533	0.00010634	0.00010542	0.000104676	0.000106112	0.000106215	0.000104541	0.00010533	0.00010487	0.000103282	0.000103241	0.000103232	0.000101538	0.000103603	0.000102559	0.000103478	0.000103615	0.000104009	0.000104053	0.000102471	0.000102838	0.000101909	0.000102106	0.000101846	0.000100966	0.000102147	9.83406e-05	0.000102297	0.000100753	0.000101468	9.78645e-05	0.00010229	0.000100584	9.72381e-05	9.90234e-05	9.83079e-05
	0.63	0.00010366	0.000108177	0.000108596	0.000108203	0.000106621	0.00010633	0.000108281	0.000107414	0.000104619	0.000105361	0.000106274	0.000106715	0.000104871	0.000105655	0.000104946	0.000103705	0.00010532	0.000105645	0.000103754	0.000104707	0.000103856	0.000102575	0.000102389	0.000102525	0.000100894	0.000102516	0.000101888	0.000102574	0.000102477	0.0001033	0.000103182	0.000101769	0.000102324	0.000101131	0.000101463	0.00010118	0.000100463	0.000101544	9.76162e-05	0.000101354	9.9964e-05	0.000100781	9.70907e-05	0.000101465	0.000100021	9.60312e-05	9.86518e-05	9.76174e-05
	0.625	0.00010307	0.000107564	0.000108087	0.000107583	0.000106141	0.000105611	0.00010765	0.000106589	0.000103959	0.000105005	0.000105565	0.000106148	0.000103857	0.000104995	0.000104294	0.000102819	0.000104691	0.000104922	0.000103129	0.000104038	0.000103236	0.000101671	0.000101689	0.000101865	0.000100142	0.000101746	0.000101072	0.000101924	0.000101745	0.000102274	0.000102535	0.00010118	0.000101494	0.000100575	0.00010076	0.000100609	9.94096e-05	0.000100868	9.68413e-05	0.000100665	9.91833e-05	9.9985e-05	9.65845e-05	0.000100577	9.92207e-05	9.56037e-05	9.82348e-05	9.66861e-05
	0.62	0.000102265	0.000107027	0.000107438	0.000106547	0.00010553	0.000104876	0.000106996	0.000105806	0.000103301	0.000104205	0.000104859	0.000105277	0.000103145	0.000103979	0.000103522	0.000102356	0.000104066	0.000104131	0.000102523	0.000103298	0.000102566	0.000100815	0.000100815	0.000100945	9.93082e-05	0.000100921	0.000100317	0.000101274	0.000101229	0.000101681	0.000101858	0.000100289	0.000100708	9.9681e-05	0.000100001	9.97952e-05	9.87468e-05	0.00010034	9.61895e-05	9.97827e-05	9.84404e-05	9.91063e-05	9.60485e-05	9.99887e-05	9.84657e-05	9.46523e-05	9.73849e-05	9.57255e-05
	0.615	0.000101379	0.000106473	0.000106458	0.00010561	0.000104599	0.000104341	0.000106032	0.000104927	0.000102669	0.000103374	0.000103958	0.000104705	0.000102137	0.000103416	0.000102773	0.000101652	0.000103224	0.000103442	0.00010179	0.000102545	0.000101862	0.000100243	0.000100179	0.000100044	9.84757e-05	0.000100303	9.97405e-05	0.000100426	0.000100618	0.000100576	0.000101112	9.97265e-05	0.000100017	9.91343e-05	9.94187e-05	9.89424e-05	9.80552e-05	9.95916e-05	9.54849e-05	9.93914e-05	9.75959e-05	9.82862e-05	9.53239e-05	9.91682e-05	9.7579e-05	9.37956e-05	9.65314e-05	9.49476e-05
	0.61	0.000101103	0.000105808	0.000105705	0.000104836	0.000104023	0.000103579	0.000105245	0.000104292	0.000102031	0.000102822	0.000103297	0.000103908	0.000101227	0.000102721	0.00010221	0.000100805	0.000102263	0.000102591	0.000100905	0.000101789	0.000101157	9.95346e-05	9.96055e-05	9.946e-05	9.77257e-05	9.96497e-05	9.89578e-05	9.98438e-05	9.9892e-05	9.97095e-05	0.000100191	9.88699e-05	9.9399e-05	9.83509e-05	9.84999e-05	9.82729e-05	9.72669e-05	9.87584e-05	9.48357e-05	9.86687e-05	9.68376e-05	9.76263e-05	9.46217e-05	9.8483e-05	9.69234e-05	9.32317e-05	9.57729e-05	9.44599e-05
	0.605	0.000100223	0.00010485	0.000104969	0.00010418	0.000103346	0.000102873	0.000104548	0.000103427	0.000101399	0.000101996	0.000102584	0.000103095	0.000100684	0.000101886	0.000101499	9.9971e-05	0.000101654	0.000101925	0.000100199	0.000100984	0.000100391	9.86669e-05	9.89894e-05	9.8692e-05	9.68769e-05	9.89668e-05	9.82699e-05	9.89769e-05	9.89198e-05	9.92397e-05	9.95035e-05	9.80622e-05	9.86917e-05	9.75652e-05	9.76459e-05	9.75858e-05	9.63827e-05	9.78883e-05	9.40669e-05	9.80528e-05	9.63605e-05	9.69138e-05	9.39391e-05	9.77734e-05	9.63986e-05	9.26636e-05	9.48985e-05	9.35574e-05
	0.6	9.96549e-05	0.00010413	0.000104046	0.000103449	0.000102754	0.000102156	0.000103844	0.000102634	0.000100498	0.000101304	0.000101885	0.000102394	0.00010003	0.000101163	0.000100511	9.94909e-05	0.000101053	0.000101096	9.94406e-05	0.000100339	9.97279e-05	9.77438e-05	9.80592e-05	9.82869e-05	9.64543e-05	9.84333e-05	9.75984e-05	9.83108e-05	9.81208e-05	9.83669e-05	9.85097e-05	9.72885e-05	9.832e-05	9.69916e-05	9.67509e-05	9.6633e-05	9.58387e-05	9.70041e-05	9.30363e-05	9.72185e-05	9.5684e-05	9.6315e-05	9.31139e-05	9.6729e-05	9.5615e-05	9.19009e-05	9.40618e-05	9.31083e-05
	0.595	9.88059e-05	0.000103129	0.000103392	0.000103093	0.000101783	0.000101535	0.00010319	0.000101804	9.97098e-05	0.000100454	0.000101119	0.000101706	9.93598e-05	0.000100444	9.98475e-05	9.90091e-05	9.9835e-05	0.000100155	9.86597e-05	9.97919e-05	9.90646e-05	9.70642e-05	9.72592e-05	9.77163e-05	9.56457e-05	9.76316e-05	9.70041e-05	9.75658e-05	9.73189e-05	9.77332e-05	9.82175e-05	9.6531e-05	9.74179e-05	9.64337e-05	9.60452e-05	9.58545e-05	9.51931e-05	9.6203e-05	9.25002e-05	9.6358e-05	9.48558e-05	9.56113e-05	9.2795e-05	9.60412e-05	9.4713e-05	9.13494e-05	9.32042e-05	9.23267e-05
	0.59	9.80863e-05	0.000102313	0.000102679	0.000102302	0.00010114	0.000100734	0.000102414	0.000101072	9.90273e-05	9.97322e-05	0.000100401	0.000100905	9.8959e-05	9.97981e-05	9.91779e-05	9.83441e-05	9.95355e-05	9.95183e-05	9.80665e-05	9.89687e-05	9.82242e-05	9.64503e-05	9.65383e-05	9.66814e-05	9.49353e-05	9.68822e-05	9.62431e-05	9.68068e-05	9.64607e-05	9.72509e-05	9.75047e-05	9.59116e-05	9.66174e-05	9.57971e-05	9.54268e-05	9.5065e-05	9.42398e-05	9.57879e-05	9.1758e-05	9.55611e-05	9.4099e-05	9.48524e-05	9.19674e-05	9.56078e-05	9.41323e-05	9.07914e-05	9.26477e-05	9.17234e-05
	0.585	9.73455e-05	0.000101498	0.000101977	0.000101535	0.000100225	9.9891e-05	0.000101663	0.000100422	9.83641e-05	9.89723e-05	9.98142e-05	0.000100184	9.81683e-05	9.89435e-05	9.8372e-05	9.75827e-05	9.88029e-05	9.87054e-05	9.71357e-05	9.80708e-05	9.75836e-05	9.56249e-05	9.58977e-05	9.59967e-05	9.42278e-05	9.61521e-05	9.55011e-05	9.61933e-05	9.58767e-05	9.62729e-05	9.6829e-05	9.5154e-05	9.55816e-05	9.51716e-05	9.45937e-05	9.45169e-05	9.37692e-05	9.51605e-05	9.07775e-05	9.49038e-05	9.34679e-05	9.40402e-05	9.11195e-05	9.45975e-05	9.33521e-05	9.0357e-05	9.2e-05	9.08313e-05
	0.58	9.65605e-05	0.000100738	0.000101295	0.000100732	9.96386e-05	9.91298e-05	0.000100769	9.97799e-05	9.77512e-05	9.83019e-05	9.89885e-05	9.94617e-05	9.7504e-05	9.81841e-05	9.74501e-05	9.66325e-05	9.78727e-05	9.78062e-05	9.64504e-05	9.72091e-05	9.68847e-05	9.4854e-05	9.52402e-05	9.53252e-05	9.34075e-05	9.53524e-05	9.44854e-05	9.56963e-05	9.52488e-05	9.54386e-05	9.59887e-05	9.44429e-05	9.47492e-05	9.45819e-05	9.38863e-05	9.36923e-05	9.30078e-05	9.43592e-05	9.02895e-05	9.41289e-05	9.27252e-05	9.32908e-05	9.05021e-05	9.40577e-05	9.25378e-05	8.95371e-05	9.11963e-05	9.00247e-05
	0.575	9.57399e-05	0.000100099	0.000100678	0.000100039	9.88383e-05	9.83084e-05	0.00010027	9.90744e-05	9.65302e-05	9.75238e-05	9.82322e-05	9.87904e-05	9.65408e-05	9.74159e-05	9.68062e-05	9.57457e-05	9.71372e-05	9.73326e-05	9.57977e-05	9.65401e-05	9.60982e-05	9.42426e-05	9.45247e-05	9.43938e-05	9.27135e-05	9.44682e-05	9.39044e-05	9.47525e-05	9.46546e-05	9.44514e-05	9.52321e-05	9.36147e-05	9.41292e-05	9.36625e-05	9.30318e-05	9.29387e-05	9.2269e-05	9.36093e-05	8.95264e-05	9.34156e-05	9.20267e-05	9.24483e-05	8.96869e-05	9.3269e-05	9.18886e-05	8.86041e-05	9.059e-05	8.91794e-05
	0.57	9.50665e-05	9.95213e-05	9.98877e-05	9.91274e-05	9.81997e-05	9.78087e-05	9.96144e-05	9.82184e-05	9.59068e-05	9.66312e-05	9.73986e-05	9.79204e-05	9.57137e-05	9.67159e-05	9.58922e-05	9.48059e-05	9.63834e-05	9.6298e-05	9.5014e-05	9.58335e-05	9.50902e-05	9.34922e-05	9.37236e-05	9.35737e-05	9.1936e-05	9.39042e-05	9.32114e-05	9.40394e-05	9.38754e-05	9.36169e-05	9.46861e-05	9.28905e-05	9.34631e-05	9.28443e-05	9.24266e-05	9.20871e-05	9.15913e-05	9.27401e-05	8.86566e-05	9.30203e-05	9.13861e-05	9.18215e-05	8.9002e-05	9.25669e-05	9.08781e-05	8.75233e-05	8.98509e-05	8.84947e-05
	0.565	9.42888e-05	9.86841e-05	9.90432e-05	9.83676e-05	9.72405e-05	9.69341e-05	9.87194e-05	9.75321e-05	9.51927e-05	9.62353e-05	9.66261e-05	9.70641e-05	9.52161e-05	9.5972e-05	9.49773e-05	9.38775e-05	9.57266e-05	9.5657e-05	9.44578e-05	9.50515e-05	9.44847e-05	9.29419e-05	9.29638e-05	9.27565e-05	9.12427e-05	9.3212e-05	9.22471e-05	9.31465e-05	9.28606e-05	9.28652e-05	9.39082e-05	9.22842e-05	9.28332e-05	9.1952e-05	9.16162e-05	9.14189e-05	9.08419e-05	9.19358e-05	8.78852e-05	9.22099e-05	9.07698e-05	9.11186e-05	8.82108e-05	9.17027e-05	9.03207e-05	8.66993e-05	8.89778e-05	8.76848e-05
	0.56	9.34954e-05	9.78936e-05	9.80653e-05	9.75891e-05	9.63349e-05	9.6025e-05	9.79163e-05	9.6691e-05	9.43524e-05	9.55037e-05	9.59027e-05	9.63068e-05	9.43647e-05	9.52263e-05	9.40904e-05	9.31422e-05	9.49366e-05	9.51389e-05	9.36402e-05	9.43576e-05	9.36627e-05	9.20984e-05	9.21721e-05	9.19799e-05	9.07459e-05	9.2552e-05	9.14991e-05	9.24416e-05	9.21339e-05	9.22532e-05	9.28189e-05	9.13809e-05	9.22103e-05	9.10841e-05	9.09722e-05	9.06059e-05	9.02021e-05	9.12461e-05	8.69027e-05	9.12558e-05	9.00792e-05	9.02747e-05	8.75221e-05	9.09031e-05	8.95441e-05	8.60814e-05	8.86076e-05	8.66408e-05
	0.555	9.28874e-05	9.71554e-05	9.74695e-05	9.68662e-05	9.5744e-05	9.52464e-05	9.7044e-05	9.60457e-05	9.36372e-05	9.43146e-05	9.50788e-05	9.53526e-05	9.35484e-05	9.439e-05	9.33072e-05	9.2203e-05	9.4195e-05	9.46138e-05	9.28036e-05	9.35108e-05	9.29967e-05	9.13133e-05	9.14379e-05	9.12651e-05	8.9778e-05	9.19341e-05	9.08401e-05	9.1788e-05	9.14778e-05	9.14735e-05	9.22604e-05	9.07202e-05	9.13286e-05	9.03794e-05	9.02154e-05	8.98334e-05	8.91332e-05	9.05336e-05	8.62591e-05	9.0497e-05	8.91627e-05	8.94914e-05	8.6748e-05	9.01404e-05	8.89165e-05	8.55554e-05	8.78758e-05	8.61553e-05
	0.55	9.21933e-05	9.62343e-05	9.65731e-05	9.57322e-05	9.49497e-05	9.43786e-05	9.6225e-05	9.53248e-05	9.28336e-05	9.35438e-05	9.4341e-05	9.45539e-05	9.28671e-05	9.34916e-05	9.26914e-05	9.14116e-05	9.31646e-05	9.3732e-05	9.19898e-05	9.27131e-05	9.22841e-05	9.07607e-05	9.07115e-05	9.05895e-05	8.91638e-05	9.10538e-05	8.99932e-05	9.11124e-05	9.06099e-05	9.07358e-05	9.14587e-05	8.98828e-05	9.05142e-05	8.97703e-05	8.93162e-05	8.90942e-05	8.84154e-05	8.97772e-05	8.58014e-05	8.99423e-05	8.84017e-05	8.87898e-05	8.57981e-05	8.92343e-05	8.82041e-05	8.46293e-05	8.69842e-05	8.5305e-05
	0.545	9.13617e-05	9.53597e-05	9.60193e-05	9.46487e-05	9.4225e-05	9.38034e-05	9.54352e-05	9.44474e-05	9.20381e-05	9.29933e-05	9.36164e-05	9.39391e-05	9.22903e-05	9.27197e-05	9.20676e-05	9.07926e-05	9.25327e-05	9.28319e-05	9.13329e-05	9.19596e-05	9.15102e-05	8.98993e-05	8.99771e-05	8.97006e-05	8.85827e-05	9.02839e-05	8.93794e-05	9.03305e-05	9.00342e-05	9.00213e-05	9.0662e-05	8.92151e-05	8.97553e-05	8.89132e-05	8.84733e-05	8.84282e-05	8.77449e-05	8.91024e-05	8.49291e-05	8.87869e-05	8.77457e-05	8.81187e-05	8.5143e-05	8.86133e-05	8.74534e-05	8.41388e-05	8.61636e-05	8.47609e-05
	0.54	9.05917e-05	9.46032e-05	9.51316e-05	9.40216e-05	9.33667e-05	9.29814e-05	9.46365e-05	9.37113e-05	9.12157e-05	9.22287e-05	9.28162e-05	9.32908e-05	9.13253e-05	9.16014e-05	9.11582e-05	9.01917e-05	9.17719e-05	9.21411e-05	9.04993e-05	9.12391e-05	9.07325e-05	8.90833e-05	8.91566e-05	8.89486e-05	8.77337e-05	8.96238e-05	8.87067e-05	8.95995e-05	8.91948e-05	8.93649e-05	8.9975e-05	8.83412e-05	8.89592e-05	8.80991e-05	8.82184e-05	8.78371e-05	8.69374e-05	8.83245e-05	8.41892e-05	8.80307e-05	8.68719e-05	8.73376e-05	8.44364e-05	8.80096e-05	8.69167e-05	8.3294e-05	8.54585e-05	8.42626e-05
	0.535	8.97428e-05	9.38407e-05	9.43308e-05	9.31867e-05	9.25517e-05	9.23407e-05	9.37403e-05	9.29456e-05	9.04747e-05	9.14018e-05	9.20937e-05	9.23604e-05	9.07887e-05	9.07906e-05	9.03405e-05	8.91711e-05	9.08974e-05	9.12105e-05	8.97283e-05	9.04579e-05	8.99227e-05	8.823e-05	8.82807e-05	8.81193e-05	8.68073e-05	8.88232e-05	8.79606e-05	8.88035e-05	8.84489e-05	8.85744e-05	8.92418e-05	8.76614e-05	8.82505e-05	8.74013e-05	8.73907e-05	8.69399e-05	8.6103e-05	8.75518e-05	8.3333e-05	8.72466e-05	8.60406e-05	8.64856e-05	8.3718e-05	8.71872e-05	8.60063e-05	8.24838e-05	8.47792e-05	8.34838e-05
	0.53	8.88785e-05	9.30709e-05	9.34198e-05	9.24773e-05	9.1823e-05	9.12633e-05	9.28728e-05	9.20849e-05	8.96578e-05	9.05312e-05	9.13485e-05	9.16018e-05	8.99212e-05	9.01568e-05	8.95406e-05	8.84655e-05	9.01118e-05	9.04865e-05	8.89339e-05	8.9582e-05	8.92998e-05	8.7427e-05	8.7477e-05	8.73287e-05	8.60121e-05	8.80501e-05	8.70987e-05	8.80934e-05	8.7506e-05	8.76185e-05	8.86558e-05	8.6917e-05	8.74381e-05	8.65688e-05	8.65766e-05	8.63412e-05	8.54109e-05	8.66553e-05	8.2823e-05	8.64901e-05	8.54526e-05	8.56897e-05	8.30292e-05	8.65403e-05	8.51862e-05	8.17868e-05	8.40761e-05	8.26629e-05
	0.525	8.80761e-05	9.22573e-05	9.26931e-05	9.171e-05	9.10465e-05	9.04793e-05	9.19554e-05	9.12665e-05	8.90139e-05	8.96706e-05	9.06262e-05	9.0889e-05	8.89678e-05	8.95757e-05	8.88652e-05	8.77246e-05	8.93616e-05	8.99027e-05	8.81768e-05	8.87747e-05	8.84689e-05	8.64876e-05	8.66066e-05	8.66014e-05	8.53538e-05	8.71595e-05	8.63539e-05	8.72036e-05	8.67442e-05	8.70602e-05	8.77908e-05	8.59851e-05	8.66801e-05	8.5829e-05	8.56126e-05	8.54973e-05	8.46179e-05	8.60027e-05	8.21194e-05	8.58775e-05	8.4666e-05	8.5051e-05	8.22624e-05	8.5811e-05	8.43114e-05	8.11573e-05	8.34196e-05	8.20763e-05
	0.52	8.74252e-05	9.13572e-05	9.18733e-05	9.10094e-05	9.02788e-05	8.96981e-05	9.11626e-05	9.05246e-05	8.82624e-05	8.882e-05	8.97969e-05	8.99884e-05	8.79919e-05	8.88554e-05	8.81108e-05	8.69129e-05	8.86048e-05	8.8892e-05	8.73945e-05	8.80862e-05	8.77219e-05	8.57862e-05	8.58848e-05	8.60027e-05	8.4536e-05	8.63938e-05	8.55543e-05	8.64921e-05	8.61053e-05	8.60484e-05	8.70812e-05	8.52594e-05	8.58394e-05	8.51232e-05	8.49909e-05	8.47937e-05	8.38098e-05	8.53046e-05	8.14393e-05	8.52762e-05	8.39348e-05	8.44356e-05	8.14559e-05	8.50448e-05	8.36731e-05	8.0539e-05	8.2734e-05	8.15395e-05
	0.515	8.64017e-05	9.05799e-05	9.10241e-05	9.01088e-05	8.95248e-05	8.88644e-05	9.03666e-05	8.97968e-05	8.74688e-05	8.80637e-05	8.89641e-05	8.92206e-05	8.72482e-05	8.81035e-05	8.71783e-05	8.6029e-05	8.79153e-05	8.80714e-05	8.65718e-05	8.73225e-05	8.69531e-05	8.49963e-05	8.51954e-05	8.5149e-05	8.37288e-05	8.58766e-05	8.47244e-05	8.57619e-05	8.53718e-05	8.56078e-05	8.62332e-05	8.44286e-05	8.52189e-05	8.43362e-05	8.41863e-05	8.39228e-05	8.30283e-05	8.43274e-05	8.07305e-05	8.46409e-05	8.33322e-05	8.36204e-05	8.07841e-05	8.42465e-05	8.31114e-05	7.99173e-05	8.20216e-05	8.07204e-05
	0.51	8.55591e-05	8.97914e-05	9.02112e-05	8.94174e-05	8.86421e-05	8.79646e-05	8.95974e-05	8.89708e-05	8.66906e-05	8.73202e-05	8.81809e-05	8.85884e-05	8.65202e-05	8.72573e-05	8.64149e-05	8.52178e-05	8.70278e-05	8.73079e-05	8.57975e-05	8.65303e-05	8.61294e-05	8.42048e-05	8.45302e-05	8.44177e-05	8.31611e-05	8.48878e-05	8.39602e-05	8.49266e-05	8.46633e-05	8.48397e-05	8.56535e-05	8.35083e-05	8.45581e-05	8.3614e-05	8.33939e-05	8.31919e-05	8.22349e-05	8.36795e-05	7.99388e-05	8.38366e-05	8.25607e-05	8.29626e-05	7.97875e-05	8.3449e-05	8.22541e-05	7.92058e-05	8.12599e-05	7.98474e-05
	0.505	8.50378e-05	8.88753e-05	8.93427e-05	8.85481e-05	8.77949e-05	8.73727e-05	8.88516e-05	8.80889e-05	8.59376e-05	8.63753e-05	8.74153e-05	8.78563e-05	8.5608e-05	8.64742e-05	8.56076e-05	8.44346e-05	8.60992e-05	8.66929e-05	8.50492e-05	8.57464e-05	8.53671e-05	8.34752e-05	8.36671e-05	8.37372e-05	8.24747e-05	8.40625e-05	8.31382e-05	8.40843e-05	8.38468e-05	8.4328e-05	8.4822e-05	8.27834e-05	8.38318e-05	8.28863e-05	8.25831e-05	8.25128e-05	8.15641e-05	8.30279e-05	7.91447e-05	8.30451e-05	8.18231e-05	8.21806e-05	7.8897e-05	8.27119e-05	8.15069e-05	7.84585e-05	8.0477e-05	7.91638e-05
	0.5	8.42752e-05	8.80407e-05	8.86102e-05	8.76829e-05	8.69981e-05	8.65337e-05	8.79733e-05	8.72671e-05	8.52122e-05	8.55694e-05	8.66661e-05	8.7013e-05	8.48189e-05	8.57321e-05	8.4972e-05	8.38041e-05	8.5431e-05	8.58688e-05	8.43819e-05	8.49309e-05	8.46195e-05	8.24112e-05	8.28959e-05	8.28838e-05	8.17248e-05	8.33058e-05	8.23075e-05	8.32162e-05	8.3087e-05	8.35433e-05	8.40059e-05	8.19579e-05	8.30291e-05	8.21114e-05	8.18661e-05	8.17882e-05	8.07938e-05	8.21924e-05	7.83751e-05	8.22329e-05	8.10012e-05	8.15667e-05	7.82837e-05	8.19697e-05	8.06173e-05	7.76089e-05	7.97692e-05	7.83568e-05
	0.495	8.34831e-05	8.72316e-05	8.77083e-05	8.69068e-05	8.61405e-05	8.58036e-05	8.71552e-05	8.64016e-05	8.43726e-05	8.48784e-05	8.5758e-05	8.61897e-05	8.42127e-05	8.48889e-05	8.41258e-05	8.29396e-05	8.4711e-05	8.50821e-05	8.35716e-05	8.40186e-05	8.37912e-05	8.18558e-05	8.21818e-05	8.21105e-05	8.0967e-05	8.25539e-05	8.15924e-05	8.25294e-05	8.22285e-05	8.26464e-05	8.311e-05	8.10897e-05	8.22566e-05	8.12619e-05	8.11129e-05	8.10004e-05	8.00793e-05	8.14813e-05	7.76742e-05	8.14268e-05	8.02907e-05	8.07616e-05	7.76141e-05	8.13086e-05	7.99085e-05	7.66918e-05	7.88955e-05	7.75853e-05
	0.49	8.27337e-05	8.64464e-05	8.70476e-05	8.61066e-05	8.54751e-05	8.48742e-05	8.64017e-05	8.55985e-05	8.35494e-05	8.40414e-05	8.50299e-05	8.53451e-05	8.32801e-05	8.40729e-05	8.33391e-05	8.21878e-05	8.37892e-05	8.43221e-05	8.27316e-05	8.33106e-05	8.31341e-05	8.12061e-05	8.14179e-05	8.13521e-05	8.02789e-05	8.18035e-05	8.09078e-05	8.16793e-05	8.1537e-05	8.20526e-05	8.25117e-05	8.02819e-05	8.15229e-05	8.06578e-05	7.99606e-05	8.03094e-05	7.93386e-05	8.07068e-05	7.69031e-05	8.06615e-05	7.94661e-05	7.99976e-05	7.6827e-05	8.05104e-05	7.9102e-05	7.60507e-05	7.80542e-05	7.70476e-05
	0.485	8.18979e-05	8.56902e-05	8.61314e-05	8.53187e-05	8.47055e-05	8.39718e-05	8.55427e-05	8.48424e-05	8.2791e-05	8.31656e-05	8.42141e-05	8.45502e-05	8.24516e-05	8.32383e-05	8.25655e-05	8.14291e-05	8.29416e-05	8.34486e-05	8.20599e-05	8.25287e-05	8.23565e-05	8.03968e-05	8.05963e-05	8.05635e-05	7.94692e-05	8.09819e-05	8.01069e-05	8.09978e-05	8.07638e-05	8.13783e-05	8.17166e-05	7.96338e-05	8.07042e-05	7.99652e-05	7.9206e-05	7.95188e-05	7.87685e-05	7.99634e-05	7.62198e-05	7.99074e-05	7.86048e-05	7.91963e-05	7.60508e-05	7.97874e-05	7.84087e-05	7.53666e-05	7.73825e-05	7.62867e-05
	0.48	8.10427e-05	8.48006e-05	8.51911e-05	8.45246e-05	8.3846e-05	8.31607e-05	8.473e-05	8.40349e-05	8.20364e-05	8.25654e-05	8.34078e-05	8.36676e-05	8.17445e-05	8.24588e-05	8.16136e-05	8.06634e-05	8.2145e-05	8.25127e-05	8.11786e-05	8.16515e-05	8.157e-05	7.96546e-05	7.97349e-05	7.98448e-05	7.87216e-05	8.02349e-05	7.93051e-05	8.02061e-05	7.99776e-05	8.01029e-05	8.08802e-05	7.87905e-05	7.99506e-05	7.91229e-05	7.86723e-05	7.86545e-05	7.79609e-05	7.92503e-05	7.54556e-05	7.91068e-05	7.78467e-05	7.84372e-05	7.54097e-05	7.89462e-05	7.75859e-05	7.46186e-05	7.66725e-05	7.54124e-05
	0.475	8.04652e-05	8.40891e-05	8.43171e-05	8.37308e-05	8.31387e-05	8.23627e-05	8.38505e-05	8.32786e-05	8.11865e-05	8.18105e-05	8.26013e-05	8.28497e-05	8.08747e-05	8.17113e-05	8.07978e-05	7.99924e-05	8.13624e-05	8.16939e-05	8.03625e-05	8.08683e-05	8.08199e-05	7.88406e-05	7.88927e-05	7.89672e-05	7.7902e-05	7.934e-05	7.85098e-05	7.93598e-05	7.92803e-05	7.93492e-05	7.99808e-05	7.81543e-05	7.92057e-05	7.83703e-05	7.78173e-05	7.77752e-05	7.71356e-05	7.84915e-05	7.47974e-05	7.83184e-05	7.70989e-05	7.76574e-05	7.46649e-05	7.81225e-05	7.6481e-05	7.38601e-05	7.58949e-05	7.46289e-05
	0.47	7.95924e-05	8.33005e-05	8.34956e-05	8.28935e-05	8.23133e-05	8.15164e-05	8.30553e-05	8.25754e-05	8.03975e-05	8.08265e-05	8.17242e-05	8.20309e-05	8.01055e-05	8.09249e-05	8.00991e-05	7.92282e-05	8.05152e-05	8.0879e-05	7.96009e-05	8.01183e-05	7.99578e-05	7.80448e-05	7.81413e-05	7.81524e-05	7.7155e-05	7.85468e-05	7.77282e-05	7.85707e-05	7.83592e-05	7.85148e-05	7.91643e-05	7.72394e-05	7.84989e-05	7.75664e-05	7.72165e-05	7.70338e-05	7.6371e-05	7.76661e-05	7.41509e-05	7.75555e-05	7.63273e-05	7.68476e-05	7.39531e-05	7.73135e-05	7.57643e-05	7.31219e-05	7.51573e-05	7.39655e-05
	0.465	7.87849e-05	8.24875e-05	8.26537e-05	8.20552e-05	8.15201e-05	8.08964e-05	8.22577e-05	8.1615e-05	7.95639e-05	7.99698e-05	8.0961e-05	8.12289e-05	7.93044e-05	8.01301e-05	7.93523e-05	7.83414e-05	7.9906e-05	8.00006e-05	7.88402e-05	7.92979e-05	7.91508e-05	7.7287e-05	7.73356e-05	7.74398e-05	7.62931e-05	7.77796e-05	7.69378e-05	7.78777e-05	7.74667e-05	7.77067e-05	7.83368e-05	7.64537e-05	7.76621e-05	7.68033e-05	7.64061e-05	7.62901e-05	7.56172e-05	7.68255e-05	7.33258e-05	7.67304e-05	7.55811e-05	7.60939e-05	7.33061e-05	7.67089e-05	7.49105e-05	7.23423e-05	7.44668e-05	7.31591e-05
	0.46	7.80191e-05	8.17177e-05	8.18727e-05	8.12421e-05	8.0597e-05	8.00748e-05	8.14907e-05	8.07608e-05	7.88411e-05	7.91463e-05	8.02254e-05	8.04463e-05	7.85029e-05	7.96301e-05	7.84411e-05	7.73836e-05	7.90395e-05	7.92451e-05	7.80432e-05	7.8529e-05	7.84196e-05	7.65526e-05	7.65602e-05	7.66301e-05	7.53568e-05	7.7103e-05	7.61826e-05	7.70357e-05	7.67479e-05	7.69235e-05	7.76505e-05	7.59124e-05	7.68259e-05	7.60528e-05	7.55917e-05	7.55342e-05	7.48056e-05	7.60209e-05	7.25323e-05	7.60054e-05	7.48218e-05	7.52675e-05	7.2561e-05	7.59237e-05	7.42736e-05	7.16262e-05	7.36908e-05	7.24154e-05
	0.455	7.72572e-05	8.07985e-05	8.10296e-05	8.03456e-05	7.97735e-05	7.92077e-05	8.05811e-05	7.99945e-05	7.78786e-05	7.83338e-05	7.93672e-05	7.96266e-05	7.76592e-05	7.88136e-05	7.75591e-05	7.67969e-05	7.82715e-05	7.84176e-05	7.71837e-05	7.77337e-05	7.76529e-05	7.5765e-05	7.57976e-05	7.5867e-05	7.459e-05	7.63235e-05	7.53695e-05	7.62109e-05	7.60631e-05	7.61728e-05	7.67807e-05	7.4877e-05	7.6059e-05	7.52429e-05	7.49493e-05	7.49153e-05	7.40738e-05	7.5193e-05	7.17433e-05	7.52674e-05	7.38848e-05	7.45401e-05	7.16746e-05	7.49971e-05	7.36156e-05	7.08986e-05	7.28312e-05	7.16533e-05
	0.45	7.64403e-05	7.99016e-05	8.01217e-05	7.95108e-05	7.90005e-05	7.83546e-05	7.97696e-05	7.9236e-05	7.70391e-05	7.75001e-05	7.85438e-05	7.87636e-05	7.68478e-05	7.78931e-05	7.67695e-05	7.58879e-05	7.75148e-05	7.75841e-05	7.63349e-05	7.6985e-05	7.6803e-05	7.49469e-05	7.49918e-05	7.51413e-05	7.39388e-05	7.54802e-05	7.45559e-05	7.52563e-05	7.52991e-05	7.53394e-05	7.59718e-05	7.40204e-05	7.52427e-05	7.44319e-05	7.40841e-05	7.41883e-05	7.33209e-05	7.43319e-05	7.09901e-05	7.44995e-05	7.31143e-05	7.37069e-05	7.09377e-05	7.42324e-05	7.29178e-05	7.01357e-05	7.19946e-05	7.08028e-05
	0.445	7.57001e-05	7.9063e-05	7.92656e-05	7.86678e-05	7.82857e-05	7.7591e-05	7.89465e-05	7.82798e-05	7.62999e-05	7.6739e-05	7.7738e-05	7.79775e-05	7.60438e-05	7.68485e-05	7.60915e-05	7.5193e-05	7.66966e-05	7.67971e-05	7.56689e-05	7.6156e-05	7.6004e-05	7.41491e-05	7.41942e-05	7.43798e-05	7.3175e-05	7.47138e-05	7.37661e-05	7.46036e-05	7.46196e-05	7.45964e-05	7.5201e-05	7.33754e-05	7.44589e-05	7.36536e-05	7.32517e-05	7.32983e-05	7.25289e-05	7.36265e-05	7.02402e-05	7.36897e-05	7.23555e-05	7.29244e-05	7.00725e-05	7.33624e-05	7.23611e-05	6.93816e-05	7.13588e-05	7.01619e-05
	0.44	7.49325e-05	7.82529e-05	7.84101e-05	7.78705e-05	7.74364e-05	7.67766e-05	7.80894e-05	7.74249e-05	7.54872e-05	7.58577e-05	7.68871e-05	7.71371e-05	7.52411e-05	7.60345e-05	7.53385e-05	7.43352e-05	7.59031e-05	7.59734e-05	7.47473e-05	7.537e-05	7.51683e-05	7.32765e-05	7.34213e-05	7.35838e-05	7.23633e-05	7.38747e-05	7.28994e-05	7.38186e-05	7.37252e-05	7.37676e-05	7.4453e-05	7.25988e-05	7.37111e-05	7.2861e-05	7.24864e-05	7.2365e-05	7.17614e-05	7.27959e-05	6.94585e-05	7.29164e-05	7.17279e-05	7.21684e-05	6.92489e-05	7.25844e-05	7.13837e-05	6.86557e-05	7.057e-05	6.93674e-05
	0.435	7.41194e-05	7.73728e-05	7.756e-05	7.70243e-05	7.66015e-05	7.5949e-05	7.72812e-05	7.6571e-05	7.46666e-05	7.50403e-05	7.60432e-05	7.62722e-05	7.44234e-05	7.52214e-05	7.4514e-05	7.35368e-05	7.50597e-05	7.50989e-05	7.39296e-05	7.4542e-05	7.43484e-05	7.25361e-05	7.27405e-05	7.27514e-05	7.17185e-05	7.30638e-05	7.21103e-05	7.30345e-05	7.292e-05	7.29745e-05	7.36205e-05	7.17302e-05	7.29215e-05	7.1977e-05	7.17439e-05	7.16296e-05	7.09925e-05	7.1958e-05	6.87229e-05	7.21336e-05	7.079e-05	7.13701e-05	6.83982e-05	7.172e-05	7.04492e-05	6.7925e-05	6.97634e-05	6.86463e-05
	0.43	7.29979e-05	7.65217e-05	7.67726e-05	7.61749e-05	7.5751e-05	7.51276e-05	7.64578e-05	7.57677e-05	7.38919e-05	7.42544e-05	7.52292e-05	7.54611e-05	7.36638e-05	7.44053e-05	7.37064e-05	7.28089e-05	7.41992e-05	7.4253e-05	7.31535e-05	7.37522e-05	7.35685e-05	7.17212e-05	7.18189e-05	7.19594e-05	7.085e-05	7.22265e-05	7.13561e-05	7.227e-05	7.21012e-05	7.22115e-05	7.28308e-05	7.10609e-05	7.20888e-05	7.11785e-05	7.08027e-05	7.08121e-05	7.01916e-05	7.12547e-05	6.79489e-05	7.13194e-05	7.01554e-05	7.0597e-05	6.78076e-05	7.0867e-05	6.95964e-05	6.72011e-05	6.8987e-05	6.79572e-05
	0.425	7.21462e-05	7.57002e-05	7.59686e-05	7.53306e-05	7.49e-05	7.43134e-05	7.56115e-05	7.48874e-05	7.31449e-05	7.34443e-05	7.44249e-05	7.46024e-05	7.28274e-05	7.35734e-05	7.28888e-05	7.19968e-05	7.33737e-05	7.34777e-05	7.23381e-05	7.28831e-05	7.2763e-05	7.09363e-05	7.10231e-05	7.11827e-05	7.01353e-05	7.14316e-05	7.05501e-05	7.14448e-05	7.12998e-05	7.14752e-05	7.19909e-05	7.01581e-05	7.12686e-05	7.03601e-05	6.9992e-05	6.99123e-05	6.94307e-05	7.05216e-05	6.72201e-05	7.05391e-05	6.93562e-05	6.9828e-05	6.70731e-05	7.01042e-05	6.88745e-05	6.64351e-05	6.82117e-05	6.71787e-05
	0.42	7.13244e-05	7.48488e-05	7.50727e-05	7.4506e-05	7.40767e-05	7.34928e-05	7.47632e-05	7.40661e-05	7.22848e-05	7.26177e-05	7.35429e-05	7.38e-05	7.20072e-05	7.27276e-05	7.20402e-05	7.12963e-05	7.25452e-05	7.26542e-05	7.15271e-05	7.20911e-05	7.19504e-05	7.01405e-05	7.01755e-05	7.03628e-05	6.93691e-05	7.0754e-05	6.97381e-05	7.06205e-05	7.04591e-05	7.05839e-05	7.11934e-05	6.91982e-05	7.04284e-05	6.95958e-05	6.92682e-05	6.90422e-05	6.86171e-05	6.98088e-05	6.6433e-05	6.97345e-05	6.85792e-05	6.90212e-05	6.63129e-05	6.93892e-05	6.80505e-05	6.56215e-05	6.7441e-05	6.63846e-05
	0.415	7.05879e-05	7.40021e-05	7.42496e-05	7.36474e-05	7.32357e-05	7.25937e-05	7.39185e-05	7.32313e-05	7.14668e-05	7.1894e-05	7.27137e-05	7.29359e-05	7.11721e-05	7.18956e-05	7.12322e-05	7.03921e-05	7.16635e-05	7.18106e-05	7.07407e-05	7.12687e-05	7.10492e-05	6.93113e-05	6.94114e-05	6.95344e-05	6.85406e-05	6.99e-05	6.89368e-05	6.96825e-05	6.97352e-05	6.9769e-05	7.04194e-05	6.84289e-05	6.9645e-05	6.8784e-05	6.8477e-05	6.82857e-05	6.77918e-05	6.90134e-05	6.56859e-05	6.89303e-05	6.78036e-05	6.82062e-05	6.55448e-05	6.85132e-05	6.72909e-05	6.49255e-05	6.66661e-05	6.55043e-05
	0.41	6.97694e-05	7.30873e-05	7.33905e-05	7.27626e-05	7.24064e-05	7.18034e-05	7.30804e-05	7.2409e-05	7.06483e-05	7.10373e-05	7.19131e-05	7.21084e-05	7.0335e-05	7.11033e-05	7.04111e-05	6.9518e-05	7.0912e-05	7.09892e-05	6.99274e-05	7.04515e-05	7.02187e-05	6.86137e-05	6.86324e-05	6.87541e-05	6.76366e-05	6.91361e-05	6.81227e-05	6.90634e-05	6.89495e-05	6.89539e-05	6.95974e-05	6.75711e-05	6.88464e-05	6.80056e-05	6.77284e-05	6.75806e-05	6.6957e-05	6.82152e-05	6.49636e-05	6.81814e-05	6.71052e-05	6.74511e-05	6.47632e-05	6.77883e-05	6.65859e-05	6.41953e-05	6.59335e-05	6.47146e-05
	0.405	6.89829e-05	7.23191e-05	7.2548e-05	7.20044e-05	7.15526e-05	7.09811e-05	7.22342e-05	7.15631e-05	6.98204e-05	7.02277e-05	7.10279e-05	7.1227e-05	6.95494e-05	7.02643e-05	6.95846e-05	6.8686e-05	7.00239e-05	7.02789e-05	6.90962e-05	6.96446e-05	6.93704e-05	6.77064e-05	6.78408e-05	6.79345e-05	6.68854e-05	6.8258e-05	6.73159e-05	6.8264e-05	6.817e-05	6.80871e-05	6.88934e-05	6.69206e-05	6.80651e-05	6.72122e-05	6.69067e-05	6.68596e-05	6.61383e-05	6.74187e-05	6.41668e-05	6.73942e-05	6.62312e-05	6.66707e-05	6.39971e-05	6.69647e-05	6.59928e-05	6.34529e-05	6.51369e-05	6.39624e-05
	0.4	6.81578e-05	7.14901e-05	7.16757e-05	7.10878e-05	7.07278e-05	7.0132e-05	7.13743e-05	7.0729e-05	6.89969e-05	6.94079e-05	7.01491e-05	7.03792e-05	6.86838e-05	6.9418e-05	6.87552e-05	6.77962e-05	6.91794e-05	6.93652e-05	6.82879e-05	6.87897e-05	6.86107e-05	6.68976e-05	6.70096e-05	6.71084e-05	6.61991e-05	6.74307e-05	6.64881e-05	6.74955e-05	6.73182e-05	6.7272e-05	6.80611e-05	6.60776e-05	6.72532e-05	6.64026e-05	6.60416e-05	6.61043e-05	6.53623e-05	6.66245e-05	6.34081e-05	6.65847e-05	6.56014e-05	6.58404e-05	6.32536e-05	6.6214e-05	6.52412e-05	6.26731e-05	6.43629e-05	6.32275e-05
	0.395	6.73773e-05	7.06279e-05	7.07701e-05	7.02409e-05	6.98861e-05	6.93086e-05	7.05792e-05	6.98808e-05	6.81842e-05	6.85621e-05	6.92954e-05	6.95923e-05	6.78599e-05	6.85616e-05	6.79475e-05	6.69879e-05	6.8378e-05	6.85165e-05	6.74809e-05	6.79388e-05	6.76454e-05	6.6137e-05	6.61875e-05	6.63151e-05	6.543e-05	6.66271e-05	6.57102e-05	6.66979e-05	6.65399e-05	6.64653e-05	6.7201e-05	6.52133e-05	6.64871e-05	6.55969e-05	6.53667e-05	6.52562e-05	6.45643e-05	6.57963e-05	6.26695e-05	6.57535e-05	6.48526e-05	6.50523e-05	6.24767e-05	6.54062e-05	6.45438e-05	6.19391e-05	6.35877e-05	6.25758e-05
	0.39	6.65312e-05	6.97374e-05	6.99163e-05	6.94156e-05	6.90455e-05	6.84685e-05	6.96334e-05	6.90201e-05	6.73615e-05	6.77516e-05	6.84727e-05	6.87255e-05	6.7044e-05	6.77243e-05	6.71256e-05	6.62082e-05	6.75251e-05	6.77394e-05	6.66642e-05	6.71221e-05	6.6863e-05	6.53138e-05	6.54241e-05	6.54747e-05	6.46403e-05	6.58984e-05	6.49389e-05	6.58817e-05	6.57248e-05	6.56734e-05	6.63642e-05	6.44462e-05	6.5646e-05	6.48014e-05	6.45109e-05	6.45119e-05	6.38108e-05	6.50013e-05	6.19417e-05	6.49692e-05	6.40056e-05	6.42714e-05	6.17111e-05	6.45064e-05	6.37722e-05	6.11853e-05	6.2819e-05	6.17485e-05
	0.385	6.57003e-05	6.88809e-05	6.9066e-05	6.85557e-05	6.81791e-05	6.75951e-05	6.88009e-05	6.81739e-05	6.65017e-05	6.69014e-05	6.76417e-05	6.78929e-05	6.61878e-05	6.69206e-05	6.62575e-05	6.53416e-05	6.67133e-05	6.67416e-05	6.58464e-05	6.62695e-05	6.59528e-05	6.45057e-05	6.46116e-05	6.46627e-05	6.36862e-05	6.50679e-05	6.40819e-05	6.50651e-05	6.48945e-05	6.48717e-05	6.55014e-05	6.36767e-05	6.48592e-05	6.39789e-05	6.36e-05	6.36685e-05	6.30298e-05	6.41839e-05	6.11287e-05	6.41626e-05	6.32474e-05	6.34597e-05	6.09539e-05	6.37395e-05	6.294e-05	6.04188e-05	6.20858e-05	6.09951e-05
	0.38	6.48656e-05	6.80103e-05	6.81919e-05	6.77031e-05	6.73405e-05	6.67562e-05	6.79267e-05	6.73407e-05	6.56773e-05	6.60948e-05	6.68264e-05	6.70524e-05	6.53605e-05	6.60973e-05	6.54438e-05	6.45725e-05	6.58859e-05	6.59042e-05	6.50251e-05	6.54699e-05	6.51239e-05	6.36827e-05	6.38306e-05	6.38835e-05	6.28512e-05	6.43119e-05	6.32984e-05	6.42736e-05	6.40787e-05	6.40635e-05	6.47312e-05	6.28651e-05	6.4029e-05	6.31874e-05	6.2851e-05	6.28743e-05	6.22619e-05	6.33995e-05	6.03873e-05	6.33012e-05	6.26038e-05	6.26473e-05	6.01729e-05	6.30269e-05	6.22005e-05	5.97059e-05	6.13184e-05	6.02237e-05
	0.375	6.40396e-05	6.7164e-05	6.73244e-05	6.68774e-05	6.64867e-05	6.59097e-05	6.70893e-05	6.64693e-05	6.48752e-05	6.52482e-05	6.59607e-05	6.62057e-05	6.45369e-05	6.52262e-05	6.4612e-05	6.37482e-05	6.50633e-05	6.52014e-05	6.42094e-05	6.46548e-05	6.4294e-05	6.28703e-05	6.30211e-05	6.30647e-05	6.20187e-05	6.34661e-05	6.25136e-05	6.34853e-05	6.32813e-05	6.32411e-05	6.39036e-05	6.22841e-05	6.31873e-05	6.24203e-05	6.19252e-05	6.20439e-05	6.1446e-05	6.25547e-05	5.96124e-05	6.25778e-05	6.16435e-05	6.18455e-05	5.9419e-05	6.21717e-05	6.13927e-05	5.89107e-05	6.05245e-05	5.93567e-05
	0.37	6.32357e-05	6.63169e-05	6.64469e-05	6.60009e-05	6.56278e-05	6.50551e-05	6.62299e-05	6.56188e-05	6.39627e-05	6.44261e-05	6.50837e-05	6.53412e-05	6.36493e-05	6.4389e-05	6.37607e-05	6.29289e-05	6.42262e-05	6.44464e-05	6.34004e-05	6.38065e-05	6.34424e-05	6.20625e-05	6.23174e-05	6.22352e-05	6.12238e-05	6.26808e-05	6.16542e-05	6.26584e-05	6.24906e-05	6.24174e-05	6.30953e-05	6.14583e-05	6.238e-05	6.15961e-05	6.11338e-05	6.12481e-05	6.06044e-05	6.1796e-05	5.88774e-05	6.17381e-05	6.08396e-05	6.10315e-05	5.85352e-05	6.13215e-05	6.05803e-05	5.82001e-05	5.97411e-05	5.85772e-05
	0.365	6.24693e-05	6.54473e-05	6.5595e-05	6.51595e-05	6.47658e-05	6.42225e-05	6.53726e-05	6.47766e-05	6.31749e-05	6.35735e-05	6.42505e-05	6.44991e-05	6.27882e-05	6.35162e-05	6.292e-05	6.21263e-05	6.33542e-05	6.34628e-05	6.25614e-05	6.29723e-05	6.26103e-05	6.12443e-05	6.14982e-05	6.1437e-05	6.04449e-05	6.18599e-05	6.079e-05	6.1801e-05	6.16676e-05	6.15924e-05	6.2268e-05	6.03797e-05	6.15796e-05	6.07619e-05	6.03573e-05	6.05399e-05	5.97926e-05	6.09695e-05	5.81137e-05	6.09617e-05	5.99655e-05	6.02556e-05	5.77979e-05	6.05466e-05	5.96798e-05	5.73785e-05	5.89542e-05	5.78e-05
	0.36	6.16359e-05	6.45988e-05	6.47316e-05	6.42604e-05	6.3891e-05	6.33883e-05	6.45239e-05	6.39084e-05	6.23529e-05	6.2748e-05	6.34e-05	6.36569e-05	6.20204e-05	6.27155e-05	6.20966e-05	6.12751e-05	6.25985e-05	6.25563e-05	6.17537e-05	6.21441e-05	6.17613e-05	6.04458e-05	6.06681e-05	6.05945e-05	5.96485e-05	6.10406e-05	6.01147e-05	6.1003e-05	6.08298e-05	6.08091e-05	6.14297e-05	5.96196e-05	6.07359e-05	5.99592e-05	5.95294e-05	5.96718e-05	5.90204e-05	6.0177e-05	5.72332e-05	6.01368e-05	5.91952e-05	5.94606e-05	5.70203e-05	5.97602e-05	5.89715e-05	5.66069e-05	5.8178e-05	5.70129e-05
	0.355	6.07927e-05	6.37005e-05	6.38521e-05	6.34349e-05	6.30579e-05	6.25352e-05	6.36859e-05	6.30674e-05	6.15174e-05	6.18997e-05	6.2562e-05	6.27845e-05	6.12208e-05	6.18759e-05	6.12563e-05	6.04203e-05	6.17678e-05	6.16773e-05	6.09225e-05	6.13197e-05	6.09104e-05	5.96034e-05	5.98593e-05	5.98046e-05	5.88129e-05	6.02808e-05	5.92341e-05	6.0182e-05	5.99133e-05	5.99801e-05	6.05629e-05	5.87437e-05	5.99557e-05	5.91474e-05	5.87391e-05	5.89249e-05	5.82361e-05	5.93538e-05	5.65114e-05	5.93391e-05	5.83861e-05	5.86499e-05	5.62453e-05	5.89268e-05	5.81651e-05	5.58434e-05	5.74002e-05	5.62018e-05
	0.35	5.99571e-05	6.28369e-05	6.2987e-05	6.25469e-05	6.21969e-05	6.16862e-05	6.28046e-05	6.21986e-05	6.06644e-05	6.10166e-05	6.16613e-05	6.19355e-05	6.02791e-05	6.1024e-05	6.0414e-05	5.96073e-05	6.09158e-05	6.08085e-05	6.0135e-05	6.04099e-05	6.00736e-05	5.88056e-05	5.90426e-05	5.89783e-05	5.80297e-05	5.93893e-05	5.84773e-05	5.93397e-05	5.90988e-05	5.91512e-05	5.97572e-05	5.79124e-05	5.91267e-05	5.83326e-05	5.79262e-05	5.80484e-05	5.74729e-05	5.8485e-05	5.57497e-05	5.85472e-05	5.75959e-05	5.78165e-05	5.54553e-05	5.81014e-05	5.73897e-05	5.50836e-05	5.66205e-05	5.5294e-05
	0.345	5.91044e-05	6.19976e-05	6.2155e-05	6.167e-05	6.13319e-05	6.08386e-05	6.19568e-05	6.13568e-05	5.98268e-05	6.01388e-05	6.0838e-05	6.10819e-05	5.94887e-05	6.01882e-05	5.95949e-05	5.87687e-05	6.00851e-05	5.9964e-05	5.92906e-05	5.96186e-05	5.9278e-05	5.79768e-05	5.82501e-05	5.81992e-05	5.72422e-05	5.85854e-05	5.76575e-05	5.85537e-05	5.83002e-05	5.83489e-05	5.89293e-05	5.70848e-05	5.82842e-05	5.75322e-05	5.7119e-05	5.72337e-05	5.67098e-05	5.77436e-05	5.50272e-05	5.77196e-05	5.68064e-05	5.70298e-05	5.47011e-05	5.73063e-05	5.66046e-05	5.43298e-05	5.58511e-05	5.45033e-05
	0.34	5.82548e-05	6.11283e-05	6.12291e-05	6.08078e-05	6.04694e-05	5.99908e-05	6.10917e-05	6.05053e-05	5.89989e-05	5.93094e-05	6.00315e-05	6.02189e-05	5.85881e-05	5.93363e-05	5.87675e-05	5.795e-05	5.92375e-05	5.91225e-05	5.84421e-05	5.8775e-05	5.84246e-05	5.71852e-05	5.74302e-05	5.73832e-05	5.63894e-05	5.77898e-05	5.68297e-05	5.77058e-05	5.75494e-05	5.7519e-05	5.80527e-05	5.63034e-05	5.74646e-05	5.67167e-05	5.63185e-05	5.64382e-05	5.58971e-05	5.69229e-05	5.42286e-05	5.69018e-05	5.60041e-05	5.61976e-05	5.3909e-05	5.64935e-05	5.57731e-05	5.35538e-05	5.50489e-05	5.37514e-05
	0.335	5.73736e-05	6.02487e-05	6.03544e-05	5.99235e-05	5.96496e-05	5.91456e-05	6.02156e-05	5.95938e-05	5.81567e-05	5.8442e-05	5.91749e-05	5.93551e-05	5.78186e-05	5.84685e-05	5.79009e-05	5.71037e-05	5.8397e-05	5.82906e-05	5.75945e-05	5.79194e-05	5.76034e-05	5.63699e-05	5.65922e-05	5.65413e-05	5.55753e-05	5.6949e-05	5.60304e-05	5.68802e-05	5.67467e-05	5.67151e-05	5.73158e-05	5.5486e-05	5.66214e-05	5.58926e-05	5.55527e-05	5.56485e-05	5.50659e-05	5.6034e-05	5.34607e-05	5.60826e-05	5.52026e-05	5.5369e-05	5.31272e-05	5.57463e-05	5.49738e-05	5.2785e-05	5.42575e-05	5.29198e-05
	0.33	5.6506e-05	5.93758e-05	5.94923e-05	5.90772e-05	5.87985e-05	5.82922e-05	5.93746e-05	5.87614e-05	5.72972e-05	5.7604e-05	5.83199e-05	5.85365e-05	5.70293e-05	5.76363e-05	5.70709e-05	5.63016e-05	5.75818e-05	5.74645e-05	5.67712e-05	5.71297e-05	5.67623e-05	5.55668e-05	5.57425e-05	5.57155e-05	5.47691e-05	5.61353e-05	5.52343e-05	5.60379e-05	5.5941e-05	5.59117e-05	5.64755e-05	5.47025e-05	5.58011e-05	5.5094e-05	5.4767e-05	5.48021e-05	5.42758e-05	5.52181e-05	5.26884e-05	5.52585e-05	5.44187e-05	5.46095e-05	5.23959e-05	5.49285e-05	5.42221e-05	5.20103e-05	5.34789e-05	5.22013e-05
	0.325	5.56549e-05	5.85112e-05	5.86217e-05	5.82189e-05	5.79124e-05	5.74497e-05	5.84545e-05	5.79032e-05	5.64844e-05	5.67701e-05	5.74367e-05	5.76717e-05	5.60594e-05	5.68003e-05	5.6283e-05	5.54414e-05	5.67152e-05	5.67862e-05	5.5977e-05	5.62536e-05	5.59148e-05	5.47206e-05	5.49744e-05	5.48856e-05	5.39571e-05	5.53089e-05	5.44516e-05	5.52163e-05	5.51275e-05	5.50725e-05	5.5589e-05	5.38926e-05	5.49553e-05	5.42924e-05	5.3903e-05	5.39709e-05	5.34841e-05	5.44184e-05	5.19316e-05	5.44289e-05	5.37086e-05	5.38254e-05	5.15987e-05	5.40892e-05	5.34008e-05	5.12297e-05	5.26739e-05	5.14546e-05
	0.32	5.48199e-05	5.765e-05	5.77418e-05	5.73484e-05	5.70347e-05	5.65904e-05	5.76019e-05	5.70664e-05	5.56163e-05	5.59058e-05	5.65671e-05	5.6803e-05	5.51714e-05	5.59525e-05	5.54482e-05	5.46125e-05	5.5848e-05	5.59679e-05	5.51371e-05	5.54377e-05	5.52031e-05	5.38828e-05	5.41391e-05	5.4063e-05	5.31138e-05	5.44843e-05	5.3548e-05	5.43961e-05	5.42882e-05	5.42375e-05	5.47987e-05	5.30671e-05	5.41724e-05	5.34532e-05	5.31545e-05	5.31562e-05	5.26283e-05	5.36217e-05	5.11301e-05	5.36145e-05	5.29327e-05	5.2991e-05	5.07886e-05	5.32089e-05	5.26209e-05	5.04741e-05	5.1888e-05	5.0671e-05
	0.315	5.4003e-05	5.67734e-05	5.68638e-05	5.6485e-05	5.61977e-05	5.57486e-05	5.67343e-05	5.62014e-05	5.47638e-05	5.50835e-05	5.57277e-05	5.5933e-05	5.44016e-05	5.51005e-05	5.45751e-05	5.37903e-05	5.50166e-05	5.51187e-05	5.43543e-05	5.45691e-05	5.43695e-05	5.30523e-05	5.33056e-05	5.32289e-05	5.23615e-05	5.36588e-05	5.26825e-05	5.35428e-05	5.34715e-05	5.34299e-05	5.39162e-05	5.22552e-05	5.33626e-05	5.26405e-05	5.23085e-05	5.23863e-05	5.18624e-05	5.27941e-05	5.03661e-05	5.28169e-05	5.20123e-05	5.21975e-05	5.00087e-05	5.23573e-05	5.18069e-05	4.97069e-05	5.11107e-05	4.98382e-05
	0.31	5.31386e-05	5.58842e-05	5.59832e-05	5.56129e-05	5.53365e-05	5.48862e-05	5.58751e-05	5.53271e-05	5.39306e-05	5.42158e-05	5.48592e-05	5.50804e-05	5.34855e-05	5.42467e-05	5.36996e-05	5.29535e-05	5.41493e-05	5.42658e-05	5.34788e-05	5.37316e-05	5.34221e-05	5.22159e-05	5.24894e-05	5.24163e-05	5.15248e-05	5.28378e-05	5.19131e-05	5.27438e-05	5.26629e-05	5.26311e-05	5.30283e-05	5.14549e-05	5.24733e-05	5.18191e-05	5.14848e-05	5.1571e-05	5.10474e-05	5.19561e-05	4.95799e-05	5.1998e-05	5.12222e-05	5.14069e-05	4.92262e-05	5.15551e-05	5.10095e-05	4.89202e-05	5.03142e-05	4.90432e-05
	0.305	5.22758e-05	5.49933e-05	5.51028e-05	5.47463e-05	5.44386e-05	5.40243e-05	5.50064e-05	5.44452e-05	5.30894e-05	5.33656e-05	5.39678e-05	5.42195e-05	5.26651e-05	5.33915e-05	5.2861e-05	5.21589e-05	5.32915e-05	5.34157e-05	5.26117e-05	5.28631e-05	5.25377e-05	5.13919e-05	5.16695e-05	5.15821e-05	5.07334e-05	5.1995e-05	5.11414e-05	5.1919e-05	5.18355e-05	5.17947e-05	5.22249e-05	5.06727e-05	5.16853e-05	5.09933e-05	5.06669e-05	5.06807e-05	5.02048e-05	5.11424e-05	4.87937e-05	5.11665e-05	5.0396e-05	5.05526e-05	4.84375e-05	5.08079e-05	5.02165e-05	4.8111e-05	4.94961e-05	4.82768e-05
	0.3	5.14325e-05	5.41214e-05	5.42294e-05	5.38652e-05	5.35899e-05	5.31639e-05	5.40936e-05	5.34962e-05	5.22371e-05	5.25158e-05	5.30859e-05	5.33464e-05	5.18887e-05	5.25604e-05	5.20172e-05	5.12831e-05	5.24336e-05	5.25555e-05	5.17935e-05	5.20454e-05	5.16367e-05	5.05936e-05	5.0838e-05	5.07427e-05	4.99169e-05	5.11696e-05	5.02931e-05	5.10877e-05	5.10062e-05	5.09855e-05	5.13736e-05	4.98907e-05	5.084e-05	5.01898e-05	4.98355e-05	4.98972e-05	4.94281e-05	5.03127e-05	4.80148e-05	5.03321e-05	4.95847e-05	4.97141e-05	4.7641e-05	4.99473e-05	4.93964e-05	4.73678e-05	4.87227e-05	4.74908e-05
	0.295	5.06343e-05	5.32491e-05	5.33591e-05	5.29996e-05	5.27242e-05	5.23438e-05	5.32508e-05	5.26974e-05	5.14027e-05	5.16769e-05	5.22574e-05	5.24898e-05	5.10161e-05	5.16779e-05	5.11816e-05	5.04502e-05	5.15947e-05	5.17148e-05	5.09837e-05	5.12066e-05	5.08418e-05	4.9765e-05	5.00142e-05	4.99442e-05	4.90971e-05	5.0339e-05	4.94719e-05	5.02655e-05	5.01757e-05	5.01706e-05	5.06155e-05	4.90805e-05	5.00497e-05	4.93616e-05	4.90474e-05	4.90622e-05	4.86479e-05	4.95123e-05	4.71998e-05	4.95624e-05	4.88311e-05	4.89132e-05	4.68685e-05	4.91321e-05	4.85917e-05	4.65845e-05	4.79226e-05	4.67983e-05
	0.29	4.97776e-05	5.23449e-05	5.24645e-05	5.21074e-05	5.18055e-05	5.14937e-05	5.23507e-05	5.18315e-05	5.05456e-05	5.08327e-05	5.13756e-05	5.16118e-05	5.01673e-05	5.08366e-05	5.03065e-05	4.9628e-05	5.07287e-05	5.08584e-05	5.01416e-05	5.03452e-05	4.99883e-05	4.89285e-05	4.91754e-05	4.91021e-05	4.82559e-05	4.95878e-05	4.86589e-05	4.94209e-05	4.93477e-05	4.93286e-05	4.97863e-05	4.82679e-05	4.9168e-05	4.85392e-05	4.82755e-05	4.83523e-05	4.78348e-05	4.8689e-05	4.64379e-05	4.87125e-05	4.80896e-05	4.80941e-05	4.60905e-05	4.83004e-05	4.77652e-05	4.5821e-05	4.71375e-05	4.59802e-05
	0.285	4.89376e-05	5.14674e-05	5.15907e-05	5.12322e-05	5.09443e-05	5.06901e-05	5.14669e-05	5.09513e-05	4.96841e-05	4.99763e-05	5.05263e-05	5.07516e-05	4.92592e-05	4.99605e-05	4.9476e-05	4.87903e-05	4.98752e-05	4.99691e-05	4.92432e-05	4.94991e-05	4.91579e-05	4.8096e-05	4.83503e-05	4.82435e-05	4.74227e-05	4.87843e-05	4.77592e-05	4.85641e-05	4.85144e-05	4.84876e-05	4.89399e-05	4.74353e-05	4.8333e-05	4.77195e-05	4.74648e-05	4.75158e-05	4.69765e-05	4.78647e-05	4.56499e-05	4.78464e-05	4.72723e-05	4.7255e-05	4.52947e-05	4.74757e-05	4.69133e-05	4.50504e-05	4.63281e-05	4.5104e-05
	0.28	4.81071e-05	5.05763e-05	5.07038e-05	5.038e-05	5.01069e-05	4.98114e-05	5.06128e-05	5.00789e-05	4.88257e-05	4.91101e-05	4.96674e-05	4.98994e-05	4.84472e-05	4.91156e-05	4.86325e-05	4.79487e-05	4.90294e-05	4.91326e-05	4.84012e-05	4.86412e-05	4.8336e-05	4.72684e-05	4.75149e-05	4.74278e-05	4.66173e-05	4.79152e-05	4.70003e-05	4.77712e-05	4.77009e-05	4.76592e-05	4.81039e-05	4.66144e-05	4.75234e-05	4.69089e-05	4.66595e-05	4.67067e-05	4.61763e-05	4.70576e-05	4.49088e-05	4.70363e-05	4.64858e-05	4.64509e-05	4.45332e-05	4.66459e-05	4.61724e-05	4.42858e-05	4.55365e-05	4.43116e-05
	0.275	4.72729e-05	4.96938e-05	4.98532e-05	4.9504e-05	4.92337e-05	4.89433e-05	4.97027e-05	4.92182e-05	4.7983e-05	4.82564e-05	4.87851e-05	4.90195e-05	4.75924e-05	4.82546e-05	4.77929e-05	4.70763e-05	4.81507e-05	4.82786e-05	4.75761e-05	4.78113e-05	4.74817e-05	4.64351e-05	4.66974e-05	4.65908e-05	4.57762e-05	4.70496e-05	4.61216e-05	4.6922e-05	4.68499e-05	4.67964e-05	4.72572e-05	4.57984e-05	4.67053e-05	4.60846e-05	4.58292e-05	4.59178e-05	4.5309e-05	4.62273e-05	4.41438e-05	4.622e-05	4.56556e-05	4.56524e-05	4.37407e-05	4.58333e-05	4.53775e-05	4.34863e-05	4.47293e-05	4.35693e-05
	0.27	4.64353e-05	4.8812e-05	4.8951e-05	4.85966e-05	4.83574e-05	4.7942e-05	4.88111e-05	4.83476e-05	4.71108e-05	4.74016e-05	4.79005e-05	4.81391e-05	4.67218e-05	4.7388e-05	4.6881e-05	4.62618e-05	4.73028e-05	4.74233e-05	4.67152e-05	4.69837e-05	4.66021e-05	4.55808e-05	4.58614e-05	4.5769e-05	4.49723e-05	4.61929e-05	4.51984e-05	4.60445e-05	4.60104e-05	4.59517e-05	4.64082e-05	4.499e-05	4.58163e-05	4.52672e-05	4.50154e-05	4.50188e-05	4.45592e-05	4.54098e-05	4.33196e-05	4.53766e-05	4.48497e-05	4.48271e-05	4.29361e-05	4.50182e-05	4.45537e-05	4.26726e-05	4.39265e-05	4.28345e-05
	0.265	4.55873e-05	4.79256e-05	4.80628e-05	4.77362e-05	4.74945e-05	4.70913e-05	4.79369e-05	4.74871e-05	4.62497e-05	4.65456e-05	4.70485e-05	4.72757e-05	4.59405e-05	4.65552e-05	4.60803e-05	4.54201e-05	4.64609e-05	4.65523e-05	4.58753e-05	4.61353e-05	4.57654e-05	4.47464e-05	4.50528e-05	4.49147e-05	4.41707e-05	4.53651e-05	4.44321e-05	4.52405e-05	4.51795e-05	4.51657e-05	4.5581e-05	4.41606e-05	4.49685e-05	4.44231e-05	4.41774e-05	4.42258e-05	4.37352e-05	4.45739e-05	4.25483e-05	4.45721e-05	4.39652e-05	4.39951e-05	4.21555e-05	4.41576e-05	4.37348e-05	4.19179e-05	4.3159e-05	4.19909e-05
	0.26	4.47253e-05	4.70443e-05	4.71575e-05	4.68623e-05	4.66099e-05	4.62215e-05	4.70529e-05	4.66164e-05	4.54015e-05	4.56802e-05	4.61637e-05	4.6423e-05	4.49699e-05	4.56904e-05	4.52161e-05	4.45715e-05	4.55972e-05	4.57039e-05	4.50338e-05	4.52823e-05	4.49096e-05	4.39121e-05	4.42182e-05	4.40764e-05	4.33442e-05	4.45286e-05	4.36597e-05	4.43844e-05	4.43329e-05	4.43387e-05	4.47276e-05	4.3345e-05	4.41338e-05	4.36024e-05	4.33147e-05	4.34069e-05	4.29083e-05	4.37604e-05	4.17148e-05	4.37479e-05	4.31242e-05	4.3184e-05	4.13587e-05	4.33624e-05	4.2918e-05	4.11312e-05	4.23458e-05	4.12503e-05
	0.255	4.38299e-05	4.61531e-05	4.62751e-05	4.59686e-05	4.57051e-05	4.5324e-05	4.61665e-05	4.57247e-05	4.4544e-05	4.48187e-05	4.5294e-05	4.55351e-05	4.40881e-05	4.48326e-05	4.42958e-05	4.37407e-05	4.47258e-05	4.48301e-05	4.4184e-05	4.44095e-05	4.40594e-05	4.3101e-05	4.33804e-05	4.32724e-05	4.25237e-05	4.3694e-05	4.2798e-05	4.35429e-05	4.35082e-05	4.34898e-05	4.38978e-05	4.25022e-05	4.33213e-05	4.27852e-05	4.24869e-05	4.25838e-05	4.21015e-05	4.293e-05	4.09509e-05	4.29189e-05	4.23049e-05	4.23666e-05	4.05643e-05	4.25507e-05	4.21005e-05	4.03474e-05	4.15266e-05	4.04213e-05
	0.25	4.30175e-05	4.52822e-05	4.5416e-05	4.50948e-05	4.47906e-05	4.4464e-05	4.52757e-05	4.4852e-05	4.37197e-05	4.39558e-05	4.44253e-05	4.46674e-05	4.32425e-05	4.39764e-05	4.34479e-05	4.29131e-05	4.38812e-05	4.39741e-05	4.33702e-05	4.35476e-05	4.32212e-05	4.22686e-05	4.25377e-05	4.24276e-05	4.16884e-05	4.28494e-05	4.1962e-05	4.27094e-05	4.26831e-05	4.2676e-05	4.30487e-05	4.17119e-05	4.24825e-05	4.19644e-05	4.16727e-05	4.17575e-05	4.12931e-05	4.21067e-05	4.01986e-05	4.21001e-05	4.14961e-05	4.15617e-05	3.97879e-05	4.17122e-05	4.1274e-05	3.95796e-05	4.07319e-05	3.96511e-05
	0.245	4.21587e-05	4.43913e-05	4.45284e-05	4.41971e-05	4.39165e-05	4.35908e-05	4.43811e-05	4.39787e-05	4.28322e-05	4.30994e-05	4.35559e-05	4.38068e-05	4.2528e-05	4.31109e-05	4.25799e-05	4.20412e-05	4.30211e-05	4.31253e-05	4.25012e-05	4.26998e-05	4.23477e-05	4.13842e-05	4.17331e-05	4.16122e-05	4.08733e-05	4.20165e-05	4.11236e-05	4.18547e-05	4.18367e-05	4.18175e-05	4.22128e-05	4.08804e-05	4.16761e-05	4.11246e-05	4.08529e-05	4.08833e-05	4.0471e-05	4.12707e-05	3.94068e-05	4.12594e-05	4.06825e-05	4.07445e-05	3.89928e-05	4.08738e-05	4.04563e-05	3.88008e-05	3.9911e-05	3.88322e-05
	0.24	4.13048e-05	4.34922e-05	4.36119e-05	4.33239e-05	4.30902e-05	4.27246e-05	4.34538e-05	4.31043e-05	4.19686e-05	4.22292e-05	4.26826e-05	4.29241e-05	4.15327e-05	4.22411e-05	4.18045e-05	4.11995e-05	4.21484e-05	4.22545e-05	4.16546e-05	4.18715e-05	4.15032e-05	4.05804e-05	4.08743e-05	4.07847e-05	4.00172e-05	4.11702e-05	4.02741e-05	4.09845e-05	4.10019e-05	4.09942e-05	4.13543e-05	4.0069e-05	4.0808e-05	4.02908e-05	4.00216e-05	4.00689e-05	3.96787e-05	4.04393e-05	3.86248e-05	4.04109e-05	3.98595e-05	3.98841e-05	3.81921e-05	4.00518e-05	3.96693e-05	3.80294e-05	3.90976e-05	3.81234e-05
	0.235	4.04506e-05	4.25998e-05	4.28011e-05	4.24449e-05	4.22421e-05	4.18724e-05	4.25956e-05	4.22307e-05	4.10975e-05	4.13743e-05	4.18156e-05	4.2047e-05	4.06895e-05	4.14023e-05	4.09471e-05	4.03518e-05	4.12944e-05	4.1394e-05	4.08157e-05	4.10049e-05	4.06579e-05	3.97278e-05	4.00188e-05	3.99566e-05	3.91873e-05	4.03486e-05	3.94027e-05	4.01616e-05	4.01776e-05	4.01398e-05	4.05032e-05	3.92359e-05	4.00269e-05	3.94817e-05	3.91929e-05	3.92661e-05	3.88887e-05	3.96216e-05	3.78456e-05	3.95793e-05	3.90375e-05	3.9066e-05	3.7431e-05	3.92431e-05	3.88338e-05	3.72621e-05	3.83002e-05	3.73279e-05
	0.23	3.96009e-05	4.17041e-05	4.19101e-05	4.15654e-05	4.13585e-05	4.10087e-05	4.16969e-05	4.13459e-05	4.02587e-05	4.05046e-05	4.09478e-05	4.11659e-05	3.98263e-05	4.05352e-05	4.01013e-05	3.94923e-05	4.04379e-05	4.05263e-05	3.99478e-05	4.01634e-05	3.9798e-05	3.88944e-05	3.91871e-05	3.9084e-05	3.8386e-05	3.94727e-05	3.86617e-05	3.93137e-05	3.9334e-05	3.9298e-05	3.96514e-05	3.8415e-05	3.91471e-05	3.86499e-05	3.84025e-05	3.8451e-05	3.80434e-05	3.87709e-05	3.70479e-05	3.8743e-05	3.82236e-05	3.8233e-05	3.66214e-05	3.84546e-05	3.80408e-05	3.64464e-05	3.74926e-05	3.6546e-05
	0.225	3.87514e-05	4.0811e-05	4.10284e-05	4.06739e-05	4.0485e-05	4.01044e-05	4.07748e-05	4.0455e-05	3.94032e-05	3.96384e-05	4.00631e-05	4.03013e-05	3.89678e-05	3.96617e-05	3.92612e-05	3.86581e-05	3.95743e-05	3.96733e-05	3.909e-05	3.93097e-05	3.89468e-05	3.80726e-05	3.83783e-05	3.82618e-05	3.75862e-05	3.86326e-05	3.78242e-05	3.84542e-05	3.84807e-05	3.8467e-05	3.88027e-05	3.75804e-05	3.82808e-05	3.77993e-05	3.75917e-05	3.76534e-05	3.72057e-05	3.79467e-05	3.62308e-05	3.79056e-05	3.73887e-05	3.74101e-05	3.58337e-05	3.758e-05	3.7218e-05	3.56853e-05	3.66794e-05	3.57582e-05
	0.22	3.79167e-05	3.99292e-05	4.01511e-05	3.98007e-05	3.96065e-05	3.92431e-05	3.99085e-05	3.95844e-05	3.85484e-05	3.87639e-05	3.92136e-05	3.94272e-05	3.81487e-05	3.8805e-05	3.83981e-05	3.78192e-05	3.8736e-05	3.88094e-05	3.82696e-05	3.84483e-05	3.80877e-05	3.7241e-05	3.75407e-05	3.74477e-05	3.67662e-05	3.77808e-05	3.69736e-05	3.75981e-05	3.76543e-05	3.76371e-05	3.79676e-05	3.67589e-05	3.74416e-05	3.70029e-05	3.67917e-05	3.67795e-05	3.63956e-05	3.71279e-05	3.54739e-05	3.70837e-05	3.65456e-05	3.66081e-05	3.50418e-05	3.67779e-05	3.63882e-05	3.48879e-05	3.58687e-05	3.49616e-05
	0.215	3.70679e-05	3.9022e-05	3.92446e-05	3.88891e-05	3.87152e-05	3.83717e-05	3.90086e-05	3.86937e-05	3.76586e-05	3.79101e-05	3.83329e-05	3.85478e-05	3.72531e-05	3.79538e-05	3.75079e-05	3.69649e-05	3.78718e-05	3.79454e-05	3.74463e-05	3.75936e-05	3.72457e-05	3.63963e-05	3.66829e-05	3.65919e-05	3.59424e-05	3.69505e-05	3.61825e-05	3.67436e-05	3.6808e-05	3.68059e-05	3.7109e-05	3.59149e-05	3.65883e-05	3.61509e-05	3.5959e-05	3.5903e-05	3.55582e-05	3.62939e-05	3.46418e-05	3.62479e-05	3.57502e-05	3.57825e-05	3.42525e-05	3.59235e-05	3.55552e-05	3.41068e-05	3.50563e-05	3.41597e-05
	0.21	3.61986e-05	3.81242e-05	3.83587e-05	3.79939e-05	3.78208e-05	3.75942e-05	3.80898e-05	3.78059e-05	3.68011e-05	3.7045e-05	3.74378e-05	3.7664e-05	3.6376e-05	3.70794e-05	3.66424e-05	3.61101e-05	3.7001e-05	3.70757e-05	3.65784e-05	3.67171e-05	3.64455e-05	3.55454e-05	3.58306e-05	3.57764e-05	3.5096e-05	3.60893e-05	3.53531e-05	3.58693e-05	3.59742e-05	3.59558e-05	3.62593e-05	3.51129e-05	3.57407e-05	3.5323e-05	3.51196e-05	3.50812e-05	3.47521e-05	3.54689e-05	3.3887e-05	3.54171e-05	3.49167e-05	3.49506e-05	3.34622e-05	3.50966e-05	3.47576e-05	3.32962e-05	3.42694e-05	3.33822e-05
	0.205	3.53607e-05	3.72385e-05	3.74677e-05	3.71234e-05	3.69425e-05	3.67386e-05	3.71877e-05	3.69271e-05	3.59668e-05	3.61832e-05	3.65778e-05	3.67889e-05	3.55261e-05	3.62172e-05	3.58011e-05	3.52629e-05	3.61437e-05	3.62255e-05	3.5725e-05	3.58776e-05	3.55924e-05	3.47222e-05	3.49951e-05	3.49089e-05	3.4281e-05	3.52668e-05	3.45389e-05	3.50253e-05	3.51399e-05	3.5109e-05	3.54249e-05	3.42786e-05	3.49361e-05	3.44969e-05	3.43007e-05	3.42908e-05	3.39422e-05	3.46352e-05	3.3118e-05	3.45852e-05	3.41085e-05	3.41173e-05	3.26853e-05	3.42994e-05	3.39493e-05	3.25234e-05	3.3473e-05	3.25822e-05
	0.2	3.44968e-05	3.63296e-05	3.65505e-05	3.62349e-05	3.6049e-05	3.58394e-05	3.6296e-05	3.60336e-05	3.50593e-05	3.53075e-05	3.56945e-05	3.59156e-05	3.46567e-05	3.53464e-05	3.49037e-05	3.44251e-05	3.52792e-05	3.53483e-05	3.48741e-05	3.49939e-05	3.47283e-05	3.38854e-05	3.41534e-05	3.40803e-05	3.34459e-05	3.441e-05	3.3708e-05	3.41911e-05	3.42905e-05	3.42644e-05	3.45632e-05	3.3456e-05	3.40743e-05	3.36672e-05	3.34709e-05	3.34677e-05	3.31153e-05	3.37983e-05	3.22922e-05	3.37489e-05	3.32852e-05	3.32829e-05	3.18943e-05	3.34487e-05	3.3117e-05	3.17381e-05	3.26483e-05	3.17867e-05
	0.195	3.36306e-05	3.54335e-05	3.56512e-05	3.53339e-05	3.51575e-05	3.49333e-05	3.54036e-05	3.5148e-05	3.41996e-05	3.44323e-05	3.48113e-05	3.5022e-05	3.38056e-05	3.44751e-05	3.405e-05	3.35384e-05	3.44075e-05	3.44804e-05	3.40077e-05	3.41471e-05	3.38628e-05	3.30334e-05	3.3295e-05	3.32509e-05	3.26315e-05	3.35646e-05	3.28388e-05	3.33427e-05	3.3454e-05	3.34215e-05	3.37053e-05	3.26152e-05	3.31005e-05	3.28287e-05	3.26223e-05	3.25822e-05	3.22777e-05	3.29685e-05	3.15106e-05	3.29168e-05	3.24418e-05	3.24637e-05	3.1086e-05	3.26067e-05	3.23206e-05	3.09413e-05	3.18363e-05	3.09992e-05
	0.19	3.27725e-05	3.45406e-05	3.4752e-05	3.44333e-05	3.42654e-05	3.40462e-05	3.45065e-05	3.42617e-05	3.33362e-05	3.35594e-05	3.39309e-05	3.4141e-05	3.30167e-05	3.35974e-05	3.31765e-05	3.26973e-05	3.35534e-05	3.35801e-05	3.31567e-05	3.32705e-05	3.29976e-05	3.21823e-05	3.24637e-05	3.23906e-05	3.17987e-05	3.27173e-05	3.19868e-05	3.24945e-05	3.26031e-05	3.25964e-05	3.2852e-05	3.17959e-05	3.23701e-05	3.19961e-05	3.18033e-05	3.17902e-05	3.14501e-05	3.21115e-05	3.07104e-05	3.20534e-05	3.16429e-05	3.16598e-05	3.02789e-05	3.17676e-05	3.14946e-05	3.01602e-05	3.10313e-05	3.0183e-05
	0.185	3.19341e-05	3.36506e-05	3.38545e-05	3.35803e-05	3.33695e-05	3.31817e-05	3.36186e-05	3.3377e-05	3.24903e-05	3.26857e-05	3.30579e-05	3.3266e-05	3.21627e-05	3.27321e-05	3.23222e-05	3.18651e-05	3.2683e-05	3.2736e-05	3.23091e-05	3.24106e-05	3.21602e-05	3.13438e-05	3.16121e-05	3.15516e-05	3.09737e-05	3.18738e-05	3.11568e-05	3.16563e-05	3.17595e-05	3.17475e-05	3.20107e-05	3.09722e-05	3.15134e-05	3.11458e-05	3.09808e-05	3.09856e-05	3.06469e-05	3.12886e-05	2.99038e-05	3.12554e-05	3.08255e-05	3.08351e-05	2.9498e-05	3.09804e-05	3.06954e-05	2.94033e-05	3.02111e-05	2.94011e-05
	0.18	3.10802e-05	3.27397e-05	3.29459e-05	3.26831e-05	3.2481e-05	3.23129e-05	3.2707e-05	3.24786e-05	3.16001e-05	3.1816e-05	3.21778e-05	3.23765e-05	3.13037e-05	3.18697e-05	3.14452e-05	3.10092e-05	3.17971e-05	3.18729e-05	3.14654e-05	3.15812e-05	3.1295e-05	3.05087e-05	3.0784e-05	3.07235e-05	3.01379e-05	3.09954e-05	3.03213e-05	3.07987e-05	3.09123e-05	3.08847e-05	3.11408e-05	3.01328e-05	3.06913e-05	3.03225e-05	3.01489e-05	3.01483e-05	2.98049e-05	3.04458e-05	2.91246e-05	3.04301e-05	3.00119e-05	2.99937e-05	2.872e-05	3.01514e-05	2.98683e-05	2.8599e-05	2.94008e-05	2.86304e-05
	0.175	3.02243e-05	3.18376e-05	3.20464e-05	3.1775e-05	3.15844e-05	3.14099e-05	3.18188e-05	3.1586e-05	3.07511e-05	3.09408e-05	3.12888e-05	3.14858e-05	3.04255e-05	3.09797e-05	3.06104e-05	3.01367e-05	3.09542e-05	3.09957e-05	3.05813e-05	3.07109e-05	3.04178e-05	2.96744e-05	2.99408e-05	2.98673e-05	2.93128e-05	3.0146e-05	2.94763e-05	2.99617e-05	3.00585e-05	3.00442e-05	3.02791e-05	2.92745e-05	2.981e-05	2.94747e-05	2.93056e-05	2.93063e-05	2.89829e-05	2.96073e-05	2.83096e-05	2.95971e-05	2.91547e-05	2.91636e-05	2.79302e-05	2.93011e-05	2.90445e-05	2.78115e-05	2.85888e-05	2.78362e-05
	0.17	2.93677e-05	3.09539e-05	3.11515e-05	3.08874e-05	3.07135e-05	3.05361e-05	3.09302e-05	3.07107e-05	2.99086e-05	3.00732e-05	3.04107e-05	3.05912e-05	2.95771e-05	3.01052e-05	2.97443e-05	2.92914e-05	3.00719e-05	3.0137e-05	2.97541e-05	2.98543e-05	2.95781e-05	2.88494e-05	2.90893e-05	2.90633e-05	2.84833e-05	2.93212e-05	2.86468e-05	2.91136e-05	2.92227e-05	2.91799e-05	2.946e-05	2.84858e-05	2.89893e-05	2.86361e-05	2.84817e-05	2.8481e-05	2.81777e-05	2.87835e-05	2.75338e-05	2.87677e-05	2.83543e-05	2.83405e-05	2.71382e-05	2.84755e-05	2.82311e-05	2.70271e-05	2.77742e-05	2.7043e-05
	0.165	2.8505e-05	3.00406e-05	3.0243e-05	2.99895e-05	2.98186e-05	2.9642e-05	3.00268e-05	2.98124e-05	2.89987e-05	2.92039e-05	2.95321e-05	2.97346e-05	2.86757e-05	2.92183e-05	2.88921e-05	2.84377e-05	2.91852e-05	2.92567e-05	2.88604e-05	2.89837e-05	2.87156e-05	2.79954e-05	2.82512e-05	2.82202e-05	2.76487e-05	2.84739e-05	2.78676e-05	2.8248e-05	2.83712e-05	2.83309e-05	2.861e-05	2.76356e-05	2.8142e-05	2.78011e-05	2.76415e-05	2.76523e-05	2.73438e-05	2.79353e-05	2.67159e-05	2.79357e-05	2.75194e-05	2.74999e-05	2.63391e-05	2.76412e-05	2.73984e-05	2.62192e-05	2.69667e-05	2.62416e-05
	0.16	2.76467e-05	2.9138e-05	2.93354e-05	2.9088e-05	2.89255e-05	2.87495e-05	2.91199e-05	2.8919e-05	2.81508e-05	2.83236e-05	2.86525e-05	2.88411e-05	2.77736e-05	2.83565e-05	2.80257e-05	2.75903e-05	2.83255e-05	2.83697e-05	2.79827e-05	2.81308e-05	2.78449e-05	2.7136e-05	2.73867e-05	2.73737e-05	2.68277e-05	2.75897e-05	2.70202e-05	2.73944e-05	2.75238e-05	2.74815e-05	2.77388e-05	2.68073e-05	2.72919e-05	2.69621e-05	2.68201e-05	2.67967e-05	2.65199e-05	2.71067e-05	2.58989e-05	2.71046e-05	2.669e-05	2.66692e-05	2.55338e-05	2.68164e-05	2.65523e-05	2.54313e-05	2.61543e-05	2.54484e-05
	0.155	2.67914e-05	2.82477e-05	2.84426e-05	2.82008e-05	2.80249e-05	2.78637e-05	2.82336e-05	2.8032e-05	2.72592e-05	2.74525e-05	2.77693e-05	2.79651e-05	2.69342e-05	2.74784e-05	2.71458e-05	2.67328e-05	2.74698e-05	2.75011e-05	2.71297e-05	2.7247e-05	2.69987e-05	2.63024e-05	2.65635e-05	2.65096e-05	2.59991e-05	2.67662e-05	2.61977e-05	2.65551e-05	2.66866e-05	2.6654e-05	2.68842e-05	2.59842e-05	2.64647e-05	2.61455e-05	2.60006e-05	2.58979e-05	2.57158e-05	2.62713e-05	2.50961e-05	2.62653e-05	2.58834e-05	2.58506e-05	2.47494e-05	2.59846e-05	2.57552e-05	2.46407e-05	2.53596e-05	2.46649e-05
	0.15	2.59414e-05	2.73442e-05	2.75349e-05	2.73094e-05	2.7146e-05	2.69746e-05	2.73278e-05	2.7142e-05	2.64063e-05	2.65765e-05	2.68836e-05	2.70708e-05	2.60815e-05	2.66159e-05	2.62809e-05	2.58603e-05	2.65852e-05	2.66261e-05	2.62733e-05	2.63882e-05	2.61476e-05	2.54698e-05	2.57055e-05	2.56601e-05	2.51823e-05	2.59042e-05	2.53417e-05	2.5723e-05	2.58386e-05	2.5795e-05	2.60067e-05	2.51573e-05	2.56445e-05	2.5274e-05	2.51773e-05	2.51028e-05	2.489e-05	2.54257e-05	2.4297e-05	2.54248e-05	2.50526e-05	2.50217e-05	2.39475e-05	2.51573e-05	2.49333e-05	2.38625e-05	2.45488e-05	2.38525e-05
	0.145	2.5077e-05	2.64466e-05	2.66304e-05	2.6422e-05	2.62439e-05	2.60855e-05	2.64329e-05	2.62424e-05	2.55528e-05	2.56895e-05	2.59946e-05	2.61462e-05	2.5213e-05	2.57399e-05	2.54009e-05	2.49867e-05	2.57094e-05	2.57414e-05	2.54201e-05	2.54859e-05	2.52675e-05	2.46286e-05	2.4849e-05	2.4827e-05	2.43247e-05	2.50428e-05	2.45077e-05	2.48548e-05	2.49839e-05	2.49297e-05	2.51469e-05	2.43332e-05	2.47705e-05	2.44437e-05	2.43289e-05	2.42919e-05	2.4052e-05	2.45863e-05	2.34955e-05	2.45581e-05	2.42161e-05	2.41927e-05	2.31556e-05	2.43292e-05	2.4122e-05	2.30544e-05	2.37211e-05	2.30592e-05
	0.14	2.42268e-05	2.55596e-05	2.57178e-05	2.55055e-05	2.53541e-05	2.52068e-05	2.55401e-05	2.53526e-05	2.46503e-05	2.48264e-05	2.51191e-05	2.52672e-05	2.436e-05	2.48675e-05	2.45335e-05	2.41518e-05	2.48253e-05	2.48716e-05	2.45561e-05	2.4649e-05	2.44167e-05	2.38023e-05	2.40321e-05	2.39709e-05	2.35114e-05	2.42003e-05	2.36704e-05	2.40039e-05	2.41458e-05	2.41084e-05	2.42886e-05	2.35018e-05	2.3912e-05	2.36182e-05	2.35101e-05	2.34451e-05	2.32299e-05	2.37396e-05	2.26985e-05	2.3738e-05	2.33728e-05	2.33715e-05	2.23696e-05	2.35167e-05	2.33117e-05	2.22567e-05	2.29253e-05	2.22574e-05
	0.135	2.33481e-05	2.46396e-05	2.48097e-05	2.46097e-05	2.44524e-05	2.43097e-05	2.4612e-05	2.44593e-05	2.37848e-05	2.39466e-05	2.42325e-05	2.44018e-05	2.34921e-05	2.39798e-05	2.36612e-05	2.33029e-05	2.39627e-05	2.4007e-05	2.36884e-05	2.37833e-05	2.35442e-05	2.29601e-05	2.3172e-05	2.31068e-05	2.26737e-05	2.33458e-05	2.28143e-05	2.31519e-05	2.32836e-05	2.3241e-05	2.34228e-05	2.26634e-05	2.30751e-05	2.27509e-05	2.26927e-05	2.25879e-05	2.23993e-05	2.29073e-05	2.18933e-05	2.2883e-05	2.25524e-05	2.25336e-05	2.15759e-05	2.2667e-05	2.24578e-05	2.14561e-05	2.21041e-05	2.14881e-05
	0.13	2.25011e-05	2.3732e-05	2.38977e-05	2.37069e-05	2.35421e-05	2.34146e-05	2.37085e-05	2.35596e-05	2.29314e-05	2.30538e-05	2.33354e-05	2.34984e-05	2.25945e-05	2.31005e-05	2.27945e-05	2.24422e-05	2.30713e-05	2.31248e-05	2.28063e-05	2.29141e-05	2.26723e-05	2.20996e-05	2.23098e-05	2.22703e-05	2.18288e-05	2.24878e-05	2.19881e-05	2.2296e-05	2.24196e-05	2.23947e-05	2.25721e-05	2.18246e-05	2.22013e-05	2.19085e-05	2.18548e-05	2.17827e-05	2.15653e-05	2.20512e-05	2.10758e-05	2.20443e-05	2.17123e-05	2.16979e-05	2.07837e-05	2.18365e-05	2.16326e-05	2.06613e-05	2.12897e-05	2.06795e-05
	0.125	2.16379e-05	2.28434e-05	2.30011e-05	2.28249e-05	2.26672e-05	2.25313e-05	2.28188e-05	2.2671e-05	2.20376e-05	2.21871e-05	2.24538e-05	2.26106e-05	2.17577e-05	2.22308e-05	2.19786e-05	2.15691e-05	2.22107e-05	2.22441e-05	2.19489e-05	2.20631e-05	2.18198e-05	2.12595e-05	2.14653e-05	2.1451e-05	2.10109e-05	2.16665e-05	2.11402e-05	2.14508e-05	2.15756e-05	2.15366e-05	2.17136e-05	2.09929e-05	2.13572e-05	2.10885e-05	2.10203e-05	2.09507e-05	2.07568e-05	2.12224e-05	2.02961e-05	2.1207e-05	2.0906e-05	2.08809e-05	1.99728e-05	2.10135e-05	2.08386e-05	1.98685e-05	2.04814e-05	1.98854e-05
	0.12	2.07751e-05	2.19345e-05	2.20921e-05	2.19063e-05	2.17567e-05	2.1626e-05	2.19073e-05	2.17663e-05	2.11803e-05	2.131e-05	2.15553e-05	2.17144e-05	2.08723e-05	2.13425e-05	2.10772e-05	2.07313e-05	2.13175e-05	2.1359e-05	2.10715e-05	2.1179e-05	2.09579e-05	2.04202e-05	2.06078e-05	2.05684e-05	2.0164e-05	2.07943e-05	2.03151e-05	2.05844e-05	2.07109e-05	2.06818e-05	2.08761e-05	2.01647e-05	2.05557e-05	2.0245e-05	2.01855e-05	2.0122e-05	1.9915e-05	2.03787e-05	1.94814e-05	2.03874e-05	2.00846e-05	2.00485e-05	1.91733e-05	2.01788e-05	2.00017e-05	1.90684e-05	1.96697e-05	1.90833e-05
	0.115	1.991e-05	2.10217e-05	2.11773e-05	2.10008e-05	2.08586e-05	2.07337e-05	2.09953e-05	2.08669e-05	2.03005e-05	2.04267e-05	2.06683e-05	2.08174e-05	1.99975e-05	2.04617e-05	2.02433e-05	1.98542e-05	2.04496e-05	2.04818e-05	2.02143e-05	2.03031e-05	2.00565e-05	1.95627e-05	1.97629e-05	1.97109e-05	1.93587e-05	1.99255e-05	1.94686e-05	1.97367e-05	1.98448e-05	1.98425e-05	1.99873e-05	1.93171e-05	1.9719e-05	1.93894e-05	1.93283e-05	1.92683e-05	1.91037e-05	1.95314e-05	1.86814e-05	1.95205e-05	1.92396e-05	1.92128e-05	1.83766e-05	1.93257e-05	1.91713e-05	1.82818e-05	1.88536e-05	1.82735e-05
	0.11	1.90638e-05	2.01284e-05	2.02663e-05	2.01084e-05	1.99706e-05	1.98561e-05	2.01057e-05	1.99814e-05	1.94198e-05	1.95546e-05	1.97984e-05	1.99363e-05	1.91431e-05	1.96007e-05	1.93204e-05	1.8995e-05	1.95803e-05	1.96124e-05	1.93425e-05	1.94254e-05	1.91959e-05	1.87282e-05	1.89087e-05	1.88898e-05	1.85058e-05	1.90686e-05	1.86468e-05	1.88732e-05	1.90071e-05	1.89877e-05	1.91279e-05	1.85004e-05	1.88348e-05	1.85982e-05	1.85092e-05	1.84195e-05	1.82761e-05	1.86831e-05	1.78543e-05	1.86816e-05	1.84101e-05	1.83931e-05	1.75923e-05	1.85021e-05	1.83546e-05	1.75007e-05	1.8055e-05	1.74942e-05
	0.105	1.81947e-05	1.92083e-05	1.93536e-05	1.91948e-05	1.90755e-05	1.89512e-05	1.91918e-05	1.90736e-05	1.85539e-05	1.8667e-05	1.89163e-05	1.90291e-05	1.82734e-05	1.86999e-05	1.84453e-05	1.81654e-05	1.86945e-05	1.87256e-05	1.84654e-05	1.85625e-05	1.83192e-05	1.78746e-05	1.80544e-05	1.80157e-05	1.76671e-05	1.82035e-05	1.78024e-05	1.80159e-05	1.81444e-05	1.81211e-05	1.8267e-05	1.76588e-05	1.79734e-05	1.77446e-05	1.76772e-05	1.75936e-05	1.74486e-05	1.78311e-05	1.70614e-05	1.78368e-05	1.75721e-05	1.75576e-05	1.67858e-05	1.76576e-05	1.75175e-05	1.66997e-05	1.72166e-05	1.66952e-05
	0.1	1.73328e-05	1.83003e-05	1.84352e-05	1.82928e-05	1.81538e-05	1.8039e-05	1.82822e-05	1.81677e-05	1.76778e-05	1.77822e-05	1.80202e-05	1.81322e-05	1.74233e-05	1.78159e-05	1.75656e-05	1.72817e-05	1.78035e-05	1.78353e-05	1.7588e-05	1.768e-05	1.74485e-05	1.70331e-05	1.71996e-05	1.71638e-05	1.68229e-05	1.73326e-05	1.69418e-05	1.71491e-05	1.72896e-05	1.72533e-05	1.74011e-05	1.68172e-05	1.71425e-05	1.6866e-05	1.68292e-05	1.67641e-05	1.66085e-05	1.69831e-05	1.62434e-05	1.69878e-05	1.67191e-05	1.67183e-05	1.5989e-05	1.68258e-05	1.66866e-05	1.59193e-05	1.63998e-05	1.58946e-05
	0.095	1.6461e-05	1.73974e-05	1.75181e-05	1.73853e-05	1.72662e-05	1.71437e-05	1.73637e-05	1.72587e-05	1.68062e-05	1.69002e-05	1.71029e-05	1.72301e-05	1.6547e-05	1.69316e-05	1.66928e-05	1.6417e-05	1.69243e-05	1.69455e-05	1.67178e-05	1.68079e-05	1.6591e-05	1.61694e-05	1.63414e-05	1.63184e-05	1.59821e-05	1.6469e-05	1.6089e-05	1.62923e-05	1.64296e-05	1.63958e-05	1.6526e-05	1.59843e-05	1.62761e-05	1.60347e-05	1.59921e-05	1.59441e-05	1.57778e-05	1.6134e-05	1.54492e-05	1.61407e-05	1.59023e-05	1.58868e-05	1.51971e-05	1.5993e-05	1.58584e-05	1.51095e-05	1.55839e-05	1.51064e-05
	0.09	1.56186e-05	1.64832e-05	1.66131e-05	1.64922e-05	1.63783e-05	1.6257e-05	1.64655e-05	1.6371e-05	1.59322e-05	1.60338e-05	1.6217e-05	1.6341e-05	1.56842e-05	1.60561e-05	1.58437e-05	1.5611e-05	1.60386e-05	1.60636e-05	1.58444e-05	1.59672e-05	1.57416e-05	1.53268e-05	1.54964e-05	1.54645e-05	1.51608e-05	1.56151e-05	1.52522e-05	1.54506e-05	1.55728e-05	1.55415e-05	1.566e-05	1.51574e-05	1.54332e-05	1.52075e-05	1.51565e-05	1.51036e-05	1.49661e-05	1.52948e-05	1.46584e-05	1.53186e-05	1.50835e-05	1.5062e-05	1.44036e-05	1.51551e-05	1.50421e-05	1.43329e-05	1.47787e-05	1.42978e-05
	0.085	1.47531e-05	1.55875e-05	1.56872e-05	1.55863e-05	1.54539e-05	1.53501e-05	1.55512e-05	1.54615e-05	1.50307e-05	1.51377e-05	1.53206e-05	1.54336e-05	1.48174e-05	1.51757e-05	1.49652e-05	1.47063e-05	1.51682e-05	1.5176e-05	1.49725e-05	1.50469e-05	1.48729e-05	1.44724e-05	1.46328e-05	1.46057e-05	1.43086e-05	1.47573e-05	1.43879e-05	1.45943e-05	1.4708e-05	1.46918e-05	1.48029e-05	1.4308e-05	1.45539e-05	1.4352e-05	1.43252e-05	1.42769e-05	1.41255e-05	1.44552e-05	1.3832e-05	1.44767e-05	1.42323e-05	1.42227e-05	1.36084e-05	1.43137e-05	1.42123e-05	1.35483e-05	1.39522e-05	1.35286e-05
	0.08	1.38937e-05	1.46677e-05	1.47646e-05	1.46775e-05	1.45544e-05	1.44531e-05	1.46336e-05	1.45545e-05	1.4165e-05	1.42462e-05	1.44289e-05	1.45352e-05	1.39529e-05	1.42804e-05	1.40694e-05	1.38534e-05	1.42798e-05	1.4295e-05	1.40899e-05	1.41704e-05	1.39931e-05	1.36093e-05	1.37919e-05	1.37436e-05	1.34661e-05	1.38973e-05	1.35497e-05	1.37322e-05	1.38448e-05	1.38258e-05	1.39228e-05	1.34713e-05	1.37205e-05	1.35182e-05	1.34795e-05	1.34331e-05	1.32973e-05	1.36084e-05	1.30232e-05	1.36213e-05	1.3394e-05	1.33908e-05	1.28022e-05	1.34752e-05	1.3374e-05	1.27501e-05	1.31292e-05	1.27083e-05
	0.075	1.30326e-05	1.37702e-05	1.38613e-05	1.37541e-05	1.36564e-05	1.35643e-05	1.37447e-05	1.36572e-05	1.32684e-05	1.33676e-05	1.35389e-05	1.36257e-05	1.30859e-05	1.34048e-05	1.32164e-05	1.30086e-05	1.33958e-05	1.34231e-05	1.32304e-05	1.32883e-05	1.31455e-05	1.27702e-05	1.29347e-05	1.29057e-05	1.26241e-05	1.30323e-05	1.27184e-05	1.28903e-05	1.2996e-05	1.29828e-05	1.30732e-05	1.26419e-05	1.28678e-05	1.26651e-05	1.26406e-05	1.26035e-05	1.24717e-05	1.2769e-05	1.22251e-05	1.27784e-05	1.25669e-05	1.25619e-05	1.20174e-05	1.26532e-05	1.25559e-05	1.19667e-05	1.23173e-05	1.19292e-05
	0.07	1.2172e-05	1.28558e-05	1.29416e-05	1.28551e-05	1.27475e-05	1.26568e-05	1.28265e-05	1.27525e-05	1.23816e-05	1.24888e-05	1.26338e-05	1.27317e-05	1.22089e-05	1.25171e-05	1.23401e-05	1.21333e-05	1.25118e-05	1.25236e-05	1.23501e-05	1.24068e-05	1.22622e-05	1.19331e-05	1.20743e-05	1.20441e-05	1.17977e-05	1.21717e-05	1.18712e-05	1.20345e-05	1.2133e-05	1.21131e-05	1.22007e-05	1.18066e-05	1.20159e-05	1.18218e-05	1.18005e-05	1.17658e-05	1.16485e-05	1.19248e-05	1.13992e-05	1.19455e-05	1.17414e-05	1.17227e-05	1.12061e-05	1.18014e-05	1.17159e-05	1.11647e-05	1.14944e-05	1.11112e-05
	0.065	1.12989e-05	1.19272e-05	1.20202e-05	1.19333e-05	1.18447e-05	1.17577e-05	1.19126e-05	1.18395e-05	1.1506e-05	1.15983e-05	1.17424e-05	1.18252e-05	1.13584e-05	1.16203e-05	1.14849e-05	1.12629e-05	1.16205e-05	1.16322e-05	1.14702e-05	1.15338e-05	1.13829e-05	1.1087e-05	1.1206e-05	1.11899e-05	1.09537e-05	1.13015e-05	1.10352e-05	1.11706e-05	1.12699e-05	1.12483e-05	1.13349e-05	1.09601e-05	1.11585e-05	1.09758e-05	1.09793e-05	1.09245e-05	1.08089e-05	1.10701e-05	1.05884e-05	1.10887e-05	1.0909e-05	1.08846e-05	1.04146e-05	1.09613e-05	1.08814e-05	1.03609e-05	1.06606e-05	1.03255e-05
	0.06	1.04444e-05	1.10305e-05	1.11075e-05	1.1032e-05	1.09425e-05	1.08724e-05	1.10102e-05	1.09448e-05	1.06362e-05	1.07156e-05	1.0855e-05	1.0925e-05	1.04863e-05	1.07441e-05	1.05985e-05	1.0409e-05	1.07468e-05	1.07588e-05	1.05989e-05	1.06517e-05	1.05204e-05	1.02378e-05	1.0358e-05	1.03382e-05	1.01315e-05	1.04415e-05	1.01983e-05	1.03289e-05	1.04152e-05	1.0393e-05	1.04696e-05	1.01211e-05	1.02886e-05	1.0163e-05	1.01437e-05	1.00843e-05	9.99695e-06	1.0226e-05	9.78926e-06	1.0243e-05	1.00776e-05	1.00595e-05	9.61995e-06	1.01203e-05	1.00554e-05	9.57093e-06	9.85867e-06	9.55889e-06
	0.055	9.57876e-06	1.01148e-05	1.01829e-05	1.01147e-05	1.00388e-05	9.96894e-06	1.00942e-05	1.0037e-05	9.73812e-06	9.82346e-06	9.95295e-06	1.00149e-05	9.61843e-06	9.8432e-06	9.71052e-06	9.55414e-06	9.85198e-06	9.85313e-06	9.7225e-06	9.76702e-06	9.64978e-06	9.38684e-06	9.50219e-06	9.48107e-06	9.28569e-06	9.57657e-06	9.34337e-06	9.4622e-06	9.55412e-06	9.53634e-06	9.60695e-06	9.28129e-06	9.45603e-06	9.31006e-06	9.29307e-06	9.25185e-06	9.16215e-06	9.37912e-06	8.98065e-06	9.39014e-06	9.24502e-06	9.22383e-06	8.817e-06	9.28959e-06	9.21214e-06	8.77167e-06	9.04273e-06	8.74879e-06
	0.05	8.70776e-06	9.19652e-06	9.25799e-06	9.20047e-06	9.12082e-06	9.06616e-06	9.18461e-06	9.12769e-06	8.84747e-06	8.93252e-06	9.05009e-06	9.10742e-06	8.74476e-06	8.95402e-06	8.82462e-06	8.68601e-06	8.96504e-06	8.96635e-06	8.84359e-06	8.87815e-06	8.77854e-06	8.53194e-06	8.64132e-06	8.62084e-06	8.43956e-06	8.70943e-06	8.49223e-06	8.602e-06	8.68122e-06	8.6721e-06	8.73065e-06	8.43761e-06	8.59781e-06	8.45691e-06	8.45228e-06	8.40834e-06	8.33063e-06	8.51843e-06	8.16434e-06	8.52466e-06	8.4034e-06	8.38804e-06	8.01363e-06	8.44713e-06	8.37911e-06	7.97845e-06	8.2207e-06	7.94322e-06
	0.045	7.85104e-06	8.29096e-06	8.34595e-06	8.29125e-06	8.22571e-06	8.16469e-06	8.27852e-06	8.22768e-06	7.97914e-06	8.05195e-06	8.1508e-06	8.20758e-06	7.87809e-06	8.07073e-06	7.97636e-06	7.82984e-06	8.07201e-06	8.08018e-06	7.96746e-06	8.01438e-06	7.91468e-06	7.68831e-06	7.78626e-06	7.7658e-06	7.61143e-06	7.84836e-06	7.65603e-06	7.75321e-06	7.82522e-06	7.80958e-06	7.87019e-06	7.60799e-06	7.7483e-06	7.61928e-06	7.62078e-06	7.57996e-06	7.50584e-06	7.67711e-06	7.34919e-06	7.67829e-06	7.57806e-06	7.55438e-06	7.21835e-06	7.61069e-06	7.55597e-06	7.18987e-06	7.40971e-06	7.18639e-06
	0.04	6.9799e-06	7.37161e-06	7.42032e-06	7.37017e-06	7.31129e-06	7.26106e-06	7.36452e-06	7.3143e-06	7.09534e-06	7.16155e-06	7.24823e-06	7.30401e-06	7.00152e-06	7.17418e-06	7.06904e-06	6.96571e-06	7.18461e-06	7.18032e-06	7.08436e-06	7.1169e-06	7.03808e-06	6.83036e-06	6.91772e-06	6.90304e-06	6.76315e-06	6.97506e-06	6.81495e-06	6.88875e-06	6.95113e-06	6.94338e-06	7.00221e-06	6.76287e-06	6.89724e-06	6.77867e-06	6.77522e-06	6.73766e-06	6.66852e-06	6.83082e-06	6.5336e-06	6.82889e-06	6.73828e-06	6.72761e-06	6.42162e-06	6.7627e-06	6.7174e-06	6.39953e-06	6.58133e-06	6.38811e-06
	0.035	6.10319e-06	6.45001e-06	6.49165e-06	6.44795e-06	6.39074e-06	6.35321e-06	6.44032e-06	6.39669e-06	6.22271e-06	6.26249e-06	6.34057e-06	6.38689e-06	6.11938e-06	6.28043e-06	6.18935e-06	6.10695e-06	6.27984e-06	6.27802e-06	6.20892e-06	6.23145e-06	6.15737e-06	5.9746e-06	6.05655e-06	6.04534e-06	5.91556e-06	6.10147e-06	5.95317e-06	6.02443e-06	6.09086e-06	6.07853e-06	6.12914e-06	5.91941e-06	6.02671e-06	5.94465e-06	5.92568e-06	5.8985e-06	5.83112e-06	5.97723e-06	5.71245e-06	5.97413e-06	5.89274e-06	5.87706e-06	5.61017e-06	5.91503e-06	5.87336e-06	5.59656e-06	5.76168e-06	5.5768e-06
	0.03	5.24427e-06	5.53451e-06	5.57787e-06	5.53614e-06	5.49475e-06	5.45853e-06	5.53207e-06	5.49402e-06	5.33721e-06	5.37837e-06	5.44123e-06	5.48934e-06	5.26242e-06	5.39138e-06	5.31603e-06	5.23176e-06	5.39967e-06	5.39683e-06	5.3303e-06	5.35038e-06	5.28865e-06	5.13605e-06	5.1981e-06	5.18839e-06	5.07511e-06	5.24452e-06	5.12073e-06	5.17725e-06	5.22967e-06	5.21792e-06	5.26336e-06	5.0812e-06	5.17697e-06	5.09617e-06	5.08843e-06	5.0539e-06	5.01354e-06	5.13372e-06	4.90777e-06	5.13249e-06	5.05831e-06	5.05189e-06	4.82338e-06	5.08258e-06	5.04371e-06	4.80526e-06	4.9466e-06	4.78931e-06
	0.025	4.36774e-06	4.6151e-06	4.64911e-06	4.61769e-06	4.58117e-06	4.54674e-06	4.60687e-06	4.57995e-06	4.44184e-06	4.48003e-06	4.53715e-06	4.57524e-06	4.38661e-06	4.49588e-06	4.42566e-06	4.35873e-06	4.49676e-06	4.49991e-06	4.43843e-06	4.46121e-06	4.40377e-06	4.27458e-06	4.33206e-06	4.33002e-06	4.23016e-06	4.3653e-06	4.26605e-06	4.30877e-06	4.3572e-06	4.34634e-06	4.38667e-06	4.2347e-06	4.31086e-06	4.24043e-06	4.23269e-06	4.21576e-06	4.17408e-06	4.27231e-06	4.09566e-06	4.27828e-06	4.2192e-06	4.2077e-06	4.01748e-06	4.23862e-06	4.20149e-06	4.00663e-06	4.1227e-06	3.99193e-06
	0.02	3.49588e-06	3.69123e-06	3.71805e-06	3.69211e-06	3.66302e-06	3.6379e-06	3.68213e-06	3.66302e-06	3.55227e-06	3.58523e-06	3.63204e-06	3.65918e-06	3.50802e-06	3.59872e-06	3.54242e-06	3.48618e-06	3.59666e-06	3.60137e-06	3.54937e-06	3.56668e-06	3.52296e-06	3.41892e-06	3.46679e-06	3.45967e-06	3.38684e-06	3.49419e-06	3.40782e-06	3.44904e-06	3.48226e-06	3.47633e-06	3.5055e-06	3.38589e-06	3.44876e-06	3.39861e-06	3.38847e-06	3.37028e-06	3.34136e-06	3.41884e-06	3.27412e-06	3.41981e-06	3.37278e-06	3.3657e-06	3.21393e-06	3.38706e-06	3.36205e-06	3.20375e-06	3.29664e-06	3.18991e-06
	0.015	2.63337e-06	2.78145e-06	2.80016e-06	2.78116e-06	2.75758e-06	2.73878e-06	2.77564e-06	2.75995e-06	2.67599e-06	2.7011e-06	2.73077e-06	2.75447e-06	2.64692e-06	2.70896e-06	2.66668e-06	2.62389e-06	2.70799e-06	2.70977e-06	2.67061e-06	2.68914e-06	2.65237e-06	2.57671e-06	2.61223e-06	2.60547e-06	2.54979e-06	2.63194e-06	2.5665e-06	2.59768e-06	2.62322e-06	2.61512e-06	2.64021e-06	2.55094e-06	2.59546e-06	2.55976e-06	2.55179e-06	2.53608e-06	2.51726e-06	2.57293e-06	2.46442e-06	2.57703e-06	2.54032e-06	2.53725e-06	2.41976e-06	2.55283e-06	2.5303e-06	2.41083e-06	2.48549e-06	2.40858e-06
	0.01	1.75618e-06	1.85338e-06	1.86718e-06	1.85582e-06	1.84067e-06	1.82729e-06	1.85156e-06	1.83976e-06	1.789e-06	1.80158e-06	1.82234e-06	1.83899e-06	1.76202e-06	1.80719e-06	1.78117e-06	1.75039e-06	1.80615e-06	1.80855e-06	1.7818e-06	1.79453e-06	1.77077e-06	1.72001e-06	1.74154e-06	1.73777e-06	1.70242e-06	1.75538e-06	1.71317e-06	1.73391e-06	1.75223e-06	1.74634e-06	1.76155e-06	1.70132e-06	1.73272e-06	1.70749e-06	1.70276e-06	1.69057e-06	1.6798e-06	1.71776e-06	1.64307e-06	1.72092e-06	1.6952e-06	1.69144e-06	1.61456e-06	1.70094e-06	1.68883e-06	1.60973e-06	1.65833e-06	1.60258e-06
	0.005	8.79501e-07	9.28534e-07	9.34187e-07	9.29138e-07	9.21084e-07	9.14989e-07	9.27224e-07	9.2092e-07	8.94775e-07	9.01149e-07	9.13101e-07	9.20184e-07	8.84634e-07	9.0549e-07	8.91362e-07	8.76237e-07	9.04925e-07	9.06054e-07	8.91032e-07	8.98287e-07	8.8662e-07	8.6115e-07	8.72914e-07	8.69643e-07	8.51887e-07	8.78913e-07	8.56937e-07	8.66945e-07	8.77329e-07	8.74519e-07	8.82379e-07	8.51293e-07	8.67121e-07	8.55386e-07	8.52374e-07	8.47729e-07	8.41075e-07	8.59473e-07	8.23099e-07	8.62624e-07	8.49429e-07	8.46013e-07	8.08081e-07	8.52022e-07	8.45454e-07	8.0523e-07	8.29994e-07	8.05426e-07
	0	5.974e-09	5.9e-09	6.307e-09	6.907e-09	6.366e-09	5.815e-09	6.425e-09	5.56e-09	5.069e-09	6.139e-09	5.838e-09	6.382e-09	5.999e-09	6.992e-09	6.425e-09	5.406e-09	5.99e-09	6.086e-09	5.905e-09	6.867e-09	6.021e-09	5.846e-09	6.494e-09	5.767e-09	5.367e-09	5.354e-09	5.291e-09	5.082e-09	5.533e-09	5.479e-09	5.444e-09	4.952e-09	5.338e-09	5.137e-09	5.766e-09	5.664e-09	5.615e-09	4.818e-09	4.807e-09	5.189e-09	5.804e-09	5.536e-09	4.597e-09	5.264e-09	5.458e-09	3.723e-09	4.768e-09	4.319e-09
[truncated: 54 more columns]

## Sheet: 2c
pulse num	cond	pulse num	cond	pulse num	cond	pulse num	cond	pulse num	cond	pulse num	cond	pulse num	cond	pulse num	cond
1	5.09074e-05	101	0.000329427	201	5.57499e-05	301	0.00033034	401	5.12742e-05	501	0.000330011	601	5.6496e-05	701	0.000322359
2	6.14442e-05	102	0.000330297	202	6.73401e-05	302	0.000328628	402	5.12968e-05	502	0.000326947	602	5.62755e-05	702	0.000320655
3	6.52465e-05	103	0.000325658	203	7.00794e-05	303	0.000324849	403	5.12019e-05	503	0.000326557	603	5.61624e-05	703	0.000316501
4	5.96006e-05	104	0.000324586	204	6.84575e-05	304	0.000320875	404	5.05e-05	504	0.000322986	604	5.61502e-05	704	0.000313215
5	6.32825e-05	105	0.000322626	205	6.82267e-05	305	0.000317009	405	7.46247e-05	505	0.000313641	605	5.80074e-05	705	0.000302672
6	6.18997e-05	106	0.000320781	206	9.79499e-05	306	0.000309706	406	8.48706e-05	506	0.000305898	606	5.81568e-05	706	0.000301384
7	5.54872e-05	107	0.000317045	207	0.00010823	307	0.000304588	407	4.50297e-05	507	0.000304418	607	5.92326e-05	707	0.000295574
8	5.06168e-05	108	0.000312149	208	9.46761e-05	308	0.000302355	408	4.51053e-05	508	0.000292903	608	5.60084e-05	708	0.000288865
9	5.28047e-05	109	0.000303281	209	7.90472e-05	309	0.000291364	409	5.07798e-05	509	0.000277209	609	0.000113446	709	0.000275054
10	6.20925e-05	110	0.000304167	210	9.33532e-05	310	0.000291756	410	5.07205e-05	510	0.000266013	610	0.000113574	710	0.000286794
11	6.53385e-05	111	0.000303279	211	8.37285e-05	311	0.000295179	411	5.57638e-05	511	0.000249001	611	0.00011333	711	0.000272355
12	9.42939e-05	112	0.000300633	212	0.00010593	312	0.0002941	412	8.30748e-05	512	0.000261929	612	9.82089e-05	712	0.000257561
13	7.90688e-05	113	0.00030264	213	0.000126127	313	0.00028372	413	9.93967e-05	513	0.000250404	613	8.11848e-05	713	0.000254063
14	7.79397e-05	114	0.000298185	214	0.000118702	314	0.000268477	414	7.71247e-05	514	0.000227433	614	9.46667e-05	714	0.000228372
15	9.77009e-05	115	0.000284729	215	0.0001117	315	0.000265801	415	8.21364e-05	515	0.000221879	615	9.16833e-05	715	0.000189686
16	9.86802e-05	116	0.000276156	216	0.000121801	316	0.000253357	416	7.14669e-05	516	0.000210889	616	9.19684e-05	716	0.00020596
17	9.50207e-05	117	0.000260128	217	0.000116307	317	0.000253878	417	6.94613e-05	517	0.000201723	617	9.28389e-05	717	0.000193203
18	8.25619e-05	118	0.000244928	218	0.000128488	318	0.000232594	418	6.94017e-05	518	0.000190229	618	8.51808e-05	718	0.000206359
19	9.49393e-05	119	0.000231915	219	0.000128337	319	0.000232346	419	7.02654e-05	519	0.000199097	619	0.000106386	719	0.000201422
20	7.97196e-05	120	0.000234595	220	0.000118494	320	0.000241347	420	6.76865e-05	520	0.000163544	620	8.96175e-05	720	0.000181547
21	6.60868e-05	121	0.000227092	221	0.000118666	321	0.000206602	421	7.43818e-05	521	0.00019923	621	0.000103432	721	0.000197203
22	6.98409e-05	122	0.000225088	222	0.000107539	322	0.000192827	422	7.12674e-05	522	0.000178594	622	9.98376e-05	722	0.000168426
23	7.51676e-05	123	0.000204592	223	0.000143911	323	0.000179978	423	7.42157e-05	523	0.00017156	623	9.4846e-05	723	0.000172639
24	7.69037e-05	124	0.000219797	224	0.000159529	324	0.000182694	424	6.73097e-05	524	0.000172554	624	0.000105831	724	0.000166729
25	6.67956e-05	125	0.000208891	225	0.000155113	325	0.000178129	425	6.96665e-05	525	0.000160458	625	0.000107475	725	0.000174504
26	0.000113876	126	0.000223457	226	0.000150549	326	0.000181283	426	7.5274e-05	526	0.000163842	626	9.99133e-05	726	0.000188225
27	8.54449e-05	127	0.00019966	227	0.000158727	327	0.000159718	427	9.93202e-05	527	0.000154573	627	0.00010386	727	0.000167073
28	0.000101371	128	0.000206366	228	0.000150415	328	0.000160444	428	0.0001004	528	0.000147499	628	0.000107334	728	0.000179134
29	0.000115454	129	0.000206516	229	0.000162843	329	0.000124787	429	8.27731e-05	529	0.000149498	629	0.000104246	729	0.000149541
30	0.000120053	130	0.000209625	230	0.000157459	330	0.000131771	430	0.000125815	530	0.000154353	630	0.000112929	730	0.000167192
31	0.000123618	131	0.000179435	231	0.000157891	331	0.000133051	431	0.000105663	531	0.000169606	631	0.000108266	731	0.00017644
32	0.000119534	132	0.00019122	232	0.000167347	332	0.000130222	432	0.000114903	532	0.000156601	632	0.00010249	732	0.000156677
33	0.0001366	133	0.000198601	233	0.000181336	333	0.00013666	433	0.000112838	533	0.000145778	633	0.000127129	733	0.000165426
34	0.000160491	134	0.000194785	234	0.000180271	334	0.000115177	434	0.000115085	534	0.000135407	634	0.000142341	734	0.000145146
35	0.000153527	135	0.000190564	235	0.000185154	335	0.000138726	435	0.000114522	535	0.000146577	635	0.000123834	735	0.000173755
36	0.000145002	136	0.000168817	236	0.000172716	336	0.000133388	436	0.000105142	536	0.000127542	636	0.000122359	736	0.000129427
37	0.000152309	137	0.000164977	237	0.000158399	337	0.000120255	437	0.000125769	537	0.000127374	637	0.000121799	737	0.000135188
38	0.00015567	138	0.000168929	238	0.000185129	338	0.000114945	438	0.000140455	538	0.000115715	638	0.000118843	738	0.000120297
39	0.000158566	139	0.000171579	239	0.000175807	339	9.66113e-05	439	0.000126244	539	0.000143831	639	0.0001207	739	0.000140526
40	0.000164218	140	0.00014057	240	0.000167389	340	0.000134616	440	0.000134475	540	0.000121444	640	0.000165122	740	0.000132332
41	0.000162271	141	0.000154803	241	0.000188627	341	0.000125322	441	0.000118245	541	0.000101869	641	0.000157497	741	0.000153638
42	0.000148467	142	0.00014969	242	0.000151563	342	0.000115635	442	0.000132356	542	0.000105132	642	0.000157038	742	0.000128842
43	0.000155122	143	0.000174172	243	0.0001508	343	0.000128876	443	0.000147141	543	0.000117709	643	0.00014852	743	0.000143589
44	0.000161171	144	0.000153093	244	0.000153908	344	0.000143046	444	0.00012941	544	0.000125491	644	0.000169485	744	0.000126316
45	0.000160189	145	0.000141651	245	0.000154644	345	0.000127934	445	0.000166717	545	0.000130472	645	0.000172143	745	0.000111547
46	0.000173508	146	0.000136083	246	0.000135206	346	0.000143354	446	0.000147319	546	0.00014079	646	0.000166514	746	0.00012801
47	0.000169771	147	0.000135995	247	0.000141258	347	0.000137809	447	0.000152816	547	0.000115053	647	0.000170738	747	0.000131616
48	0.000166209	148	0.000149867	248	0.000181465	348	0.000109606	448	0.000153187	548	0.000125329	648	0.000182451	748	0.000140813
49	0.000166994	149	0.000131642	249	0.000166235	349	0.000134421	449	0.000166268	549	0.000122155	649	0.000186252	749	0.000132781
50	0.000167992	150	0.000153344	250	0.000180598	350	0.000138794	450	0.000184095	550	0.000113573	650	0.000200112	750	0.000123466
51	0.000163828	151	0.000117499	251	0.000181722	351	0.000127162	451	0.000155879	551	0.000109307	651	0.000193208	751	0.000135532
52	0.000174957	152	0.000122476	252	0.000188629	352	0.000124257	452	0.000133287	552	0.000112471	652	0.000186469	752	0.000111673
53	0.000185901	153	0.000114669	253	0.00018186	353	0.000124009	453	0.000163495	553	0.000106734	653	0.000186655	753	9.79596e-05
54	0.00019056	154	0.000106694	254	0.000186531	354	0.000124756	454	0.000163676	554	9.7439e-05	654	0.0001803	754	0.000127867
55	0.000193832	155	0.000114099	255	0.000183974	355	0.000110207	455	0.000168449	555	0.000100305	655	0.000185983	755	0.00012269
56	0.000191587	156	0.000129102	256	0.000182315	356	0.000109095	456	0.000175213	556	8.78884e-05	656	0.000182951	756	0.000124729
57	0.000186231	157	0.000124019	257	0.000192384	357	0.000114914	457	0.000155065	557	9.30764e-05	657	0.000174377	757	0.000127342
58	0.000203178	158	0.000138838	258	0.000171167	358	9.24962e-05	458	0.000150075	558	0.000115454	658	0.000174088	758	0.0001263
59	0.000194246	159	0.000133932	259	0.000188843	359	8.78512e-05	459	0.000154837	559	0.000111246	659	0.000190596	759	0.00013364
60	0.000192204	160	0.000140757	260	0.000191574	360	0.000104362	460	0.000162803	560	0.000116744	660	0.000181426	760	0.00012176
61	0.000206243	161	0.000119432	261	0.000215136	361	8.85185e-05	461	0.000147777	561	9.09929e-05	661	0.000204986	761	0.000134518
62	0.000215614	162	0.000121397	262	0.000207838	362	0.000101005	462	0.000158584	562	0.000112371	662	0.000200247	762	0.000122064
63	0.000218159	163	0.000109065	263	0.000195735	363	0.000103062	463	0.0001576	563	0.00010726	663	0.000199769	763	0.000113262
64	0.000216558	164	0.000117043	264	0.000200872	364	9.15366e-05	464	0.000153975	564	0.000100609	664	0.000200495	764	8.73554e-05
65	0.000213337	165	0.000128375	265	0.000227448	365	6.57556e-05	465	0.000196879	565	0.000115066	665	0.000205637	765	0.000131283
66	0.000225351	166	0.000124388	266	0.000236726	366	9.84992e-05	466	0.000208151	566	0.000113446	666	0.000219821	766	0.000118371
67	0.00023111	167	0.000108902	267	0.00023202	367	9.00955e-05	467	0.000190548	567	7.75623e-05	667	0.000219355	767	0.000100882
68	0.000219063	168	9.08757e-05	268	0.000242269	368	7.57478e-05	468	0.000173218	568	9.97366e-05	668	0.000226836	768	0.000100053
69	0.000232119	169	9.58597e-05	269	0.000247769	369	8.04759e-05	469	0.000191844	569	9.2746e-05	669	0.000220959	769	0.000106839
70	0.000228447	170	9.32948e-05	270	0.00023367	370	0.000107052	470	0.000187393	570	9.85695e-05	670	0.000238219	770	7.69697e-05
71	0.000237503	171	8.86752e-05	271	0.000248802	371	8.04803e-05	471	0.000186146	571	0.000101911	671	0.000239921	771	8.27084e-05
72	0.000239915	172	0.000101599	272	0.00025688	372	0.000102245	472	0.00022809	572	0.00011056	672	0.000237608	772	9.69946e-05
73	0.000239033	173	0.000101084	273	0.000273016	373	7.16481e-05	473	0.000238948	573	8.87482e-05	673	0.000236358	773	0.00011126
74	0.000256789	174	0.000105334	274	0.000282506	374	9.91703e-05	474	0.000237636	574	0.000101981	674	0.000251846	774	7.03933e-05
75	0.000270659	175	0.000110419	275	0.000282506	375	9.15858e-05	475	0.000238055	575	9.31537e-05	675	0.000262548	775	9.67919e-05
76	0.000266186	176	0.000123668	276	0.000287086	376	6.48098e-05	476	0.000247282	576	0.000101651	676	0.000271808	776	7.92114e-05
77	0.000269668	177	0.00010261	277	0.000288527	377	9.00429e-05	477	0.000245557	577	0.000112621	677	0.000276934	777	8.15672e-05
78	0.000277426	178	8.02697e-05	278	0.000280679	378	7.86032e-05	478	0.00025273	578	0.000125656	678	0.000277249	778	7.80194e-05
79	0.000287474	179	0.000114278	279	0.000289989	379	7.26887e-05	479	0.000260548	579	0.000113047	679	0.00028248	779	9.49733e-05
80	0.000295812	180	0.000101375	280	0.00029343	380	8.02143e-05	480	0.000254007	580	9.04268e-05	680	0.000290739	780	9.74454e-05
81	0.000298709	181	0.000113876	281	0.000302852	381	8.13962e-05	481	0.000269339	581	8.33807e-05	681	0.000293573	781	8.61373e-05
82	0.000309143	182	9.09637e-05	282	0.000303894	382	6.07701e-05	482	0.000268524	582	8.67063e-05	682	0.000294114	782	7.44872e-05
83	0.000308641	183	7.67991e-05	283	0.000305044	383	7.84107e-05	483	0.00027715	583	7.56243e-05	683	0.00029502	783	0.000105727
84	0.000314565	184	9.30034e-05	284	0.000305541	384	9.96747e-05	484	0.00027458	584	8.04382e-05	684	0.000291286	784	8.88631e-05
85	0.000315256	185	8.11415e-05	285	0.000307363	385	6.39886e-05	485	0.000286589	585	9.69846e-05	685	0.000295427	785	6.37419e-05
86	0.000316841	186	0.000100039	286	0.000308062	386	6.09585e-05	486	0.000290154	586	8.16847e-05	686	0.000294698	786	9.5904e-05
87	0.000317847	187	0.000104677	287	0.000308924	387	5.77326e-05	487	0.000290218	587	7.30594e-05	687	0.000294571	787	8.86214e-05
88	0.000318001	188	8.78465e-05	288	0.00031248	388	6.37625e-05	488	0.000291192	588	7.19066e-05	688	0.000295037	788	8.94468e-05
89	0.000316981	189	9.13563e-05	289	0.000320143	389	6.25316e-05	489	0.000292179	589	9.05015e-05	689	0.000306773	789	8.67978e-05
90	0.00031934	190	9.50602e-05	290	0.000320953	390	7.81316e-05	490	0.000299545	590	5.31399e-05	690	0.000303148	790	7.66317e-05
91	0.000322909	191	6.98239e-05	291	0.00032117	391	6.97137e-05	491	0.000306443	591	5.31654e-05	691	0.000310143	791	7.94993e-05
92	0.000325091	192	8.87127e-05	292	0.000325667	392	8.41408e-05	492	0.000310937	592	5.71177e-05	692	0.000310197	792	9.87265e-05
93	0.00032639	193	8.79795e-05	293	0.000323674	393	7.40197e-05	493	0.000312576	593	5.57805e-05	693	0.00031111	793	8.82112e-05
94	0.000329251	194	7.69973e-05	294	0.000326614	394	6.80315e-05	494	0.000312237	594	5.5779e-05	694	0.000307455	794	0.000104006
95	0.000330679	195	7.33556e-05	295	0.000325608	395	7.82057e-05	495	0.000311829	595	6.35246e-05	695	0.000313068	795	6.06102e-05
96	0.000327415	196	7.98493e-05	296	0.000329444	396	4.83509e-05	496	0.000319128	596	5.22419e-05	696	0.000319792	796	6.7818e-05
97	0.000333075	197	5.45722e-05	297	0.000333108	397	6.57634e-05	497	0.000320067	597	5.05127e-05	697	0.000319588	797	6.48549e-05
98	0.000331502	198	6.57002e-05	298	0.000336363	398	6.53584e-05	498	0.000321605	598	5.05636e-05	698	0.000319132	798	5.99883e-05
99	0.000335137	199	6.62714e-05	299	0.000337177	399	8.72576e-05	499	0.000320667	599	4.88236e-05	699	0.000319874	799	8.31413e-05
100	0.000336676	200	7.18664e-05	300	0.000337066	400	7.94979e-05	500	0.000325867	600	4.84216e-05	700	0.000326555	800	8.31872e-05

## Sheet: 2e
Vg=1.21V	Time	Voltage	Voltage	Voltage	Voltage	Voltage	Voltage	Voltage	Voltage	Voltage	Voltage	Voltage	Voltage	Voltage	Voltage	Voltage	Voltage	Voltage	Voltage	Voltage	Voltage	Voltage	Voltage	Voltage	Voltage	Voltage	Voltage	Voltage	Voltage	Voltage	Voltage	Voltage	Voltage	Voltage	Voltage	Voltage	Voltage	Voltage	Voltage	Voltage	Voltage	Voltage	Voltage	Voltage	Voltage	Voltage	Voltage	Voltage	Voltage
Cycles		1	2	3	4	5	6	7	8	9	10	11	12	13	14	15	16	17	18	19	20	21	22	23	24	25	26	27	28	29	30	31	32	33	34	35	36	37	38	39	40	41	42	43	44	45	46	47	48
	0	0.0016	-0.00134	-0.00429	0.000129083	-0.00429	0.00455	-0.00134	0.000129083	0.00308	0.000129083	-0.00429	-0.00282	-0.00429	-0.00282	-0.00282	-0.00134	0.0075	0.00308	0.00455	-0.00724	-0.00724	0.00308	-0.00134	0.0016	-0.00577	-0.00282	-0.00282	-0.00134	-0.00429	0.0016	0.0016	0.00455	0.0075	-0.00577	-0.00134	0.0016	-0.00429	0.00308	0.0016	-0.00282	-0.00134	0.0075	-0.00429	-0.00282	0.00897	0.000129083	0.0016	0.0016
	5e-09	0.00308	-0.00429	-0.00429	0.00308	-0.00134	0.000129083	-0.00134	0.0016	0.0016	-0.00282	0.000129083	-0.00134	-0.00134	-0.00871	0.00455	-0.00282	-0.00134	-0.00282	0.000129083	-0.00429	0.00455	-0.00429	0.0016	0.00455	0.00602	0.00308	0.0016	-0.00282	-0.00724	-0.00724	-0.00724	0.000129083	0.00602	0.0016	-0.00429	0.0016	-0.00871	-0.00134	0.000129083	0.00455	-0.00724	0.000129083	0.0075	-0.01019	0.0016	0.00308	0.00308	-0.01019
	1e-08	-0.00134	-0.00429	0.0016	0.00308	0.00455	-0.00134	0.0075	-0.00282	-0.00282	-0.00577	0.000129083	-0.00134	-0.00134	-0.00577	-0.00134	0.000129083	-0.00577	-0.00134	0.000129083	0.0016	-0.00282	-0.00429	0.00455	-0.00429	0.00602	0.0016	0.000129083	0.00308	0.0016	-0.00134	-0.00134	0.000129083	-0.00724	0.0016	-0.00282	-0.00724	0.00897	0.000129083	-0.00429	-0.00577	0.0016	-0.00577	0.000129083	-0.00134	-0.00724	0.0016	0.0016	0.0016
	1.5e-08	0.000129083	-0.00134	0.000129083	-0.00724	0.0016	0.0016	0.000129083	0.000129083	-0.00429	0.0016	-0.00429	-0.00134	-0.01313	0.00602	-0.00724	0.0016	-0.00724	-0.00134	-0.00282	0.0016	-0.00282	-0.00282	0.0016	-0.00429	-0.00724	-0.00134	-0.00429	-0.00134	0.00455	0.0016	0.00602	0.0016	-0.00134	-0.00282	-0.00724	-0.00724	-0.00282	-0.00134	0.000129083	-0.00282	0.0016	0.00455	-0.01019	0.00455	0.00455	-0.00871	-0.00577	0.00455
	2e-08	-0.00282	-0.00577	-0.00134	-0.00282	-0.00282	-0.00134	-0.00429	0.00602	0.00308	-0.00871	0.00602	-0.01019	0.01339	-0.00134	-0.00134	-0.00577	0.00308	-0.00134	-0.00282	-0.00134	-0.00429	-0.00134	-0.00134	-0.00134	0.00455	-0.00282	0.00455	-0.00134	-0.00429	0.00308	-0.01166	0.000129083	-0.00282	-0.00577	-0.00282	0.000129083	-0.00724	-0.00577	0.0016	0.00455	0.0016	0.00897	-0.00577	-0.00282	0.00602	0.000129083	-0.00429	-0.00429
	2.5e-08	-0.00429	-0.00429	-0.00577	0.00308	-0.00724	-0.00724	0.000129083	-0.00724	0.000129083	-0.00429	-0.00871	0.0016	-0.00282	-0.01019	0.000129083	-0.00282	0.00455	0.0016	-0.00282	-0.00134	-0.01313	0.00308	-0.00429	0.00308	0.00308	-0.00282	-0.00577	-0.00871	-0.00429	-0.01166	-0.00577	0.00308	-0.00429	-0.00282	0.00455	-0.00429	-0.00282	0.0016	0.0016	-0.00577	-0.00871	-0.00134	0.00602	-0.00282	-0.00282	0.00308	0.00308	-0.00282
	3e-08	0.00602	0.0016	-0.00577	0.000129083	0.0016	-0.00871	0.00455	0.000129083	-0.00871	0.00602	-0.00577	0.0016	-0.01019	-0.00134	-0.00282	-0.00282	-0.01019	-0.00429	-0.00429	-0.00282	-0.00282	-0.00577	-0.00282	-0.00282	-0.00282	-0.00134	-0.00577	-0.00134	-0.00282	-0.00429	0.0016	-0.00134	-0.00134	-0.00134	0.000129083	-0.00871	0.00455	0.00308	-0.00429	-0.00429	-0.00134	-0.01019	-0.00429	-0.00724	-0.00577	-0.00429	-0.00134	-0.00134
	3.5e-08	-0.00871	-0.00429	-0.00429	-0.00429	-0.00577	0.0075	-0.00134	0.00455	0.000129083	-0.00282	0.00455	-0.00577	-0.00429	-0.00282	-0.00577	-0.00134	-0.00282	-0.00724	-0.00871	-0.00577	0.0075	-0.00871	0.00455	-0.01166	0.0016	0.000129083	-0.00577	0.00602	-0.00577	0.00308	-0.00282	-0.00871	-0.00282	0.00308	-0.01019	-0.00429	-0.00282	-0.01019	-0.01461	-0.00282	0.00308	-0.00134	-0.00429	-0.00577	0.000129083	-0.00429	-0.00871	0.000129083
	4e-08	-0.01313	-0.01019	-0.00429	-0.00577	-0.00429	-0.00429	-0.00577	-0.00577	-0.00724	-0.00871	0.0016	-0.01166	0.00308	-0.00282	-0.00282	-0.00134	-0.00134	0.0016	0.0075	-0.00429	-0.00871	-0.00134	-0.01019	-0.00282	0.0016	-0.01019	-0.00134	-0.00282	-0.00282	0.000129083	-0.00871	0.00308	-0.00134	-0.01461	-0.00282	-0.01166	-0.00282	-0.00577	0.0016	0.000129083	-0.00429	0.00897	0.000129083	-0.00282	0.00455	0.000129083	0.0016	-0.00871
	4.5e-08	0.00308	-0.00724	-0.00134	0.00308	-0.00429	-0.00871	0.00602	-0.00282	-0.00282	-0.00577	-0.01019	-0.00134	-0.00134	-0.00134	-0.00134	-0.00577	-0.00282	0.000129083	-0.00134	-0.00724	-0.01166	-0.00429	0.0016	0.0075	-0.00134	-0.00871	-0.00282	-0.00871	0.000129083	-0.00724	-0.00429	0.000129083	-0.00871	-0.00429	0.0016	-0.00134	-0.00429	0.00602	0.00308	-0.00429	-0.00429	0.000129083	-0.00577	-0.00429	-0.00134	-0.00282	0.00308	-0.00282
	5e-08	0.00308	0.00455	-0.00134	0.00602	0.00602	0.000129083	0.00602	0.000129083	0.00308	0.01192	0.00455	0.00602	0.0016	-0.00429	-0.00134	-0.00577	0.00602	-0.00429	-0.00429	0.00455	0.00897	-0.00282	0.0075	-0.00134	0.00897	0.01339	0.00308	0.0075	0.0016	0.0016	0.00602	-0.00134	0.0016	0.00455	0.00308	-0.00134	0.00308	0.0016	-0.00134	0.0016	0.00308	-0.00134	-0.00134	-0.00134	0.0016	0.00308	-0.00429	-0.00429
	5.5e-08	0.00897	0.01486	0.01339	0.00897	0.01339	0.01339	0.01044	0.01486	0.0075	0.01192	0.02223	0.00455	0.01192	0.00897	0.01044	0.02076	0.00897	0.00897	0.01339	0.02076	0.01192	0.00897	0.00602	0.00455	0.01781	0.01339	-0.00134	0.01044	0.01192	0.01634	0.00897	0.01192	0.00602	0.00897	0.00897	0.00897	0.01634	0.01044	0.00455	0.01339	0.01634	0.01192	0.01044	0.01634	0.01486	0.00897	0.01192	0.01192
	6e-08	0.0296	0.02518	0.02813	0.02371	0.02076	0.02665	0.0296	0.02371	0.02223	0.02518	0.01634	0.02223	0.02665	0.0296	0.02371	0.02665	0.02371	0.0296	0.03255	0.01339	0.02223	0.02371	0.01929	0.03107	0.01634	0.01339	0.0296	0.01929	0.02371	0.02371	0.02665	0.02813	0.02665	0.01634	0.02665	0.02518	0.02371	0.0296	0.03255	0.02371	0.02518	0.03107	0.02223	0.01929	0.02665	0.01929	0.03255	0.02665
	6.5e-08	0.04139	0.03402	0.03255	0.04286	0.03844	0.03844	0.03255	0.04139	0.04728	0.03697	0.04581	0.03991	0.04434	0.03697	0.03991	0.03402	0.04434	0.04286	0.04286	0.04581	0.03549	0.04286	0.04286	0.04139	0.05023	0.04286	0.04876	0.04139	0.03844	0.03991	0.04581	0.04286	0.03991	0.04139	0.04286	0.04139	0.04581	0.03991	0.03697	0.04434	0.04139	0.04581	0.03844	0.03991	0.04286	0.04581	0.04728	0.03991
	7e-08	0.06644	0.07086	0.06496	0.07086	0.07086	0.06791	0.06496	0.06496	0.06349	0.06644	0.06791	0.06496	0.06054	0.06054	0.06939	0.06054	0.06644	0.06791	0.06644	0.06644	0.06496	0.05907	0.06939	0.06349	0.07086	0.07528	0.0576	0.06791	0.06791	0.06349	0.06054	0.07086	0.06791	0.06496	0.06496	0.06349	0.06644	0.06644	0.06202	0.05465	0.06349	0.06349	0.07381	0.06054	0.06939	0.06644	0.06496	0.06054
	7.5e-08	0.09002	0.09738	0.09149	0.09591	0.09591	0.09149	0.09738	0.09296	0.0797	0.09444	0.08265	0.08265	0.08707	0.09296	0.08412	0.09296	0.0797	0.09149	0.08707	0.09149	0.08854	0.08707	0.08265	0.08707	0.09002	0.08559	0.08707	0.08707	0.09149	0.09738	0.09444	0.08412	0.0797	0.08265	0.08854	0.08117	0.09002	0.09296	0.08412	0.09149	0.09149	0.09296	0.08265	0.09591	0.08854	0.08117	0.08412	0.09886
	8e-08	0.1077	0.11359	0.11654	0.10917	0.11064	0.11359	0.11212	0.12243	0.11949	0.10917	0.11507	0.11507	0.11507	0.11507	0.11359	0.11212	0.12096	0.11801	0.11801	0.11507	0.11801	0.11654	0.11359	0.11654	0.11507	0.10917	0.12243	0.11212	0.11507	0.10917	0.11801	0.11212	0.1077	0.11359	0.11801	0.11949	0.1077	0.1077	0.10917	0.11801	0.11507	0.11507	0.10622	0.11212	0.11654	0.11359	0.12096	0.11949
	8.5e-08	0.14306	0.14306	0.14012	0.14601	0.13864	0.14896	0.13275	0.14012	0.14896	0.14306	0.14306	0.14306	0.14159	0.13864	0.15043	0.14748	0.14748	0.14601	0.14896	0.14159	0.14159	0.14601	0.14012	0.14306	0.14012	0.14601	0.14306	0.14012	0.14159	0.14159	0.14306	0.15632	0.15338	0.14159	0.14896	0.14748	0.14159	0.14601	0.15043	0.14159	0.13864	0.14748	0.14601	0.14748	0.14601	0.15485	0.14454	0.13569
	9e-08	0.18137	0.17695	0.17106	0.17401	0.1799	0.17401	0.17695	0.16517	0.17401	0.1799	0.16664	0.17253	0.17695	0.1799	0.17695	0.17843	0.17843	0.17106	0.17695	0.17401	0.17253	0.17548	0.17843	0.17548	0.18285	0.17695	0.17106	0.17401	0.17401	0.17106	0.17106	0.17843	0.17253	0.17548	0.17695	0.17253	0.18137	0.17548	0.16959	0.16959	0.17843	0.17253	0.17843	0.16074	0.16959	0.17253	0.17253	0.17401
	9.5e-08	0.20642	0.20495	0.21085	0.202	0.20937	0.20053	0.21085	0.21821	0.20495	0.20642	0.20937	0.2079	0.20053	0.2079	0.20348	0.20495	0.20495	0.19611	0.20348	0.202	0.21085	0.19611	0.20937	0.202	0.202	0.20642	0.20642	0.2079	0.21085	0.21232	0.21232	0.19758	0.19758	0.20495	0.20348	0.20642	0.21085	0.20348	0.19758	0.20642	0.2079	0.20642	0.19906	0.21232	0.20642	0.20495	0.202	0.20642
	1e-07	0.23147	0.23884	0.23884	0.23147	0.23737	0.24179	0.23295	0.24474	0.23295	0.23	0.24032	0.23	0.24326	0.2359	0.23884	0.24032	0.23884	0.25505	0.24326	0.24179	0.24032	0.24474	0.23737	0.24326	0.23884	0.2359	0.23884	0.23442	0.24326	0.24179	0.24032	0.24032	0.23884	0.2359	0.24474	0.24032	0.2359	0.23442	0.24621	0.24326	0.23884	0.24326	0.23295	0.24621	0.24032	0.24326	0.24032	0.24179
	1.05e-07	0.27273	0.27568	0.26242	0.27863	0.26537	0.27126	0.26537	0.26389	0.27421	0.27421	0.26831	0.26684	0.28158	0.26684	0.27568	0.26831	0.27273	0.27273	0.27568	0.26389	0.26979	0.27421	0.26095	0.27715	0.27715	0.26684	0.26979	0.25947	0.26537	0.26831	0.26537	0.27568	0.27568	0.27126	0.27421	0.26684	0.26831	0.27421	0.27715	0.26242	0.26684	0.27273	0.27863	0.25652	0.27568	0.26831	0.27126	0.26979
	1.1e-07	0.3081	0.30368	0.30515	0.3081	0.30515	0.29778	0.31399	0.3022	0.30515	0.30515	0.29926	0.30957	0.30073	0.30957	0.29778	0.30073	0.31252	0.29631	0.30073	0.30515	0.3022	0.30073	0.31105	0.30663	0.30663	0.30957	0.30957	0.31399	0.3081	0.30663	0.30515	0.30073	0.29484	0.30663	0.30368	0.3022	0.31694	0.30957	0.29926	0.3022	0.30368	0.30368	0.3022	0.30663	0.30073	0.30515	0.30663	0.29926
	1.15e-07	0.33757	0.34199	0.33904	0.33315	0.34494	0.34494	0.33462	0.34199	0.3302	0.33462	0.33757	0.34052	0.33168	0.34052	0.3361	0.34199	0.33168	0.33904	0.3361	0.34199	0.34494	0.32873	0.33757	0.33462	0.33462	0.33757	0.33315	0.3361	0.34199	0.33904	0.34199	0.33315	0.33904	0.33904	0.33757	0.34199	0.33757	0.3361	0.33904	0.33315	0.34199	0.34052	0.33315	0.34052	0.3361	0.33904	0.33904	0.3361
	1.2e-07	0.36704	0.37883	0.37293	0.37293	0.36851	0.3803	0.36851	0.37293	0.36999	0.37588	0.37736	0.36262	0.37883	0.36999	0.36999	0.37293	0.37441	0.37441	0.37441	0.37736	0.37146	0.37441	0.36409	0.36999	0.37736	0.37146	0.37588	0.36557	0.36999	0.37146	0.37441	0.37588	0.37441	0.36704	0.37441	0.37588	0.37441	0.36704	0.37736	0.37883	0.37588	0.37146	0.36999	0.36409	0.37736	0.36851	0.37146	0.38325
	1.25e-07	0.40535	0.40093	0.40683	0.40977	0.40093	0.39504	0.40683	0.39651	0.41272	0.39946	0.40093	0.40093	0.40683	0.41419	0.40241	0.39946	0.40977	0.40977	0.40388	0.40241	0.40093	0.4083	0.40241	0.41567	0.40241	0.39946	0.40977	0.40388	0.4083	0.40388	0.40683	0.40388	0.39946	0.39651	0.40683	0.40241	0.40683	0.4083	0.39946	0.40388	0.40535	0.40535	0.40977	0.40683	0.40388	0.40683	0.40977	0.40093
	1.3e-07	0.44661	0.44219	0.43924	0.44219	0.43777	0.4304	0.43335	0.43924	0.43335	0.43777	0.43188	0.44514	0.43482	0.43335	0.44072	0.43777	0.43188	0.43335	0.43777	0.44072	0.44219	0.42746	0.43924	0.43924	0.43335	0.44366	0.43188	0.44219	0.43924	0.43482	0.43777	0.44072	0.44072	0.45103	0.44661	0.43777	0.44072	0.43777	0.44219	0.42893	0.4304	0.4363	0.43335	0.44072	0.4304	0.43924	0.43924	0.42893
	1.35e-07	0.47608	0.48198	0.47019	0.47166	0.47166	0.48198	0.47019	0.46429	0.46724	0.4805	0.47314	0.47019	0.46871	0.47756	0.46871	0.47314	0.47314	0.46871	0.46577	0.47608	0.4805	0.47314	0.47166	0.47314	0.47608	0.47756	0.46724	0.46724	0.47166	0.47314	0.47314	0.46282	0.46871	0.47166	0.47608	0.46724	0.47166	0.47166	0.46577	0.47019	0.48198	0.47461	0.47461	0.46724	0.46429	0.46871	0.46724	0.47756
	1.4e-07	0.50113	0.50408	0.50555	0.50555	0.50113	0.50555	0.51292	0.5085	0.50555	0.49671	0.51882	0.50408	0.51734	0.51439	0.50261	0.50555	0.50997	0.5085	0.51292	0.49819	0.50113	0.51439	0.49671	0.50997	0.49966	0.50555	0.51145	0.50555	0.50408	0.51145	0.5085	0.50555	0.50113	0.49671	0.49966	0.51145	0.50703	0.50555	0.49819	0.50997	0.50261	0.50408	0.50113	0.50703	0.51145	0.50555	0.51292	0.50408
	1.45e-07	0.53944	0.53502	0.53797	0.54239	0.53944	0.53208	0.53502	0.53944	0.54534	0.53208	0.53355	0.54239	0.53502	0.53355	0.53797	0.53502	0.53797	0.54092	0.54387	0.53944	0.54092	0.5306	0.5306	0.53944	0.53944	0.53355	0.54681	0.5365	0.5365	0.53944	0.54092	0.54387	0.53944	0.5365	0.54387	0.54387	0.53797	0.54239	0.54092	0.53502	0.53502	0.53944	0.5306	0.54092	0.54239	0.54092	0.54534	0.53355
	1.5e-07	0.57628	0.57628	0.57039	0.57334	0.57186	0.57039	0.56744	0.56007	0.57186	0.57776	0.56007	0.57186	0.57334	0.56449	0.57776	0.57186	0.56449	0.56744	0.56744	0.56744	0.57481	0.56744	0.57481	0.57039	0.57776	0.57334	0.5586	0.56892	0.56744	0.56449	0.56597	0.56744	0.57186	0.57776	0.57186	0.56302	0.57186	0.56744	0.57039	0.57186	0.57481	0.57186	0.58365	0.56449	0.56302	0.57186	0.56597	0.57039
	1.55e-07	0.60133	0.60281	0.60428	0.60575	0.60281	0.60281	0.61017	0.60575	0.60281	0.60723	0.6146	0.6087	0.60281	0.6087	0.59691	0.59986	0.60428	0.59986	0.59986	0.60428	0.60723	0.6087	0.59986	0.60281	0.6087	0.60133	0.59986	0.61017	0.60133	0.60723	0.61165	0.59839	0.58954	0.59839	0.59397	0.59839	0.60575	0.60428	0.59102	0.60281	0.60133	0.59691	0.59986	0.60575	0.59839	0.60133	0.59839	0.60575
	1.6e-07	0.62638	0.6367	0.63375	0.63228	0.63375	0.6367	0.6308	0.63522	0.62491	0.62933	0.6308	0.6308	0.6308	0.63965	0.62638	0.63228	0.63522	0.6367	0.63375	0.6308	0.63522	0.6308	0.63375	0.62786	0.61754	0.62933	0.63522	0.62786	0.6367	0.63522	0.63522	0.63375	0.63228	0.62344	0.63375	0.63965	0.63228	0.63228	0.63522	0.63522	0.62638	0.63965	0.62344	0.63817	0.63228	0.63228	0.64112	0.63228
	1.65e-07	0.6647	0.66027	0.66322	0.6647	0.66617	0.6647	0.65438	0.65438	0.67206	0.6647	0.66175	0.66027	0.67943	0.66322	0.66617	0.66175	0.66175	0.66322	0.66764	0.65585	0.66027	0.6647	0.6647	0.6647	0.67501	0.66617	0.66027	0.6588	0.66322	0.66322	0.65733	0.67354	0.67796	0.66175	0.66175	0.66617	0.66027	0.66027	0.6647	0.66322	0.66175	0.6647	0.66617	0.65291	0.66322	0.66175	0.66764	0.67059
	1.7e-07	0.69564	0.69417	0.69711	0.69711	0.69564	0.68385	0.69564	0.69417	0.70595	0.69122	0.70301	0.70153	0.6868	0.69269	0.69417	0.69122	0.70153	0.69564	0.70006	0.69269	0.69564	0.69859	0.68975	0.70301	0.69711	0.69711	0.70006	0.70301	0.69122	0.69417	0.69269	0.68975	0.69417	0.70153	0.69269	0.69564	0.69859	0.70153	0.68975	0.69859	0.69564	0.69417	0.69417	0.68827	0.68532	0.69859	0.69269	0.69417
	1.75e-07	0.72658	0.72658	0.731	0.72658	0.72806	0.731	0.73543	0.72953	0.71922	0.72216	0.72216	0.72069	0.72069	0.72953	0.72216	0.731	0.7148	0.71774	0.72069	0.73395	0.73395	0.71332	0.72658	0.7148	0.72216	0.72511	0.72511	0.72511	0.72806	0.72658	0.73543	0.72806	0.71185	0.72953	0.72511	0.72069	0.731	0.72216	0.72511	0.71922	0.72216	0.72658	0.72069	0.72806	0.72364	0.72069	0.72069	0.72364
	1.8e-07	0.75311	0.75605	0.76195	0.75311	0.75163	0.76342	0.74574	0.74869	0.75458	0.75753	0.75311	0.75311	0.76195	0.76048	0.74721	0.75163	0.759	0.759	0.759	0.75458	0.75605	0.75605	0.75163	0.75311	0.75311	0.75163	0.74721	0.75311	0.759	0.75311	0.75163	0.75605	0.76048	0.75311	0.74721	0.76342	0.76195	0.75163	0.75458	0.759	0.76048	0.75605	0.75605	0.75458	0.759	0.74869	0.759	0.7649
	1.85e-07	0.78258	0.78258	0.77963	0.78258	0.787	0.78111	0.78847	0.787	0.78847	0.77816	0.79289	0.78553	0.78258	0.78258	0.78553	0.77963	0.79142	0.78847	0.78995	0.77963	0.77963	0.79879	0.78111	0.79879	0.78405	0.78111	0.78553	0.787	0.77816	0.78553	0.78111	0.78553	0.78995	0.78258	0.78553	0.78553	0.77668	0.78111	0.78258	0.787	0.77963	0.787	0.78405	0.77668	0.78111	0.78847	0.78405	0.78258
	1.9e-07	0.81205	0.81794	0.81352	0.815	0.815	0.8091	0.815	0.8091	0.81205	0.81058	0.81205	0.81647	0.81352	0.80763	0.815	0.8091	0.81058	0.80763	0.8091	0.81352	0.815	0.80616	0.81647	0.81058	0.81058	0.815	0.815	0.81205	0.8091	0.81058	0.81205	0.81205	0.81205	0.815	0.81352	0.81647	0.815	0.81352	0.81205	0.80763	0.80026	0.815	0.80763	0.81352	0.81352	0.81942	0.8091	0.81205
	1.95e-07	0.84741	0.84741	0.83857	0.84594	0.84447	0.84447	0.84005	0.8371	0.84152	0.84741	0.8371	0.83415	0.84889	0.84594	0.83563	0.84594	0.83563	0.8371	0.8371	0.84005	0.85036	0.83415	0.84299	0.84299	0.84005	0.84594	0.82973	0.84594	0.84447	0.85036	0.84152	0.84447	0.84005	0.83857	0.84152	0.8371	0.84889	0.84299	0.8371	0.84299	0.85478	0.84152	0.84447	0.84152	0.83857	0.83268	0.84005	0.84741
	2e-07	0.87394	0.87099	0.87689	0.8651	0.87541	0.86804	0.87099	0.87689	0.87394	0.86804	0.88131	0.87394	0.86952	0.87099	0.86362	0.87394	0.87246	0.87394	0.87246	0.87099	0.87099	0.87541	0.86215	0.87246	0.87394	0.86804	0.87541	0.87541	0.86804	0.87099	0.87246	0.8651	0.85773	0.87246	0.86215	0.87246	0.86657	0.86657	0.86362	0.87246	0.87246	0.87689	0.86068	0.87099	0.87099	0.86362	0.87099	0.87394
	2.05e-07	0.89604	0.90636	0.90194	0.90046	0.89015	0.90341	0.90046	0.89899	0.89899	0.89751	0.89604	0.90194	0.89899	0.89751	0.90488	0.89751	0.90341	0.90046	0.90488	0.90046	0.90488	0.90488	0.89457	0.90636	0.89604	0.89309	0.90488	0.88867	0.89604	0.90046	0.89899	0.90488	0.90341	0.89899	0.90783	0.90783	0.89899	0.90046	0.91372	0.90194	0.89015	0.89899	0.89899	0.90488	0.89899	0.90783	0.90046	0.90046
	2.1e-07	0.93877	0.92551	0.92109	0.93435	0.92993	0.92109	0.92699	0.92109	0.92993	0.92846	0.92256	0.92256	0.93288	0.92699	0.92846	0.92846	0.92109	0.92404	0.92699	0.92404	0.92699	0.92256	0.9373	0.92551	0.92551	0.93288	0.92404	0.92551	0.92404	0.92993	0.92699	0.92846	0.93288	0.92551	0.93141	0.92404	0.93141	0.93435	0.93141	0.92109	0.92846	0.91814	0.93288	0.92551	0.92551	0.92404	0.92846	0.92404
	2.15e-07	0.95646	0.96088	0.96088	0.95498	0.96677	0.95498	0.96088	0.95793	0.9594	0.96088	0.96677	0.96235	0.94762	0.95204	0.95204	0.95498	0.96235	0.95056	0.95498	0.95793	0.96235	0.9594	0.96677	0.9594	0.95204	0.95646	0.95056	0.96824	0.95498	0.96382	0.9594	0.95498	0.95056	0.96382	0.94614	0.95646	0.9594	0.95793	0.94909	0.95793	0.96824	0.96382	0.95646	0.95498	0.95056	0.95204	0.95498	0.96235
	2.2e-07	0.97709	0.99329	0.99035	0.98003	0.98151	0.99624	0.98887	0.99329	0.97856	0.98003	0.9874	0.98151	0.98887	0.98445	0.9874	0.99329	0.98445	0.98887	0.99477	0.99035	0.98445	0.99329	0.97856	0.98593	0.98003	0.9874	0.99035	0.98445	0.9874	0.98887	0.98445	0.98151	0.98298	0.98151	0.98887	0.99329	0.98003	0.98151	0.99329	0.98298	0.97856	0.9874	0.97709	0.9874	0.99329	0.98151	0.98445	0.98887
	2.25e-07	1.01687	1.01245	1.01098	1.01687	1.01834	1.01245	1.00508	1.0095	1.01982	1.01245	1.0154	1.01687	1.02129	1.01982	1.01392	1.0154	1.0154	1.01245	1.01687	1.01098	1.01982	1.01098	1.01245	1.01687	1.02277	1.01245	1.01392	1.00656	1.01687	1.0154	1.0154	1.02277	1.01982	1.00803	1.0154	1.01687	1.01392	1.02129	1.01834	1.01834	1.01392	1.01392	1.01687	1.01392	1.01687	1.01834	1.02277	1.01687
	2.3e-07	1.04782	1.0434	1.03897	1.05224	1.04929	1.04045	1.04929	1.04192	1.05224	1.0434	1.04192	1.04782	1.03897	1.03603	1.0434	1.04045	1.04634	1.04192	1.04634	1.04045	1.04192	1.04192	1.05224	1.05224	1.04487	1.04487	1.04192	1.04782	1.03161	1.04782	1.04045	1.05076	1.03897	1.05371	1.03897	1.04045	1.04634	1.04487	1.03897	1.04487	1.04487	1.0434	1.05371	1.03897	1.0375	1.04192	1.04782	1.04634
	2.35e-07	1.07139	1.07729	1.07581	1.07139	1.07581	1.07581	1.08171	1.08171	1.07287	1.08023	1.06992	1.07139	1.07434	1.07434	1.07581	1.07876	1.06992	1.06845	1.06845	1.08465	1.07581	1.06992	1.07876	1.06992	1.06402	1.07876	1.07581	1.07287	1.07287	1.07581	1.06992	1.06845	1.0655	1.08023	1.07139	1.07581	1.08023	1.07581	1.07434	1.06845	1.07581	1.07287	1.06845	1.08465	1.07876	1.07139	1.06845	1.07139
	2.4e-07	1.09792	1.10528	1.10234	1.10086	1.10823	1.10528	1.09792	1.10086	1.09644	1.10234	1.09939	1.10086	1.10676	1.10823	1.10086	1.10381	1.10086	1.09939	1.10676	1.11118	1.11265	1.10234	1.10086	1.10381	1.10528	1.09939	1.10086	1.09644	1.10823	1.10823	1.10381	1.10528	1.10086	1.09792	1.10086	1.10381	1.09939	1.10528	1.10086	1.10676	1.10381	1.10234	1.09497	1.10528	1.10234	1.10381	1.10528	1.10676
	2.45e-07	1.13623	1.13181	1.12444	1.13033	1.12886	1.13181	1.13181	1.13328	1.13918	1.12591	1.13623	1.13181	1.13623	1.12444	1.13033	1.12591	1.14507	1.13475	1.14065	1.12297	1.12739	1.13328	1.1377	1.1377	1.13328	1.13328	1.13918	1.13033	1.12739	1.13623	1.13328	1.13918	1.13475	1.12591	1.12739	1.12886	1.13033	1.13181	1.13033	1.13033	1.13181	1.13033	1.14065	1.12591	1.12739	1.12739	1.13623	1.13181
	2.5e-07	1.15686	1.15244	1.15686	1.16275	1.15833	1.15391	1.15833	1.15686	1.1598	1.15833	1.14802	1.15686	1.16128	1.16275	1.15686	1.15686	1.15538	1.15538	1.15096	1.1598	1.15096	1.15538	1.1598	1.16128	1.16128	1.1598	1.15686	1.15538	1.15391	1.15244	1.15538	1.16275	1.15538	1.16275	1.16128	1.15538	1.1598	1.16275	1.1598	1.15686	1.15686	1.16128	1.15538	1.15391	1.16275	1.16275	1.1598	1.15096
	2.55e-07	1.17896	1.18043	1.17454	1.18191	1.18043	1.17454	1.17601	1.18043	1.17012	1.18485	1.17454	1.17749	1.17601	1.17896	1.17307	1.17601	1.16865	1.17012	1.17454	1.18043	1.18485	1.1657	1.17896	1.17454	1.17601	1.18338	1.16865	1.18191	1.18043	1.17896	1.17896	1.17307	1.17307	1.17159	1.17307	1.17749	1.17601	1.17749	1.17307	1.17307	1.17749	1.17159	1.17749	1.17307	1.17601	1.17159	1.17012	1.17454
	2.6e-07	1.19075	1.19517	1.19812	1.18633	1.19664	1.19517	1.20254	1.19812	1.19222	1.19222	1.19812	1.19959	1.19517	1.18928	1.19517	1.19959	1.19664	1.1878	1.20548	1.19222	1.19517	1.20106	1.19664	1.19664	1.1937	1.19222	1.19517	1.18928	1.1937	1.20548	1.19664	1.19812	1.18928	1.19812	1.18633	1.19222	1.19517	1.19222	1.19075	1.19812	1.19812	1.19812	1.19222	1.19812	1.18633	1.1878	1.19812	1.19664
	2.65e-07	1.19812	1.19812	1.20696	1.20254	1.19812	1.21138	1.20401	1.20696	1.20991	1.19959	1.19959	1.1937	1.21138	1.20696	1.20401	1.19812	1.20696	1.21433	1.20548	1.20254	1.19959	1.20843	1.20106	1.20843	1.20696	1.20401	1.20843	1.20254	1.20696	1.20254	1.20106	1.20843	1.21138	1.20401	1.20991	1.20991	1.19959	1.19812	1.2158	1.20254	1.1937	1.20696	1.19959	1.19959	1.21138	1.20843	1.20401	1.19812
	2.7e-07	1.2158	1.20991	1.20548	1.21727	1.20843	1.20696	1.20254	1.21285	1.20991	1.21433	1.21138	1.21433	1.21285	1.21138	1.21875	1.20696	1.20991	1.21138	1.20548	1.21285	1.22317	1.20843	1.21875	1.21433	1.2158	1.22022	1.20696	1.20991	1.20843	1.20843	1.20696	1.21727	1.20843	1.20991	1.21875	1.20991	1.21433	1.22022	1.2158	1.20843	1.21285	1.21285	1.2158	1.21285	1.21433	1.21433	1.21875	1.21875
	2.75e-07	1.22169	1.22464	1.22317	1.21433	1.22464	1.22169	1.22611	1.21727	1.22022	1.22759	1.22169	1.22611	1.20991	1.22317	1.22169	1.22464	1.21875	1.20991	1.22317	1.22022	1.22169	1.21875	1.22906	1.21875	1.22611	1.21875	1.22169	1.22317	1.22169	1.23348	1.22169	1.22317	1.21433	1.22759	1.20843	1.21433	1.22611	1.22317	1.21138	1.21875	1.22611	1.22169	1.22317	1.22169	1.21138	1.21138	1.21433	1.22169
	2.8e-07	1.22169	1.22317	1.22906	1.22317	1.22464	1.22464	1.22906	1.23053	1.22317	1.22169	1.22169	1.21727	1.22464	1.23053	1.2158	1.22169	1.22169	1.23201	1.2158	1.22611	1.21727	1.22464	1.2158	1.22611	1.21727	1.22464	1.22317	1.21727	1.22464	1.22317	1.22464	1.22169	1.22169	1.22317	1.21875	1.22906	1.21875	1.22169	1.22317	1.22169	1.22611	1.22759	1.22022	1.22906	1.23053	1.22022	1.22022	1.22022
	2.85e-07	1.22022	1.22317	1.22022	1.22906	1.21285	1.22464	1.21727	1.22464	1.22022	1.22169	1.22317	1.21433	1.22759	1.22022	1.22022	1.21433	1.22464	1.22759	1.22611	1.22022	1.22759	1.22022	1.22169	1.22464	1.22317	1.21875	1.22464	1.21875	1.22022	1.22317	1.22464	1.23053	1.22317	1.20991	1.23201	1.22611	1.21875	1.22169	1.23053	1.22464	1.22317	1.22169	1.22169	1.21875	1.22611	1.22759	1.23053	1.22906
	2.9e-07	1.22759	1.21727	1.22022	1.22169	1.22759	1.21875	1.22464	1.22022	1.22759	1.22759	1.22169	1.22906	1.21875	1.22317	1.23348	1.22317	1.22464	1.2158	1.23201	1.21727	1.22759	1.22317	1.22906	1.22464	1.22759	1.23201	1.22611	1.22759	1.21875	1.22317	1.21875	1.23201	1.23053	1.22611	1.21875	1.21875	1.22611	1.22759	1.2158	1.22169	1.22022	1.22169	1.22464	1.21433	1.21727	1.21727	1.22169	1.22317
	2.95e-07	1.21875	1.22317	1.22464	1.22464	1.22317	1.22169	1.23201	1.23201	1.22022	1.21875	1.21875	1.23053	1.22317	1.22611	1.22169	1.22317	1.22317	1.22759	1.21285	1.22759	1.22022	1.22464	1.22611	1.2158	1.22169	1.22759	1.22022	1.22169	1.22317	1.22611	1.22464	1.22022	1.21875	1.22611	1.21727	1.21875	1.22169	1.22169	1.22317	1.22022	1.22022	1.22169	1.21727	1.22759	1.21727	1.22317	1.21433	1.22022
	3e-07	1.21285	1.22317	1.21727	1.2158	1.20843	1.22611	1.20843	1.22759	1.2158	1.22169	1.22317	1.20991	1.21727	1.22464	1.21138	1.2158	1.21727	1.21875	1.21138	1.22022	1.22022	1.21138	1.21138	1.21727	1.21285	1.21727	1.21875	1.21138	1.22022	1.2158	1.21138	1.22169	1.21285	1.20696	1.21727	1.21875	1.22169	1.21433	1.21875	1.22022	1.22169	1.22022	1.21138	1.21727	1.22169	1.21875	1.22317	1.22759
	3.05e-07	1.21433	1.21138	1.21138	1.20843	1.21875	1.20991	1.21875	1.21138	1.2158	1.22022	1.21433	1.21727	1.22022	1.21285	1.22169	1.2158	1.22022	1.21433	1.23201	1.21285	1.21285	1.22022	1.21727	1.22317	1.22022	1.22022	1.21875	1.21433	1.21285	1.21727	1.21138	1.22317	1.21433	1.21433	1.21875	1.21138	1.21138	1.22317	1.21433	1.20843	1.21285	1.22022	1.21285	1.21138	1.21875	1.21138	1.21875	1.22022
	3.1e-07	1.21433	1.20106	1.2158	1.21875	1.20696	1.20696	1.21433	1.20991	1.21285	1.20696	1.20401	1.21138	1.2158	1.20696	1.2158	1.20696	1.20696	1.22464	1.21433	1.20991	1.20843	1.21285	1.21433	1.21875	1.22169	1.20991	1.21285	1.20401	1.20696	1.20991	1.20991	1.20843	1.2158	1.21433	1.20696	1.21285	1.20696	1.20991	1.21433	1.21433	1.20548	1.20991	1.2158	1.20991	1.20991	1.21875	1.20696	1.19959
	3.15e-07	1.20401	1.20991	1.20106	1.20843	1.20548	1.20548	1.20401	1.21285	1.20696	1.20254	1.20843	1.20548	1.19812	1.20991	1.20548	1.19664	1.19812	1.20401	1.1937	1.20401	1.20843	1.19959	1.20843	1.20254	1.20254	1.20843	1.20696	1.21285	1.20401	1.20254	1.20106	1.20991	1.20106	1.20401	1.21138	1.20254	1.21138	1.20254	1.20106	1.20548	1.20548	1.20106	1.20548	1.20843	1.20991	1.20548	1.21285	1.21138
	3.2e-07	1.20401	1.21138	1.19959	1.1878	1.20254	1.20548	1.20696	1.20696	1.19222	1.20401	1.20696	1.20106	1.20548	1.20991	1.20106	1.20843	1.20254	1.19075	1.21138	1.20254	1.20696	1.20548	1.20696	1.19959	1.20548	1.19664	1.19517	1.20254	1.20696	1.21138	1.20254	1.20254	1.19664	1.19664	1.1937	1.19664	1.20254	1.20548	1.20254	1.19664	1.20254	1.20548	1.20254	1.20106	1.19517	1.18928	1.20254	1.21285
	3.25e-07	1.19959	1.1878	1.20401	1.19222	1.18928	1.19222	1.19664	1.19812	1.20106	1.19517	1.1937	1.19517	1.20991	1.19812	1.1937	1.19812	1.20548	1.20991	1.20548	1.19812	1.19222	1.20843	1.1937	1.20401	1.20106	1.20254	1.20401	1.19075	1.19812	1.19812	1.19664	1.20106	1.20106	1.19517	1.20106	1.21138	1.19222	1.20548	1.19959	1.20254	1.19222	1.20696	1.18485	1.19517	1.19959	1.20401	1.19664	1.19664
	3.3e-07	1.1937	1.18928	1.18485	1.19812	1.18928	1.19222	1.18633	1.19517	1.19664	1.19075	1.19517	1.19075	1.19075	1.18633	1.19664	1.18633	1.19222	1.19222	1.1878	1.19664	1.18928	1.18485	1.19075	1.19517	1.19812	1.19664	1.19222	1.1878	1.1878	1.18191	1.18928	1.1937	1.18928	1.19075	1.20106	1.19222	1.1937	1.19222	1.19664	1.19664	1.19664	1.1878	1.19664	1.19222	1.19517	1.20548	1.19664	1.19075
	3.35e-07	1.19517	1.19664	1.1878	1.18633	1.19959	1.18928	1.19517	1.18928	1.1878	1.19517	1.18928	1.1878	1.1878	1.19075	1.18633	1.1878	1.18928	1.18191	1.19517	1.1937	1.19517	1.1878	1.19222	1.19075	1.19222	1.1878	1.19075	1.19812	1.18928	1.19517	1.18485	1.19664	1.1878	1.19517	1.19222	1.18191	1.19959	1.1937	1.18485	1.18043	1.19959	1.18633	1.19664	1.1878	1.18633	1.17749	1.18633	1.18928
	3.4e-07	1.18633	1.1878	1.1937	1.18485	1.18633	1.19517	1.19075	1.19517	1.18338	1.18338	1.18633	1.18485	1.19075	1.19075	1.18338	1.19812	1.18633	1.18928	1.19222	1.1878	1.18928	1.20106	1.1878	1.18191	1.18928	1.1878	1.19075	1.19222	1.19517	1.19517	1.19075	1.18338	1.18191	1.18485	1.17896	1.19222	1.18633	1.1878	1.18485	1.19664	1.19517	1.19812	1.18191	1.19075	1.18633	1.18338	1.18633	1.19075
	3.45e-07	1.18191	1.18338	1.17896	1.18043	1.17454	1.18633	1.17896	1.18338	1.18338	1.18043	1.18485	1.18338	1.18338	1.18338	1.18485	1.18191	1.1878	1.19222	1.18485	1.17896	1.18338	1.1878	1.17307	1.18485	1.18338	1.17896	1.1878	1.17307	1.17601	1.17749	1.18928	1.18928	1.1878	1.17749	1.19222	1.19075	1.18191	1.17749	1.18485	1.19222	1.17454	1.18633	1.18338	1.18485	1.18191	1.1937	1.18338	1.18928
	3.5e-07	1.18928	1.18338	1.18043	1.18633	1.18633	1.17896	1.18485	1.18043	1.1878	1.18191	1.17896	1.18191	1.18191	1.18338	1.19075	1.18191	1.18485	1.17454	1.18338	1.17896	1.18191	1.18191	1.18928	1.18928	1.19075	1.19075	1.18191	1.18338	1.17749	1.18633	1.17896	1.18633	1.18633	1.18338	1.19075	1.17749	1.18485	1.19222	1.18485	1.17307	1.17749	1.18928	1.19222	1.1878	1.18338	1.18338	1.18633	1.18043
	3.55e-07	1.18191	1.18043	1.18633	1.18633	1.19075	1.18485	1.18485	1.18633	1.17749	1.1878	1.18191	1.18633	1.1878	1.18043	1.17749	1.18191	1.18191	1.18485	1.18338	1.18485	1.17601	1.1878	1.1878	1.18191	1.18191	1.1878	1.18191	1.1878	1.1878	1.18485	1.18043	1.18191	1.17749	1.18928	1.17749	1.18191	1.19075	1.1878	1.18191	1.18338	1.1937	1.18043	1.18485	1.17159	1.18191	1.17749	1.17454	1.18043
	3.6e-07	1.17896	1.18485	1.18191	1.18043	1.18043	1.18191	1.17749	1.18043	1.17896	1.18191	1.19075	1.18191	1.17896	1.18338	1.18191	1.18338	1.17454	1.18191	1.17601	1.18485	1.18043	1.17896	1.17307	1.17012	1.17896	1.17749	1.18338	1.17749	1.18633	1.18633	1.18338	1.17896	1.18043	1.17307	1.18043	1.18485	1.17896	1.17454	1.17601	1.18928	1.18485	1.17749	1.17307	1.18485	1.17896	1.18633	1.18043	1.1878
	3.65e-07	1.17896	1.18485	1.17454	1.18191	1.17896	1.18043	1.18633	1.18633	1.18338	1.17896	1.18633	1.17749	1.18338	1.18633	1.17896	1.18191	1.18191	1.1878	1.18485	1.17601	1.18338	1.18191	1.17896	1.18485	1.18485	1.18338	1.17896	1.18338	1.17307	1.1878	1.18043	1.17896	1.18191	1.18338	1.18928	1.18485	1.17896	1.17749	1.18191	1.17454	1.17601	1.18928	1.18338	1.18633	1.1878	1.17454	1.1878	1.18043
	3.7e-07	1.1878	1.18191	1.18633	1.18338	1.17601	1.17749	1.18485	1.17454	1.18485	1.17896	1.17454	1.18191	1.18485	1.17601	1.1878	1.17307	1.18633	1.18043	1.18485	1.17454	1.18191	1.1878	1.18338	1.19222	1.18485	1.1878	1.18633	1.17896	1.18338	1.18485	1.17749	1.18928	1.17896	1.1878	1.18633	1.19664	1.1878	1.18633	1.18338	1.18191	1.18338	1.1878	1.18633	1.17749	1.17896	1.18633	1.18043	1.17601
	3.75e-07	1.18191	1.17896	1.17749	1.17749	1.18928	1.17896	1.18191	1.18485	1.17896	1.18485	1.18633	1.18338	1.17896	1.17896	1.18338	1.18338	1.18338	1.17601	1.18633	1.18338	1.18485	1.18338	1.18633	1.17749	1.18043	1.1878	1.17307	1.18191	1.1878	1.18338	1.18191	1.17896	1.18043	1.17896	1.1878	1.18043	1.17896	1.18043	1.18338	1.18928	1.18633	1.17896	1.18191	1.18338	1.17454	1.18633	1.18043	1.18338
	3.8e-07	1.1878	1.1878	1.1878	1.17896	1.19075	1.19222	1.1878	1.18928	1.1878	1.18485	1.19222	1.18928	1.18043	1.19812	1.17896	1.18633	1.18191	1.18485	1.17896	1.18633	1.18633	1.18191	1.18191	1.18043	1.18043	1.18928	1.17749	1.18043	1.18191	1.1878	1.19222	1.17749	1.18191	1.18633	1.18338	1.18191	1.18338	1.18191	1.18043	1.18043	1.18043	1.18928	1.18043	1.18928	1.18191	1.17896	1.18043	1.19075
	3.85e-07	1.18338	1.18633	1.1937	1.18928	1.18043	1.19075	1.18043	1.18043	1.18633	1.18043	1.18338	1.18338	1.1937	1.18633	1.18485	1.19075	1.19222	1.18338	1.1937	1.18191	1.18191	1.18928	1.18485	1.19517	1.1878	1.17896	1.19222	1.18928	1.1878	1.18485	1.18338	1.1878	1.18633	1.18633	1.18191	1.19222	1.18338	1.18485	1.1878	1.18633	1.18485	1.19812	1.17454	1.19075	1.1937	1.19075	1.19222	1.18338
	3.9e-07	1.19075	1.17749	1.17454	1.18633	1.18633	1.18485	1.18043	1.18485	1.18633	1.1878	1.18191	1.18633	1.18191	1.18338	1.1878	1.18043	1.19222	1.18633	1.18338	1.17896	1.17896	1.17749	1.17749	1.18338	1.19075	1.18043	1.1878	1.17896	1.18191	1.18043	1.17749	1.1878	1.18633	1.18338	1.1937	1.19222	1.18485	1.18043	1.1937	1.19075	1.18633	1.18633	1.19222	1.17159	1.18485	1.19222	1.1878	1.19075
	3.95e-07	1.19222	1.18928	1.19075	1.19222	1.19222	1.18191	1.19517	1.18928	1.19517	1.19222	1.19222	1.19222	1.18338	1.19517	1.18633	1.18633	1.1878	1.18338	1.18043	1.1878	1.19664	1.18338	1.1878	1.1878	1.1878	1.19959	1.18191	1.1878	1.19075	1.19222	1.18928	1.18191	1.18338	1.19075	1.1878	1.17749	1.19664	1.18191	1.18338	1.18633	1.18928	1.1878	1.18485	1.18928	1.18043	1.18485	1.18191	1.18338
	4e-07	1.1878	1.19517	1.19812	1.18633	1.18928	1.1937	1.1937	1.19075	1.19075	1.1937	1.1937	1.18485	1.20106	1.18928	1.18191	1.1878	1.18191	1.18633	1.19517	1.19664	1.18485	1.19075	1.19075	1.18485	1.18928	1.18633	1.1878	1.19959	1.18928	1.18928	1.19959	1.18338	1.1878	1.19222	1.17749	1.1937	1.18633	1.18928	1.18485	1.18633	1.18928	1.20106	1.18485	1.19517	1.19075	1.17749	1.18485	1.18928
	4.05e-07	1.19075	1.1878	1.18043	1.18338	1.19075	1.19075	1.18043	1.19517	1.19075	1.18928	1.18928	1.19222	1.1878	1.19075	1.18928	1.19222	1.20106	1.18928	1.19222	1.18338	1.18633	1.19222	1.18485	1.1878	1.18191	1.1878	1.1937	1.18485	1.19222	1.18928	1.18928	1.1878	1.19517	1.18191	1.19075	1.19959	1.18633	1.18338	1.19812	1.19517	1.1937	1.19075	1.18633	1.1937	1.19222	1.1937	1.19812	1.19812
	4.1e-07	1.19222	1.18633	1.18928	1.19959	1.19222	1.1878	1.18928	1.1878	1.19222	1.18633	1.19075	1.19664	1.19222	1.19517	1.1878	1.19664	1.19517	1.19222	1.1878	1.18928	1.19075	1.1878	1.18633	1.19812	1.19959	1.1937	1.18928	1.1878	1.19222	1.19075	1.18485	1.19075	1.1878	1.19075	1.19812	1.1878	1.19222	1.19812	1.18928	1.1878	1.17749	1.19517	1.19075	1.18633	1.18928	1.19075	1.18928	1.18338
	4.15e-07	1.19664	1.19812	1.20106	1.19517	1.19664	1.19222	1.19664	1.19075	1.19959	1.19664	1.1937	1.19075	1.19664	1.19664	1.19222	1.17896	1.18485	1.19222	1.19812	1.19959	1.19222	1.18338	1.19959	1.1937	1.1937	1.19959	1.19075	1.19812	1.1937	1.19222	1.19222	1.19075	1.19222	1.20106	1.18633	1.19664	1.19517	1.19517	1.18485	1.18928	1.19664	1.18928	1.19517	1.19222	1.19222	1.19222	1.18633	1.1878
	4.2e-07	1.19812	1.20401	1.19075	1.18928	1.19517	1.19812	1.19222	1.19664	1.1878	1.19664	1.1937	1.1937	1.19075	1.19075	1.19075	1.19812	1.19959	1.18633	1.1937	1.19664	1.19812	1.1937	1.19222	1.1878	1.18485	1.1878	1.19222	1.19075	1.19664	1.20106	1.20254	1.19075	1.1937	1.18633	1.1937	1.19664	1.19222	1.1937	1.19517	1.19664	1.20401	1.19517	1.1878	1.20106	1.19222	1.18928	1.1937	1.20254
	4.25e-07	1.18485	1.19222	1.19959	1.19075	1.18928	1.19222	1.19222	1.1937	1.19664	1.19075	1.19664	1.18633	1.19222	1.20843	1.18485	1.20548	1.19517	1.20254	1.19517	1.1878	1.19517	1.19664	1.18633	1.1937	1.1937	1.19812	1.19222	1.1878	1.19075	1.19075	1.18928	1.19075	1.19222	1.19517	1.20254	1.19664	1.19517	1.1937	1.19812	1.19812	1.1878	1.20548	1.19075	1.1937	1.19222	1.19517	1.1878	1.1937
	4.3e-07	1.19959	1.19075	1.19517	1.20106	1.19517	1.19517	1.19959	1.19517	1.20843	1.18928	1.19075	1.19517	1.20254	1.1937	1.19959	1.18485	1.19222	1.19222	1.19517	1.19812	1.18928	1.1937	1.19812	1.20401	1.20106	1.19959	1.20106	1.19959	1.18928	1.19517	1.1878	1.20106	1.20106	1.19664	1.18928	1.20106	1.19222	1.19664	1.19222	1.1937	1.1937	1.19664	1.19664	1.19517	1.19517	1.20401	1.20401	1.18633
	4.35e-07	1.20254	1.19959	1.19075	1.19959	1.20254	1.19812	1.1937	1.19222	1.19222	1.19664	1.19517	1.20106	1.19075	1.18928	1.20106	1.18633	1.19959	1.19222	1.19959	1.19517	1.20106	1.19222	1.19812	1.19222	1.19664	1.19959	1.19812	1.19664	1.1937	1.19959	1.19812	1.1937	1.19075	1.19812	1.19222	1.19075	1.19075	1.20401	1.19517	1.18928	1.20548	1.18928	1.19812	1.19075	1.19222	1.1878	1.1937	1.19222
	4.4e-07	1.1878	1.20843	1.19664	1.1937	1.19959	1.20401	1.19664	1.1937	1.1937	1.20548	1.20401	1.19222	1.19075	1.20843	1.18338	1.20843	1.18633	1.18928	1.18633	1.18928	1.19517	1.19222	1.19517	1.19664	1.19075	1.20254	1.18928	1.19664	1.19959	1.19812	1.19959	1.1937	1.1878	1.19517	1.20254	1.19664	1.20254	1.19075	1.18928	1.19517	1.20106	1.19812	1.18928	1.19959	1.1937	1.18928	1.19222	1.20401
	4.45e-07	1.19959	1.19517	1.20548	1.19517	1.18928	1.20254	1.19812	1.19222	1.19959	1.19517	1.1937	1.19222	1.20843	1.20254	1.19517	1.19222	1.19959	1.20106	1.20106	1.20106	1.19075	1.19812	1.19222	1.19959	1.19812	1.19222	1.20254	1.1937	1.19664	1.1937	1.18928	1.19517	1.20106	1.19075	1.18928	1.20254	1.19664	1.19664	1.20106	1.19222	1.19075	1.20106	1.1937	1.19517	1.20254	1.19664	1.19959	1.20106
	4.5e-07	1.1937	1.19517	1.19222	1.19664	1.1937	1.19075	1.1937	1.20106	1.20696	1.19812	1.19517	1.19517	1.19664	1.19075	1.21285	1.19075	1.20254	1.19812	1.20696	1.19517	1.20254	1.20254	1.1937	1.19517	1.20254	1.1937	1.1937	1.19222	1.19075	1.1937	1.19664	1.20106	1.20254	1.19517	1.19812	1.20401	1.19075	1.20548	1.19812	1.20254	1.19959	1.19517	1.19812	1.1878	1.19222	1.20254	1.20401	1.18928
	4.55e-07	1.19664	1.20843	1.19812	1.20548	1.21138	1.19959	1.20548	1.19517	1.20254	1.20254	1.20106	1.20106	1.19517	1.20106	1.18928	1.20548	1.20401	1.1937	1.1937	1.19517	1.20548	1.19222	1.20548	1.20254	1.20254	1.21727	1.19812	1.20401	1.19517	1.20548	1.20106	1.20548	1.19075	1.20991	1.20254	1.19517	1.20401	1.20401	1.1937	1.19812	1.20106	1.1937	1.19959	1.20106	1.1937	1.19664	1.19517	1.19812
	4.6e-07	1.21285	1.20843	1.21138	1.20548	1.20401	1.21138	1.20843	1.20254	1.20696	1.20548	1.21285	1.20696	1.20696	1.21285	1.19959	1.19959	1.19959	1.20106	1.20401	1.20843	1.20548	1.20106	1.20696	1.20106	1.20106	1.20401	1.20254	1.21285	1.20696	1.20254	1.20991	1.19812	1.20991	1.20696	1.1937	1.20401	1.20696	1.20401	1.19959	1.20106	1.21433	1.20548	1.20254	1.20696	1.20401	1.20401	1.20548	1.20548
	4.65e-07	1.20254	1.21138	1.20696	1.21433	1.21285	1.21138	1.21138	1.20843	1.21138	1.20548	1.20991	1.20696	1.2158	1.21285	1.22022	1.20696	1.2158	1.21433	1.2158	1.20843	1.21285	1.21875	1.20843	1.20991	1.20991	1.20843	1.21433	1.20401	1.21138	1.20548	1.20843	1.21875	1.20991	1.20401	1.21138	1.21727	1.20991	1.20401	1.21727	1.21433	1.21285	1.21138	1.20548	1.20548	1.22022	1.20843	1.21875	1.2158
	4.7e-07	1.21875	1.22169	1.20991	1.22317	1.20843	1.21727	1.22022	1.2158	1.22169	1.22464	1.21875	1.21727	1.21285	1.2158	1.20843	1.21875	1.22169	1.22022	1.22022	1.21285	1.21727	1.21727	1.21433	1.22317	1.22317	1.22169	1.22464	1.2158	1.21727	1.22464	1.22464	1.22022	1.21138	1.22022	1.22759	1.21727	1.21875	1.22169	1.22169	1.21875	1.20843	1.22022	1.22022	1.21727	1.21875	1.22611	1.21433	1.21138
	4.75e-07	1.23348	1.22022	1.22464	1.22611	1.22464	1.22169	1.22464	1.22317	1.22759	1.22169	1.22022	1.23201	1.22611	1.22611	1.22169	1.22169	1.22022	1.22317	1.22464	1.22611	1.22611	1.22022	1.22611	1.22611	1.22906	1.23053	1.22169	1.23938	1.22464	1.22611	1.22169	1.22169	1.22464	1.23201	1.2158	1.22169	1.22906	1.22906	1.22022	1.2158	1.23053	1.22464	1.22464	1.22464	1.22169	1.22611	1.22317	1.22022
	4.8e-07	1.23938	1.23938	1.24085	1.23348	1.24085	1.23938	1.2379	1.23643	1.23053	1.23496	1.2379	1.23201	1.22906	1.23348	1.24232	1.23053	1.23643	1.23053	1.23496	1.23053	1.23938	1.2379	1.23938	1.23201	1.22906	1.23496	1.23496	1.23053	1.23496	1.2379	1.24232	1.23938	1.23201	1.23496	1.22906	1.23496	1.23643	1.22906	1.23643	1.23496	1.2438	1.22906	1.23053	1.23053	1.23496	1.23053	1.2379	1.24232
	4.85e-07	1.23496	1.24527	1.24085	1.24232	1.23938	1.2438	1.24085	1.24822	1.24232	1.24822	1.25706	1.24085	1.25411	1.24085	1.23643	1.24674	1.24085	1.24527	1.24674	1.2379	1.23938	1.2438	1.23643	1.24232	1.23938	1.24232	1.24527	1.23938	1.24232	1.2438	1.24822	1.24822	1.23938	1.24232	1.24674	1.24527	1.24527	1.24085	1.24232	1.24527	1.2438	1.24969	1.23938	1.2438	1.24674	1.24085	1.24085	1.24232
	4.9e-07	1.26148	1.24969	1.25264	1.26001	1.25116	1.25264	1.25411	1.2438	1.25264	1.24527	1.24527	1.24822	1.26001	1.25853	1.25411	1.25411	1.26001	1.25558	1.25264	1.25558	1.25706	1.24969	1.25853	1.26001	1.25411	1.25411	1.24969	1.25853	1.25264	1.24969	1.24822	1.25558	1.25558	1.25116	1.25116	1.25264	1.24969	1.26001	1.25116	1.24969	1.24085	1.24822	1.25706	1.25116	1.25853	1.25411	1.25706	1.25558
	4.95e-07	1.27032	1.26295	1.26295	1.26001	1.26737	1.27032	1.26443	1.26443	1.2659	1.27474	1.26295	1.27179	1.25853	1.25706	1.27032	1.25706	1.25706	1.25264	1.2659	1.26001	1.26737	1.26885	1.26885	1.26148	1.26295	1.27032	1.26885	1.26001	1.26737	1.26295	1.26885	1.25853	1.26148	1.26443	1.26001	1.25706	1.26885	1.26737	1.26001	1.25853	1.26885	1.25706	1.2659	1.26001	1.26001	1.2659	1.26885	1.26295
	5e-07	1.26885	1.28358	1.27474	1.27621	1.27474	1.27621	1.28211	1.28653	1.2659	1.27769	1.28063	1.27769	1.27179	1.28063	1.27179	1.27769	1.27621	1.27032	1.27179	1.27916	1.27769	1.27032	1.27179	1.27327	1.27621	1.28063	1.27474	1.28358	1.27769	1.28653	1.27916	1.28063	1.26885	1.28358	1.27769	1.28211	1.27327	1.27179	1.2659	1.27769	1.28063	1.27916	1.27474	1.27474	1.28358	1.27179	1.26885	1.27621
	5.05e-07	1.27916	1.28358	1.28948	1.28506	1.28063	1.28063	1.288	1.28506	1.28358	1.27769	1.288	1.28063	1.29095	1.28653	1.28506	1.29242	1.29242	1.29684	1.288	1.28358	1.28948	1.28653	1.28948	1.28063	1.27916	1.27769	1.2939	1.28211	1.28653	1.28653	1.288	1.28358	1.28211	1.28063	1.27916	1.28506	1.28506	1.28211	1.28653	1.28653	1.27916	1.29242	1.27769	1.28653	1.288	1.28948	1.28211	1.29242
	5.1e-07	1.29979	1.29537	1.29537	1.29684	1.29979	1.30126	1.28653	1.29979	1.30863	1.29242	1.29242	1.29979	1.29979	1.28948	1.30421	1.29684	1.29979	1.29684	1.30569	1.29684	1.29684	1.29979	1.29537	1.30421	1.30274	1.29979	1.2939	1.29684	1.2939	1.29832	1.28948	1.29537	1.30421	1.29537	1.30126	1.29684	1.30126	1.30569	1.29684	1.29537	1.29979	1.29537	1.29537	1.29537	1.29537	1.29832	1.30863	1.29537
	5.15e-07	1.31158	1.30421	1.29979	1.316	1.31158	1.30421	1.31305	1.30421	1.30126	1.316	1.30716	1.31011	1.30569	1.30716	1.316	1.30274	1.31011	1.30421	1.30716	1.30716	1.30716	1.30569	1.31011	1.316	1.31747	1.31747	1.30863	1.31011	1.30569	1.31158	1.31158	1.31011	1.31011	1.31158	1.31011	1.30716	1.31158	1.31011	1.30421	1.30421	1.31158	1.30863	1.30863	1.30569	1.31011	1.30863	1.30274	1.30421
	5.2e-07	1.32337	1.32631	1.32779	1.316	1.31305	1.31895	1.32337	1.32337	1.31158	1.32042	1.32042	1.31747	1.32484	1.33074	1.31453	1.32189	1.31453	1.32042	1.31453	1.32337	1.32337	1.31453	1.32337	1.31305	1.316	1.32042	1.32042	1.32337	1.32189	1.31747	1.32484	1.316	1.31747	1.32042	1.30863	1.31895	1.31747	1.32042	1.32042	1.31895	1.31895	1.32337	1.31747	1.31747	1.31305	1.31305	1.316	1.32484
	5.25e-07	1.32926	1.33516	1.3381	1.33074	1.33368	1.33663	1.33074	1.33663	1.33074	1.33516	1.34105	1.32926	1.33368	1.32631	1.33368	1.32337	1.33516	1.33368	1.3381	1.33368	1.33516	1.33958	1.33516	1.32926	1.32631	1.32779	1.33074	1.32484	1.33368	1.33516	1.3381	1.32926	1.32779	1.32779	1.32779	1.33074	1.32926	1.32779	1.32779	1.33958	1.33368	1.32779	1.33221	1.33368	1.34105	1.32779	1.3381	1.3381
	5.3e-07	1.344	1.33368	1.3381	1.34105	1.33958	1.344	1.34105	1.35431	1.34252	1.33958	1.34547	1.34547	1.34105	1.3381	1.34694	1.33958	1.34989	1.34989	1.34547	1.34252	1.3381	1.34547	1.33663	1.34989	1.34547	1.34252	1.34694	1.344	1.34105	1.34105	1.34252	1.35284	1.344	1.344	1.35284	1.34989	1.34252	1.344	1.34842	1.34105	1.33663	1.33958	1.34252	1.34105	1.34989	1.34989	1.35284	1.33958
	5.35e-07	1.36021	1.35579	1.35136	1.35726	1.35579	1.34842	1.36021	1.35284	1.35579	1.35284	1.34105	1.35431	1.35726	1.35136	1.35579	1.35431	1.34842	1.34989	1.35284	1.35136	1.35579	1.34252	1.36021	1.34989	1.35873	1.35726	1.35431	1.35726	1.34694	1.35726	1.34842	1.35284	1.35579	1.35726	1.35579	1.34989	1.35431	1.35726	1.35431	1.35136	1.35136	1.35284	1.35136	1.34694	1.344	1.35136	1.35136	1.34989
	5.4e-07	1.35873	1.36905	1.36905	1.36168	1.36905	1.37642	1.36757	1.37347	1.36463	1.36905	1.36757	1.36905	1.36021	1.36315	1.37199	1.36463	1.35431	1.36021	1.36168	1.37199	1.3661	1.35873	1.37789	1.36168	1.36463	1.36905	1.36315	1.36168	1.37199	1.3661	1.37199	1.36463	1.36021	1.36021	1.35431	1.35726	1.36905	1.36463	1.35579	1.36757	1.37199	1.3661	1.36757	1.37199	1.36168	1.35579	1.36315	1.36315
	5.45e-07	1.37789	1.36905	1.37642	1.37642	1.36757	1.38084	1.37347	1.38084	1.37052	1.37199	1.38084	1.37347	1.37642	1.37494	1.37494	1.37642	1.37789	1.37936	1.37642	1.38673	1.37347	1.37494	1.36905	1.37936	1.36757	1.37642	1.38231	1.37347	1.38231	1.37642	1.37936	1.37347	1.37642	1.37789	1.37494	1.38231	1.37494	1.36757	1.37789	1.37642	1.37347	1.38084	1.36905	1.37347	1.38673	1.37789	1.38084	1.37936
	5.5e-07	1.39115	1.38968	1.38526	1.38526	1.38378	1.38084	1.38526	1.38673	1.39115	1.38526	1.37642	1.38231	1.3941	1.38378	1.3941	1.38673	1.3882	1.38968	1.3882	1.38378	1.38084	1.38526	1.38673	1.38673	1.38968	1.38968	1.3882	1.38378	1.37789	1.38231	1.37789	1.38673	1.38231	1.38673	1.39115	1.38378	1.37642	1.38378	1.3941	1.38231	1.37936	1.38231	1.37936	1.38526	1.3882	1.3941	1.38526	1.3882
	5.55e-07	1.3941	1.39999	1.39999	1.39999	1.39999	1.39262	1.39557	1.39852	1.40294	1.39557	1.39115	1.40147	1.39557	1.39262	1.39999	1.38968	1.3941	1.39557	1.39557	1.39557	1.39704	1.3941	1.40294	1.39557	1.40589	1.40147	1.39704	1.39852	1.3941	1.39852	1.39115	1.39999	1.3941	1.39704	1.39262	1.39557	1.39999	1.40589	1.38378	1.39704	1.39704	1.39704	1.40294	1.39115	1.39115	1.39262	1.39852	1.39115
	5.6e-07	1.40294	1.39852	1.40294	1.40736	1.41325	1.40883	1.40883	1.40736	1.39557	1.40294	1.4162	1.41325	1.39557	1.40883	1.40147	1.40736	1.39999	1.39852	1.39852	1.41473	1.41325	1.39852	1.40441	1.40883	1.40589	1.40883	1.40589	1.40589	1.41178	1.41031	1.42062	1.40883	1.40883	1.41325	1.39999	1.40441	1.41325	1.39999	1.39999	1.41031	1.40736	1.40589	1.39557	1.40147	1.40294	1.40294	1.40147	1.40883
	5.65e-07	1.41325	1.41325	1.42062	1.41325	1.41767	1.41915	1.41325	1.42652	1.41325	1.41178	1.41767	1.41178	1.42357	1.42062	1.41915	1.42504	1.41767	1.4162	1.41767	1.4162	1.4162	1.42357	1.4162	1.40589	1.41473	1.41178	1.42062	1.41325	1.42209	1.4162	1.41915	1.41767	1.41473	1.41031	1.41915	1.41178	1.40736	1.4162	1.42209	1.4162	1.41325	1.42062	1.41473	1.42209	1.42209	1.41325	1.42062	1.42062
	5.7e-07	1.42799	1.43094	1.42799	1.42209	1.42504	1.42357	1.42652	1.42209	1.43388	1.42504	1.42652	1.42357	1.43388	1.42799	1.42652	1.42062	1.43683	1.43094	1.42652	1.42062	1.42652	1.42946	1.43094	1.43241	1.42504	1.42799	1.43094	1.41915	1.42062	1.42357	1.42209	1.42946	1.42652	1.41767	1.42799	1.43536	1.42504	1.42799	1.42652	1.42357	1.42504	1.42799	1.42946	1.42209	1.43241	1.42799	1.43241	1.42504
	5.75e-07	1.44272	1.42946	1.42799	1.4442	1.44272	1.43241	1.4383	1.43683	1.43388	1.43536	1.43241	1.4442	1.43094	1.4383	1.43978	1.4383	1.43388	1.43536	1.43241	1.44272	1.43388	1.42799	1.43536	1.4442	1.44272	1.4383	1.43388	1.4383	1.42799	1.43241	1.43536	1.43978	1.43683	1.44272	1.4383	1.43094	1.44272	1.43978	1.43241	1.43388	1.43388	1.42799	1.43683	1.43094	1.43388	1.43978	1.43683	1.43536
	5.8e-07	1.45451	1.45304	1.44714	1.43978	1.45009	1.45746	1.45304	1.45451	1.4442	1.45304	1.44714	1.44862	1.44862	1.44862	1.44272	1.45009	1.4442	1.4383	1.44862	1.44862	1.45009	1.44125	1.44567	1.4383	1.45157	1.44862	1.44272	1.44714	1.45157	1.45157	1.44567	1.44567	1.4442	1.44567	1.45009	1.44862	1.44272	1.45157	1.44125	1.44567	1.45451	1.44714	1.4442	1.44862	1.43978	1.44272	1.44272	1.45451
	5.85e-07	1.44862	1.45599	1.46041	1.44714	1.46188	1.45893	1.45157	1.46188	1.45599	1.45893	1.46041	1.45599	1.46041	1.45599	1.46335	1.45304	1.46188	1.46041	1.45893	1.45157	1.45893	1.46335	1.46335	1.45746	1.45599	1.45746	1.45304	1.45304	1.46041	1.46335	1.45451	1.46335	1.45451	1.45599	1.45304	1.45599	1.46188	1.45304	1.45451	1.46483	1.46041	1.46335	1.46041	1.46335	1.45746	1.45009	1.45599	1.46483
	5.9e-07	1.46483	1.45746	1.45746	1.4663	1.46335	1.4663	1.46925	1.47072	1.47072	1.45599	1.47072	1.46335	1.46777	1.4663	1.4663	1.4663	1.46483	1.46925	1.46188	1.4722	1.46041	1.4663	1.45599	1.4722	1.46925	1.46777	1.46777	1.45746	1.46188	1.46335	1.46188	1.47072	1.46925	1.46483	1.47072	1.47514	1.46483	1.4722	1.47072	1.4663	1.46188	1.4722	1.4663	1.46041	1.46777	1.4663	1.47662	1.46335
	5.95e-07	1.48104	1.47514	1.47809	1.47956	1.48104	1.48104	1.47809	1.47367	1.47662	1.48398	1.47072	1.48104	1.48104	1.47514	1.48398	1.47367	1.4722	1.47367	1.48251	1.47956	1.4722	1.47662	1.48104	1.47072	1.47662	1.48546	1.4722	1.47514	1.47072	1.47514	1.47956	1.4722	1.47956	1.48251	1.48546	1.47809	1.47514	1.48693	1.47367	1.46777	1.47072	1.46335	1.47072	1.47514	1.47662	1.48398	1.46777	1.47367
	6e-07	1.48104	1.49872	1.48988	1.48398	1.4884	1.4884	1.4884	1.48398	1.48104	1.49577	1.48104	1.4943	1.4884	1.48546	1.49282	1.48251	1.48398	1.48104	1.48104	1.48693	1.49135	1.48104	1.49577	1.48104	1.47809	1.48988	1.47809	1.48398	1.49135	1.49135	1.49135	1.48546	1.48104	1.48398	1.48546	1.48104	1.48546	1.47956	1.47809	1.48398	1.4943	1.48546	1.4884	1.48988	1.48104	1.47514	1.48546	1.4884
	6.05e-07	1.49282	1.49872	1.49135	1.4943	1.48988	1.49872	1.49725	1.49872	1.49135	1.49282	1.50314	1.48988	1.4943	1.49872	1.49135	1.49725	1.49135	1.50019	1.48988	1.50167	1.49282	1.49872	1.48693	1.50756	1.48988	1.49135	1.48546	1.49282	1.4943	1.4943	1.49577	1.4943	1.48988	1.4943	1.49577	1.49872	1.50019	1.49282	1.49577	1.50609	1.49282	1.50461	1.4884	1.4943	1.4943	1.49282	1.49872	1.49577
	6.1e-07	1.50167	1.4884	1.50756	1.50314	1.50609	1.50167	1.49725	1.50314	1.50903	1.50461	1.50314	1.49872	1.50756	1.49872	1.51051	1.50609	1.51198	1.50756	1.51345	1.50314	1.50167	1.51198	1.49872	1.50903	1.51051	1.50019	1.50756	1.50167	1.50609	1.50461	1.50019	1.51345	1.51787	1.50167	1.51198	1.50167	1.50461	1.51493	1.50461	1.50314	1.50019	1.50019	1.50609	1.50756	1.50903	1.5164	1.50461	1.50609
	6.15e-07	1.5164	1.51345	1.51051	1.51787	1.5164	1.50756	1.51198	1.51345	1.5164	1.52082	1.51051	1.51935	1.51787	1.5164	1.52524	1.50903	1.51787	1.50903	1.51345	1.51345	1.51787	1.50756	1.5223	1.51198	1.51787	1.5223	1.51935	1.51198	1.51345	1.51787	1.51198	1.51493	1.51198	1.51051	1.51787	1.52082	1.51345	1.51935	1.51051	1.50756	1.52082	1.50903	1.52082	1.5164	1.51345	1.51345	1.51345	1.50756
	6.2e-07	1.52672	1.53556	1.52524	1.52377	1.52819	1.52819	1.53261	1.53408	1.52377	1.52377	1.52966	1.52819	1.52082	1.52672	1.52377	1.52672	1.51493	1.52819	1.51787	1.52819	1.52377	1.5223	1.52672	1.53114	1.5223	1.53114	1.51051	1.52966	1.52524	1.53114	1.53114	1.51935	1.51935	1.53114	1.52082	1.51493	1.53114	1.53114	1.51935	1.52377	1.52966	1.52524	1.52082	1.52524	1.52082	1.5164	1.52524	1.52819
	6.25e-07	1.53556	1.53408	1.54145	1.53703	1.53261	1.53998	1.53703	1.53408	1.53703	1.53114	1.52966	1.53408	1.5385	1.53703	1.52966	1.53408	1.5385	1.53998	1.53556	1.54293	1.5385	1.54293	1.53114	1.53114	1.53408	1.53556	1.53114	1.53114	1.54145	1.5385	1.53998	1.53408	1.54145	1.53114	1.53556	1.53998	1.53703	1.52819	1.53408	1.53556	1.5385	1.5385	1.53408	1.53556	1.54293	1.53261	1.53408	1.53261
	6.3e-07	1.53703	1.54587	1.54293	1.5444	1.53556	1.54145	1.53998	1.53998	1.54293	1.55029	1.54587	1.54145	1.55029	1.5444	1.55029	1.5385	1.5444	1.54293	1.55766	1.5385	1.54587	1.54735	1.5444	1.5444	1.5444	1.5444	1.54587	1.53556	1.5444	1.54735	1.53556	1.54587	1.54145	1.53998	1.54735	1.54145	1.54293	1.5385	1.54587	1.53703	1.54145	1.54882	1.54882	1.54587	1.54587	1.54882	1.54735	1.54293
	6.35e-07	1.55766	1.55766	1.54587	1.55177	1.55029	1.55029	1.55177	1.55324	1.55913	1.55029	1.55471	1.55913	1.54882	1.55619	1.55619	1.55619	1.55324	1.55177	1.54735	1.54882	1.54882	1.55029	1.55177	1.56208	1.55619	1.55913	1.54293	1.55766	1.54587	1.54587	1.55029	1.54882	1.54587	1.55619	1.55177	1.54587	1.55177	1.56208	1.55324	1.55471	1.55324	1.55766	1.55324	1.54882	1.55177	1.55324	1.54882	1.55177
	6.4e-07	1.56503	1.56355	1.56503	1.5665	1.56798	1.56503	1.57092	1.56355	1.56945	1.56798	1.56208	1.5724	1.56503	1.57092	1.55619	1.5665	1.56061	1.55766	1.56208	1.56798	1.57092	1.56503	1.56061	1.55766	1.55913	1.56061	1.56208	1.5665	1.56945	1.5665	1.56503	1.55913	1.56945	1.56798	1.5665	1.57092	1.56798	1.56208	1.55177	1.56355	1.56503	1.56208	1.56355	1.56208	1.55324	1.56061	1.56208	1.5665
	6.45e-07	1.56503	1.56945	1.57534	1.56945	1.57387	1.57534	1.57092	1.57534	1.57534	1.57387	1.57682	1.57092	1.57829	1.57534	1.57534	1.58124	1.56945	1.56798	1.57976	1.57092	1.56945	1.57682	1.57829	1.56355	1.58271	1.57682	1.57534	1.57534	1.57682	1.5724	1.57092	1.57092	1.5724	1.5665	1.5665	1.57092	1.57829	1.56945	1.57829	1.57534	1.57682	1.57682	1.5665	1.58271	1.57976	1.56945	1.57387	1.57387
	6.5e-07	1.58124	1.58566	1.57682	1.57976	1.5724	1.57976	1.57829	1.57976	1.58418	1.57976	1.5886	1.5724	1.58271	1.58124	1.58271	1.58271	1.58713	1.59008	1.58271	1.57534	1.57682	1.58713	1.57092	1.5886	1.58271	1.58418	1.57829	1.57682	1.57976	1.58124	1.58124	1.5886	1.57387	1.57829	1.58566	1.58124	1.57829	1.57976	1.5886	1.5886	1.58124	1.58271	1.58418	1.57829	1.58713	1.58566	1.58566	1.58418
	6.55e-07	1.59303	1.58713	1.58713	1.59597	1.59597	1.5886	1.59597	1.58418	1.58713	1.58713	1.57976	1.58713	1.58566	1.59155	1.5886	1.57976	1.58713	1.59008	1.59597	1.59155	1.59008	1.58418	1.58566	1.59155	1.59008	1.57976	1.58713	1.5886	1.58418	1.58713	1.58713	1.58713	1.59155	1.58566	1.5945	1.59008	1.58566	1.59008	1.58418	1.58124	1.58271	1.58566	1.58713	1.58566	1.58418	1.59155	1.59008	1.58271
	6.6e-07	1.59597	1.60334	1.59008	1.59303	1.59745	1.59745	1.5945	1.59745	1.59745	1.59892	1.59892	1.60334	1.59597	1.59597	1.59008	1.5945	1.5886	1.58124	1.59303	1.59745	1.60187	1.59155	1.59892	1.58271	1.59745	1.60334	1.59745	1.59597	1.59892	1.59745	1.59303	1.59008	1.59008	1.60334	1.59008	1.59597	1.60039	1.59155	1.59597	1.5945	1.61071	1.59892	1.59745	1.59745	1.59745	1.59303	1.5886	1.59892
	6.65e-07	1.60039	1.59745	1.59892	1.59745	1.59303	1.60187	1.59155	1.60776	1.5945	1.5945	1.60923	1.60187	1.59892	1.60039	1.59745	1.60187	1.59892	1.59892	1.60039	1.59597	1.59155	1.60776	1.59303	1.60334	1.59597	1.59892	1.5886	1.59745	1.59303	1.59597	1.60481	1.59745	1.58566	1.59155	1.59303	1.59155	1.59892	1.59892	1.59597	1.60334	1.59303	1.60481	1.59597	1.60187	1.59892	1.59745	1.59892	1.60776
	6.7e-07	1.59892	1.59892	1.59745	1.60334	1.61071	1.59892	1.60187	1.60039	1.60923	1.59745	1.59597	1.59597	1.60187	1.60481	1.60481	1.59303	1.60187	1.60923	1.60629	1.60776	1.59892	1.60187	1.5886	1.60334	1.60334	1.59155	1.60481	1.59745	1.60629	1.59597	1.59597	1.60629	1.61071	1.59303	1.60039	1.60776	1.59303	1.60481	1.60334	1.59597	1.60187	1.60334	1.59303	1.5945	1.60776	1.60629	1.60923	1.59745
	6.75e-07	1.60334	1.60039	1.60334	1.60629	1.60187	1.60187	1.60187	1.59745	1.60776	1.60187	1.60187	1.60776	1.60334	1.60039	1.60187	1.60334	1.60481	1.59745	1.60187	1.60334	1.60481	1.60334	1.61218	1.60334	1.61218	1.60629	1.60923	1.60334	1.60039	1.60629	1.59597	1.60039	1.60481	1.60923	1.60481	1.60629	1.60334	1.60187	1.60481	1.59745	1.60629	1.60039	1.60923	1.60039	1.60481	1.59892	1.60039	1.59597
	6.8e-07	1.60923	1.60923	1.60039	1.59892	1.60039	1.60334	1.59892	1.61071	1.60187	1.60481	1.60923	1.60481	1.59892	1.60776	1.59745	1.60629	1.59303	1.60187	1.59745	1.59745	1.60481	1.60187	1.60481	1.60481	1.60629	1.60776	1.59745	1.60776	1.60039	1.61218	1.61071	1.59745	1.5886	1.59745	1.60039	1.59745	1.60923	1.60629	1.60039	1.60187	1.60629	1.60776	1.60187	1.60776	1.59892	1.60481	1.59597	1.61218
	6.85e-07	1.59745	1.60776	1.60776	1.60923	1.60629	1.60334	1.60923	1.60334	1.60039	1.60776	1.60776	1.59597	1.60481	1.60776	1.59892	1.60334	1.60039	1.60776	1.61513	1.60629	1.60776	1.60334	1.60481	1.60629	1.59892	1.59008	1.60629	1.60481	1.60923	1.60776	1.60481	1.60039	1.60187	1.60187	1.60187	1.60629	1.60334	1.60187	1.60481	1.61071	1.60776	1.60334	1.60334	1.60334	1.60776	1.60039	1.60923	1.61218
	6.9e-07	1.60481	1.60334	1.60923	1.60187	1.60334	1.60776	1.60039	1.60039	1.60923	1.60334	1.60481	1.60187	1.60923	1.60629	1.60629	1.60481	1.60923	1.60629	1.61071	1.60923	1.61218	1.61366	1.60629	1.60481	1.60481	1.60629	1.60923	1.60334	1.60923	1.60187	1.59745	1.60629	1.61366	1.60776	1.61366	1.60629	1.60187	1.60776	1.60629	1.59597	1.60923	1.60923	1.60923	1.60334	1.60923	1.60629	1.61218	1.60187
	6.95e-07	1.60776	1.60481	1.59597	1.60334	1.59597	1.60039	1.59597	1.60039	1.60334	1.59745	1.60776	1.60776	1.59745	1.60187	1.60629	1.60481	1.60039	1.60187	1.60187	1.59155	1.60629	1.60039	1.60481	1.61513	1.61071	1.61513	1.59892	1.60629	1.59892	1.60334	1.60629	1.60776	1.59745	1.60187	1.59892	1.60039	1.60481	1.60923	1.60629	1.60039	1.60039	1.60629	1.60776	1.59597	1.60039	1.60776	1.59155	1.60039
	7e-07	1.60187	1.60039	1.60334	1.60776	1.61071	1.59745	1.61366	1.60187	1.60334	1.60776	1.60187	1.60629	1.59745	1.60776	1.60039	1.60039	1.60039	1.60481	1.60334	1.60039	1.60629	1.59745	1.59745	1.60334	1.59892	1.5945	1.59892	1.60334	1.60187	1.60629	1.60334	1.59892	1.60039	1.59892	1.60187	1.59892	1.60187	1.61071	1.59155	1.59892	1.60481	1.60039	1.60187	1.60334	1.59597	1.5945	1.60334	1.60039
	7.05e-07	1.59892	1.61071	1.60481	1.60039	1.60039	1.60776	1.60334	1.60187	1.5945	1.60187	1.60629	1.5945	1.60481	1.61071	1.59597	1.60187	1.59892	1.59745	1.60629	1.61071	1.60481	1.60187	1.60039	1.59303	1.60039	1.60039	1.60923	1.59745	1.61513	1.60334	1.59892	1.59008	1.60187	1.60629	1.59745	1.60629	1.60334	1.59303	1.60187	1.60334	1.61218	1.60334	1.59892	1.60039	1.61071	1.59745	1.60481	1.60039
	7.1e-07	1.59892	1.59892	1.59597	1.59008	1.59892	1.60187	1.59597	1.60187	1.60039	1.59155	1.60629	1.60039	1.60334	1.59745	1.61071	1.60334	1.60923	1.60039	1.60334	1.5945	1.60187	1.60629	1.60039	1.61071	1.60187	1.60039	1.60039	1.59597	1.59303	1.60481	1.60923	1.60923	1.59303	1.59303	1.5945	1.59597	1.59892	1.59745	1.60334	1.60481	1.59303	1.61071	1.59597	1.60629	1.60334	1.60629	1.59008	1.60629
	7.15e-07	1.60039	1.60039	1.59155	1.60776	1.59008	1.58271	1.5945	1.59008	1.60039	1.59892	1.59597	1.60629	1.5945	1.59892	1.59892	1.59597	1.59303	1.60039	1.59597	1.5945	1.59597	1.59597	1.5945	1.60629	1.60187	1.59597	1.5945	1.59892	1.59892	1.59155	1.59155	1.59892	1.60187	1.59892	1.60334	1.59745	1.59745	1.60629	1.5945	1.58418	1.60187	1.59597	1.60481	1.58418	1.59303	1.59745	1.60334	1.59303
	7.2e-07	1.59892	1.60334	1.59892	1.59597	1.60039	1.60334	1.59745	1.59597	1.5886	1.60039	1.59745	1.59303	1.5945	1.5945	1.59303	1.5886	1.59745	1.59155	1.59892	1.60039	1.59892	1.5886	1.59745	1.58271	1.60187	1.59745	1.59892	1.59597	1.60481	1.60039	1.5886	1.59008	1.59597	1.60481	1.5945	1.5945	1.5945	1.59597	1.59597	1.60039	1.60334	1.59008	1.59597	1.59303	1.59597	1.59008	1.5945	1.60334
	7.25e-07	1.59155	1.5945	1.5945	1.5886	1.59892	1.60187	1.59155	1.59745	1.59745	1.59008	1.60187	1.60039	1.59155	1.60187	1.59008	1.60039	1.59008	1.5886	1.59745	1.59892	1.60334	1.59597	1.58713	1.5945	1.59155	1.59303	1.59303	1.59745	1.59008	1.60187	1.60481	1.59008	1.58566	1.5886	1.5886	1.5945	1.59745	1.59155	1.5886	1.59597	1.59745	1.60039	1.59155	1.60334	1.59597	1.59892	1.59155	1.60187
	7.3e-07	1.59155	1.59008	1.59008	1.5945	1.58713	1.5886	1.59155	1.59155	1.59155	1.5886	1.59303	1.58566	1.59892	1.58713	1.5886	1.5945	1.5945	1.60039	1.59008	1.5886	1.59008	1.59155	1.5945	1.59892	1.59155	1.58566	1.59008	1.59155	1.59597	1.5886	1.59597	1.60187	1.59745	1.58713	1.59008	1.59597	1.58566	1.5945	1.60481	1.59008	1.5886	1.60481	1.59597	1.58713	1.59745	1.59008	1.60187	1.59008
	7.35e-07	1.59597	1.59008	1.59008	1.60187	1.59155	1.5886	1.59155	1.58566	1.59597	1.59745	1.59008	1.59597	1.59155	1.59008	1.59892	1.5886	1.59303	1.5886	1.59892	1.59597	1.5945	1.60039	1.5945	1.59155	1.59597	1.59303	1.59892	1.59008	1.5886	1.59745	1.57829	1.59303	1.59745	1.5945	1.60039	1.59745	1.58418	1.60629	1.58566	1.5886	1.5945	1.5886	1.59155	1.58271	1.59597	1.5945	1.5945	1.59303
	7.4e-07	1.59745	1.59745	1.59155	1.58713	1.59008	1.59008	1.59745	1.59745	1.59155	1.59303	1.59155	1.60039	1.58566	1.59745	1.59155	1.59155	1.5945	1.59008	1.58566	1.59597	1.59892	1.59155	1.5945	1.5886	1.59008	1.59745	1.5886	1.59597	1.5886	1.59303	1.60039	1.5886	1.58566	1.59303	1.58566	1.58713	1.60334	1.59155	1.59597	1.58418	1.59597	1.58271	1.5886	1.59008	1.58566	1.59155	1.58271	1.59303
	7.45e-07	1.58566	1.5886	1.59303	1.5945	1.59597	1.59892	1.58713	1.5886	1.59008	1.58418	1.5945	1.58124	1.5886	1.59155	1.58713	1.5945	1.58713	1.59155	1.58566	1.58566	1.60187	1.59155	1.59155	1.59303	1.58566	1.5886	1.5886	1.59155	1.59008	1.59303	1.59303	1.5945	1.58713	1.5886	1.58566	1.59008	1.59008	1.5886	1.59008	1.5945	1.59155	1.60629	1.5945	1.59745	1.5886	1.58418	1.59597	1.59155
	7.5e-07	1.59008	1.59155	1.5886	1.59892	1.58271	1.58566	1.59155	1.58566	1.59303	1.59303	1.59155	1.59008	1.59892	1.59155	1.5886	1.59303	1.58418	1.59155	1.60039	1.59008	1.59008	1.60039	1.58713	1.59155	1.59745	1.58566	1.60629	1.58418	1.59745	1.59008	1.57976	1.59008	1.59745	1.58713	1.59597	1.60334	1.57534	1.59892	1.58418	1.59008	1.59303	1.5945	1.58713	1.59008	1.60039	1.5945	1.60187	1.59303
	7.55e-07	1.59892	1.58566	1.58713	1.58566	1.5886	1.59155	1.58418	1.59008	1.5945	1.5886	1.59155	1.59008	1.5886	1.58566	1.60187	1.58713	1.59892	1.5886	1.59597	1.58418	1.58713	1.59008	1.59745	1.5886	1.5886	1.59745	1.59303	1.59008	1.57682	1.59008	1.59155	1.59597	1.5886	1.5886	1.59155	1.58418	1.59303	1.59303	1.59008	1.5886	1.58566	1.58713	1.59008	1.58713	1.59155	1.58713	1.58566	1.58566
	7.6e-07	1.59303	1.60039	1.59008	1.60039	1.59597	1.59597	1.59303	1.59155	1.59303	1.5886	1.58566	1.59303	1.58713	1.59155	1.59008	1.5886	1.58566	1.58713	1.58124	1.59597	1.60039	1.58566	1.5945	1.59008	1.58566	1.59597	1.58124	1.59597	1.58124	1.58713	1.5945	1.59155	1.58713	1.59303	1.58566	1.58713	1.59597	1.59303	1.59008	1.58271	1.59892	1.59303	1.59155	1.58418	1.57682	1.58566	1.59155	1.58124
	7.65e-07	1.59155	1.59597	1.5886	1.59008	1.59008	1.5945	1.60039	1.59745	1.58124	1.59155	1.5945	1.5945	1.5945	1.59008	1.58418	1.59745	1.58418	1.59303	1.58713	1.59303	1.5886	1.5945	1.59303	1.58124	1.5945	1.58713	1.59745	1.59008	1.60187	1.59597	1.58418	1.58418	1.59303	1.5886	1.59008	1.5945	1.57829	1.5945	1.58566	1.5945	1.59008	1.58271	1.58124	1.5886	1.59597	1.5945	1.5945	1.60039
	7.7e-07	1.58566	1.57976	1.59303	1.58418	1.58713	1.59155	1.57534	1.58418	1.5945	1.58713	1.59745	1.58566	1.59008	1.59155	1.59008	1.58418	1.60187	1.59008	1.60776	1.58566	1.58713	1.59892	1.58566	1.59008	1.57829	1.59008	1.59745	1.58418	1.5886	1.59155	1.59597	1.59008	1.59008	1.58713	1.5945	1.59597	1.59303	1.58418	1.58713	1.58713	1.59008	1.60187	1.59303	1.58713	1.59892	1.59008	1.58713	1.58713
	7.75e-07	1.59303	1.5945	1.57976	1.59597	1.59155	1.58713	1.58418	1.59008	1.59745	1.59155	1.57976	1.5945	1.58713	1.59008	1.59597	1.58566	1.58418	1.59008	1.58418	1.58713	1.5886	1.59008	1.59155	1.59303	1.59745	1.58418	1.58124	1.59008	1.58271	1.58271	1.59008	1.59745	1.5886	1.58713	1.58713	1.58713	1.5886	1.60187	1.59745	1.58566	1.5886	1.59303	1.59597	1.58713	1.58271	1.59303	1.59892	1.57976
	7.8e-07	1.59597	1.5945	1.59303	1.59892	1.5945	1.59303	1.60481	1.5945	1.5886	1.59008	1.5945	1.5945	1.5886	1.59008	1.5945	1.5945	1.58418	1.59155	1.59155	1.5886	1.59745	1.59008	1.60039	1.58566	1.59745	1.60187	1.59597	1.59892	1.59745	1.59597	1.59008	1.58566	1.59303	1.59745	1.59303	1.59008	1.59155	1.59745	1.57682	1.58566	1.60187	1.59008	1.59008	1.58124	1.59008	1.58713	1.59597	1.59303
	7.85e-07	1.59008	1.59597	1.60039	1.58124	1.59303	1.5945	1.59008	1.59303	1.5886	1.5886	1.60039	1.58124	1.59597	1.58713	1.58124	1.59008	1.59303	1.58713	1.60039	1.59892	1.59155	1.59597	1.59303	1.58566	1.58713	1.59155	1.59892	1.59155	1.5945	1.59745	1.60481	1.5886	1.57829	1.58418	1.59303	1.59155	1.60039	1.58566	1.58713	1.59597	1.59008	1.5945	1.58566	1.5945	1.60187	1.58713	1.58418	1.59597
	7.9e-07	1.58713	1.59008	1.59155	1.59155	1.59155	1.5945	1.57829	1.59745	1.59155	1.58418	1.58124	1.59155	1.59008	1.59008	1.59597	1.59303	1.59303	1.59892	1.59303	1.58566	1.59155	1.59597	1.58271	1.59597	1.58271	1.59008	1.58566	1.58713	1.58566	1.59155	1.59008	1.59745	1.5945	1.58713	1.59155	1.5945	1.58713	1.59008	1.59892	1.59155	1.59008	1.59597	1.5886	1.5886	1.58713	1.5886	1.59892	1.58418
	7.95e-07	1.60334	1.5886	1.58418	1.60039	1.58713	1.5886	1.59745	1.59155	1.60187	1.5945	1.5945	1.59892	1.59597	1.5945	1.59892	1.59155	1.5886	1.59303	1.5945	1.59303	1.58566	1.59303	1.5945	1.59303	1.59892	1.58566	1.59892	1.58418	1.59008	1.59008	1.58418	1.60187	1.59303	1.59597	1.59597	1.59155	1.58566	1.59892	1.5886	1.59155	1.59008	1.59008	1.5945	1.58713	1.59008	1.60039	1.59597	1.59745
	8e-07	1.59745	1.60187	1.59155	1.59303	1.60039	1.59008	1.59892	1.59008	1.5886	1.59745	1.59597	1.59155	1.5886	1.5886	1.59597	1.58713	1.59008	1.58713	1.59155	1.59303	1.59597	1.59155	1.60039	1.58271	1.59745	1.60481	1.59892	1.59597	1.58713	1.5945	1.59597	1.5886	1.58566	1.59155	1.59597	1.59155	1.60629	1.59597	1.58271	1.59155	1.59597	1.58418	1.59008	1.59745	1.59303	1.58713	1.58713	1.59155
	8.05e-07	1.58713	1.60187	1.60334	1.58713	1.59892	1.60039	1.58566	1.60334	1.59008	1.5886	1.5886	1.5886	1.57829	1.59008	1.5886	1.59303	1.58566	1.59008	1.59155	1.60334	1.59155	1.59008	1.58713	1.59008	1.5886	1.59597	1.58566	1.59155	1.5945	1.59745	1.60334	1.59155	1.59008	1.59745	1.5886	1.58271	1.59008	1.58713	1.59155	1.59303	1.59597	1.59892	1.59008	1.59597	1.59008	1.59008	1.59155	1.59008
	8.1e-07	1.5945	1.59008	1.5945	1.60187	1.58124	1.5886	1.60039	1.60187	1.59597	1.59745	1.60187	1.59303	1.60923	1.59745	1.60039	1.59892	1.5945	1.60481	1.5945	1.59008	1.59303	1.59892	1.5945	1.59303	1.59597	1.58271	1.60481	1.58713	1.59892	1.59745	1.59155	1.59745	1.59745	1.59155	1.59745	1.60334	1.58124	1.60039	1.59745	1.59745	1.59008	1.5886	1.59008	1.59008	1.60334	1.60039	1.60776	1.60334
	8.15e-07	1.59892	1.58713	1.59303	1.5945	1.5945	1.5886	1.59303	1.58713	1.59155	1.59303	1.60187	1.59008	1.60039	1.58566	1.60334	1.58418	1.5945	1.59597	1.60187	1.59155	1.59155	1.59597	1.59745	1.59892	1.59892	1.59892	1.60039	1.5945	1.58566	1.5945	1.59597	1.60039	1.5886	1.58271	1.60039	1.59008	1.60334	1.5945	1.59008	1.59155	1.59008	1.59155	1.59892	1.5945	1.59597	1.5886	1.59155	1.59745
	8.2e-07	1.59597	1.60629	1.59597	1.59155	1.60481	1.59745	1.59008	1.59303	1.5945	1.59597	1.58418	1.5945	1.59008	1.59155	1.60187	1.58566	1.5945	1.59303	1.59303	1.60039	1.60187	1.59155	1.59597	1.5945	1.59745	1.59597	1.59745	1.59892	1.59597	1.59303	1.60481	1.5945	1.59155	1.60629	1.59008	1.59155	1.59745	1.5945	1.59008	1.5886	1.59597	1.59597	1.5945	1.59303	1.58418	1.5945	1.59008	1.59155
	8.25e-07	1.59303	1.59303	1.59597	1.59892	1.59008	1.60629	1.60039	1.60334	1.59892	1.59892	1.60776	1.60039	1.59597	1.61071	1.59745	1.61071	1.59745	1.59745	1.59008	1.60334	1.59597	1.59892	1.59892	1.59155	1.59745	1.60187	1.59303	1.59745	1.60629	1.60481	1.59303	1.59008	1.5886	1.59745	1.59303	1.60039	1.5945	1.59745	1.59892	1.59597	1.5886	1.59303	1.59008	1.59892	1.60629	1.59892	1.59597	1.60481
	8.3e-07	1.59892	1.5945	1.59597	1.5886	1.59155	1.59597	1.59745	1.59892	1.59892	1.59745	1.60481	1.59008	1.60481	1.59303	1.60039	1.60039	1.60039	1.60187	1.60039	1.60334	1.59745	1.60039	1.59155	1.59597	1.59892	1.5945	1.60039	1.58713	1.59597	1.59745	1.60187	1.59892	1.59597	1.5886	1.59303	1.60039	1.59745	1.59597	1.59745	1.59745	1.59597	1.60481	1.5945	1.60334	1.60039	1.5945	1.60039	1.60481
	8.35e-07	1.59892	1.60039	1.5945	1.60187	1.60039	1.5945	1.5886	1.59303	1.59597	1.59008	1.58418	1.59745	1.5945	1.59155	1.60039	1.5886	1.60187	1.59745	1.60187	1.59155	1.60187	1.59745	1.59597	1.60187	1.59892	1.60481	1.59892	1.59155	1.59008	1.5945	1.59597	1.60923	1.59745	1.59597	1.60334	1.5945	1.59303	1.60187	1.59745	1.59155	1.59008	1.59892	1.60187	1.5886	1.5886	1.59745	1.59892	1.59303
	8.4e-07	1.60776	1.5945	1.59745	1.60187	1.60039	1.60039	1.60776	1.60629	1.59745	1.61071	1.59597	1.60629	1.59303	1.59892	1.60481	1.60481	1.5945	1.59745	1.59892	1.60187	1.59892	1.59597	1.60481	1.59597	1.60039	1.60187	1.59303	1.60187	1.60629	1.60481	1.60187	1.60334	1.5945	1.60923	1.59745	1.60187	1.60187	1.60039	1.59745	1.59892	1.60187	1.5945	1.60039	1.59303	1.59892	1.60776	1.59892	1.5945
	8.45e-07	1.59597	1.60334	1.60334	1.59745	1.59745	1.60334	1.60039	1.60629	1.5886	1.60334	1.60481	1.59745	1.60481	1.60629	1.60039	1.60629	1.60039	1.60481	1.59892	1.60187	1.60629	1.59745	1.60334	1.5945	1.60334	1.60187	1.60187	1.60187	1.60334	1.60039	1.60629	1.59597	1.59008	1.60039	1.59892	1.59597	1.60923	1.59597	1.59597	1.59892	1.60039	1.59745	1.60187	1.60776	1.60187	1.59008	1.5945	1.60629
	8.5e-07	1.58713	1.60187	1.59303	1.58418	1.60187	1.59155	1.5886	1.5886	1.59303	1.58566	1.58566	1.58566	1.59008	1.59008	1.5945	1.58713	1.59745	1.5886	1.59892	1.59892	1.58418	1.59008	1.58418	1.59303	1.58713	1.59155	1.5886	1.5886	1.58713	1.58713	1.58713	1.59597	1.59745	1.5886	1.5945	1.5886	1.58566	1.5886	1.59155	1.5945	1.59303	1.60039	1.58566	1.59892	1.5886	1.58713	1.59303	1.59597
	8.55e-07	1.58418	1.57534	1.57534	1.58124	1.56503	1.57534	1.57829	1.57976	1.59008	1.58271	1.57387	1.58418	1.58124	1.57829	1.58418	1.58418	1.58566	1.58124	1.57534	1.57534	1.56945	1.58124	1.58271	1.57976	1.58124	1.57682	1.58566	1.57534	1.58271	1.57829	1.57829	1.58271	1.58713	1.58124	1.57976	1.58713	1.57682	1.58713	1.58124	1.58124	1.5724	1.58124	1.58271	1.57829	1.57829	1.59008	1.5886	1.57092
	8.6e-07	1.56798	1.56061	1.5665	1.56798	1.56945	1.56208	1.56945	1.56355	1.56503	1.5724	1.56208	1.56355	1.56945	1.56355	1.5665	1.56355	1.56945	1.56355	1.56061	1.56208	1.5724	1.56208	1.5665	1.55766	1.57387	1.5665	1.56503	1.56208	1.55766	1.56355	1.56503	1.56503	1.56061	1.56061	1.56945	1.55766	1.57534	1.5665	1.55913	1.56061	1.56798	1.55913	1.56798	1.56208	1.56355	1.56061	1.55766	1.5665
	8.65e-07	1.5385	1.54735	1.5444	1.53114	1.54882	1.5444	1.54587	1.54587	1.52672	1.53408	1.53556	1.53703	1.52966	1.54145	1.5444	1.53703	1.53703	1.53114	1.53998	1.5444	1.54587	1.53556	1.5385	1.5385	1.52966	1.54145	1.53408	1.5385	1.54293	1.53703	1.5444	1.53114	1.53556	1.53703	1.53408	1.53556	1.53703	1.53261	1.5385	1.53703	1.53703	1.54145	1.53703	1.54293	1.53556	1.52966	1.53703	1.54587
	8.7e-07	1.50903	1.50756	1.51198	1.50903	1.50167	1.50756	1.51493	1.51493	1.50756	1.51051	1.51051	1.50461	1.51493	1.51198	1.50756	1.51345	1.51198	1.51787	1.51051	1.51345	1.50019	1.51198	1.51198	1.50903	1.50756	1.50461	1.51198	1.50314	1.51787	1.50461	1.51051	1.51198	1.51051	1.51493	1.50756	1.51787	1.50756	1.51051	1.51493	1.51345	1.50314	1.51345	1.50756	1.50903	1.50903	1.51051	1.51198	1.50019
	8.75e-07	1.47072	1.46925	1.47514	1.47367	1.47367	1.4722	1.4663	1.47367	1.48251	1.48104	1.4722	1.47514	1.47662	1.47514	1.48398	1.47072	1.48693	1.47809	1.48251	1.47072	1.4722	1.48104	1.46777	1.47367	1.48398	1.46925	1.47367	1.4722	1.47809	1.46925	1.47514	1.47809	1.47662	1.46777	1.47662	1.47956	1.47956	1.47514	1.4722	1.47662	1.47956	1.48104	1.47809	1.47809	1.48104	1.47956	1.47514	1.47809
	8.8e-07	1.44125	1.44567	1.43536	1.4383	1.43978	1.43388	1.4383	1.43241	1.43241	1.43683	1.42799	1.4442	1.43388	1.43683	1.4442	1.42946	1.43978	1.43094	1.4383	1.44272	1.44272	1.43388	1.45157	1.43978	1.43388	1.44567	1.43536	1.4383	1.42799	1.44714	1.43978	1.43683	1.43978	1.4383	1.43683	1.42946	1.4383	1.44567	1.43241	1.42652	1.43241	1.43094	1.44125	1.44567	1.42946	1.43388	1.43683	1.43978
	8.85e-07	1.39852	1.40589	1.40294	1.39557	1.40294	1.40883	1.40883	1.39852	1.39999	1.39999	1.40441	1.39852	1.40294	1.41031	1.39852	1.40736	1.39704	1.39704	1.3941	1.40294	1.40294	1.39557	1.39999	1.3941	1.39557	1.40147	1.39999	1.39999	1.40441	1.40294	1.40294	1.39704	1.3941	1.40147	1.39262	1.39557	1.3941	1.40147	1.39704	1.39557	1.40294	1.40147	1.39704	1.39999	1.39557	1.39852	1.39557	1.39852
	8.9e-07	1.36168	1.35726	1.36463	1.35579	1.35873	1.36168	1.35726	1.36315	1.36021	1.36463	1.36463	1.35284	1.3661	1.36168	1.35579	1.36463	1.37052	1.37642	1.36463	1.35431	1.36021	1.36463	1.35579	1.35431	1.36021	1.35431	1.36315	1.36315	1.3661	1.36168	1.36463	1.3661	1.36021	1.35726	1.36463	1.35873	1.36905	1.35873	1.3661	1.37052	1.36315	1.3661	1.35873	1.36463	1.36757	1.35579	1.36168	1.36315
	8.95e-07	1.32189	1.31453	1.32189	1.32337	1.32042	1.31895	1.31453	1.31747	1.316	1.316	1.31895	1.31747	1.31158	1.31305	1.32337	1.316	1.32337	1.31305	1.32631	1.31895	1.31747	1.316	1.31895	1.32631	1.32189	1.31453	1.32189	1.31453	1.31158	1.31747	1.32337	1.32189	1.32631	1.32631	1.32189	1.32337	1.31158	1.32189	1.31895	1.32042	1.31453	1.32042	1.32189	1.31747	1.316	1.32484	1.32337	1.32631
	9e-07	1.28063	1.28063	1.27621	1.28063	1.28063	1.27179	1.28063	1.27327	1.28358	1.27769	1.27474	1.288	1.27916	1.27621	1.28506	1.27769	1.27621	1.27769	1.27769	1.28211	1.27621	1.27769	1.28506	1.27621	1.27769	1.28506	1.27769	1.27327	1.27916	1.28211	1.27621	1.27621	1.27916	1.28211	1.27621	1.27916	1.28063	1.28506	1.27032	1.27032	1.27916	1.27474	1.28211	1.27032	1.27032	1.27621	1.28211	1.27474
	9.05e-07	1.2379	1.2379	1.23643	1.23053	1.23643	1.24232	1.23938	1.23938	1.23496	1.24232	1.23643	1.23201	1.23496	1.23938	1.23348	1.24085	1.24232	1.2379	1.23053	1.23496	1.23938	1.23643	1.23201	1.22317	1.2379	1.23348	1.23348	1.24232	1.24085	1.23643	1.24085	1.23348	1.23053	1.23496	1.23201	1.22759	1.24527	1.23348	1.23201	1.23201	1.24085	1.23643	1.23053	1.2379	1.23496	1.22611	1.22464	1.23938
	9.1e-07	1.18485	1.19812	1.19664	1.19075	1.19664	1.19075	1.18928	1.19075	1.19075	1.19222	1.19517	1.1878	1.19222	1.19812	1.19664	1.1937	1.1937	1.19517	1.20106	1.19517	1.1937	1.19664	1.18633	1.19812	1.1878	1.18928	1.18485	1.18928	1.19222	1.18633	1.19664	1.19222	1.19075	1.18928	1.1937	1.1937	1.18633	1.1878	1.19664	1.19812	1.19222	1.1937	1.18928	1.19664	1.20254	1.19075	1.19517	1.20696
	9.15e-07	1.14802	1.14802	1.14802	1.15538	1.14949	1.15244	1.14802	1.14949	1.15391	1.14949	1.14949	1.15391	1.15833	1.14802	1.15244	1.14949	1.15391	1.14654	1.15096	1.14507	1.14654	1.15096	1.14949	1.15391	1.15244	1.14507	1.15686	1.13475	1.14802	1.15096	1.14212	1.15391	1.15096	1.15391	1.15538	1.15833	1.14212	1.15833	1.14802	1.14802	1.1436	1.14802	1.15096	1.14507	1.14507	1.15391	1.15686	1.13918
	9.2e-07	1.1156	1.10086	1.11265	1.11118	1.11118	1.10381	1.10823	1.10086	1.11413	1.1097	1.10676	1.11118	1.10823	1.10676	1.1097	1.10676	1.11413	1.10381	1.10381	1.10676	1.11413	1.10528	1.11855	1.09939	1.11118	1.1097	1.11265	1.1156	1.10823	1.1097	1.10823	1.11265	1.10381	1.10676	1.10676	1.10086	1.12149	1.11265	1.10381	1.09939	1.1156	1.10676	1.11265	1.11118	1.1097	1.10823	1.10381	1.1097
	9.25e-07	1.06697	1.07434	1.06402	1.06992	1.07287	1.06108	1.0655	1.07139	1.0596	1.06697	1.06697	1.06402	1.04929	1.0655	1.06845	1.0655	1.0655	1.06697	1.0655	1.06697	1.06402	1.06108	1.05813	1.06108	1.05813	1.06402	1.04929	1.0655	1.06697	1.06697	1.0655	1.06255	1.06255	1.0655	1.06108	1.05813	1.06402	1.06255	1.06402	1.06697	1.06402	1.06697	1.0655	1.06402	1.0655	1.06108	1.0596	1.07434
	9.3e-07	1.0095	1.02129	1.01982	1.01245	1.02129	1.02571	1.01982	1.02571	1.02424	1.01982	1.02424	1.02424	1.02571	1.02277	1.0154	1.02129	1.02277	1.02277	1.02571	1.02424	1.02424	1.02424	1.0154	1.02424	1.02129	1.02277	1.02571	1.01687	1.02129	1.02129	1.01982	1.02277	1.01834	1.01982	1.01982	1.02866	1.01098	1.01834	1.02571	1.01834	1.0154	1.02424	1.01098	1.01982	1.02129	1.02719	1.02571	1.01687
	9.35e-07	0.97561	0.97119	0.98151	0.97856	0.97267	0.97561	0.96824	0.97414	0.98151	0.97267	0.97267	0.97267	0.98298	0.98445	0.98151	0.98003	0.98593	0.97709	0.97414	0.97267	0.97267	0.97856	0.97856	0.97856	0.98151	0.97561	0.97561	0.98151	0.98298	0.97561	0.98003	0.98593	0.97856	0.97414	0.98151	0.97709	0.97709	0.98445	0.97856	0.97119	0.98003	0.98003	0.97414	0.97119	0.98003	0.98298	0.98003	0.97856
	9.4e-07	0.94762	0.93583	0.93288	0.94614	0.94319	0.92993	0.93877	0.92846	0.93877	0.93288	0.92846	0.94319	0.92699	0.92551	0.9373	0.92993	0.94172	0.93583	0.9373	0.93583	0.9373	0.93288	0.94172	0.94172	0.94467	0.93435	0.92699	0.93141	0.93877	0.92993	0.93288	0.93435	0.9373	0.93877	0.94025	0.9373	0.93877	0.9373	0.93583	0.93141	0.93288	0.93288	0.95056	0.93583	0.93583	0.92993	0.93288	0.94172
	9.45e-07	0.89457	0.89309	0.89457	0.89899	0.89604	0.89604	0.90194	0.89604	0.8872	0.89604	0.90194	0.89309	0.89015	0.89604	0.88867	0.89604	0.88131	0.8872	0.88867	0.90046	0.90046	0.8872	0.89457	0.89751	0.89457	0.89604	0.89015	0.89457	0.88867	0.89899	0.89162	0.88867	0.88573	0.89604	0.88867	0.89751	0.89162	0.88425	0.88573	0.89015	0.89751	0.89015	0.88278	0.89309	0.89309	0.89751	0.89309	0.89162
	9.5e-07	0.84447	0.84594	0.85331	0.83857	0.84299	0.85183	0.85036	0.85626	0.84889	0.84299	0.85183	0.84447	0.85036	0.85331	0.84741	0.85478	0.85478	0.84741	0.84447	0.84741	0.84594	0.85626	0.84005	0.84447	0.84005	0.84741	0.85036	0.85036	0.85478	0.85331	0.85331	0.84889	0.84889	0.84005	0.84152	0.85036	0.85036	0.85036	0.85626	0.84889	0.85331	0.8592	0.84005	0.84889	0.84447	0.85183	0.84741	0.85478
	9.55e-07	0.80321	0.80321	0.80173	0.80321	0.80321	0.80173	0.80026	0.79731	0.81058	0.80026	0.79879	0.80173	0.81205	0.79879	0.81058	0.79879	0.815	0.81058	0.81352	0.79879	0.79584	0.8091	0.80763	0.81058	0.80763	0.80026	0.79879	0.80763	0.80321	0.80026	0.79731	0.81058	0.81647	0.79584	0.80763	0.8091	0.80763	0.8091	0.8091	0.80616	0.79879	0.80468	0.81205	0.79879	0.80468	0.80468	0.80763	0.80763
	9.6e-07	0.77226	0.7649	0.76195	0.77668	0.76932	0.75753	0.76932	0.76048	0.76342	0.76932	0.759	0.76784	0.75605	0.76048	0.76342	0.75753	0.759	0.759	0.76195	0.76048	0.76195	0.76048	0.77079	0.76342	0.76637	0.76784	0.76637	0.75605	0.75605	0.759	0.75311	0.76195	0.759	0.77079	0.77079	0.76048	0.759	0.76784	0.75458	0.76048	0.75753	0.759	0.76048	0.76048	0.76195	0.76342	0.77079	0.76048
	9.65e-07	0.71627	0.72216	0.72511	0.71922	0.72511	0.71922	0.72658	0.72953	0.71774	0.71774	0.72511	0.7148	0.7148	0.72806	0.71774	0.72364	0.71774	0.7148	0.71774	0.72364	0.72216	0.71627	0.71774	0.71185	0.71922	0.72364	0.7089	0.72511	0.72953	0.72806	0.72953	0.71774	0.71627	0.71627	0.71627	0.71185	0.72069	0.72216	0.7148	0.71332	0.73543	0.71922	0.7148	0.72364	0.71922	0.71774	0.7148	0.72806
	9.7e-07	0.67796	0.67796	0.67648	0.66912	0.67354	0.6809	0.67648	0.67354	0.67059	0.66912	0.68532	0.67501	0.68385	0.67501	0.66912	0.6809	0.67943	0.6868	0.68385	0.67943	0.67943	0.68238	0.66764	0.6809	0.67206	0.67059	0.67059	0.67796	0.68532	0.67206	0.67648	0.67648	0.6809	0.67206	0.66912	0.68238	0.6809	0.67354	0.68238	0.67796	0.6809	0.67943	0.67501	0.67796	0.68532	0.67354	0.68238	0.67796
	9.75e-07	0.63965	0.63817	0.6367	0.64407	0.63817	0.63228	0.63375	0.62638	0.63817	0.63375	0.63228	0.64259	0.63522	0.62786	0.63965	0.62638	0.64701	0.63817	0.64259	0.6308	0.62933	0.63375	0.63522	0.63965	0.64259	0.63375	0.64849	0.62049	0.62344	0.63375	0.62491	0.6367	0.6308	0.6308	0.64259	0.64407	0.63228	0.6367	0.63965	0.6367	0.63228	0.6308	0.64112	0.62786	0.63817	0.6367	0.64554	0.63375
	9.8e-07	0.59544	0.59249	0.58807	0.59839	0.59839	0.59249	0.59691	0.59397	0.60428	0.59544	0.58807	0.59544	0.59397	0.59691	0.59544	0.59544	0.59249	0.58512	0.58954	0.58512	0.59102	0.59397	0.59397	0.58365	0.59397	0.60133	0.58954	0.60575	0.58807	0.59986	0.58218	0.59839	0.59839	0.59102	0.59691	0.59249	0.59691	0.59691	0.58954	0.58512	0.59839	0.59691	0.58954	0.59102	0.59839	0.59986	0.59397	0.59544
	9.85e-07	0.54976	0.55418	0.55418	0.54681	0.55713	0.55565	0.55565	0.55418	0.54534	0.54239	0.54681	0.54829	0.54681	0.55713	0.54681	0.55123	0.54534	0.54829	0.5586	0.5586	0.55713	0.55123	0.55271	0.54681	0.55418	0.55123	0.53797	0.56007	0.56007	0.55271	0.56155	0.54387	0.54681	0.55271	0.54239	0.54829	0.55418	0.55123	0.55271	0.55418	0.55565	0.55271	0.54976	0.55418	0.54976	0.54534	0.54239	0.56007
	9.9e-07	0.50555	0.5085	0.51734	0.51292	0.50555	0.51145	0.51145	0.50703	0.49966	0.51292	0.51882	0.50703	0.51439	0.51439	0.50703	0.51439	0.51734	0.51292	0.50703	0.51292	0.5085	0.50703	0.50703	0.51145	0.50997	0.50113	0.5085	0.49966	0.51145	0.51292	0.50555	0.51145	0.49819	0.50408	0.50555	0.51439	0.50408	0.50113	0.5085	0.5085	0.5085	0.50703	0.50408	0.5085	0.51734	0.50997	0.51439	0.50703
	9.95e-07	0.47461	0.46577	0.46724	0.46871	0.47019	0.46724	0.46429	0.47166	0.4805	0.47019	0.47019	0.46577	0.47461	0.46429	0.46724	0.47314	0.47166	0.47314	0.46871	0.46429	0.46724	0.47166	0.46724	0.47314	0.47166	0.47903	0.48198	0.46577	0.47166	0.47314	0.46724	0.4805	0.48345	0.46577	0.48198	0.47166	0.47019	0.48198	0.46871	0.46724	0.46577	0.47314	0.46871	0.47019	0.47608	0.47756	0.47608	0.47314
	1e-06	0.4304	0.42451	0.41714	0.42893	0.42598	0.41714	0.42893	0.41714	0.42303	0.41714	0.41272	0.42598	0.42156	0.42009	0.42156	0.41714	0.42303	0.42303	0.42746	0.42598	0.42746	0.42009	0.42746	0.42451	0.42746	0.42451	0.41272	0.42893	0.42009	0.42303	0.42598	0.42451	0.42893	0.4304	0.41861	0.42451	0.4304	0.43482	0.42598	0.42303	0.42598	0.42156	0.43482	0.42156	0.42451	0.4304	0.41861	0.42009
	1.005e-06	0.3862	0.39356	0.39356	0.39356	0.38914	0.39209	0.39356	0.39356	0.38472	0.39062	0.39209	0.39356	0.3803	0.39062	0.38472	0.38914	0.38325	0.3862	0.38914	0.39209	0.38767	0.38472	0.38472	0.37883	0.39356	0.39062	0.38178	0.38914	0.38472	0.39504	0.39062	0.3862	0.37883	0.38767	0.38767	0.38472	0.38472	0.38325	0.3862	0.38914	0.38767	0.38472	0.3803	0.38767	0.38325	0.37883	0.38914	0.38767
	1.01e-06	0.34936	0.35378	0.35378	0.35231	0.35525	0.35673	0.35083	0.36262	0.35378	0.35673	0.35525	0.34494	0.3582	0.3582	0.35083	0.35967	0.35673	0.3582	0.35525	0.34641	0.3582	0.36115	0.35083	0.35083	0.34936	0.3582	0.35378	0.35378	0.36262	0.36115	0.35525	0.36115	0.35378	0.35525	0.35231	0.35231	0.34936	0.35231	0.35231	0.35231	0.35967	0.35673	0.34788	0.35083	0.35967	0.34788	0.35525	0.36704
	1.015e-06	0.30515	0.3022	0.30515	0.29778	0.29631	0.30368	0.29778	0.30073	0.30663	0.29631	0.3081	0.30073	0.30957	0.3022	0.30663	0.30515	0.3081	0.30957	0.30957	0.3081	0.30515	0.3081	0.31105	0.3081	0.30515	0.30368	0.30368	0.30663	0.30957	0.3081	0.30515	0.31105	0.3081	0.3022	0.30368	0.3081	0.3081	0.31399	0.30957	0.30368	0.30663	0.31105	0.3081	0.31105	0.31399	0.31547	0.31105	0.30368
	1.02e-06	0.28158	0.27126	0.26684	0.28158	0.27568	0.27126	0.27126	0.26537	0.26831	0.26979	0.27126	0.2801	0.26831	0.26831	0.26831	0.25652	0.26095	0.26389	0.27568	0.26979	0.26095	0.26242	0.26831	0.26831	0.27863	0.27421	0.26831	0.26537	0.26242	0.26242	0.26095	0.26684	0.26537	0.26831	0.2801	0.26537	0.26389	0.27568	0.26979	0.26979	0.26831	0.26389	0.26684	0.26537	0.26537	0.26537	0.27273	0.25947
	1.025e-06	0.23737	0.24621	0.23	0.2359	0.24621	0.23295	0.23884	0.24032	0.23442	0.24621	0.23442	0.23737	0.23147	0.24179	0.22853	0.23737	0.23147	0.23	0.22116	0.2359	0.24032	0.22853	0.23295	0.23	0.23147	0.23884	0.23295	0.23737	0.23737	0.24326	0.24032	0.24179	0.23	0.23295	0.22853	0.23147	0.23295	0.23442	0.22853	0.23	0.24179	0.23295	0.2359	0.22705	0.23147	0.22853	0.23442	0.23884
	1.03e-06	0.1858	0.19169	0.19758	0.18727	0.18874	0.19316	0.18727	0.19316	0.1858	0.18727	0.19464	0.1858	0.19464	0.19464	0.18727	0.20053	0.1858	0.19022	0.20053	0.19022	0.19758	0.19906	0.20053	0.18727	0.18285	0.18874	0.19022	0.19316	0.202	0.20053	0.19022	0.19022	0.19169	0.19169	0.1858	0.19758	0.19758	0.19022	0.19022	0.19758	0.19611	0.202	0.18727	0.20053	0.19464	0.19316	0.18874	0.19169
	1.035e-06	0.15485	0.14748	0.15338	0.1578	0.14454	0.1519	0.1519	0.15338	0.15338	0.14012	0.15485	0.14748	0.15485	0.15043	0.15485	0.13864	0.15338	0.15927	0.16074	0.15485	0.14896	0.15485	0.13864	0.15927	0.15485	0.14896	0.15338	0.1519	0.14601	0.14748	0.14748	0.1578	0.14748	0.14601	0.14896	0.15338	0.14748	0.14896	0.16074	0.15632	0.14454	0.1519	0.14896	0.14896	0.1519	0.15632	0.15338	0.14601
	1.04e-06	0.12243	0.11654	0.11064	0.11654	0.11949	0.11801	0.11801	0.12391	0.11949	0.11801	0.11064	0.11949	0.11507	0.10917	0.12096	0.11212	0.11359	0.11801	0.11359	0.1077	0.11212	0.11359	0.12243	0.11949	0.11654	0.12833	0.11801	0.11949	0.10917	0.11654	0.11654	0.12096	0.11359	0.11654	0.12096	0.10917	0.11654	0.12685	0.11064	0.10475	0.11654	0.11654	0.11949	0.1077	0.12096	0.11654	0.11949	0.10917
	1.045e-06	0.07823	0.08854	0.08117	0.07675	0.08117	0.07233	0.08117	0.07381	0.07528	0.08412	0.08265	0.07823	0.07381	0.08412	0.07381	0.07823	0.06939	0.06939	0.07086	0.08707	0.08559	0.07233	0.08854	0.07381	0.07233	0.07675	0.07675	0.07823	0.08265	0.08117	0.07675	0.07233	0.07233	0.07675	0.07528	0.07086	0.07823	0.07675	0.07086	0.07675	0.08265	0.07233	0.07381	0.0797	0.08117	0.07528	0.07233	0.08117
[truncated: 774 more columns]

## Sheet: 2f
Vg	2	1.78	1.71	1.61	1.53	1.43	1.33	1.21
TargetCond	0.00032	0.00028	0.00024	0.0002	0.00016	0.00012	8e-05	4e-05
ReadCond
Cycle 1	0.000321378	0.000283654	0.000242737	0.000207781	0.000161744	0.000124498	7.23104e-05	3.86604e-05
Cycle 2	0.000319685	0.000285168	0.000243444	0.000207534	0.000160045	0.000125986	8.46932e-05	4.82446e-05
Cycle 3	0.000327346	0.000278561	0.000241345	0.000204774	0.000160551	0.000116653	8.85755e-05	3.74701e-05
Cycle 4	0.000320607	0.00027614	0.00024574	0.000198867	0.000164325	0.000120826	7.68359e-05	4.29953e-05
Cycle 5	0.000326585	0.000279066	0.000247301	0.000195194	0.000158914	0.000135704	7.8293e-05	3.03898e-05
Cycle 6	0.000319909	0.0002748	0.000234443	0.00020272	0.000162975	0.000112059	7.29425e-05	4.97803e-05
Cycle 7	0.000328057	0.000273126	0.000244247	0.000196229	0.000151945	0.000114557	8.44118e-05	2.26858e-05
Cycle 8	0.00032554	0.000271367	0.000239348	0.000199526	0.000156173	0.00011232	6.80976e-05	5.83865e-05
Cycle 9	0.000322866	0.000277513	0.000242414	0.00020046	0.000155358	0.00012172	7.49662e-05	5.36456e-05
Cycle 10	0.000326406	0.000277763	0.000241923	0.000198321	0.000147674	0.000123708	7.7568e-05	5.48331e-05
Cycle 11	0.000327383	0.000278892	0.000246935	0.000202776	0.000162627	0.000111995	8.59818e-05	4.98838e-05
Cycle 12	0.000327038	0.000277266	0.000245342	0.000197353	0.000158441	0.000115677	8.35455e-05	3.96744e-05
Cycle 13	0.000326056	0.000280108	0.000237724	0.000198225	0.000158938	0.000133866	8.46521e-05	4.43588e-05
Cycle 14	0.000321332	0.000281828	0.000241313	0.000197381	0.000157312	0.000115844	8.54428e-05	4.84513e-05
Cycle 15	0.000330009	0.000280124	0.000240182	0.000197208	0.00015336	0.000119616	8.12055e-05	3.05856e-05
Cycle 16	0.000318471	0.000281179	0.000240361	0.000197116	0.000162389	0.000120002	7.9068e-05	4.89741e-05
Cycle 17	0.000324073	0.000280652	0.000245	0.000198656	0.000156041	0.000112333	8.67768e-05	1.21411e-05
Cycle 18	0.000319974	0.000285204	0.000235703	0.000195862	0.000153979	0.000115324	7.96866e-05	4.91852e-05
Cycle 19	0.00032435	0.000279947	0.000244228	0.000197465	0.000161036	0.00012342	8.38736e-05	4.64043e-05
Cycle 20	0.000317095	0.000285478	0.000247355	0.00019992	0.000153968	0.000122899	8.27082e-05	5.52428e-05
Cycle 21	0.000318342	0.000275135	0.000213098	0.000198398	0.000160116	0.000121866	8.93067e-05	3.3408e-05
Cycle 22	0.0003204	0.000278627	0.000243546	0.000196005	0.00015783	0.000118635	7.6974e-05	3.10127e-05
Cycle 23	0.000329463	0.000281862	0.000224957	0.000199827	0.000157785	0.000111936	8.29985e-05	4.71308e-05
Cycle 24	0.000317915	0.000271829	0.000235288	0.000205021	0.000164492	0.000121904	7.19726e-05	4.77532e-05
Cycle 25	0.000323386	0.000282031	0.000235817	0.000203907	0.000165181	0.00011766	8.79413e-05	3.81723e-05
Cycle 26	0.000324664	0.000278264	0.000236656	0.000203085	0.000154238	0.000110386	8.32832e-05	4.68209e-05
Cycle 27	0.000323235	0.00027146	0.000241727	0.000212253	0.000150471	0.000119722	7.90188e-05	3.11024e-05
Cycle 28	0.000326145	0.000276756	0.000237732	0.000199103	0.000161038	0.000118445	7.92934e-05	3.83122e-05
Cycle 29	0.000325555	0.00026973	0.000213245	0.000203552	0.000155446	0.000122974	7.22364e-05	4.31927e-05
Cycle 30	0.000320073	0.00027952	0.000233979	0.000209148	0.000162798	0.000118934	8.10862e-05	4.03022e-05
Cycle 31	0.000326428	0.000275053	0.000228585	0.000203904	0.000155137	0.000121269	7.52153e-05	4.48162e-05
Cycle 32	0.000326764	0.000279501	0.000237512	0.00020578	0.000149906	0.000108094	8.72565e-05	2.97831e-05
Cycle 33	0.000320328	0.000284807	0.00024554	0.000202671	0.000161998	0.00011694	6.96949e-05	2.83869e-05
Cycle 34	0.000333212	0.000274826	0.000236369	0.000204143	0.000154983	0.000123992	6.79936e-05	5.21807e-05
Cycle 35	0.000326702	0.000266695	0.000233909	0.000203401	0.00016025	0.000101513	7.86066e-05	3.64094e-05
Cycle 36	0.000321232	0.000285376	0.000236968	0.000200785	0.00015584	0.000113265	7.54285e-05	3.41248e-05
Cycle 37	0.000316871	0.000282404	0.000239526	0.000203864	0.000157219	0.000110612	7.95874e-05	4.62533e-05
Cycle 38	0.000327218	0.00027133	0.000243211	0.000196321	0.000155005	0.00012108	7.79792e-05	4.69014e-05
Cycle 39	0.000324382	0.000274868	0.000242156	0.00020025	0.000159282	0.000120095	7.20504e-05	3.76854e-05
Cycle 40	0.000320005	0.000280079	0.000238462	0.000195529	0.000158304	0.000120778	7.39713e-05	4.97524e-05
Cycle 41	0.000320014	0.000275738	0.000245033	0.000195596	0.000149616	0.000123845	7.40065e-05	4.06814e-05
Cycle 42	0.00031784	0.000277329	0.000237759	0.000202389	0.000161551	0.000118665	8.09209e-05	4.67167e-05
Cycle 43	0.000314544	0.000276772	0.000235479	0.000198359	0.000162201	0.000112038	8.21785e-05	3.63883e-05
Cycle 44	0.000318546	0.000277934	0.000236318	0.000201917	0.000155039	0.000126366	7.67622e-05	6.00739e-05
Cycle 45	0.000325065	0.000266836	0.000238997	0.00019751	0.000159752	0.000125178	8.06868e-05	4.25776e-05
Cycle 46	0.000322826	0.0002737	0.000241874	0.000194872	0.000161575	0.000122972	7.28193e-05	5.95028e-05
Cycle 47	0.000313838	0.000278599	0.000238646	0.000191488	0.000153672	0.000126091	7.39859e-05	5.1448e-05
Cycle 48	0.000325399	0.000266449	0.000244199	0.00019285	0.000158482	0.000115691	7.11573e-05	3.06643e-05
Cycle 49	0.00032366	0.000268418	0.000234894	0.000193753	0.00015802	0.000108959	7.63246e-05	2.55099e-05
Cycle 50	0.000321825	0.000265963	0.000240282	0.000188407	0.000163273	0.000102504	7.12804e-05	5.70501e-05

## Sheet: 2g
2 Seg Pulse	1 Seg Pulse
1.37777e-06	2.56487e-05
-3.15127e-07	-1.56121e-05
7.34649e-06	2.25286e-06
6.06555e-07	2.38955e-05
6.5847e-06	1.52711e-05
-9.0664e-08	-5.32335e-06
8.05695e-06	-1.52103e-05
5.54013e-06	2.76571e-06
2.86556e-06	1.56887e-05
6.40618e-06	-1.23078e-05
7.38345e-06	2.22494e-05
7.03836e-06	2.41065e-05
6.05632e-06	-1.76788e-05
1.33164e-06	8.27484e-06
1.00091e-05	-1.34538e-05
-1.52901e-06	1.36889e-05
4.07344e-06	1.44972e-05
-2.57625e-08	3.11146e-05
4.34974e-06	1.11494e-05
-2.90544e-06	-3.08075e-05
-1.65776e-06	-1.45847e-05
3.99663e-07	8.82415e-06
9.46321e-06	-3.46441e-05
-2.08522e-06	-1.37177e-05
3.3863e-06	-2.59067e-05
4.66396e-06	-2.48284e-07
3.23463e-06	-9.12382e-06
6.1449e-06	5.78389e-06
5.55522e-06	-1.93486e-06
7.2754e-08	6.85199e-06
6.42768e-06	1.3814e-05
6.76369e-06	-3.79599e-05
3.28431e-07	8.42321e-06
1.32123e-05	-1.31115e-05
6.7025e-06	-1.32802e-05
1.2317e-06	-1.80901e-05
-3.12932e-06	-4.16794e-06
7.21818e-06	1.10414e-05
4.38249e-06	1.21662e-05
5.37863e-09	-2.06656e-06
1.38915e-08	-2.14773e-05
-2.15987e-06	-9.49252e-06
-5.45563e-06	-3.25364e-05
-1.45389e-06	7.85245e-06
5.0653e-06	-1.59348e-05
2.82619e-06	2.98337e-06
-6.16165e-06	-1.58559e-05
5.39854e-06	2.59226e-06
3.65976e-06	-1.69903e-05
1.82451e-06	-1.06527e-05
3.65364e-06	4.25332e-06
5.16815e-06	-1.25009e-06
-1.43946e-06	-2.00639e-05
-3.8597e-06	-3.73513e-07
-9.33597e-07	-1.48468e-05
-5.19955e-06	-1.60564e-05
-6.87387e-06	-3.42759e-05
-8.63345e-06	1.03742e-05
-2.48716e-06	-2.53499e-05
-2.23668e-06	1.33859e-05
-1.10827e-06	2.01897e-05
-2.73441e-06	-3.01943e-05
1.08084e-07	-1.06568e-05
1.82794e-06	2.62274e-06
1.24473e-07	8.83466e-06
1.17898e-06	-1.72755e-05
6.51907e-07	-1.11411e-05
5.20442e-06	-3.00228e-05
-5.26055e-08	1.06528e-05
5.4779e-06	-2.22153e-05
-4.86483e-06	-2.808e-05
-1.37288e-06	-7.26949e-06
1.86204e-06	-5.22729e-06
-8.17139e-06	-3.30885e-06
2.0311e-06	1.47567e-05
-1.73613e-06	-2.16313e-05
-8.53957e-06	-1.65511e-05
-3.24422e-06	4.85577e-06
-1.02703e-05	-5.72454e-06
-4.80341e-07	-1.15217e-05
-4.94729e-06	-1.02455e-05
-4.99058e-07	-5.3352e-06
4.80661e-06	-3.83353e-07
-5.1739e-06	1.9404e-06
-1.33048e-05	-4.50621e-06
5.3763e-06	1.94273e-05
2.40396e-06	-2.88525e-05
-8.67014e-06	-4.88483e-06
-5.13166e-06	2.72572e-06
7.88892e-08	2.17602e-05
-4.26162e-06	-1.80746e-05
-2.6706e-06	1.02182e-05
-3.2284e-06	-1.58757e-05
-2.06614e-06	2.21885e-06
-1.31638e-05	-1.89103e-05
-6.30047e-06	3.11393e-06
-1.40128e-06	-8.86636e-06
-1.35514e-05	8.66638e-07
-1.15815e-05	2.32749e-05
-1.40372e-05	1.04206e-05
2.73657e-06	-3.36668e-05
3.44366e-06	-1.97104e-05
1.34495e-06	-1.04678e-05
5.73966e-06	1.1029e-05
7.30125e-06	-7.61415e-06
-5.55679e-06	4.02756e-06
4.24736e-06	-1.04746e-05
-6.51593e-07	2.38745e-05
2.41364e-06	1.38685e-05
1.92259e-06	8.44463e-06
6.93488e-06	-1.3335e-05
5.34239e-06	3.03701e-06
-2.27593e-06	-1.53276e-05
1.31339e-06	4.71339e-06
1.81777e-07	-1.14835e-06
3.61129e-07	4.17923e-06
5.00012e-06	-1.36237e-05
-4.29663e-06	1.16811e-05
4.22765e-06	-1.69656e-05
7.35472e-06	-2.29866e-05
-2.69017e-05	-1.55231e-05
3.54607e-06	-1.60126e-05
-1.50432e-05	-8.7129e-06
-4.71178e-06	-2.49957e-06
-4.18254e-06	-8.81334e-07
-3.34437e-06	-7.26987e-06
1.72726e-06	3.28784e-06
-2.26811e-06	1.5348e-06
-2.6755e-05	-5.20213e-06
-6.02096e-06	-3.03388e-05
-1.14145e-05	-7.44824e-06
-2.48797e-06	-3.19498e-06
5.54001e-06	-1.88009e-05
-3.63101e-06	-6.59262e-06
-6.09103e-06	-6.30459e-06
-3.03172e-06	2.25117e-05
-4.73769e-07	1.10465e-05
3.21105e-06	6.11905e-06
2.15598e-06	8.15231e-06
-1.53759e-06	9.36376e-06
5.03302e-06	5.05169e-06
-2.24077e-06	2.66878e-06
-4.52118e-06	6.50032e-06
-3.68198e-06	1.62369e-05
-1.00297e-06	1.96828e-05
1.87367e-06	1.45219e-05
-1.35412e-06	-2.923e-06
4.1988e-06	2.43408e-05
-5.10572e-06	8.86315e-06
2.81712e-07	4.60124e-06
7.78056e-06	-1.98492e-06
7.53352e-06	-2.4529e-06
4.77435e-06	1.80918e-05
-1.13317e-06	-6.6183e-06
-4.80563e-06	1.50573e-05
2.72002e-06	1.53218e-05
-3.77146e-06	1.23457e-05
-4.73546e-07	1.38328e-05
4.59923e-07	1.53123e-05
-1.67935e-06	1.48898e-06
2.77562e-06	1.5587e-05
-2.64742e-06	8.09189e-06
-1.77549e-06	4.281e-06
-2.61937e-06	-1.80531e-05
-2.79177e-06	1.19249e-05
-2.88414e-06	1.6495e-05
-1.34377e-06	1.81615e-05
-4.13846e-06	4.99868e-06
-2.53506e-06	6.45735e-07
-7.97343e-08	2.91895e-05
-1.60168e-06	1.86617e-05
-3.99538e-06	4.08643e-06
-1.72557e-07	6.75202e-06
5.02089e-06	5.97455e-06
3.90716e-06	-4.90978e-06
3.08502e-06	7.78646e-06
1.22526e-05	5.88477e-06
-8.96897e-07	-1.85828e-05
3.55235e-06	1.84743e-05
9.148e-06	8.77394e-06
3.90393e-06	4.04843e-06
5.78043e-06	-7.61e-06
2.67076e-06	7.7316e-06
4.14265e-06	5.92869e-06
3.40074e-06	-2.54762e-06
7.84558e-07	1.63641e-05
3.86387e-06	3.61684e-06
-3.67928e-06	-1.69575e-05
2.49976e-07	5.74877e-06
-4.47148e-06	1.00275e-05
-4.40395e-06	1.85127e-05
2.38938e-06	3.23692e-05
-1.64097e-06	1.4377e-05
1.91672e-06	5.84996e-06
-2.48953e-06	1.97023e-05
-5.12765e-06	-2.49744e-05
-8.51233e-06	4.97169e-06
-7.15018e-06	2.64992e-06
-6.24682e-06	-7.40529e-06
-1.15931e-05	-4.50498e-07
1.74395e-06
4.509e-08
5.50551e-07
4.32492e-06
-1.08621e-06
2.97539e-06
-8.05457e-06
-3.8267e-06
-4.64185e-06
-1.23255e-05
2.62722e-06
-1.5594e-06
-1.0616e-06
-2.68803e-06
-6.64037e-06
2.38924e-06
-3.95856e-06
-6.02089e-06
1.03586e-06
-6.03166e-06
1.15958e-07
-2.16991e-06
-2.21515e-06
4.49188e-06
5.1815e-06
-5.76234e-06
-9.52918e-06
1.03844e-06
-4.55361e-06
2.79751e-06
-4.86269e-06
-1.00938e-05
1.99814e-06
-5.0167e-06
2.50017e-07
-4.1598e-06
-2.78076e-06
-4.99477e-06
-7.1774e-07
-1.69577e-06
-1.03844e-05
1.55085e-06
2.20067e-06
-4.9611e-06
-2.48222e-07
1.57531e-06
-6.32849e-06
-1.5183e-06
-1.97955e-06
3.27285e-06
4.49791e-06
5.9857e-06
-3.34657e-06
8.26033e-07
1.57035e-05
-7.94061e-06
-5.44349e-06
-7.68043e-06
1.71965e-06
3.70761e-06
-8.00532e-06
-4.32346e-06
1.38662e-05
-4.156e-06
-3.83904e-07
1.60317e-09
-7.66694e-06
-4.67631e-06
3.41963e-06
2.89886e-06
1.86576e-06
-1.36491e-06
-8.06399e-06
1.90373e-06
-2.34013e-06
-9.6137e-06
-2.77976e-07
-1.55471e-06
2.97435e-06
-1.06575e-06
1.26938e-06
-1.19056e-05
-3.05998e-06
3.99224e-06
-1.84875e-05
-6.73485e-06
-9.38784e-06
1.08042e-06
9.52538e-08
7.77857e-07
3.84516e-06
-1.33499e-06
-7.9621e-06
6.36566e-06
5.17837e-06
2.97196e-06
6.091e-06
-4.3085e-06
-1.10411e-05
-1.74959e-05
-7.68962e-06
4.69318e-06
8.57546e-06
-3.16413e-06
-1.707e-06
-7.0575e-06
4.41181e-06
-1.19024e-05
-5.03377e-06
-2.43201e-06
5.98182e-06
3.54555e-06
4.65212e-06
5.4428e-06
1.20549e-06
-9.32024e-07
6.77679e-06
-3.13441e-07
3.87358e-06
2.7082e-06
9.30667e-06
-3.02604e-06
2.9985e-06
-8.02738e-06
7.94132e-06
3.28321e-06
-9.8121e-07
-7.06597e-07
-7.76365e-06
1.08616e-06
-4.78471e-06
7.25653e-06
-1.03051e-05
-1.20064e-05
-1.39336e-06
-4.5715e-06
-4.12557e-07
-2.02083e-06
-7.94961e-06
-6.02873e-06
-5.99351e-06
9.2088e-07
2.17852e-06
-3.23778e-06
6.86822e-07
-7.18071e-06
-6.01415e-06
-8.84273e-06
-3.67536e-06
-8.71961e-06
-1.33958e-06
8.24458e-06
-2.52994e-06
2.99525e-06
-9.61022e-06
9.78033e-06
-1.73142e-05
1.83865e-05
1.36456e-05
1.48331e-05
9.88381e-06
-3.25568e-07
4.35883e-06
8.45135e-06
-9.41442e-06
8.97407e-06
-2.78589e-05
9.18518e-06
6.40435e-06
1.52428e-05
-6.59198e-06
-8.98731e-06
7.13085e-06
7.75316e-06
-1.82768e-06
6.82093e-06
-8.89761e-06
-1.68785e-06
3.19274e-06
3.0217e-07
4.81619e-06
-1.02169e-05
-1.16131e-05
1.21807e-05
-3.59058e-06
-5.8752e-06
6.25333e-06
6.90143e-06
-2.31463e-06
9.75237e-06
6.81356e-07
6.71667e-06
-3.61173e-06
2.00739e-05
2.57756e-06
1.95028e-05
1.1448e-05
-9.3357e-06
-1.44901e-05
1.70501e-05

## Sheet: 3c
TargetCond	0.00032	0.00032	0.00032	0.00032	0.00032	0.00028	0.00028	0.00028	0.00028	0.00028	0.00024	0.00024	0.00024	0.00024	0.00024	0.0002	0.0002	0.0002	0.0002	0.0002	0.00016	0.00016	0.00016	0.00016	0.00016	0.00012	0.00012	0.00012	0.00012	0.00012	8e-05	8e-05	8e-05	8e-05	8e-05	4e-05	4e-05	4e-05	4e-05	4e-05
Channel	1	2	3	4	5	1	2	3	4	5	1	2	3	4	5	1	2	3	4	5	1	2	3	4	5	1	2	3	4	5	1	2	3	4	5	1	2	3	4	5
ReadCond
Cycle 1	0.000317015	0.000330195	0.000323842	0.000307688	0.000329718	0.000286119	0.00026309	0.00028934	0.000294754	0.000271793	0.000225936	0.000246546	0.00024516	0.000238153	0.000233382	0.000193989	0.000193873	0.000203169	0.000205629	0.000199625	0.000171859	0.000160633	0.000162529	0.00015148	0.000156139	0.000131768	0.00011146	0.000106905	0.000116556	0.000134318	7.23052e-05	9.35806e-05	8.46207e-05	7.96884e-05	8.54065e-05	3.70036e-05	3.76325e-05	3.47749e-05	4.92272e-05	4.7949e-05
Cycle 2	0.000320373	0.000328982	0.000307329	0.000313422	0.000339265	0.000283186	0.000283171	0.000276914	0.000293527	0.000265519	0.00023057	0.000244634	0.000240467	0.00025274	0.000250689	0.000189269	0.000193375	0.000204	0.000205237	0.000196936	0.000168961	0.000140578	0.000164988	0.000150268	0.000164461	0.000134285	0.000106087	0.000114187	0.000115591	0.000127942	8.34318e-05	9.44135e-05	7.63101e-05	8.53729e-05	7.65216e-05	3.52208e-05	4.71631e-05	4.74745e-05	4.86215e-05	4.54556e-05
Cycle 3	0.000315195	0.000306918	0.000329805	0.000328619	0.000323896	0.000282027	0.000287307	0.000275472	0.000285947	0.00026666	0.000226766	0.000251939	0.0002389	0.000252712	0.000245675	0.000186484	0.000194871	0.000210219	0.000201295	0.000191559	0.000162171	0.000142789	0.000177876	0.000166143	0.000161331	0.000127325	0.000102102	0.000106649	0.000107018	0.000130007	8.3334e-05	9.15905e-05	8.37619e-05	8.61651e-05	8.68831e-05	4.06565e-05	4.66783e-05	4.46748e-05	5.27373e-05	4.38653e-05
Cycle 4	0.000316528	0.000321928	0.000309897	0.000314063	0.00030906	0.000269181	0.000288872	0.000279119	0.000273116	0.000284575	0.000235801	0.000243909	0.00025214	0.000232636	0.000237045	0.000212708	0.000195106	0.000206135	0.000214049	0.000193675	0.000160899	0.000164991	0.000170998	0.000166851	0.000156377	0.000134154	0.000121338	0.000116699	0.000123536	0.000126212	8.32643e-05	8.37109e-05	8.33972e-05	7.46633e-05	7.73977e-05	2.3172e-05	4.90261e-05	3.93605e-05	5.37998e-05	4.43695e-05
Cycle 5	0.000317636	0.000316918	0.000320612	0.000334285	0.000315126	0.000274842	0.000281026	0.000276918	0.000292248	0.0002873	0.000226856	0.000246597	0.000239183	0.000251697	0.000251082	0.000199673	0.000211319	0.00020255	0.000205699	0.000200278	0.000167634	0.000166551	0.000153862	0.000162092	0.000151537	0.000115167	0.000111263	0.000112485	0.000120432	0.000125949	8.33908e-05	9.2985e-05	9.7694e-05	8.95925e-05	7.59607e-05	2.88629e-05	5.49665e-05	3.35449e-05	4.902e-05	4.5368e-05
Cycle 6	0.000324828	0.000333592	0.000324441	0.000328307	0.000330453	0.000287408	0.000269109	0.000284588	0.000289891	0.000283522	0.000228565	0.000247895	0.000235496	0.000231766	0.000243281	0.000201936	0.000213819	0.000202581	0.000210171	0.00020845	0.000163703	0.000173681	0.000151005	0.000162828	0.000152526	0.000121634	0.000117534	0.000111691	0.00011699	0.000116653	8.61794e-05	9.02447e-05	7.75726e-05	8.93965e-05	7.53532e-05	3.67116e-05	5.16457e-05	3.72359e-05	5.16077e-05	3.59222e-05
Cycle 7	0.000313169	0.000311046	0.00030883	0.000309568	0.000314616	0.000284471	0.000280816	0.000288158	0.000293404	0.000287098	0.000234482	0.000241906	0.000236295	0.000226088	0.000247276	0.000205133	0.000205909	0.0002012	0.000200831	0.00020151	0.000164343	0.000174038	0.000146158	0.000159902	0.000146413	0.000127623	0.000113125	0.000111367	0.00012239	0.000117309	8.86813e-05	8.79456e-05	8.06476e-05	8.62189e-05	7.77265e-05	4.42456e-05	5.24035e-05	3.68238e-05	5.14932e-05	3.85565e-05
Cycle 8	0.000326467	0.000313794	0.000312077	0.000305957	0.000316173	0.000269959	0.000271772	0.000280403	0.000263769	0.000290945	0.00022975	0.000222997	0.000242717	0.000248639	0.000247418	0.000206874	0.000204346	0.000204463	0.00020726	0.000198097	0.000145866	0.000165641	0.00015353	0.000146932	0.000151202	0.000124616	0.000113756	0.000107912	0.000122642	0.000111725	8.78572e-05	9.08504e-05	9.20062e-05	7.79723e-05	8.37845e-05	2.18508e-05	4.7239e-05	3.19982e-05	4.80098e-05	3.62853e-05
Cycle 9	0.000310771	0.00033036	0.000323883	0.000326028	0.000330176	0.000269224	0.000262118	0.000277317	0.000290062	0.000285775	0.000228272	0.000244042	0.000230976	0.000250242	0.000247749	0.00019595	0.000205721	0.00019918	0.000207527	0.000204447	0.000161284	0.000162441	0.000153898	0.000157393	0.000160069	0.000125306	0.000110446	0.000108356	0.000116641	0.000111533	8.15695e-05	8.97946e-05	8.38165e-05	8.40416e-05	8.38971e-05	3.83008e-05	5.35611e-05	3.19305e-05	5.43754e-05	2.72268e-05
Cycle 10	0.00032755	0.000313915	0.000313361	0.000305924	0.000309605	0.000284661	0.000283132	0.000266478	0.000284719	0.000283181	0.000234165	0.000234125	0.000243725	0.00025266	0.000233645	0.000197255	0.000181461	0.000200578	0.000209932	0.000209697	0.00015134	0.000169757	0.000166582	0.000159668	0.000156176	0.000119887	0.000117309	0.000108558	0.00012181	0.000117764	8.91887e-05	8.94489e-05	8.5933e-05	7.72912e-05	7.7327e-05	3.71418e-05	5.5629e-05	4.09862e-05	4.61389e-05	3.65944e-05
Cycle 11	0.000328789	0.000315065	0.000316344	0.000314017	0.000310799	0.000287574	0.000270492	0.000272819	0.000291059	0.000274136	0.000254783	0.000251382	0.000244728	0.00024735	0.000248113	0.000188319	0.000203333	0.000205551	0.000205065	0.000201129	0.000160855	0.000168417	0.000165085	0.000154368	0.000150747	0.000120508	0.000122829	0.000116147	0.000118757	0.000119815	8.87423e-05	9.11091e-05	8.91579e-05	9.02493e-05	7.99755e-05	3.9224e-05	4.98478e-05	3.11525e-05	4.83228e-05	5.09095e-05
Cycle 12	0.000343663	0.000311244	0.000327213	0.00032244	0.000325769	0.000258295	0.000280756	0.000274142	0.000290036	0.00028051	0.000246429	0.000236249	0.00023526	0.000254374	0.000235766	0.000200603	0.000207067	0.000202626	0.000208307	0.000205653	0.000172006	0.000169031	0.000156565	0.000168852	0.000163651	0.000119296	0.000107074	0.000112917	0.000127582	0.000125391	9.21002e-05	8.95613e-05	8.09091e-05	8.34174e-05	7.71696e-05	4.00118e-05	4.87286e-05	2.85037e-05	5.05126e-05	4.63794e-05
Cycle 13	0.000312798	0.000329879	0.000305037	0.00031941	0.00031194	0.00028258	0.000267654	0.000278597	0.000292647	0.000286177	0.000252757	0.000242923	0.000231257	0.000254768	0.000249312	0.000194834	0.000204265	0.0001783	0.000204625	0.000198816	0.000160934	0.000168395	0.000158763	0.000166943	0.000149715	0.000121096	0.000123793	0.000106492	0.000116798	0.000116124	8.65052e-05	9.0906e-05	8.25407e-05	8.99906e-05	8.22745e-05	4.51588e-05	4.20877e-05	3.32582e-05	5.3435e-05	4.43478e-05
Cycle 14	0.000331082	0.000317399	0.000334729	0.000306838	0.000325851	0.000274372	0.000280832	0.000270694	0.000288171	0.000274959	0.000246814	0.000238576	0.000250711	0.000229306	0.000244157	0.000204235	0.000183179	0.000201914	0.000202975	0.000197761	0.000145698	0.000161269	0.000155299	0.000155968	0.000157638	0.000113619	0.00014959	0.000113053	0.000106539	0.000125042	8.87129e-05	9.46153e-05	7.93702e-05	8.79114e-05	7.44072e-05	4.02002e-05	4.98512e-05	3.60133e-05	4.78567e-05	4.83762e-05
Cycle 15	0.000321583	0.000326656	0.000322875	0.00031223	0.000315374	0.000278865	0.000283945	0.000269542	0.00028598	0.000287618	0.0002344	0.000246929	0.00024002	0.000236061	0.000240657	0.000199965	0.000203557	0.00020708	0.000213084	0.000202907	0.000158102	0.000154136	0.000150518	0.000160411	0.000158714	0.000116451	0.000111049	0.000106257	0.000126954	0.00012466	8.46773e-05	9.01425e-05	8.17793e-05	9.03623e-05	7.01499e-05	4.28059e-05	4.97713e-05	3.21013e-05	5.30149e-05	4.57004e-05
Cycle 16	0.00031242	0.000326924	0.000305764	0.000309359	0.000323404	0.000293046	0.000287571	0.000288875	0.000269855	0.000280341	0.000252611	0.000246585	0.00024009	0.000232459	0.000235906	0.00020403	0.000203209	0.000198761	0.000206181	0.000196423	0.000169866	0.00016046	0.000159902	0.000138201	0.000150548	0.0001235	0.000107958	0.00012075	0.000108945	0.000117129	8.84073e-05	8.71423e-05	8.077e-05	8.95976e-05	7.73356e-05	3.0168e-05	4.51249e-05	3.80706e-05	5.48447e-05	4.37659e-05
Cycle 17	0.000321598	0.000306414	0.000323281	0.00031319	0.000312938	0.000267357	0.000270365	0.000274397	0.000285834	0.000289921	0.000238597	0.000246588	0.00023866	0.000240158	0.000238707	0.000201512	0.00020442	0.000203091	0.000214496	0.000197289	0.000162807	0.000169455	0.000160864	0.000158458	0.000149608	0.000111563	0.000111216	0.000114398	0.000119555	0.000126345	8.05124e-05	8.70954e-05	8.43822e-05	8.38827e-05	9.61944e-05	2.73456e-05	4.1263e-05	2.5355e-05	5.47902e-05	4.5637e-05
Cycle 18	0.000312209	0.00032344	0.000315392	0.000306806	0.000323576	0.000296914	0.000274475	0.000286567	0.000294183	0.00027194	0.000240058	0.000238585	0.000234453	0.000227621	0.000246216	0.000212105	0.000202744	0.000202757	0.000207135	0.000199689	0.000183218	0.000160995	0.000163945	0.000146049	0.000149971	0.000109085	0.000119167	0.000113608	0.000123052	0.000125257	8e-05	9.44484e-05	8.44918e-05	8.30041e-05	7.36568e-05	3.3448e-05	3.88497e-05	3.06424e-05	4.28023e-05	4.40269e-05
Cycle 19	0.000324222	0.000324211	0.000321966	0.00030821	0.000315404	0.000280471	0.000281401	0.000292598	0.000271164	0.000268971	0.000251048	0.000229727	0.000249653	0.000230704	0.000239823	0.000210231	0.000197304	0.000195128	0.0002078	0.000195929	0.000162195	0.000154458	0.000177976	0.000166118	0.000154111	0.00010998	0.000115219	0.000117542	0.000110225	0.000122419	8.51107e-05	9.09656e-05	8.84571e-05	8.6573e-05	7.26013e-05	2.69171e-05	4.24957e-05	2.76907e-05	4.41783e-05	4.04099e-05
Cycle 20	0.000307842	0.000318447	0.000307521	0.000309967	0.000327736	0.000279127	0.00027135	0.000298387	0.000279005	0.000276295	0.000239309	0.000244481	0.000246109	0.000237188	0.000246786	0.000200743	0.00020788	0.000198873	0.000213969	0.000204697	0.000162291	0.000152597	0.000154368	0.00016462	0.000154554	0.000109578	0.000109257	0.000116123	0.000104448	0.00011113	9.21882e-05	9.19915e-05	8.47171e-05	7.79912e-05	8.31636e-05	3.06276e-05	3.6069e-05	3.733e-05	3.73266e-05	3.62009e-05
Cycle 21	0.000308844	0.000306665	0.000329876	0.000338178	0.000323859	0.000270624	0.000291242	0.000289791	0.000271684	0.000267502	0.000232395	0.000237561	0.000241828	0.000238354	0.000245777	0.00019873	0.000203578	0.000200037	0.00019899	0.0002018	0.000164541	0.000151733	0.000153945	0.000157561	0.000164466	0.000108521	0.000109838	0.000109583	0.00012083	0.000123706	9.30068e-05	9.35009e-05	8.92547e-05	8.64484e-05	7.64918e-05	2.87954e-05	4.87965e-05	4.01666e-05	3.45284e-05	3.12561e-05
Cycle 22	0.000317514	0.000323629	0.000306227	0.000310775	0.000321223	0.000289216	0.00026637	0.000289264	0.000258551	0.000272895	0.000238798	0.000240501	0.000221456	0.000241774	0.000231524	0.000197834	0.000207344	0.000205311	0.00021072	0.000204156	0.000158625	0.000158657	0.000165247	0.000160201	0.000162296	0.00010779	0.000115663	0.000118514	0.000114323	0.000120562	9.08711e-05	9.03991e-05	8.31575e-05	8.40164e-05	7.3521e-05	2.917e-05	4.91222e-05	3.63147e-05	5.36125e-05	3.14114e-05
Cycle 23	0.000305261	0.000311187	0.000307293	0.000323048	0.000334981	0.000270008	0.000289546	0.000282247	0.000272343	0.000271471	0.000240557	0.000239573	0.000237131	0.000236163	0.000252839	0.00020106	0.000199048	0.00020278	0.000209334	0.000197566	0.000169207	0.000152906	0.000159107	0.000164776	0.000148478	0.000111732	0.000112359	0.000109074	0.000111285	0.000116527	9.08171e-05	9.72038e-05	8.7179e-05	8.63068e-05	8.42972e-05	2.62804e-05	5.18003e-05	3.73241e-05	4.13082e-05	5.66456e-05
Cycle 24	0.000330781	0.000321958	0.000321377	0.000309816	0.000306886	0.000270471	0.000265988	0.000287022	0.000276757	0.000268325	0.000243113	0.000240908	0.00024314	0.000227679	0.000250551	0.000199586	0.000203136	0.000199708	0.000213549	0.000200755	0.000157052	0.000159504	0.000159673	0.000134902	0.000178603	0.000117969	0.000117638	0.000113291	0.00011329	0.000119701	9.27344e-05	9.3441e-05	8.53703e-05	9.48713e-05	7.39163e-05	2.64594e-05	4.45442e-05	4.55004e-05	5.12873e-05	3.39731e-05
Cycle 25	0.000321033	0.000335364	0.000309667	0.000311095	0.000332391	0.000276	0.000278287	0.000280356	0.000265495	0.000293363	0.000231406	0.000246822	0.000246697	0.000238614	0.000239549	0.000194206	0.000205092	0.000200687	0.000208705	0.000201232	0.000146392	0.000153218	0.000161139	0.000158278	0.00016657	0.0001104	0.000124044	0.000118622	0.000124207	0.000115038	8.81324e-05	9.44975e-05	8.6512e-05	8.64649e-05	7.16136e-05	2.64089e-05	4.4335e-05	5.79897e-05	2.94524e-05	2.86689e-05
Cycle 26	0.000311082	0.000334204	0.000311542	0.000325342	0.000315219	0.000265843	0.000279007	0.000290097	0.000283215	0.00028614	0.000230453	0.000232595	0.000228474	0.000242186	0.000230854	0.000197772	0.000197644	0.00019156	0.000211526	0.000198755	0.000151558	0.000149284	0.000154504	0.000163581	0.000161847	0.000106898	0.000119177	0.00011121	0.0001129	0.000119315	8.68412e-05	9.00083e-05	8.6811e-05	9.13015e-05	7.42765e-05	2.55236e-05	4.96919e-05	4.97946e-05	3.00035e-05	2.94673e-05
Cycle 27	0.000327805	0.000313753	0.000309227	0.00030568	0.00032029	0.000272087	0.000269291	0.000297311	0.000277208	0.000283909	0.000246508	0.000246359	0.000242813	0.000241533	0.000239706	0.00018667	0.000194888	0.000198426	0.000208323	0.000208152	0.000165479	0.000151846	0.00016349	0.0001593	0.000162083	0.000119526	0.000103011	0.000118967	0.000111548	0.00012035	9.36742e-05	9.13313e-05	8.53676e-05	8.29673e-05	8.26662e-05	2.92812e-05	3.54369e-05	5.19095e-05	5.68989e-05	2.96887e-05
Cycle 28	0.000316588	0.000321267	0.000321827	0.000316753	0.000322826	0.00028715	0.000274908	0.000285248	0.000274543	0.000284726	0.000232496	0.00024571	0.000234071	0.000225274	0.000231848	0.000200239	0.000204436	0.000201376	0.000203438	0.000209112	0.000166466	0.000165779	0.00016419	0.000164576	0.000157033	0.000106331	0.000100837	0.000112687	0.000108001	0.00012657	9.37775e-05	8.87799e-05	7.99152e-05	8.56859e-05	8.0525e-05	2.91842e-05	3.86412e-05	3.36441e-05	3.21657e-05	2.73564e-05
Cycle 29	0.000312531	0.000316257	0.000318578	0.000330938	0.000335717	0.000273819	0.000289202	0.000288281	0.000271462	0.000269791	0.000247379	0.000241764	0.00024461	0.000254476	0.000249108	0.000196984	0.000196551	0.000201562	0.000202683	0.000205228	0.000161733	0.000158934	0.000148907	0.0001567	0.000161347	0.000112326	0.00010799	0.000106648	0.000119352	0.000113739	9.41054e-05	9.29386e-05	8.40181e-05	8.41547e-05	7.91008e-05	3.12379e-05	4.24642e-05	5.19694e-05	3.67666e-05	3.15447e-05
Cycle 30	0.00031161	0.00031909	0.000325028	0.000332013	0.000325519	0.000282616	0.000267223	0.000291546	0.00028128	0.000282055	0.000232641	0.000254738	0.000245863	0.000234184	0.000242515	0.000195604	0.000198675	0.000196054	0.00019788	0.000201413	0.000160291	0.000157292	0.000170279	0.000154156	0.000164658	0.000112621	0.000122335	0.000107479	0.000111057	0.000112227	8.88994e-05	8.86746e-05	7.57949e-05	8.23012e-05	7.09233e-05	3.65567e-05	3.79028e-05	4.36881e-05	3.54788e-05	2.86319e-05
Cycle 31	0.000309223	0.000321997	0.000312492	0.00032036	0.000315812	0.000275638	0.000269566	0.000286384	0.000278345	0.000289184	0.000232223	0.000247017	0.000229352	0.000238328	0.000252207	0.000185771	0.000197529	0.000201767	0.000202933	0.000202485	0.000169087	0.000148665	0.00017609	0.000159023	0.000157229	0.000108073	0.00011842	0.000105427	0.000107038	0.000108623	8.83823e-05	9.08456e-05	8.21852e-05	7.0378e-05	7.35669e-05	3.29255e-05	3.981e-05	4.74063e-05	3.03069e-05	2.76885e-05
Cycle 32	0.0003133	0.000311275	0.000329426	0.000317182	0.000316181	0.000276447	0.000267715	0.000291363	0.000263112	0.000285194	0.000233185	0.000247384	0.000254068	0.000230993	0.000233051	0.000193861	0.000203798	0.000198503	0.000207569	0.000205792	0.000156607	0.000155	0.000169729	0.000155829	0.000151476	0.0001104	0.000125608	0.000107048	0.000115911	0.00012471	9.03159e-05	9.20512e-05	8.44344e-05	7.98356e-05	8.18811e-05	4.02166e-05	4.41022e-05	5.48965e-05	2.84702e-05	3.57985e-05
Cycle 33	0.000318978	0.000316693	0.00032335	0.000324378	0.000315155	0.000281336	0.000280915	0.000292647	0.000285936	0.000284814	0.000231068	0.000241775	0.000252965	0.000230968	0.000249263	0.00019449	0.000200207	0.000200377	0.000201742	0.000204586	0.000168374	0.000172773	0.000161885	0.000162233	0.000160367	0.000111659	0.000112849	0.000115531	0.000111401	0.000121228	9.29923e-05	9.30554e-05	8.12045e-05	8.26095e-05	8.57892e-05	2.43614e-05	4.31267e-05	5.26084e-05	2.54078e-05	3.21377e-05
Cycle 34	0.000325283	0.000326488	0.000334785	0.000333605	0.000307556	0.000280541	0.000277747	0.000294202	0.000285	0.000270671	0.000228243	0.000221719	0.000246908	0.000229017	0.000252221	0.000200312	0.000204077	0.000198932	0.0001982	0.000205453	0.000166301	0.000155235	0.000155958	0.000158678	0.000157887	0.000123659	0.000114022	0.00012419	0.000116955	0.00012483	8.7392e-05	9.45099e-05	7.90899e-05	8.04532e-05	8.08838e-05	3.61185e-05	4.39256e-05	4.53789e-05	3.63475e-05	3.14844e-05
Cycle 35	0.000313399	0.00031376	0.000328322	0.000314429	0.000326247	0.000285255	0.000276435	0.000279802	0.000289205	0.000288021	0.000235037	0.000246766	0.000234556	0.000242383	0.000246662	0.000207323	0.000198945	0.000201803	0.000200147	0.000212858	0.000170798	0.000153955	0.000165407	0.000159745	0.000151192	0.000112393	0.000107237	0.000109588	0.000117665	0.000115099	8.79665e-05	9.35405e-05	8.55103e-05	7.43044e-05	7.34604e-05	3.89313e-05	3.87922e-05	3.85058e-05	4.75064e-05	3.46437e-05
Cycle 36	0.000322215	0.000329633	0.000312059	0.000306473	0.000315135	0.000273938	0.000266764	0.000264042	0.000280392	0.000276288	0.000253953	0.000241839	0.000236164	0.000238323	0.000252966	0.000189379	0.000199052	0.000207255	0.000197621	0.000209709	0.000160487	0.00015642	0.000153357	0.000157829	0.000163189	0.000135367	0.000142291	0.000125007	0.000120002	0.000126339	8.87234e-05	8.72686e-05	9.53883e-05	6.54677e-05	8.04424e-05	4.23429e-05	3.98703e-05	5.995e-05	4.56331e-05	4.33335e-05
Cycle 37	0.000308983	0.000305529	0.00032223	0.000306106	0.00031507	0.000291806	0.000270065	0.000281405	0.000275742	0.000291741	0.000249715	0.000237785	0.000247482	0.000231276	0.000231375	0.000172582	0.000199611	0.000202948	0.000200403	0.000206869	0.000167932	0.000159166	0.000156952	0.00016122	0.000161194	0.000106589	0.000124128	0.000113046	0.000114449	0.000126727	8.56657e-05	8.70806e-05	7.59288e-05	7.84359e-05	7.11014e-05	4.52832e-05	3.81253e-05	4.6962e-05	3.0792e-05	4.21564e-05
Cycle 38	0.000330516	0.000305597	0.000306869	0.000322569	0.000322151	0.000282726	0.000273336	0.000286654	0.000293004	0.000286527	0.000243222	0.000239623	0.000253665	0.00024131	0.00025432	0.000198697	0.00020139	0.000204085	0.000177388	0.000210429	0.000159866	0.000172905	0.000159738	0.000158555	0.000157695	0.000115126	0.000119523	0.000108942	0.000114709	0.000127203	8.80545e-05	9.26464e-05	7.72413e-05	8.63371e-05	7.63762e-05	3.68943e-05	4.34845e-05	4.99485e-05	4.81673e-05	4.69241e-05
Cycle 39	0.000317598	0.000313876	0.00031212	0.000338096	0.000328816	0.000275417	0.000284591	0.000289688	0.000279751	0.000286405	0.000250739	0.000242851	0.00023832	0.000241553	0.000251605	0.000192135	0.00019854	0.00020784	0.000207365	0.000206447	0.000147148	0.000171915	0.000152791	0.000148402	0.000163469	0.000109581	0.000105636	0.000107213	0.000121814	0.000125999	9.19054e-05	8.84192e-05	8.13057e-05	7.76033e-05	8.04344e-05	3.61228e-05	4.3923e-05	4.74341e-05	5.01263e-05	4.54065e-05
Cycle 40	0.000331582	0.000318406	0.00031168	0.000317791	0.000311377	0.000262828	0.000278397	0.000277841	0.000286883	0.000266704	0.000251931	0.000241162	0.00023924	0.000234664	0.000226975	0.000188324	0.000205821	0.000204658	0.000203481	0.000196755	0.000162583	0.000157727	0.000163451	0.000154102	0.000158957	0.000114556	0.000123128	0.000105553	0.000117728	0.000101584	9.15917e-05	9.18857e-05	8.10766e-05	8.79515e-05	7.35363e-05	3.23185e-05	4.78056e-05	4.08705e-05	4.05327e-05	3.788e-05
Cycle 41	0.000323962	0.000320226	0.000328742	0.000318069	0.000331107	0.000290668	0.00026606	0.000288019	0.000290315	0.000272214	0.000248222	0.000237138	0.000239436	0.000249358	0.000243947	0.000188814	0.000201664	0.000198557	0.000206748	0.000201199	0.000168989	0.000180613	0.000158957	0.000152991	0.000154792	0.000104211	0.000107437	0.00011609	0.000117778	0.000121919	8.82242e-05	8.71183e-05	8.36966e-05	8.31942e-05	8.25041e-05	3.84548e-05	5.16021e-05	4.79556e-05	3.89575e-05	3.91852e-05
Cycle 42	0.000320397	0.00030855	0.000316562	0.00032995	0.00031404	0.000272179	0.000272423	0.000292568	0.000279512	0.000273897	0.000242662	0.000231568	0.000248574	0.000232691	0.000246943	0.000197744	0.000198828	0.000204575	0.000211726	0.000201251	0.000162298	0.000161082	0.000166378	0.000158195	0.000155823	0.000112865	0.000113985	0.000111895	0.000109953	0.000126654	8.86752e-05	8.48214e-05	8.48595e-05	8.38535e-05	8.19096e-05	4.84417e-05	5.00155e-05	5.4597e-05	4.41118e-05	4.47311e-05
Cycle 43	0.000313376	0.000331783	0.000338822	0.000312896	0.000327454	0.000266754	0.000274102	0.000293843	0.000269475	0.000287357	0.000250026	0.000231044	0.000252711	0.000238304	0.000249363	0.000199177	0.000202394	0.000203452	0.000209252	0.000203965	0.000166883	0.000146218	0.000167278	0.000160532	0.000155059	0.000108754	0.000113385	0.000114777	0.000115994	0.000133622	8.90003e-05	9.02147e-05	8.30824e-05	8.0062e-05	8.26665e-05	4.00816e-05	4.85159e-05	5.12334e-05	4.87986e-05	4.93125e-05
Cycle 44	0.000309406	0.000305414	0.000318126	0.000315765	0.000323121	0.0002823	0.000277811	0.000293439	0.000273708	0.000269764	0.000238873	0.000237403	0.000251667	0.000233488	0.000237316	0.00019745	0.000198624	0.000203577	0.00020737	0.000198513	0.000161942	0.000166305	0.000157546	0.000135995	0.00014253	0.000122209	0.00011178	0.000107615	0.000114879	0.000127584	9.07786e-05	7.86746e-05	8.03402e-05	8.13161e-05	8.66392e-05	4.31054e-05	5.04873e-05	5.20775e-05	4.97051e-05	5.03941e-05
Cycle 45	0.00033623	0.00032324	0.000304404	0.000326404	0.000328103	0.000276061	0.000280576	0.00029259	0.000273974	0.000275726	0.000245041	0.000242624	0.000244701	0.000241861	0.000244613	0.000198238	0.000203981	0.000210081	0.00021293	0.000199019	0.000167409	0.000149739	0.000157774	0.000157065	0.000156596	0.00010692	0.000109515	0.000109274	0.00011172	0.000125384	9.40487e-05	8.47622e-05	8.58503e-05	7.59927e-05	8.25119e-05	5.1191e-05	4.09767e-05	5.01878e-05	5.23235e-05	4.48818e-05
Cycle 46	0.000313404	0.000307507	0.000311649	0.000319665	0.000331192	0.000268026	0.000274852	0.000289904	0.000280942	0.000293229	0.000244201	0.000245289	0.000231477	0.000232286	0.000244867	0.00019243	0.000200271	0.000202712	0.000213968	0.000196735	0.00016262	0.000153986	0.000158538	0.000151058	0.000157897	0.000110749	0.000105331	0.00011994	0.000115672	0.000126429	9.43497e-05	8.88469e-05	8.13071e-05	7.25868e-05	7.91008e-05	5.47759e-05	4.49473e-05	5.47909e-05	2.55153e-05	4.12138e-05
Cycle 47	0.000307802	0.000314019	0.000327225	0.000311182	0.000317857	0.000282926	0.000274022	0.000280299	0.000271418	0.000281135	0.000246566	0.000245778	0.000234368	0.000234959	0.000253981	0.000190461	0.000206144	0.000202514	0.000214447	0.000194581	0.000160904	0.000152095	0.000158774	0.00015481	0.000164531	0.000113417	0.000140399	0.000120285	0.00012002	0.000121779	9.70379e-05	8.76986e-05	8.22992e-05	8.10559e-05	8.00262e-05	3.7614e-05	4.40639e-05	5.42107e-05	3.45115e-05	4.16016e-05
Cycle 48	0.000329922	0.000311086	0.000306322	0.000330551	0.00032407	0.000280113	0.000283198	0.000294085	0.000284657	0.000281773	0.000252717	0.000253415	0.000243278	0.000254916	0.000240625	0.00018676	0.000183933	0.000206095	0.000213322	0.000193265	0.000168168	0.000153849	0.000174195	0.000161003	0.000149901	0.000106149	0.000109528	0.000108406	0.000127331	0.000124707	9.49259e-05	7.82584e-05	8.45217e-05	8.31511e-05	7.98732e-05	4.40493e-05	4.24454e-05	4.90283e-05	4.90745e-05	4.52221e-05
Cycle 49	0.000327743	0.000307081	0.000318127	0.000320408	0.000319784	0.00027873	0.000292109	0.000282838	0.000270462	0.000273591	0.000245934	0.000247356	0.000225078	0.000247078	0.000234385	0.000173637	0.000200341	0.00021292	0.000200294	0.000201364	0.000168824	0.000171912	0.000161204	0.000149668	0.000155277	0.000117831	0.000116534	0.000121684	0.000116352	0.000126684	8.77059e-05	8.50006e-05	8.1524e-05	7.64134e-05	7.90284e-05	4.68858e-05	4.64176e-05	3.54264e-05	5.04932e-05	4.60712e-05
Cycle 50	0.000307439	0.000323446	0.000313791	0.000326099	0.000311773	0.000279183	0.000276358	0.000290307	0.000294959	0.000285151	0.000248071	0.000232981	0.000250809	0.000236885	0.000248973	0.000188835	0.000208856	0.000211773	0.000200546	0.000200252	0.000159582	0.000162828	0.000164071	0.000156969	0.000156533	0.000116633	0.000109837	0.000120389	0.000119536	0.000123346	9.28918e-05	8.53719e-05	8.51335e-05	7.00253e-05	8.40215e-05	5.68591e-05	3.9428e-05	5.07598e-05	5.07302e-05	4.6862e-05

## Sheet: 3e
Sample 1	Target Data	255	255	255	255	255	255	255	255	255	255	255	255	255	255	255	255	255	255	255	255	255	255	255	255	255	0	0	0	255	255	255	255	255	255	255	0	0	0	255	255
		255	255	255	255	255	255	0	0	0	255	255	255	255	255	255	255	0	0	0	255	255	255	255	255	255	0	0	0	255	255	255	255	255	255	255	0	0	0	255	255
		255	255	255	255	255	255	0	0	0	255	255	255	255	255	255	255	0	0	0	255	255	255	255	255	255	0	0	0	255	255	255	255	255	255	255	0	0	0	255	255
		255	255	255	255	255	255	0	0	0	255	255	255	255	255	255	255	0	0	0	255	255	255	255	255	0	0	0	0	255	255	255	255	255	255	0	0	0	0	255	255
		255	255	255	255	255	255	0	0	0	255	255	255	255	255	255	0	0	0	255	255	255	255	255	0	0	0	0	0	255	255	255	255	255	0	0	0	0	0	255	255
		255	255	255	255	255	0	0	0	0	255	255	255	255	255	0	0	0	0	255	255	255	255	0	0	0	0	0	0	0	255	255	255	255	0	0	0	0	0	255	255
		255	255	255	255	255	0	0	0	0	255	255	255	255	0	0	0	0	0	255	255	255	255	0	0	0	0	0	0	0	0	255	255	0	0	0	0	0	0	0	255
		255	255	255	255	0	0	0	0	0	255	255	255	255	0	0	0	0	0	0	255	255	255	0	0	0	0	0	0	0	255	255	255	0	0	0	0	0	0	0	0
		255	255	255	255	0	0	0	0	0	255	255	255	255	0	0	0	0	0	0	0	255	255	255	0	0	0	0	0	255	255	255	255	0	0	0	0	0	0	255	255
		255	255	255	255	0	0	0	0	255	255	255	255	255	0	0	0	0	0	0	0	255	255	255	0	0	0	0	0	255	255	255	255	255	0	0	0	0	255	255	255
		255	255	255	255	0	0	0	0	0	255	255	255	255	255	0	0	0	0	0	255	255	255	255	0	0	0	0	0	255	255	255	255	255	0	0	0	0	0	255	255
		255	255	255	255	0	0	0	0	0	255	255	255	255	255	0	0	0	0	255	255	255	255	255	255	0	0	0	0	255	255	255	255	255	255	0	0	0	255	255	255
		255	255	255	255	0	0	0	0	0	255	255	255	255	255	0	0	0	0	255	255	255	255	255	0	0	0	0	0	255	255	255	255	255	255	0	0	0	255	255	255
		255	255	255	255	0	0	0	0	0	255	255	255	255	255	0	0	0	0	255	255	255	255	255	0	0	0	0	0	0	255	255	255	255	0	0	0	0	0	255	255
		255	255	255	255	0	0	0	0	0	255	255	255	255	255	0	0	0	0	0	255	255	255	255	0	0	0	0	0	0	255	255	255	255	0	0	0	0	0	255	255
		255	255	255	255	255	0	0	0	0	255	255	255	255	255	0	0	0	0	0	255	255	255	0	0	0	0	0	0	0	255	255	255	0	0	0	0	0	0	255	255
		255	255	0	0	0	0	0	0	0	255	255	255	255	255	0	0	0	0	0	255	255	255	0	0	255	255	0	0	0	255	255	0	0	0	0	0	0	0	255	255
		255	0	0	0	0	0	0	0	0	255	255	255	255	255	0	0	0	0	255	255	255	0	0	0	255	0	0	0	255	255	0	0	0	0	255	255	0	0	0	255
		0	0	0	0	0	0	0	0	0	255	255	255	0	0	0	0	0	255	255	255	255	0	0	255	255	0	0	0	255	255	0	0	0	255	255	255	0	0	0	255
		0	0	255	255	255	0	0	0	0	255	255	255	0	0	0	0	0	255	255	255	255	0	0	255	255	0	0	0	255	255	0	255	255	255	255	255	0	0	0	255
		0	255	255	255	255	255	0	0	0	255	255	255	0	0	0	0	255	255	255	255	0	0	255	255	255	0	0	255	255	255	0	255	255	255	255	255	0	0	0	255
		255	255	255	255	255	0	0	0	0	255	255	255	255	0	0	0	255	255	255	255	0	0	255	255	255	0	0	255	255	255	255	255	255	255	255	255	0	0	0	255
		255	255	255	255	255	0	0	0	0	255	255	255	0	0	0	255	255	255	255	255	0	0	255	255	255	255	255	255	255	255	255	255	255	255	255	255	0	0	0	255
		255	255	255	255	255	0	0	0	255	255	255	255	0	0	0	255	255	255	255	255	255	0	255	255	255	255	255	255	255	255	255	255	255	255	255	255	0	0	0	255
	Restored Data	244.282	231.405	230.547	236.265	234.05	231.937	238.457	229.394	228.448	237.251	237.93	230.537	236.915	242.707	241.243	239.706	232.616	223.295	243.539	242.929	234.137	243.319	232.931	226.668	230.866	21.4757	23.9679	27.8801	233.925	234.887	235.264	229.596	227.071	241.607	239.264	20.4382	26.0317	20.973	233.253	230.384
		239.064	230.877	231.684	232.431	235.891	240.078	15.6929	18.3776	15.1668	228.963	233.39	230.16	234.615	236.57	240.722	238.979	15.1666	10.4816	20.6664	225.637	237.533	243.158	225.375	235.991	244.708	25.7606	34.523	20.0769	243.179	235.035	238.545	247.218	245.398	229.34	232.504	37.0945	26.5347	25.9517	239.998	223.628
		251.331	242.698	224.915	241.267	235.192	238.992	14.8076	19.7667	30.0444	239.728	240.404	229.788	232.639	233.648	239.901	236.721	27.6364	14.4633	18.5023	230.968	238.254	234.846	239.129	237.027	240.473	21.0024	16.6797	26.0494	230.416	233.318	231.595	233.188	243.192	235.858	240.766	12.8547	10.3881	15.1854	241.599	236.457
		246.174	235.449	230.784	239.199	229.897	233.173	13.8525	27.8559	18.3429	227.538	230.338	233.937	231.054	241.358	243.523	236.883	27.8687	19.1061	28.0983	230.586	230.862	233.118	233.503	232.649	18.7787	18.6471	9.11245	17.8407	236.495	241.039	245.785	246.881	228.741	235.104	15.6192	12.8949	22.3832	24.4575	247.709	227.065
		238.865	240.073	234.137	235.967	236.766	228.461	21.0322	29.2675	19.315	226.714	231.003	219.21	245.609	228.806	229.072	20.5855	18.7324	11.9291	225.628	242.637	234.21	231.938	233.825	11.8468	20.3361	26.3534	25.9	22.2208	239.26	228.844	228.588	234.866	234.858	34.1701	5.18996	22.8442	19.3065	20.7892	239.275	229.364
		234.737	238.422	240.828	231.982	225.38	11.8212	19.8346	14.886	18.042	251.749	234.591	238.754	229.294	236.474	18.5264	22.8273	18.6291	20.9134	237.45	231.697	233.821	238.214	19.8557	20.7967	10.1535	24.5775	19.9954	14.3515	16.6321	233.912	227.011	245.266	241.929	17.3401	29.143	25.5795	12.4462	15.7232	245.696	237.866
		235.115	233.344	242.093	231.811	238.626	17.6691	16.7819	16.4974	20.8833	227.189	237.191	232.841	237.879	24.3434	11.4514	21.9038	22.802	15.2117	235.688	228.839	224.731	232.669	14.389	19.0474	23.2513	19.1018	25.2298	24.6288	27.9174	15.2464	231.58	240.324	34.6191	16.0379	20.3558	23.579	12.9395	10.9037	22.4191	227.67
		241.017	243.279	237.588	243.414	18.0075	21.1957	20.1756	24.1978	14.2018	222.301	233.307	227.317	232.247	24.5831	14.7572	23.527	28.5279	23.7108	13.748	240.444	228.093	244.391	8.85174	27.6585	21.8816	21.3235	27.7141	7.0543	12.4729	233.479	229.428	226.939	17.161	26.404	25.8549	19.2004	12.0442	15.3123	15.1912	29.3916
		234.942	240.546	231.007	234.007	12.4358	26.8037	8.72764	25.1937	18.0657	230.403	244.938	239.095	244.047	23.1966	18.1396	12.3426	22.2869	23.9907	12.5274	24.1358	228.115	237.693	238.235	15.6636	30.5381	20.0682	25.9587	11.6341	233.434	233.732	235.904	241.251	20.7485	21.467	18.5232	27.7951	26.7769	17.1114	224.87	233.411
		235.109	234.93	234.226	222.818	19.6111	23.1228	26.7154	16.9469	236.185	249.379	234.794	238.519	239.992	13.0805	20.3627	18.4328	23.3743	17.4831	15.783	20.3021	229.134	246.125	235.901	12.3375	21.0503	11.1468	24.9944	18.9258	233.945	236.072	223.545	232.848	247.255	17.6368	21.6581	15.573	22.6723	240.448	230.058	227.524
		235.235	232.306	243.655	235.909	24.5144	17.8254	24.0195	19.8066	23.4093	228.806	231.351	238.396	230.213	239.562	17.1048	20.2136	16.8697	24.7655	25.5033	234.424	231.277	229.39	232.672	17.9627	25.9792	21.2875	21.037	18.8265	222.828	226.134	233.324	235.97	230.156	25.6328	10.689	13.1205	18.1822	20.955	238.634	244.254
		241.776	234.29	246.023	232.872	19.9717	19.6417	9.08754	23.0434	20.0874	240.758	236.669	231.141	251.382	239.738	17.194	24.6243	9.82643	20.4282	235.475	242.263	235.021	223.724	229.395	228.4	18.9617	22.984	13.2491	13.9396	235.704	242.149	223.736	239.442	236.314	238.541	17.9393	20.3298	35.2004	237.828	235.066	234.861
		238.621	240.924	230.623	242.418	11.6566	19.5838	23.8742	29.3472	15.6339	239.365	236.128	228.346	245.525	232.176	25.8844	24.403	26.9186	12.868	235.123	243.315	231.759	234.22	225.037	20.2573	16.6122	24.5805	13.0207	20.5935	234.783	236.613	231.654	227.662	234.317	236.151	24.9635	16.8508	20.5257	238.516	240.025	228.219
		222.036	228.083	234.108	230.262	9.61502	15.2036	13.8812	13.831	14.5215	237.086	237.09	226.353	227.895	246.73	17.0533	25.8657	20.8398	19.9739	233.313	227.935	241.549	245.777	234.986	21.6887	24.3025	21.1172	24.1458	32.7653	28.4244	231.328	221.463	225.814	241.281	17.7455	12.649	20.788	19.5739	25.249	223.255	232.21
		236.03	235.033	241.499	233.427	26.4018	19.7168	16.767	19.9296	19.8372	242.62	239.602	225.95	234.36	238.852	22.3779	25.7968	16.805	15.4026	30.1664	232.884	235.414	232.889	232.844	20.7082	10.996	15.7008	11.1922	22.3243	27.0728	233.144	224.845	216.637	229.248	29.8109	20.6966	21.0669	24.3819	18.2755	228.612	230.623
		236.517	227.391	233.336	245.711	251.442	23.7068	20.4074	16.0599	24.7392	225.411	230.885	237.793	242.384	234.265	31.0289	28.0705	28.9881	27.0954	9.29359	239.625	240.683	226.596	28.404	20.2129	24.435	17.8371	14.0461	20.8837	20.4839	238.939	237.937	240.901	20.1159	20.9936	20.687	28.046	23.1596	18.8524	235.686	238.865
		230.303	238.474	19.6288	21.7607	13.9145	34.9873	23.787	37.5364	10.6102	229.009	229.053	232.888	234.196	230.424	20.5975	22.1547	17.6282	18.4695	13.1844	231.368	246.567	242.563	25.6956	18.5103	233.424	238.855	16.5513	24.4809	22.1294	229.854	228.805	24.0984	21.9251	24.111	18.3906	21.7326	13.8584	22.0639	231.892	233.896
		234.978	16.2545	17.4881	21.2611	24.7264	16.7743	21.7983	32.9949	14.4595	232.741	232.376	221.519	234.053	242.615	27.3568	32.6585	24.7238	23.9161	229.94	247.172	235.081	18.155	22.2232	5.76395	236.364	11.7531	10.8897	17.3526	240.306	224.715	10.8985	15.8247	30.1113	11.4654	227.442	241.842	15.0381	27.5468	19.857	230.458
		18.7214	17.2045	16.9488	10.7316	19.2378	14.9708	25.7483	17.7683	15.3812	234.403	237.323	230.549	19.0978	16.7259	10.6771	22.0156	15.9269	226.116	228.953	234.557	230.46	18.715	21.0035	231.738	228.921	26.5373	7.18054	10.7758	241.588	220.356	2.6439	18.6549	24.1009	241.866	230.849	234.036	23.0642	15.8074	8.9669	236.073
		22.355	21.9076	228.486	234.787	240.625	12.2665	24.6135	21.0086	14.2659	230.096	229.903	223.852	27.6183	29.7272	20.3602	12.9603	20.6291	238.137	228.833	243.65	227.352	20.7428	14.2864	231.66	232.092	15.568	24.1643	14.1037	235.503	243.014	20.8094	226.179	239.011	229.089	238.87	231.87	20.544	28.8682	16.4329	239.499
		18.7357	238.054	233.691	240.183	233.138	227.723	18.2614	16.0423	9.79163	244.14	230.718	240.636	5.68465	11.6741	10.4396	12.554	236.974	232.94	240.168	230.497	24.6283	14.2345	231.462	249.751	234.375	18.4306	6.37111	249.073	231.022	248.174	19.7191	239.582	243.046	225.098	246.932	228.472	29.4983	12.8922	23.1482	228.803
		239.699	240.328	228.646	232.967	237.609	34.7955	2.83107e-14	25.0238	22.3053	229.571	234.181	234.445	233.029	16.8323	2.3583	22.8127	231.02	242.026	237.808	228.806	14.8523	19.8933	235.261	223.804	226.481	10.473	25.28	229.699	242.644	227.334	219.403	226.974	243.173	227.745	239.947	221.866	21.2089	19.8138	19.6666	243.816
		233.409	233.963	231.082	240.279	235.463	13.6847	14.8544	26.429	27.6768	238.207	237.307	235.414	15.672	15.4108	14.8644	235.188	236.704	233.018	237.851	233.303	10.8507	28.6204	233.801	242.217	221.55	238.698	233.651	226.104	239.72	240.56	235.129	234.46	221.195	238.677	242.705	230.13	16.4153	12.5633	18.9473	246.169
		229.283	238.9	240.633	235.512	236.773	14.7865	22.6603	15.2754	230.626	235.725	240.414	245.099	12.8165	17.2045	20.088	225.928	229.956	233.257	233.254	237.074	236.314	14.7936	235.087	248.895	229.782	241.224	235.259	251.448	249.382	233.448	236.082	246.621	234.99	231.695	235.045	251.248	32.5233	16.1047	19.5104	235.367
Sample 2	Target Data	255	255	255	255	255	255	255	255	255	255	255	255	255	255	255	255	255	255	255	255	255	255	255	255	0	0	0	255	255	255	255	255	255	255	255	0	0	0	255	255
		255	255	255	255	255	255	255	255	255	255	255	255	255	255	255	255	0	255	255	255	255	255	255	255	0	0	0	255	255	255	255	255	255	255	255	0	0	255	255	255
		255	255	255	255	255	255	255	255	255	255	255	255	255	255	255	0	0	0	255	255	255	255	255	255	0	0	0	255	255	255	255	255	255	255	255	0	0	255	255	255
		255	255	255	255	255	255	0	0	255	255	255	255	255	255	255	0	0	0	255	255	255	255	255	255	0	0	255	255	255	255	255	255	255	255	0	0	0	255	255	255
		255	255	255	255	255	0	0	0	255	255	255	255	255	255	255	0	0	0	255	255	255	255	255	0	0	0	0	255	255	255	255	255	255	255	0	0	0	255	255	255
		255	255	255	255	255	255	0	0	255	255	255	255	255	255	255	0	0	0	255	255	255	255	255	0	0	0	0	255	255	255	255	255	255	255	0	0	0	0	255	255
		255	255	255	255	255	0	0	0	255	255	255	255	255	255	0	0	0	255	255	255	255	255	255	0	0	0	0	255	255	255	255	255	255	255	0	0	0	0	255	255
		255	255	255	255	0	0	0	0	255	255	255	255	255	255	0	0	0	0	255	255	255	255	255	0	0	0	0	0	255	255	255	255	255	255	0	0	0	0	255	255
		255	255	255	255	0	0	0	0	255	255	255	255	255	255	0	0	0	0	255	255	255	255	255	0	0	0	0	0	255	255	255	255	255	255	0	0	0	0	255	255
		255	255	255	255	0	0	0	0	255	255	255	255	255	255	0	0	0	0	255	255	255	255	255	0	0	0	0	0	255	255	255	255	255	255	0	0	0	0	255	255
		255	255	255	0	0	0	0	0	255	255	255	255	255	255	0	0	0	0	255	255	255	255	255	255	0	0	0	0	255	255	255	255	255	255	0	0	0	0	255	255
		255	255	255	0	0	0	0	0	255	255	255	255	255	0	0	0	0	0	255	255	255	255	255	255	0	0	0	0	255	255	255	255	255	255	0	0	0	0	255	255
		255	255	0	0	0	0	0	0	255	255	255	255	255	0	0	0	0	0	255	255	255	255	255	255	0	0	0	0	255	255	255	255	255	255	255	0	0	0	255	255
		255	255	0	0	0	0	0	255	255	255	255	255	255	0	0	0	0	0	255	255	255	255	255	255	255	0	0	255	255	255	255	255	255	255	255	0	0	0	255	255
		255	255	0	0	0	0	0	255	255	255	255	255	255	0	0	0	0	0	255	255	255	255	255	255	255	0	0	255	255	255	255	255	255	255	255	0	0	0	255	255
		255	255	255	0	0	0	0	255	255	255	255	255	255	255	0	0	0	255	255	255	255	255	255	255	0	0	0	255	255	255	255	255	255	255	255	0	0	0	255	255
		255	255	255	255	0	0	0	255	255	255	255	255	255	255	0	0	0	255	255	255	255	255	255	255	0	0	0	255	255	255	255	255	255	255	0	0	0	0	255	255
		255	255	255	255	0	0	0	0	255	255	255	255	255	255	0	0	0	255	255	255	255	255	255	0	0	0	255	255	255	255	255	255	255	255	0	0	0	255	255	255
		255	255	255	255	0	0	0	0	255	255	255	255	255	255	255	0	0	255	255	255	255	255	255	0	0	0	255	255	255	255	255	255	255	0	0	0	255	255	255	255
		255	255	255	255	255	0	0	0	255	255	255	255	255	255	255	0	0	255	255	255	255	255	0	0	0	255	255	255	255	255	255	255	0	0	0	0	255	255	255	255
		255	255	255	255	255	0	0	0	255	255	255	255	255	255	0	0	0	255	255	255	255	255	0	0	0	255	255	255	255	255	255	255	0	0	0	255	255	255	255	255
		255	255	255	255	255	0	0	0	255	255	255	255	255	255	0	0	0	255	255	255	255	0	0	0	255	255	255	255	255	255	255	255	255	0	0	255	255	255	255	255
		255	255	255	255	255	0	0	0	255	255	255	255	255	0	0	0	255	255	255	255	255	0	0	255	255	255	255	255	255	255	255	255	255	0	0	0	255	255	255	255
		255	255	255	255	255	0	0	0	255	255	255	255	255	0	0	0	255	255	255	255	255	255	0	255	255	255	255	255	255	255	255	255	255	255	255	255	255	255	255	255
	Restored Data	233.901	221.736	232.599	245.176	233.354	238.686	234.208	235.124	230.422	233.481	227.567	231.403	226.206	243.611	234.017	238.36	233.464	227.885	236.303	241.116	220.499	235.372	228.957	228.47	19.3785	14.8283	25.4097	225.485	240.857	236.661	236.787	224.996	237.458	222.49	245.754	17.3702	22.6962	30.6123	243.551	241.143
		245.79	236.291	238.998	235.826	233.235	231.247	231.208	234.079	236.829	233.947	242.661	236.038	253.206	241.384	242.644	232.76	29.0284	246.703	241.223	226.653	232.543	230.232	234.636	232.637	18.5411	15.7621	15.4702	231.499	237.672	242.12	227.172	239.375	230.045	231.548	222.481	19.095	23.8094	240.363	236.576	226.242
		225.176	231.696	233.498	230.826	248.624	237.699	241.893	228.118	242.152	235.826	231.34	237.803	234.16	234.651	234.736	12.5144	31.3144	20.4727	239.512	239.782	233.828	230.96	240.134	235.292	8.85875	16.6764	26.571	226.929	242.542	227.304	231.257	231.948	226.668	242.481	234.112	21.5062	21.186	236.462	237.215	234.776
		230.079	236.614	238.436	241.384	226.679	232.681	15.9131	17.5648	232.544	234.048	231.373	228.936	230.205	227.047	231.991	13.6468	12.5829	26.5107	234.093	237.789	231.58	231.318	241.384	230.336	26.9677	15.1936	213.321	244.083	244.166	235.042	254.457	233.46	238.16	248.921	12.7936	28.8316	29.3332	217.052	230.434	225.625
		220.22	230.97	229.597	234.474	236.521	22.7387	21.0883	17.9859	221.736	223.895	230.551	239.07	234.941	234.026	236.846	21.1774	27.4848	17.8835	231.376	238.545	220.602	235.732	232.595	14.9567	8.01628	26.7787	8.62918	229.263	236.711	236.24	243.607	245.686	230.331	228.788	9.47197	28.2279	24.8209	237.072	238.669	233.835
		240.384	233.42	233.028	234.501	242.762	236.725	16.1016	19.8884	225.027	237.592	235.202	223.253	237.575	232.733	238.173	29.7509	18.3938	26.7893	234.69	240.227	229.128	238.703	235.074	10.9098	27.6486	13.9832	22.4334	221.525	231.678	246.215	238.854	243.025	236.918	237.579	16.807	12.7703	16.4632	18.7531	236.571	238.816
		243.303	235.057	231.548	236.669	238.358	23.349	21.5707	6.98052	244.512	220.147	235.074	246.154	238.289	234.795	19.0439	18.4125	25.7988	241.642	219.56	244.88	251.109	232.787	239.875	35.0896	25.6716	29.4054	16.2975	237.402	237.388	236.309	233.819	240.35	243.474	241.338	22.2368	26.1071	12.5709	9.48851	246.714	243.229
		231.628	233.061	236.463	245.912	15.6463	25.3015	12.7809	28.5083	239.469	228.454	245.999	237.296	234.968	248.249	11.8819	20.6023	21.9331	21.9792	241.991	237.78	235.875	233.593	230.192	38.6983	19.4356	20.768	30.8799	10.8058	250.317	241.841	232.728	240.996	234.188	230.971	17.8042	18.8348	16.367	28.8456	240.102	247.721
		233.381	228.803	230.863	236.253	20.5209	16.0942	16.148	12.5546	237.743	241.576	245.634	228.346	233.477	221.679	13.0213	18.4336	17.2392	25.3272	235.842	218.968	231.228	238.731	236.071	32.8731	35.8435	23.7593	23.1633	27.4461	233.961	233.846	239.105	243.107	249.026	215.209	27.0422	26.9745	28.2099	22.4289	247.855	247.675
		245.661	233.213	241.24	233.018	18.4122	25.6016	11.3746	28.1134	238.474	231.511	241.903	234.169	240.137	234.655	18.4542	17.0066	26.823	25.297	239.712	233.858	226.178	229.874	231.779	29.3652	23.2869	13.6517	18.2787	18.1625	227.533	246.132	247.685	243.438	229.832	233.651	21.6597	18.333	18.4807	12.8011	232.786	236.13
		248.458	242.641	235.887	22.8507	26.5231	12.4226	20.7669	25.1242	236.951	236.476	228.72	241.321	232.927	232.262	23.7038	15.7176	11.0832	19.4973	235.109	241.358	235.412	236.163	244.478	230.753	22.2949	16.4852	26.4273	16.4329	228.124	241.724	229.166	236.051	239.724	236.73	22.8549	24.2496	15.2597	23.1939	232.085	224.362
		231.57	243.816	222.052	16.0032	27.0271	10.9471	17.4198	20.496	226.844	234.984	233.811	231.357	232.495	20.0953	16.9876	26.5278	18.6349	16.1043	235.393	236.928	241.737	235.185	233.02	235.355	17.7351	19.8435	26.2294	22.2764	232.265	236.801	231.424	234.95	224.927	240.765	24.3767	15.8198	23.6474	8.00737	231.755	226.443
		237.068	236.196	30.9673	24.8615	28.653	24.5859	22.9431	14.3653	245.442	234.152	235.896	242.198	236.526	18.376	15.6557	17.4797	11.8961	28.6824	231.806	240.805	235.615	239.133	227.615	246.572	17.4719	36.3537	19.0324	26.2314	227.934	237.376	236.54	228.839	235.707	231.653	231.538	21.8692	19.553	22.0716	236.236	236.677
		241.578	234.355	30.6263	18.045	26.73	28.9087	25.9775	244.357	243.494	228.734	228.487	228.421	234.261	19.7863	13.5636	14.5343	23.6869	19.3145	223.632	238.098	242.33	244.66	234.33	239.357	226.262	25.5027	22.9099	231.65	232.946	230.64	238.294	248.254	236.025	236.099	228.545	25.2834	22.1019	19.2446	248.263	243.052
		247.286	236.718	19.5514	18.9509	15.8869	21.9507	17.627	236.121	231.293	230.917	247.77	234.416	231.505	23.2967	9.49463	26.1453	20.0767	26.4527	239.164	250.901	236.187	242.423	235.434	233.785	233.722	22.8976	31.2147	236.202	237.071	234.727	234.393	239.073	233.7	221.559	239.916	20.9009	16.5039	20.3796	238.327	233
		230.703	242.454	239.759	24.279	19.0492	17.8861	26.9158	238.358	229.05	234.388	219.329	234.196	229.506	231.926	19.0369	27.6785	15.8529	223.329	223.241	243.775	228.479	232.085	233.928	242.974	17.9722	33.8501	33.5455	234.087	244.854	232.861	244.334	250.521	240.084	236.544	228.644	29.32	15.5196	16.9687	243.145	239.568
		232.919	238.866	237.555	235.871	10.7172	12.0941	21.4174	243.881	229.176	236.133	237.947	236.144	242.262	229.002	12.57	26.7449	16.626	246.931	240.064	231.433	226.268	242.239	244.366	234.691	23.7308	20.1624	22.4636	242.147	231.618	243.954	225.181	228.808	241.655	243.993	29.3767	16.6062	24.7136	21.1469	226.561	234.944
		243.5	241.621	237.97	238.74	25.436	21.488	28.6326	15.9351	235.868	231.556	246.236	238.585	233.032	234.208	18.0038	14.2846	27.0627	238.236	241.679	235.944	247.058	238.068	242.985	13.6328	14.8759	22.6429	242.16	229.019	238.851	230.382	229.191	223.873	236.196	244.896	20.8751	22.2553	17.147	234.903	230.419	225.225
		239.008	230.898	238.971	240.728	19.247	24.4051	26.2843	22.1287	238.14	237.897	242.463	226.32	232.709	238.649	239.21	30.8485	22.2517	234.217	232.825	236.844	240.726	232.096	238.92	25.8899	29.9705	24.9382	220.469	236.316	235.257	233.899	231.105	236.461	239.525	31.8512	14.2962	15.1052	248.389	225.896	243.235	235.25
		225.023	226.414	232.248	234.891	233.825	21.9674	17.4715	20.7279	231.41	238.255	234.634	239.776	233.386	226.802	232.633	21.3625	30.3898	239.518	240.856	240.061	230.986	231.718	24.9818	16.5115	10.7797	239.803	241.761	239.942	240.13	227.534	230.808	227.135	25.0186	22.2431	10.8529	10.687	233.378	231.402	242.938	242.664
		226.05	228.238	238.198	227.24	231.132	25.2416	17.2613	20.1162	231.925	232.372	230.722	238.869	235.616	238.703	21.8979	12.593	24.686	246.139	232.846	238.236	226.303	238.955	21.056	17.1911	25.0558	231.009	226.619	233.592	221.047	240.346	240.723	236.47	26.6074	21.5749	26.0736	234.23	231.854	235.128	232.429	236.879
		247.574	229.56	247.764	247.616	245.831	21.8353	27.9175	11.2022	243.93	235.458	235.413	237.096	235.582	237.965	27.259	19.2219	6.95114	231.122	234.447	230.518	230.052	22.7604	23.022	17.9458	236.746	236.029	229.552	245.022	234.148	235.429	230.99	238.337	233.42	21.4572	12.6754	230.362	229.966	224.805	228.498	239.347
		232.326	240.743	240.9	240.579	232.273	21.1927	20.8466	14.8407	228.494	241.02	241.827	233.642	240.095	19.8495	21.9506	19.544	236.378	234.973	231.748	236.531	241.169	16.4435	14.2665	222.678	240.709	235.921	235.394	225.209	240.976	228.287	241.497	228.083	239.117	22.8553	17.046	11.8977	242.567	236.305	235.81	237.031
		238.554	243.768	228.063	234.327	237.15	30.603	29.0163	23.8386	232.73	237.616	228.567	232.759	225.181	30.7129	15.4954	23.3733	233.632	246.426	235.087	245.608	242.304	234.083	12.2089	234.707	240.322	237.398	226.149	238.133	248.046	240.538	228.939	233.318	237.386	230.584	238.048	231.79	242.628	243.515	229.617	233.963
Sample 3	Target Data	255	255	255	255	255	0	0	0	255	255	255	255	255	255	0	0	0	255	255	255	255	255	255	255	0	0	0	0	255	255	255	255	255	255	0	0	0	255	255	255
		255	255	255	255	255	0	0	0	255	255	255	255	255	255	0	0	0	255	255	255	255	255	255	255	0	0	0	0	255	255	255	255	255	255	0	0	0	255	255	255
		255	255	255	255	255	0	0	255	255	255	255	255	255	255	255	0	0	255	255	255	255	255	255	255	255	0	0	255	255	255	255	255	255	255	0	0	0	255	255	255
		255	255	255	255	0	0	0	255	255	255	255	255	255	255	0	0	0	255	255	255	255	255	255	255	0	0	0	255	255	255	255	255	255	255	0	0	255	255	255	255
		255	255	255	255	0	0	0	255	255	255	255	255	255	255	0	0	0	255	255	255	255	255	255	255	0	0	0	255	255	255	255	255	255	0	0	0	0	255	255	255
		255	255	255	0	0	0	0	255	255	255	255	255	255	0	0	0	0	255	255	255	255	255	255	0	0	0	0	255	255	255	255	255	255	0	0	0	0	255	255	255
		255	255	255	0	0	0	0	0	0	0	255	255	255	0	0	0	0	255	255	255	255	255	255	0	0	0	0	0	255	255	255	255	255	0	0	0	0	255	255	255
		255	255	0	0	0	0	0	0	0	0	255	255	0	0	0	0	0	0	0	0	255	255	255	0	0	0	0	0	255	255	255	255	255	0	0	0	0	255	255	255
		255	0	0	0	0	0	0	0	255	255	255	255	0	0	0	0	0	0	0	0	255	255	255	0	0	0	0	0	255	255	255	255	255	0	0	0	0	0	255	255
		255	0	0	0	0	0	0	0	255	255	255	0	0	0	0	0	0	0	255	255	255	255	0	0	0	0	0	0	0	255	255	255	255	0	0	0	0	0	255	255
		255	0	0	0	0	0	0	0	255	255	255	0	0	0	0	0	0	0	255	255	255	255	0	0	0	0	0	0	0	0	255	255	255	0	0	0	0	0	255	255
		255	0	255	0	0	0	0	0	255	255	0	0	0	0	0	0	0	0	255	255	255	255	0	0	0	0	0	0	0	255	255	255	255	255	0	0	0	0	255	255
		255	255	255	255	0	0	0	0	255	255	255	0	255	255	0	0	0	0	255	255	255	255	0	0	0	0	0	0	255	255	255	255	255	255	0	0	0	0	255	255
		255	255	255	0	0	0	0	0	255	255	255	255	255	0	0	0	0	0	255	255	255	255	0	255	0	0	0	0	0	255	255	255	255	255	0	0	0	0	255	255
		255	255	255	0	0	0	0	0	255	255	255	255	255	0	0	0	0	0	255	255	255	255	255	255	255	0	0	0	0	255	255	255	255	255	0	0	0	0	255	255
		255	255	255	0	0	0	0	0	0	255	255	255	0	0	0	0	0	0	255	255	255	255	255	255	0	0	0	0	0	255	255	255	255	255	255	0	0	0	255	255
		255	255	0	0	0	0	0	0	0	255	255	255	0	0	0	0	0	0	0	255	255	255	255	0	0	0	0	0	0	255	255	255	255	255	0	0	0	0	255	255
		255	255	0	0	0	255	0	0	0	255	255	0	0	0	0	255	0	0	0	255	255	255	0	0	0	0	0	0	0	255	255	255	255	255	0	0	0	255	255	255
		255	255	0	0	0	255	0	0	0	255	0	0	0	0	255	255	255	0	0	255	0	0	0	0	0	255	0	0	0	255	255	255	0	0	0	0	0	255	255	255
		255	255	0	0	255	255	255	0	0	255	0	0	0	255	255	255	255	0	0	0	0	0	0	255	255	255	0	0	0	255	255	255	0	0	0	0	0	255	255	255
		255	0	0	0	0	255	255	0	0	255	0	0	255	255	255	255	255	255	0	0	0	0	255	255	255	255	255	0	0	255	255	255	0	0	0	0	0	255	255	255
		255	0	0	0	255	255	255	0	0	0	0	0	255	255	255	255	255	255	0	0	0	255	255	255	255	255	0	0	0	255	255	255	0	0	0	0	0	255	255	255
		255	0	0	0	0	255	255	255	0	0	0	0	255	255	255	255	255	255	0	0	0	255	255	255	255	255	0	0	0	255	255	255	255	0	0	0	0	255	255	255
		255	255	255	255	255	255	255	255	255	255	255	255	255	255	255	255	255	255	255	0	255	255	255	255	255	255	255	255	255	255	255	255	255	255	255	255	255	255	255	255
	Restored Data	235.139	233.011	233.458	241.107	226.946	19.2146	23.4851	12.5666	233.954	244.003	231.401	228.979	236.733	236.29	16.4864	11.6717	10.3769	235.233	227.885	232.436	226.626	237.609	243.239	236.923	28.7401	19.3404	18.4623	19.0449	239.399	242.854	242.179	234.829	222.467	226.31	29.6515	25.8241	19.5664	227.639	223.384	238.251
		228.116	239.086	243.346	235.427	235.289	12.9654	21.4468	15.1321	225.21	228.635	242.065	231.984	237.423	238.077	34.2911	19.771	27.6702	231.935	232.814	236.394	231.112	228.249	235.1	238.688	27.1328	26.2895	14.2116	17.0289	243.051	231.914	225.403	242.168	235.184	236.395	18.9729	29.4297	30.5563	224.72	225.344	237.649
		239.245	228.657	243.581	224.739	240.951	16.049	10.3708	237.461	241.895	236.343	234.906	244.623	231.203	233.635	233.132	24.9742	30.4555	228.199	228.615	228.631	228.497	234.433	233.302	235.076	222.679	16.0094	18.9675	231.793	229.382	240.747	222.299	241.072	236.152	227.668	23.0061	32.3727	15.4611	230.913	246.657	231.283
		228.101	233.54	229.304	234.371	16.351	8.98989	23.85	238.594	231.963	244.343	236.117	242.179	247.72	231.121	15.8564	13.3079	16.9955	231.586	235.666	239.602	231.986	228.53	237.798	240.507	18.9761	26.822	22.0593	235.335	239.346	228.013	225.852	234.286	248.915	221.179	15.3801	29.9005	237.548	226.293	240.924	229.935
		234.136	234.524	233.535	222.76	19.3093	17.5522	28.804	232.181	236.675	234.356	226.241	236.521	236.873	235.307	23.9383	20.7828	22.0716	231.11	238.031	230.666	244.415	247.344	241.3	246.34	15.4505	17.4286	21.739	243.255	243.831	229.978	233.261	230.691	229.611	16.8661	16.7493	18.4797	22.9854	232.218	238.054	246.135
		236.525	232.671	234.423	12.1971	10.5292	18.9389	33.0283	245.059	237.792	230.642	228.766	245.646	240.446	14.5799	25.1787	15.5922	19.5734	238.114	217.701	224.876	220.344	234.962	235.611	18.7138	25.9124	18.5952	19.7953	232.306	215.689	242.075	242.84	233.445	246.963	20.6051	9.67247	25.2664	10.0658	240.61	228.885	230.668
		239.904	234.961	225.962	8.86436	16.4854	16.3304	13.8041	23.7138	26.5082	12.2761	224.888	234.724	238.661	22.5998	20.357	25.0431	26.1865	238.038	231.061	237.738	228.767	246.532	240.259	22.1852	23.3133	17.0197	28.7142	20.3901	241.979	229.367	230.491	233.885	238.649	22.0365	27.347	6.81293	30.7987	230.025	235.325	250.285
		241.181	230.782	9.41596	16.846	19.108	28.7358	17.5039	6.36622	17.554	25.1902	231.606	242.898	21.1104	23.1161	23.2913	24.3407	9.17	16.7639	26.5354	18.3693	245.77	233.634	238.772	28.9569	17.1188	14.427	18.4227	15.7835	230.18	237.312	234.647	224.358	235.764	13.6562	19.3183	31.0364	18.3852	231.409	232.812	239.835
		230.207	17.291	23.9758	28.2389	17.0774	19.5687	13.5732	12.9014	239.47	235.846	230.474	237.213	19.4621	27.7485	12.9567	23.0492	13.8087	28.9553	15.9422	23.5997	240.921	230.797	231.07	19.7295	22.1323	21.4133	22.1644	16.9699	241.325	231.346	231.177	236.143	237.891	30.67	27.3701	17.8851	33.0157	14.9772	226.501	232.889
		242.314	20.1566	20.0806	22.894	18.2525	21.4383	16.517	19.6808	236.227	240.431	234.387	21.692	25.786	21.3603	17.504	17.2163	31.3152	19.6658	230.253	242.223	233.134	245.65	18.6241	26.2106	15.6256	29.1915	27.4634	27.7692	19.9563	245.558	238.078	234.482	237.774	18.0862	40.1718	14.0102	14.4006	19.1478	238.496	230.335
		249.331	8.79827	23.9974	18.2921	29.5749	26.1602	15.7337	8.81254	237.929	225.982	235.652	27.1546	20.2528	12.4806	16.2904	33.2232	28.0143	22.2629	218.213	236.786	241.22	232.775	20.3335	19.564	16.5031	18.8894	16.7098	16.3209	21.386	23.994	240.166	233.498	239.999	27.3556	31.0478	26.6054	25.5341	14.9617	228.01	241.163
		230.385	21.595	242.966	10.9205	29.324	22.7959	26.2075	17.6733	234.975	237.143	22.8645	22.514	20.2809	18.9455	16.2351	18.173	26.1223	13.3549	236.618	232.763	231.374	238.517	21.5974	18.5377	22.9794	8.05929	21.0465	15.7336	31.8949	236.257	230.44	243.893	226.125	225.99	17.5513	19.004	27.2695	22.6525	243.298	255
		235.811	246.611	241.776	241.105	14.3807	19.8341	20.886	17.3656	232.816	223.533	233.687	2.54095	238.089	232.808	11.3888	26.3906	24.8993	14.6068	230.98	228.908	239.321	234.255	16.8167	35.6172	21.3736	12.9404	27.6471	27.6606	232.543	239.527	240.46	218.35	232.289	237.988	21.5372	24.7897	26.5709	19.0701	227.641	235.857
		239.24	241.586	237.843	29.0896	27.0651	27.0335	15.3584	20.4616	236.339	229.425	235.4	232.829	235.43	14.3399	27.3341	18.9965	10.2578	17.0477	238.095	240.751	220.688	245.724	14.507	236.146	15.8328	24.5345	3.95711	24.2518	30.9188	230.094	239.105	231.225	243.314	237.219	6.79991	32.758	22.2585	17.6371	235.873	239.578
		240.726	231.917	238.985	24.0559	15.6576	17.8991	28.861	19.1469	240.913	232.01	231.14	234.183	238.132	21.0199	8.8219	19.5883	23.1029	21.902	239.451	236.86	231.129	230.05	238.545	235.957	238.519	14.1353	24.3346	16.8525	11.3857	231.214	243.742	225.066	238.714	233.055	16.5681	19.2097	20.4774	29.592	238.476	224.589
		239.605	234.571	231.674	18.1006	28.4603	21.1637	20.9297	24.2191	24.811	240.665	215.789	236.673	15.9888	27.9244	12.0737	15.813	18.1849	23.6505	238.662	240.228	225.73	236.462	235.705	232.336	13.663	24.138	32.8061	16.9218	25.5085	241.668	237.513	227.727	231.98	232.083	228.354	3.40021	20.1887	18.899	242.875	232.34
		232.28	234.652	19.8328	17.9519	25.8619	16.6116	24.1622	10.0181	17.9818	234.9	228.962	234.703	31.6453	17.2987	19.8995	25.4004	22.4323	17.2083	17.1818	239.941	232.932	236.363	238.648	16.9812	12.4353	18.9428	18.2321	10.8665	17.992	245.223	250.404	227.166	240.053	236.985	20.1004	15.5136	22.6164	30.0522	225.41	239.017
		234.571	230.586	27.2268	23.921	16.5405	235.342	25.9952	27.3485	19.2299	229.021	237.589	18.1922	20.9635	15.2815	21.931	226.634	11.7429	23.5981	9.48285	244.111	248.029	234.574	12.4355	21.5542	25.9239	24.4825	24.8636	20.2029	22.7375	225.281	239.208	245.146	235.178	230.849	20.9439	9.1549	20.405	238.601	243.004	243.625
		239.574	241.972	18.5139	11.4526	31.7857	226.108	23.8909	16.9473	13.0247	223.308	23.0983	25.8473	21.2619	22.2467	237.25	235.476	237.039	10.8323	32.1733	230.041	17.8559	14.5363	13.3308	17.315	23.6177	239.65	22.2261	17.4887	18.459	227.661	239.003	229.907	11.2645	24.3158	18.8903	25.4395	22.1382	232.953	238.41	229.515
		233.538	232.881	18.9098	18.8781	232.547	230.622	242.533	21.2105	13.4724	244.206	19.3106	7.81059	21.0627	237.821	223.301	233.856	230.369	21.8908	4.7435	22.7642	24.8593	25.9297	28.4319	232.986	243.852	233.944	21.3967	16.3705	22.2812	236.814	238.178	244.463	32.9221	22.0427	28.7689	23.0255	21.9395	229.184	239.234	232.23
[truncated: 4 more rows]

## Sheet: 3f
Target Data	60.5625	60.5625	60.5625	60.5625	59.5	59.5	60.5625	60.5625	59.5	59.5	59.5	59.5	59.5	59.5	58.4375	59.5	57.375	57.375	58.4375	57.375	58.4375	58.4375	58.4375	58.4375	58.4375	57.375	57.375	57.375	56.3125	57.375	56.3125	55.25	56.3125	55.25	55.25	56.3125	55.25	55.25	55.25	56.3125	55.25	55.25	55.25	56.3125	55.25	54.1875	53.125	54.1875	53.125
[truncated: 255 more rows]
[truncated: 15 more columns]

[truncated: 10 more sheets: 3g, 4c, 4d, 4e, 5b, 5c, 5d, 5e, 5f, 5g]
